# Supplementary material for: Impaired immune signaling and changes in the lung microbiome precede secondary bacterial pneumonia in COVID-19
Source: Res Sq. 2021 Apr 23:rs.3.rs-380803. Preprint. [Version 1] doi: 10.21203/rs.3.rs-380803/v1 (PMC8132240; doi:10.21203/rs.3.rs-380803/v1)
Supplement: Supplement 5 [file 2bf4ee556c78bd6f90f639be.xlsx]

## Sheet: VAP_vs_Control_EarlyTime
Upstream Regulator_Cytokine	Activation z-score	p-value of overlap	Target Molecules in Dataset	Mechanistic Network
IL4	-4.951	6.14e-15	ABLIM1,ADAP1,ADRM1,AHR,ALAS1,ALDH2,APH1A,APOE,APRT,ARG1,B4GALT7,BBX,BCAT2,BCL11A,BIN1,BIRC2,BPIFA1,BTAF1,C5AR1,CA2,CAND1,CAPG,CARM1,CAT,CCND2,CCND3,CD14,CD163,CD163L1,CD200R1,CD274,CD276,CD300A,CD38,CD6,CD69,CD72,CD74,CDKN1A,CEP43,CHST7,CKAP4,CLEC10A,CMPK2,CNTF,COBLL1,COL18A1,COL6A2,CRIP1,CSF1R,CTNNA1,CXCL1,CXCL10,CXCL16,CXCL3,CYTH1,DCTN1,DDAH1,DENND4A,DHX58,DOCK10,EBNA1BP2,EFHD2,EGLN1,EIF2AK2,EI…	938 (16)
SPP1	-3.878	0.00329	AKT1,ARG1,BCL2L11,CA2,CCS,CD163,CDH1,CDKN1A,CXCL1,CXCL3,CXorf21,FGFR2,GCDH,GPX4,GSTZ1,HMOX1,HTATIP2,IL1B,ILK,ITGB5,JAG1,LIF,LOX,MMP14,MMP2,MMP7,MMP9,NDUFS7,NDUFS8,NOTCH1,OCLN,PGD,PLOD1,RUNX2,S100A4,S100A6,SNAI1,TGFB1,TGFBR1,TIMP1,TNF,VAT1,VIM	1157 (17)
IL5	-3.738	0.000207	ACAA2,ALDOA,ATP1B1,BIRC2,CA4,CCND2,CCND3,CD63,CD69,CDKN1A,CHMP1A,CKAP4,CRIP1,EBP,EGLN1,ELL2,ENO1,EPOR,EPS8,GADD45G,GBP4,GCAT,GCLM,GLIPR2,HSPA5,HSPA6,IFI30,IL18BP,IL1R2,IL5RA,IL6R,IRF7,ITGAM,KCNAB2,KLHDC2,LFNG,LTB,MANF,METRNL,MKNK1,MMP9,MS4A2,MYADM,NACA,NDRG1,PDE4B,PGM1,PKM,PMP22,PPIF,PRDM1,QSOX1,RASGRP2,RHOH,RRAS2,S100A4,S100A6,SDF2L1,SKA1,SLC16A3,SLC2A1,SNTB1,TGFB1,TNF,UPP1,VIM,ZNF443,ZYX	798 (16)
EDN1	-3.72	0.00924	ADAM12,ANXA5,ARF6,ARHGEF11,ATF6,CDH1,COL7A1,CST3,CTNND1,ENAH,FOSL1,GRN,HSPA5,ITGA5,ITGAM,JUN,LEP,MAP2K1,MARCKSL1,MBP,MCAM,MMP2,MMP7,MMP9,MSN,MYL6,MYO9B,NCF1,NPPA,PLOD1,PRKCD,PRKCE,PTGER2,PTGS1,PXN,SLC2A1,SLC8A1,SOCS3,SOX5,TIMP1,TNC,VCAN,VCL,VIM	1187 (20)
IL1RN	-3.148	1.9e-07	BTN3A1,CNTF,CXCL1,CXCL3,DDX58,EIF2AK3,ERAP2,GBP1,GRIA1,GSDMD,HERC6,HLA-DQB1,IFI44,IFI44L,IFI6,IFIH1,IFIT3,IFIT5,IL18BP,IL1B,IL23A,IRF7,IRF9,L1CAM,LIF,LIFR,MMP9,MX1,OAS1,OAS2,OAS3,OASL,PML,RSAD2,RTP4,SAMD9,STAT2,THEMIS2,TIMP1,TNF,TNFSF10,TRIM22,USP18,YLPM1	768 (15)
CSF1	-2.961	1.26e-07	APOE,ARG1,AXL,BCL2L11,C5AR1,CCND2,CCND3,CD163,CD163L1,CD68,CD74,CDKN1A,CEBPA,CFP,CREB1,CSF1R,CTSD,CTSH,CXCL3,DOK2,EBP,ENO1,F2R,F2RL2,FERMT3,FOLR2,GPNMB,HK2,HSPA5,IL10RA,IL18BP,IL1B,IL23A,IL6ST,IRF7,ITGA5,ITGAM,ITGAX,ITGB5,JDP2,JUN,LAMP1,LBR,LPL,MAFB,MAP3K3,MARCO,MMP9,MRC1,MSR1,MVK,NCF2,NKIRAS1,OSCAR,PFKL,PKM,RAB5B,RHOA,SIRPB1,SLC16A3,SLC29A1,SLC2A1,SLC37A2,SPARC,SPI1,STAB1,STAT1,SYNGR1,TGFB1,TLN1…	863 (17)
CSF3	-2.884	0.00812	ARG1,ARHGDIA,BIRC3,CAPG,CCND2,CCND3,CD14,CD177,CEBPA,CEBPB,CEBPD,CEBPE,CST3,CTSD,CXCL3,ERAP2,GADD45G,HLA-DPA1,HLA-DQA1,HLA-DRB1,HMOX1,IL1RN,IL7,ITGAM,ITGB2,JUN,KIT,LTB,LYZ,MMP2,MMP8,MMP9,PLCB2,PRKCE,SOCS3,SPI1,TGFB1,TNF,TNFSF10,YPEL3	818 (14)
IL15	-2.808	1.4e-06	AHR,AKT1,ALDOA,AQP3,ARHGDIB,ARNT,BBC3,BCL2L11,BRK1,CALM1 (includes others),CCND2,CCND3,CD160,CD244,CD274,CD38,CD69,CD74,CDH1,CDKN1A,CEBPB,CORO1A,CREBBP,CXCL10,DDT,DDX18,DHRS4,EBP,EGLN1,ENO1,ENO3,FAM160B1,FBP1,G6PD,GAPDH,HAVCR2,HCST,HK2,HMOX1,HNRNPF,IFI35,IFIT1,ITGAX,ITGB5,JUN,KIT,LAMP1,LEP,LIF,LSP1,MACROH2A1,MAF,MAP2K1,MAPK1,MAPKAPK3,MICA,MIF,MKI67,MKNK1,MSLN,MX1,NAGA,NCR3,NME4,NOTCH1,NR3C2,OAZ1,…	971 (14)
TNFSF11	-2.7	0.000128	AEBP2,AHR,ATP6V0D2,BSG,CA2,CCND3,CD14,CDKN1A,CEBPA,CLEC11A,CLOCK,CSF1R,CXCL3,DAB2,DOK2,F3,FERMT3,FGR,FOSL1,GCLC,GRN,HCLS1,HMOX1,IL11,IL1B,IL1RN,IL9R,ITGA5,ITGAL,ITGAM,ITPKB,JDP2,JUN,LAT,LIMK1,MAFB,MAP2K1,MARCKSL1,MEF2B,MMP9,MT-CO1,MT-CYB,NAB2,NFKBIB,NR1H3,OSCAR,PHLDA3,PLK1,PRDM1,PTGER2,RCAN1,RGL1,RGS16,RHOB,RRAS,SAA1,SLC2A1,SLC7A7,SOCS3,SPIB,STAT1,TGFB1,TLN1,TNF,USP18	913 (13)
IL33	-2.462	0.0473	APOE,ARG1,ARHGAP30,ARRB1,AXL,BCL2L11,BIRC3,CD69,CD72,CHST11,CXCL10,CXCL16,CXCL3,EBI3,FER1L6,FGD2,FGR,GCHFR,GRK2,HMOX1,IKBKG,IL10RA,IL1B,IL1RN,ITGA5,ITGAM,ITGAX,JAG1,KLC1,MCEMP1,MSR1,NFKBIB,PDGFB,PIK3CD,PIK3R5,PIM2,PLIN2,PREB,PTPRK,RAI14,REL,RPS6KA2,SCARB1,SCGB3A1,SELPLG,SLC11A1,SOCS3,SPI1,ST3GAL5,TGFB1,THEMIS2,TIMP1,TNF,TNFSF10,TPSAB1/TPSB2,TUBB6
IL17A	-2.372	0.0537	CD14,CD163,CD274,CD68,CDH1,CEBPB,CEBPD,COTL1,CXCL1,CXCL10,CXCL3,CYTH3,FOSL1,IL16,IL17RA,IL1B,IL1RN,IL23A,ISG15,JAG1,JUN,LEP,LIF,LOX,LPL,MAP2K3,METRNL,MMP2,MMP8,MMP9,MRC1,NRP1,OCLN,OSMR,PECAM1,PI3,PODXL,PRDM1,RGS16,S100A12,SLC2A1,SOCS3,THBD,TIMP1,TIMP2,TLR3,TNC,TNF,TNFRSF14,TNFSF12,VIM,YWHAG
CCL2	-2.265	0.0017	CEBPA,CEBPB,CEBPD,CXCL10,CXCL3,F3,FABP4,FOLR2,IL1B,IL23A,ITGA1,ITGA5,ITGAL,LAMP1,LPL,MKI67,MMP2,MMP9,NCF1,NOTCH1,SCARB1,SLC11A1,STAT1,TGFB1,TIMP1,TNF	934 (15)
IL18	-2.234	0.422	AQP3,BSG,CD244,CD69,CDH1,CXCL10,CXCL16,CXCL3,DDIT4,GADD45G,GNA15,HAVCR2,IL18BP,IL1B,ITGAL,ITGAM,JUN,KIT,LIF,LTB,MMP9,NCR3,NKG7,NPPA,SAMHD1,SLC17A7,SLC2A3,TIMP1,TNF,TRIM29,VAMP2
CCL18	-2.232	8.17e-05	MMP2,MMP9,S100A4,SNAI1,TGFB1,TNF	278 (5)
CXCL5	-2.205	0.000456	CDH1,ITGAL,ITGAM,SNAI1,TNF	743 (15)
IL1A	-2.181	0.149	BIRC2,BIRC3,BTN3A3,CA2,CD274,CDKN1A,CXCL1,CXCL10,CXCL3,CYP2B6,FAM89B,FOSL1,FTH1,GBP1,HMOX1,HSD3B1,IL11,IL1B,IL1R2,IL1RN,IRAK1,ITGA5,JUN,KIT,LEP,LIF,LOX,MCAM,MMP10,MMP14,MMP2,MMP9,ORM1,PDGFB,PI3,PTGES,S100A10,S100A12,SAA1,SPARC,TGFB1,TICAM1,TIMP1,TNF,VIM
IL3	-2.171	7.33e-05	AKR1A1,ALDH2,ARG1,ARHGAP29,ARHGDIB,ARHGEF1,ATF5,BCL2L11,BIRC3,C1QA,CAPZB,CAT,CCND2,CCND3,CD14,CD63,CD69,CDKN1A,CIAPIN1,CLEC11A,CSF1R,DOK2,EIF2AK2,EIF3G,EMP3,F2R,GADD45G,HDGF,HK2,HSPA2,HSPA5,HSPA9,IL1B,IL5RA,ITGAM,ITGAX,JUN,KLF13,LATS2,LIF,LILRB4,MAN2B1,MID1,MLF2,MS4A2,NACA,NCF1,NOTCH1,NRP1,PDE1B,PFKL,PIM2,PLA2G7,PLCB2,PPM1G,PSMB3,PTPN11,RPL3,RPS12,RPS17,RPS19,SEMA7A,SH3BP1,SLC2A1,SLC2A3,SMAD5,SOC…	739 (15)
TNFSF14	-2.136	0.143	BIRC3,CDH1,CXCL1,CXCL10,CXCL3,MMP9,TGFB1,TNF
IFNA16	2.188	0.000738	CXCL10,HAMP,IFIH1,IFIT1,ISG15,MX1,STAT4,ZBP1	436 (10)
IL21	2.194	0.000189	ARG1,BCL2L11,BSG,CALHM6,CCND2,CD244,CD38,CD69,CDKN1A,CLIC5,CMPK2,CXCL10,EIF2AK2,GBP5,HAVCR2,HCST,HERC6,HLA-DRB5,HSH2D,ID2,IFI16,IFIT1,IFIT2,IFIT3,IL23A,IL4I1,IRF7,ISG15,MKI67,MMP2,MMP9,NCR3,OAS2,OASL,PRDM1,PSMB9,RORA,RSAD2,SLFN13,SOCS3,STAT2,STAT4,TAP1,TGFB1,TNF,USP18	737 (16)
IFNA8	2.213	0.000738	CXCL10,HAMP,IFIH1,IFIT1,ISG15,MX1,STAT4,ZBP1	543 (13)
IFNA17	2.219	0.0132	CXCL10,EIF2AK2,IFIH1,MX1,STAT4,ZBP1
IFNL3	2.287	0.00269	DDX58,IFIH1,IL23A,IL5RA,MMP9,MX1,RSAD2,STAT1,TLR3,TNF,USP18	781 (15)
PRL	2.566	7.37e-13	ADAR,ANXA5,ARF3,BST2,CAMK1,CCND3,CD69,CDH1,CDKN1A,CEBPD,CLU,CMPK2,COX4I1,CST3,CTSB,CTSD,CTSH,CXCL10,DDX58,DDX60L,DHX58,ECM1,EIF2AK2,ENO1,EPSTI1,ERBB4,GPNMB,HERC5,HERC6,ID2,ID3,IFI35,IFI44,IFI44L,IFI6,IFIH1,IFIT1,IFIT3,IFIT5,IRF7,IRF9,ISG15,ITGA1,JUN,KRT14,LAMC1,LY6E,LYVE1,MAFG,MMP14,MSN,OAS1,OAS2,OAS3,OCLN,P4HB,PARP12,PARP14,PC,PDIA4,PIM3,PLSCR2,PNPT1,PPM1K,PTK2,RABAC1,RASD1,RHOG,RSAD2,SAMD9,SAMD…	1233 (21)
IFNA21	2.586	0.0026	CXCL10,IFIH1,IFIT1,ISG15,MX1,STAT4,ZBP1	436 (10)
IFNA10	2.592	0.0026	CXCL10,IFIH1,IFIT1,ISG15,MX1,STAT4,ZBP1	436 (10)
IFNA5	2.592	0.0026	CXCL10,IFIH1,IFIT1,ISG15,MX1,STAT4,ZBP1	905 (15)
IFNA7	2.592	0.0026	CXCL10,IFIH1,IFIT1,ISG15,MX1,STAT4,ZBP1	436 (10)
IFNA14	2.592	0.0026	CXCL10,IFIH1,IFIT1,ISG15,MX1,STAT4,ZBP1	436 (10)
IFNA6	2.592	0.0026	CXCL10,IFIH1,IFIT1,ISG15,MX1,STAT4,ZBP1	905 (15)
IFNE	2.685	0.000407	BST2,CDKN1A,CXCL10,HERC5,IFIH1,IFIT2,IFITM3,ISG15,PTGER2,SLC2A1,STAT1,STAT4,TLR3,TRIM5,USP18,ZBP1	577 (16)
IFNK	2.828	0.00511	CXCL10,EIF2AK2,IFIH1,MX1,OAS1,STAT1,STAT4,TLR3,ZBP1	701 (17)
WNT3A	2.893	0.109	ADGRF1,AHR,AQP3,ARRDC4,ATF6,ATP1B1,CCDC80,CCND2,CD274,CD300A,CD68,CEBPA,CEBPB,CLEC11A,CPT1C,DCUN1D3,DDIT4,DKK1,DVL3,ECRG4,ENG,ETV5,FABP4,GADD45G,GPNMB,HAS3,IKZF2,JAG1,JDP2,JUN,KCTD12,KIT,LRP6,MMP14,NDNF,NEK6,PAX3,PMP22,PRDM1,RFLNB,RHOA,RUNX2,SFRP2,SLC27A2,SPARC,TGFB1,TGFB2,TGFB3,TMEM158,TNC,TNF,TRIB3,TUBB3,VIM
IFNA4	2.93	0.00325	CD274,CD69,CXCL10,GBP5,IFIH1,IFIT1,IFIT2,ISG15,JAML,LILRB4,MX1,OASL,RSAD2,STAT4,USP18,ZBP1	891 (18)
IFNL4	3.425	2e-09	CXCL10,DDX58,DHX58,IFI6,IFIH1,IFIT1,ISG15,MX1,OAS1,OAS2,OASL,STAT1	379 (9)
IFNA1/IFNA13	4.358	7.02e-06	CD274,CD69,CXCL10,DHX58,EIF2AK2,IFI6,IFIH1,IFIT1,IFIT2,IL1B,IRF7,ISG15,MX1,OAS1,OAS2,RSAD2,STAT1,STAT2,STAT4,TLR3,UBE2L6,VEGFB,ZBP1	917 (18)
IFNB1	4.977	6.47e-05	ANXA5,APOL6,AXL,BST2,BTN3A3,CD14,CD274,CD38,CDKL2,CDKN1A,CMPK2,CXCL10,CXCL3,DAXX,DDX58,DHX58,DLL1,EBI3,EIF2AK2,F2R,GBP3,GBP4,GBP5,HERC5,IFI16,IFI6,IFIH1,IFIT1,IFIT2,IFIT3,IL1B,IRF7,IRF9,ISG15,ITGAX,MMP2,MMP9,MX1,NDUFA13,NOTCH1,NT5C3A,NUB1,OAS1,OAS2,PARP12,PARP14,PML,PRDM1,PTCH1,RAD51,REL,RND3,RSAD2,SIRPB1,SLFN13,STAT1,STAT2,STAT4,TIMP1,TIMP2,TLR3,TLR7,TLR9,TNF,TNFSF10,TRIM38,UBA7,USP18,VCL,XAF1,Z…	509 (17)
IFNA2	6.335	5.46e-12	APOL6,ATF5,BAG3,BST2,CD274,CD69,CDKN1A,CMPK2,CXCL10,DDX56,DDX58,DDX60,DNAJB2,EIF2AK2,EPB41L3,FBXO8,GBP1,GBP4,GPATCH11,HERC5,HERC6,HSH2D,HSPA6,IFI16,IFI27L2,IFI35,IFI44,IFI44L,IFI6,IFIH1,IFIT1,IFIT2,IFIT3,IFIT5,IFITM3,IFNAR2,IFT57,IL1B,IRF7,IRF9,ISG15,LILRB4,LY6E,MAP2K1,MMP9,MTOR,MX1,OAS1,OAS2,OAS3,OASL,PARP12,PARP9,PHF11,PLSCR2,PML,PPP1CA,PTTG1,RETREG2,RSAD2,SAMD9,SAMHD1,SOCS3,SP110,STAT1,STAT4,T…	930 (18)
IFNL1	6.587	3.02e-16	APOL6,BST2,CMPK2,CXCL10,DDX58,DDX60,DDX60L,EIF2AK2,F2R,GBP1,GBP5,GPATCH11,HERC5,HERC6,IFI35,IFI44,IFI44L,IFI6,IFIH1,IFIT1,IFIT2,IFIT3,IFIT5,IFITM3,IRF9,ISG15,MX1,OAS1,OAS2,OAS3,OASL,PHF11,PML,PSMB9,RSAD2,RTP4,SAMD9,SP110,STAT1,STAT2,TDRD7,TRIM22,UBE2L6,USP18,XAF1,ZC3HAV1	786 (15)

## Sheet: NOVAP_vs_Controls_EarlyTime
Upstream Regulator_Cytokine	Activation z-score	p-value of overlap	Target Molecules in Dataset	Mechanistic Network
IL1RN	-4.453	1.62e-07	BTN3A1,DDX58,EIF2AK3,ERAP2,GBP1,GSDMD,HERC6,IFI27,IFI44,IFI44L,IFI6,IFIH1,IFIT3,IFIT5,IGFBP5,IL23A,IRF9,MMP1,MX1,OAS1,OAS2,OAS3,PML,RIPK2,RSAD2,RTP4,S100A9,SAMD9,STAT2,THEMIS2,TIMP1,TNFSF10,TRIM22,USP18,YLPM1	723 (16)
IL10	-3.806	0.000482	AGER,ANKS1A,ARG1,BCL2,BCL3,BRCA2,BUB1B,CCL18,CCL23,CCL3L3,CCL5,CCND3,CCR5,CD14,CD2,CD274,CD28,CDKN2D,CLEC7A,CSF1R,CTSH,CXCL10,CXCL6,FAAH,GUSB,GZMB,HLA-G,IDO1,IFIT2,IL12RB2,IL17RA,IL1R2,IL23A,IL27,IL4R,ITGA4,ITGAM,LAG3,LGALS1,LGMN,LILRB2,LTB,MMP1,MMP8,MS4A2,NFKBID,NOS3,PAM,PRDM1,PSMB9,RAB34,RGS16,S100A8,SCGB3A2,SELPLG,SLAMF1,SLC11A1,SOCS3,STAT1,STAT4,TAP1,TAP2,TGFB1,TIMP1,TLR9,TNFRSF13B,TNFRSF1A,T…	699 (18)
IL4	-3.194	4.28e-14	ABCA2,ACOD1,ACOX1,ACTB,ACTG1,ADAM17,ADAP1,AHR,AKAP13,ALDH2,ALOX5,ANO1,APRT,ARG1,ARID5A,ARMC6,BANF1,BCL11A,BCL2,BCL3,BIN1,BTAF1,C5AR1,CAPG,CAT,CCL18,CCL23,CCL24,CCL3L3,CCL5,CCL7,CCL8,CCND3,CCR5,CD14,CD2,CD274,CD38,CD69,CD8A,CEP43,CKAP4,CLEC7A,CMPK2,CPOX,CRIP1,CSF1R,CST7,CTNS,CXCL10,CXCL6,CXCR1,DCTN1,DDHD1,DENND4A,DHX58,DPP4,EBNA1BP2,EFHD2,EGR2,EIF2AK2,EPHB4,F2RL2,FAAH,FABP4,FLNA,FLT3LG,FN1,GBP3,GB…	640 (17)
IL13	-3.151	0.00123	ACOX1,ADAM28,ADAM8,ADAMDEC1,AMPD2,ARG1,ASPN,AVPI1,BCL3,BLVRA,BTNL9,CCL18,CCL23,CCL24,CCL3L3,CCL5,CCL7,CCR5,CD14,CD247,CD3E,CD52,CEBPA,CEBPB,CLEC7A,CTSH,CXCL10,CXCL6,CXCR2,DHCR24,DMBT1,DMXL2,FABP4,G6PD,GNAI2,GPX4,IDO1,IL1R2,IL1RL1,IL23A,IL31RA,JAKMIP2,LILRB2,LILRB3,MCUR1,MMP1,MMP13,NCR3LG1,NFE2,PCM1,PDLIM2,PID1,QSOX1,RHOA,RIPK2,RPS6KA2,S100A8,SCGB3A1,SLC26A6,SOCS3,SPINT2,STAT6,SWAP70,TGFB1,TIMP1,T…	581 (16)
IL22	-2.943	0.0895	AKT1,BCL2,BCL3,CCL3L3,CCL5,CD274,CXCL10,CXCL6,CYBA,DMBT1,HP,IL23A,MMP1,MTOR,PRDX5,S100A12,S100A8,S100A9,SAA1,SOCS3
IL5	-2.509	0.000345	ALDOA,BCL2,BCL3,CA4,CCND3,CCR5,CD69,CHMP1A,CKAP4,CRELD2,CRIP1,CXCR2,EAF2,EGR2,EPOR,GBP4,HIF1A,HSPH1,IL1R2,IL1RL1,IL2RA,IL4R,IL6R,ITGAM,KLHDC2,LFNG,LRRC8C,LTB,MAPK6,METRNL,MKNK1,MS4A2,MYADM,NDRG1,NFE2,PGM1,PRDM1,PYCR1,QSOX1,RASGRP2,RHOH,S100A4,S100A6,SCRIB,SGK1,SLC16A3,TGFB1,TPM4,VIM,ZYX	728 (17)
EPO	-2.299	0.0412	ACTB,APOBR,BCL2,BCL3,CCND3,CD52,CHIT1,CLIC1,CPSF3,DHCR24,EPOR,FECH,HBA1/HBA2,HBB,HK3,HLA-DRB1,ID2,IL1RL1,ITGA4,KIT,LY6E,MYB,NFE2,NOS3,NUPR1,PAX6,PDLIM2,PIK3IP1,PRDM7,PRKCQ,RAB4A,RHOA,SIRT1,SLC24A1,SLC44A2,SMARCD2,SOCS3,SYP,TNFSF10,TSC22D3,XPC
CSF3	-2.078	7.41e-06	ARG1,ARHGDIA,BCL2,CAPG,CCL3L3,CCL5,CCND3,CD14,CD177,CEACAM8,CEBPA,CEBPB,CEBPD,CST3,CXCR2,EGR2,ERAP2,GNLY,GZMB,HLA-DPA1,HLA-DQA1,HLA-DRB1,ITGAM,ITGB2,KIT,LTB,MMP8,NOS3,PRKCE,PROK2,PYHIN1,RARA,S100P,SOCS3,SPI1,TGFB1,TNFRSF1A,TNFSF10,YPEL3	726 (16)
IL17A	-2.03	0.00437	ACTB,BCL2,BCL3,CCL5,CCL7,CD14,CD274,CEBPB,CEBPD,COTL1,CXCL10,CXCL6,EGR2,GUSB,IL16,IL17RA,IL23A,IL27,ISG15,LPL,MAP2K3,METRNL,MMP1,MMP13,MMP8,NOS3,OCLN,OSMR,PECAM1,PRDM1,RGS16,S100A12,S100A8,S100A9,SGK1,SOCS3,TGFA,THBD,TIMP1,TNC,TRAF6,TYMP,VIM	563 (16)
IL12A	2.018	0.000188	BCL2,CCL5,CCND3,CXCL10,ICOS,IL12RB2,IL27,IRF9,PRF1,SELPLG,SOCS3,STAT1,STAT2,STAT4	665 (17)
IL32	2.025	0.0145	BCL2,EIF2AK2,IL23A,ITGAM,ITGB2,MMP13,MX1,OSCAR,SPI1,THBD,TRAF6,VIM
CX3CL1	2.138	0.132	APOD,CST7,GYG1,HIF1A,ID2,IFI16,IFIT2,IFIT3,IMPDH1,LAMC1,MCOLN3,PAX6,RYR3,S1PR4,SAA2,SYP,TGFB1,TGFB3,TIMP1
WNT3A	2.434	0.0307	AHR,ALPL,BACE1,BCL2,CAMK4,CCL3L3,CD274,CEBPA,CEBPB,CFD,CLEC11A,CST7,DDIT4,DVL1,EGR2,ENG,FABP4,FCMR,FN1,FOXM1,IGFBP5,JDP2,KIT,LEF1,MMP13,NEK6,NRG1,PAX3,PDGFRA,PEX5,POU5F1,PRDM1,RFLNB,RHOA,RUNX2,SERPINB1,SLC7A11,SYTL3,TGFB1,TGFB3,TNC,VIM
IFNK	2.449	0.00774	CXCL10,EIF2AK2,IFIH1,MX1,OAS1,STAT1,STAT4	501 (17)
IL7	2.502	0.00329	AHR,BCL2,BTLA,CCND3,CD2,CD247,CD274,CD3G,CD69,CD8A,DPP4,FLT3LG,FN1,ICOS,IL18RAP,IL2RA,LEF1,LTB,MAPKAPK3,MMP13,MX1,PIK3IP1,RGS16,RUNX2,SELPLG,SOCS3,TNFSF10	609 (16)
IFNA21	2.586	0.000254	CCL8,CXCL10,IFIH1,IFIT1,ISG15,MX1,STAT4	270 (9)
IFNA10	2.592	0.000254	CCL8,CXCL10,IFIH1,IFIT1,ISG15,MX1,STAT4	270 (9)
IFNA5	2.592	0.000254	CCL8,CXCL10,IFIH1,IFIT1,ISG15,MX1,STAT4	601 (15)
IFNA7	2.592	0.000254	CCL8,CXCL10,IFIH1,IFIT1,ISG15,MX1,STAT4	270 (9)
IFNA14	2.592	0.000254	CCL8,CXCL10,IFIH1,IFIT1,ISG15,MX1,STAT4	270 (9)
IFNA6	2.592	0.000254	CCL8,CXCL10,IFIH1,IFIT1,ISG15,MX1,STAT4	601 (15)
IFNA16	2.592	0.000433	CCL8,CXCL10,IFIH1,IFIT1,ISG15,MX1,STAT4	270 (9)
IL27	2.597	4.67e-05	AHR,CCL5,CCL7,CCND3,CD14,CD274,CD38,CD69,CEBPD,CXCL10,EGR2,EIF2AK2,GZMB,HLA-DPA1,HLA-DQA1,ICOS,ID2,IL12RB2,IL15RA,IL2RA,ITGAM,LAG3,MX1,OAS1,PRDM1,SOCS3,STAT1,STAT2,TAP1,TNFSF10,TNFSF13,VIM	728 (18)
IFNA8	2.602	0.000433	CCL8,CXCL10,IFIH1,IFIT1,ISG15,MX1,STAT4	524 (13)
IFNL3	2.773	0.0086	DDX58,IFIH1,IL23A,IL2RA,MX1,RSAD2,STAT1,USP18	569 (14)
IFNE	2.985	0.0125	CXCL10,HERC5,IFIH1,IFIT2,IFITM3,ISG15,PTGER4,STAT1,STAT4,USP18
IFNL4	3.277	1.14e-09	CXCL10,DDX58,DHX58,IFI6,IFIH1,IFIT1,ISG15,MX1,OAS1,OAS2,STAT1	257 (9)
IFNA4	3.494	0.00199	CCL8,CD274,CD69,CXCL10,GBP5,IFIH1,IFIT1,IFIT2,ISG15,MX1,RSAD2,STAT4,USP18	592 (17)
IL21	3.699	1.55e-10	ARG1,BCL2,BSG,CALHM6,CCL24,CCL3L3,CCL5,CD2,CD28,CD38,CD69,CMPK2,CXCL10,DPP4,EIF2AK2,GBP5,GZMB,HERC6,HIF1A,HSH2D,ID2,IDO1,IFI16,IFIT1,IFIT2,IFIT3,IL12RB2,IL18RAP,IL23A,IL2RA,ISG15,NCR1,NCR3,OAS2,PRDM1,PRF1,PSMB9,RSAD2,SGK1,SLFN13,SOCS3,STAT2,STAT4,TAP1,TGFB1,TIRAP,TRAF3,TYROBP,USP18	692 (18)
IFNA1/IFNA13	4.152	2e-07	CCL8,CD274,CD69,CXCL10,DHX58,EIF2AK2,IFI27,IFI6,IFIH1,IFIT1,IFIT2,IFITM1,ISG15,MX1,OAS1,OAS2,RSAD2,STAT1,STAT2,STAT4,UBE2L6	612 (18)
PRL	4.266	3.95e-13	ACTB,ADAR,ARF3,BAG1,BCL2,CCND3,CD69,CEBPD,CLDN3,CMPK2,CST3,CTSH,CXCL10,DDX58,DDX60L,DHX58,DNAJA4,DVL1,EIF2AK2,EPSTI1,FN1,HERC5,HERC6,ID2,IDE,IFI35,IFI44,IFI44L,IFI6,IFIH1,IFIT1,IFIT3,IFIT5,IFITM1,IGFBP5,IL2RA,IRF9,ISG15,ITGA1,LAMC1,LY6E,MGP,MSN,NFKB1,NOS3,NUPR1,OAS1,OAS2,OAS3,OCLN,PARP12,PARP14,PC,PDGFRA,PDLIM4,PDPN,PIM3,PNPT1,RABAC1,RHOG,RSAD2,SAMD9,SAMD9L,SOCS3,STAT1,STAT2,TDRD7,TGFB1,TIMP1,USP…	654 (20)
IFNG	4.402	5.92e-13	ABCC1,ACOD1,ACTB,ADAM17,AGER,AHR,ALPL,ANAPC5,ANKS1A,APOL6,ARG1,BACE1,BATF2,BCL2,BCL3,BRCA2,BTN3A1,BTN3A2,BUB1B,C1QA,C1QB,C5AR1,CALHM6,CAMK4,CARD17,CASP5,CAT,CCL18,CCL23,CCL3L3,CCL5,CCL7,CCL8,CCND3,CCR5,CD14,CD2,CD274,CD38,CEBPA,CEBPB,CEBPD,CFP,CIRBP,CLEC2D,CLEC7A,CMPK2,CORO1A,CRLF1,CSF1R,CSK,CTSH,CXCL10,CXCL6,CYBA,DAXX,DDX58,DDX60,DDX60L,DOK1,DPP4,DRG1,EGR2,EIF2AK2,EIF2AK3,EPOR,ERAP2,ERCC8,ETV7,F…	721 (18)
IFNB1	4.506	8.92e-08	ACOD1,ADAM17,APOL3,APOL6,AXL,BCL2,BTN3A3,CCL5,CCL7,CCR5,CD14,CD274,CD38,CMPK2,CXCL10,CXCL6,DAXX,DDX58,DHX58,EIF2AK2,GBP3,GBP4,GBP5,HERC5,IDO1,IFI16,IFI27,IFI6,IFIH1,IFIT1,IFIT2,IFIT3,IFITM1,IL27,IRF9,ISG15,MX1,NDUFA13,NOTCH1,NUB1,OAS1,OAS2,PARP12,PARP14,PML,PRDM1,PTCH1,RAD51,RASSF1,RIPK2,RSAD2,SLFN13,STAT1,STAT2,STAT4,TIMP1,TLR9,TNFSF10,TRAF6,TRIM38,USP18,XAF1	411 (16)
IFNA2	5.408	2.55e-20	ADAM17,ALOX5,APOL6,BCL2,CCDC92,CCL5,CCL8,CD274,CD28,CD69,CMPK2,CXCL10,DDX58,DDX60,DNAJB2,DPP4,EIF2AK2,GBP1,GBP4,GPATCH11,HERC5,HERC6,HIF1A,HSH2D,IDO1,IFI16,IFI27,IFI35,IFI44,IFI44L,IFI6,IFIH1,IFIT1,IFIT2,IFIT3,IFIT5,IFITM1,IFITM2,IFITM3,IFNAR2,IL12RB2,IL2RA,IRF9,ISG15,KDM5A,LILRB2,LY6E,MAP2K1,MT-ATP6,MTOR,MX1,NOS3,OAS1,OAS2,OAS3,PARP12,PARP9,PHF11,PML,PPP1CA,PTTG1,RASSF1,RETREG2,RSAD2,SAMD9,SOCS3…	619 (18)
IFNL1	6.012	5.98e-22	APOL6,CMPK2,CXCL10,DDX58,DDX60,DDX60L,EIF2AK2,GBP1,GBP5,GPATCH11,HERC5,HERC6,IFI27,IFI35,IFI44,IFI44L,IFI6,IFIH1,IFIT1,IFIT2,IFIT3,IFIT5,IFITM1,IFITM2,IFITM3,IRF9,ISG15,MX1,OAS1,OAS2,OAS3,PHF11,PML,PSMB9,RSAD2,RTP4,SAMD9,STAT1,STAT2,TDRD7,TRIM22,UBE2L6,USP18,XAF1,ZC3HAV1	684 (17)

## Sheet: VAP_vs_NOVAP_EarlyTime
Upstream Regulator_Cytokine	Activation z-score	p-value of overlap	Target Molecules in Dataset	Mechanistic Network
IL18	-3.072	0.282	ACTA1,AQP3,CCL2,CCR5,CD226,CD244,CDH1,CSF2,FASLG,GADD45G
SPP1	-3.026	0.0382	BCL2L11,CA2,CCL15,CCL2,CCS,CD163,CDH1,CXCL6,DSP,ERBB2
CSF1	-2.657	0.00384	APOE,BCL2L11,CCL2,CCR5,CD163,CD163L1,CD68,CEBPA,CTSD,CTSH	947 (16)
IL15	-2.481	0.0149	AQP3,ARNT,BBC3,BCL2L11,BPGM,BRK1,CALM1 (includes others),CCL2,CD226,CD244
C5	-2.356	0.331	C5,CCL2,CD63,CDH11,CSF2,CYBB,DAG1,F3,FASLG,FCGR2B
TNFSF15	-2.219	0.496	CSF2,HAMP,IL2RB,LAMP1,MMP9
TNFSF11	-2.177	0.00819	AEBP2,ATP6V0D2,CA2,CAV1,CCL2,CEBPA,CKB,CLOCK,CYP1A1,DAB2	923 (16)
CCL2	-2.133	0.0793	CCL2,CEBPA,CEBPB,F3,FASLG,FOLR2,IGF1,ITGA5,ITGAL,LAMP1
TNFSF12	-2.056	1	BCL2L2,CCL2,CCR5,CD68,CSF2,CXCL6,DLL1,MMP1,MMP10,MMP9
EDN1	-2	0.00442	ACTA1,AREG,ARHGEF11,CCL2,CDH1,CDK1,CTNND1,CYBB,EDNRA,ENAH	998 (16)
IFNE	2.155	0.119	HERC5,ISG20,PLAAT4,PTGER2,SLC2A1,SLC7A2,TLR3,TRIM5,USP18
IFNA1/IFNA13	2.18	0.536	CYP1A1,CYP3A5,MX1,OAS2,PLAAT4,STAT2,TLR3,VEGFB
SCGB1A1	2.186	0.145	FASLG,ITGB2,MMP14,MMP2,MMP9
IFNA2	2.636	0.165	BAG3,C1R,CAV1,CCL2,CD70,CXCR3,DDX56,DIABLO,EPB41L3,FGF2
IFNB1	2.996	0.0743	BTN3A3,CCL2,CCR5,CDKL2,COL12A1,CSF2,CXCL6,CYP1A1,CYP3A5,DLL1
IFNL1	3.527	0.271	F2R,GPATCH11,HERC5,HERC6,IRF9,ISG20,MX1,OAS2,OASL,PLAAT4

## Sheet: VAP_vs_NOVAP_LateTime
Upstream Regulator_Cytokine	Activation z-score	p-value of overlap	Target Molecules in Dataset	Mechanistic Network
IL13	-2.39	0.0724	ACKR3,ADAM28,ALOX15,AMPD2,ARG1,BATF,BAX,BCL2L1,BCL3,BID
IL25	-2.213	1	CCL17,CCL5,IL17RB,KDR,PLIN2,ZFP36L1
WNT1	-2.106	0.189	ACTA2,BIRC5,CCN4,CD24,CDH1,CDKN2A,CSNK2A2,DHFR,DKK1,E2F4
IL27	2.007	1	CCL5,CD14,CD163,FOS,GBP2,HLA-E,HPGD,IRF1,ITGAM,NFATC1
IFNB1	2.101	0.15	APOL6,BCL2L1,CCL5,CD14,CDKL2,CYP1A1,CYP3A5,DDX58,DEFB1,F2R
TNFSF10	2.168	0.462	ANGPT1,BAX,BCL2L1,BID,BIRC5,CD14,CSE1L,EGFR,FOS,FTH1
IL11	2.202	0.41	ACTA2,ANXA2,BCL2L1,FABP4,FOS,GP5,IRF1,JUNB,MMP13,SOCS3
TNFSF11	2.246	0.0857	AHRR,BCL2L1,C3AR1,CCL3L3,CCL5,CCR1,CCR4,CD14,CREBRF,CYP1A1
IFNA4	2.646	1	AP1S3,GBP2,GBP5,HLA-E,IFIH1,IFIT2,PIK3AP1
PRL	2.715	7.03e-06	ABCG2,ACTB,ADAR,AKR1C3,ANXA2,APP,ARF3,BCL2L1,BOK,CDH1	1111 (19)
CSF3	3.557	0.0223	ARG1,BATF,BAX,BCL2L1,BIRC5,C3AR1,CAPG,CCL3L3,CCL5,CCR7
IFNL1	4.033	0.00146	APOL6,CCR7,DDX58,DDX60,F2R,GBP1,GBP5,IFI35,IFIH1,IFIT2	865 (12)
IFNG	4.634	0.00231	ABCD3,ACTA2,ACTB,ADAMTS9,ADCY7,ADIPOQ,ADM,AGER,AIF1L,ALDH1A3	968 (15)
IFNA2	4.853	0.000231	ALOX5,APOL6,ARL5A,ATF5,BAX,BIRC5,CCL5,CDKN2A,CDKN2B,CNP	984 (16)

## Sheet: VAP_EarlyTime_vs_LateTime
Upstream Regulator_Cytokine	Activation z-score	p-value of overlap	Target Molecules in Dataset	Mechanistic Network
IFNL1	-3.795	0.0432	CMPK2,CXCL9,HERC5,HERC6,IFI44,IFI44L,IFIT1,IFIT5,ISG15,ISG20
IFNB1	-3.721	0.426	AMH,BHLHE40,BTN3A3,CCR5,CD14,CDKL2,CMPK2,COL12A1,CTSK,CX3CL1
IFNA2	-3.357	0.171	ATF5,CD70,CMPK2,CXCL9,EFNB3,HERC5,HERC6,HSH2D,IFI27L2,IFI44
IFNA1/IFNA13	-2.911	0.348	AR,CXCL9,CYP1A1,IFIT1,ISG15,MX1,OAS1,OAS2,PLAAT4,VEGFB
IFNL4	-2.418	0.00688	IFIT1,ISG15,MX1,OAS1,OAS2,OASL
WNT3A	-2.293	0.000338	ADGRF1,ALDH1A3,AQP3,ATP1B1,AXIN2,BDNF,CCDC80,CCN1,CCN2,CCND1	946 (17)
TNFSF11	2.135	0.011	ACP5,CCND1,CD14,CEBPA,CSF1R,CTSK,CXCL3,CYP1A1,DAB2,DMPK
TNFSF15	2.219	1	HAMP,IL2RB,LAMP1,LEP,MMP9
IL3	2.361	0.268	AKR1A1,ARG1,ARHGAP29,ARHGEF1,ATF5,C1QA,CCN3,CCND1,CCR3,CD14
IL2	2.363	0.083	ACVR1B,ARAP1,ARHGAP32,ARHGAP8/PRR5-ARHGAP8,ARHGEF12,ARHGEF7,ATF5,BBC3,BHLHE40,CAPG
CSF1	2.513	0.00806	ACP5,APOE,ARG1,CCND1,CCR5,CD163,CD163L1,CD68,CD74,CEBPA	1104 (15)
CSF3	2.57	0.24	ARG1,CAPG,CD14,CEBPA,CEBPB,CEBPE,CTLA4,CTSD,CXCL3,CXCR4
SPP1	2.648	0.0197	ARG1,CCL15,CD163,CDH1,CXCL3,CXCL6,CYP39A1,DSP,EGFR,ERBB2
IL18	2.934	1	AQP3,CCR5,CD244,CDH1,CXCL3,CXCL9,GADD45G,GNA15,HAVCR2,IL12RB1

## Sheet: NOVAP_EarlTime_vs_LateTime
Upstream Regulator_Cytokine	Activation z-score	p-value of overlap	Target Molecules in Dataset	Mechanistic Network
IFNA2	-6.11	1.58e-29	ADGRE1,ANXA1,ARL5A,BAG3,C1R,CCL5,CD86,CMPK2,CXCL9,DDX58,DDX60,DIABLO,EIF2AK2,GBP1,GEM,HBEGF,HERC5,HERC6,HLA-E,HSH2D,HSPA6,IFI27,IFI35,IFI44,IFI44L,IFIH1,IFIT1,IFIT2,IFIT3,IFIT5,IFITM1,IFITM3,IRF1,ISG15,LY6E,MAL,MAP2K1,MT-CO2,MT1F,MT1G,MT1X,MX1,OAS1,OAS2,OAS3,OGFR,PARP12,PARP9,PML,PTAFR,REC8,RSAD2,SAMD9,SEPTIN4,SHFL,SP100,SP110,TAP1,TGM2,TNFSF10,TRIM21,TRIM22,UBA7,UBE2L6,USP18,VCAM1,XAF1	293 (17)
IFNL1	-5.552	9.64e-25	CMPK2,CXCL9,DDX58,DDX60,EIF2AK2,F2R,GBP1,HERC5,HERC6,IFI27,IFI35,IFI44,IFI44L,IFIH1,IFIT1,IFIT2,IFIT3,IFIT5,IFITM1,IFITM3,ISG15,MLKL,MX1,OAS1,OAS2,OAS3,PML,RSAD2,SAMD9,SHFL,SP100,SP110,STAT2,TRIM22,UBE2L6,USP18,XAF1	396 (18)
IFNB1	-4.064	4.12e-12	ACOD1,APOL2,CASP1,CCL5,CD86,CH25H,CMPK2,CTSK,CX3CL1,CXCL9,DDX58,DHX58,EIF2AK2,F2R,GPC4,HERC5,IFI27,IFIH1,IFIT1,IFIT2,IFIT3,IFITM1,IRF1,ISG15,LAMB1,MX1,OAS1,OAS2,PARP12,PARP14,PDK4,PML,PTCH1,PTGS2,RSAD2,SPP1,SPRY1,SPRY2,STAT2,THBS1,TIMP1,TNFSF10,TRIM21,UBA7,UBE2E2,USP18,VCL,XAF1	241 (15)
IFNA1/IFNA13	-3.477	7.46e-12	CD86,CXCL9,DHX58,EIF2AK2,GEM,IFI27,IFIH1,IFIT1,IFIT2,IFITM1,IRF1,ISG15,MX1,OAS1,OAS2,PTGS2,RSAD2,SIGLEC1,STAT2,UBE2L6	389 (20)
IFNL4	-2.802	6.33e-08	DDX58,DHX58,IFIH1,IFIT1,ISG15,MX1,OAS1,OAS2	198 (9)
IFNA4	-2.7	1.12e-05	AP1S3,CD86,CXCL9,HLA-E,IFIH1,IFIT1,IFIT2,ISG15,MX1,PIK3AP1,RSAD2,USP18	375 (19)
PRL	-2.507	2.7e-18	A2M,ABCG2,ADAR,AKR1C3,ANXA2,CMPK2,CXCL9,DDX58,DHX58,DNAJA4,DTX3L,ECM1,EIF2AK2,EPSTI1,FN1,GPNMB,HELZ2,HERC5,HERC6,IFI35,IFI44,IFI44L,IFIH1,IFIT1,IFIT3,IFIT5,IFITM1,IGFBP5,IRF1,ISG15,ITGA1,LY6E,MGP,MLKL,OAS1,OAS2,OAS3,PARP12,PARP14,PDK4,PLCD1,REC8,RSAD2,SAMD9,SAMD9L,SHFL,SHISA5,SP100,SP110,SPARC,SPP1,STAT2,TECR,TIMP1,USP18,VIM,XAF1	389 (22)
IFNG	-2.151	2.65e-21	A2M,ACOD1,ADAMTS8,AIM2,AREG,ARNT2,BATF2,BMP6,BTN3A1,C1R,C3,CASP1,CASP5,CCL17,CCL18,CCL22,CCL5,CCR1,CD163,CD276,CD74,CD86,CH25H,CHRNE,CMPK2,CSF1,CTSK,CX3CL1,CXCL9,CYP24A1,DDX58,DDX60,DIABLO,DRG1,DTX3L,EEF1A1,EIF2AK2,ETV7,F2R,FABP5,FBP1,FCER2,FCGR1A,FFAR1,FLT1,FN1,FOXP3,FZD1,GAD1,GBP1,GNL1,HBEGF,HERC6,HLA-DOA,HLA-DQA1,HLA-DQB1,HLA-DRA,HLA-DRB1,HLA-DRB5,HLA-E,HMGB1,HSPA1A/HSPA1B,HSPA1L,IFI27,IFI35,I…	421 (19)
TNFSF10	-2.026	0.00293	ANGPT1,DIABLO,EIF2AK2,IFI27,IFIT1,IFITM1,ISG15,PTGS2,RCAN1,SERPINH1,SP100,TIMP1,TNFSF10	324 (17)
LTA	2.236	0.185	FOXP3,HDC,ITGB1,PTGS2,VCAM1
IL25	2.415	0.117	CCL17,CCL24,CCL5,FLT1,IL17RB,IL1RL1
CCL11	2.433	0.0868	BMP6,CCL18,CXCL9,ITGA1,ITGB1,PPBP
CCL5	2.474	0.00818	ALCAM,CCL5,CCR1,CD163,EMP1,F2R,HDC,OLR1,PNP,THBS1	346 (17)
SPP1	2.497	0.00465	ABCG2,ANGPT1,CCL18,CCL5,CCS,CD163,FN1,FOXRED1,MMP7,PIK3R1,PPARG,PTGS2,RUNX2,SERPINE1,SNAI1,SPP1,TERT,TIMP1,VIM	422 (20)
IL1RN	2.755	3.86e-14	BTN3A1,DDX58,EIF2AK3,GBP1,HERC6,HLA-DQB1,IFI27,IFI44,IFI44L,IFIH1,IFIT3,IFIT5,IGFBP5,IRF1,KCTD7,MX1,NTRK1,OAS1,OAS2,OAS3,PML,PTGS2,RSAD2,S100A9,SAMD9,SERPINE1,SP100,SPP1,STAT2,TIMP1,TNFSF10,TRIM22,USP18	327 (17)
IL3	2.881	0.000766	ADGRE1,APBA2,AREG,CCL17,CCN3,CD1A,CD48,CD86,CITED2,CSF1,CXCL9,EEF1A1,EIF2AK2,F2R,FCER2,FGFR1,GATA2,HBEGF,IL17RB,IL1RL1,IL3RA,IMPDH2,KIF1B,NRP1,RALA,RAN,RPL4,RPL7,RPS14,TERT,TNFSF10,VCAM1,YBX1	391 (22)
IL5	3.167	0.0217	A2M,ACAA2,ACP5,AICDA,ANXA2,AREG,CCL22,CCNH,CCR1,CITED2,EGLN1,ELL2,HBEGF,HSPA6,HSPH1,IL1RL1,IL3RA,LIMK2,MMD,NDRG1,PMP22,SPN,ST7,VIM
EDN1	3.279	0.00108	ANXA1,AREG,COL4A1,EREG,FN1,HBEGF,HEY1,ITGB1,MAP2K1,MMP7,NPPB,OLR1,PTGS2,SERPINE1,SLC1A2,TGM2,THBS1,TIMP1,TIMP3,VCAM1,VCL,VIM	420 (20)
CSF1	3.6	0.000139	ACP5,APOE,CCL5,CCR1,CD163,CD1A,CD74,CSF1,CTSK,ETV3,F2R,FN1,GPNMB,IL1RL1,IRF4,ITGB1,LPL,MMP12,MRC1,MSR1,PPARG,SIGLEC1,SLC29A1,SPARC,SPP1,THBS1,TLR5,TNFRSF1B,VCAM1	428 (20)
CSF2	3.979	5.64e-09	ACP5,ANXA1,C3,CASP1,CCL17,CCL18,CCR1,CD163,CD1A,CD1C,CD207,CD276,CD74,CD86,CDKN2C,CKS1B,CSF1,CSNK2A2,F2R,FCGR1A,FFAR2,FLT1,FOXP3,GLB1,HBEGF,HDC,HILPDA,HLA-DQB1,HMGB1,HSPH1,IFITM3,IL15,IL1RL1,IL3RA,IRF4,KIF11,MED14,MKI67,MMD,MRC1,NLRP3,NR4A2,NR4A3,NRP1,OLR1,OSMR,PLAGL2,PMP22,PPARG,PTGS2,REC8,RGCC,SLC11A2,SLC2A4,SPP1,TERT,TGFBI,TGM2,THBS1,TLR5,TNFRSF1B,TPX2	414 (19)
IL13	4.68	5.64e-14	ACKR3,BATF,BPIFA1,C3,C3AR1,CASP1,CCL17,CCL18,CCL22,CCL24,CCL5,CD163,CD1A,CD1C,CD1E,CD37,CD48,CD52,CD86,CHI3L1,CTSK,CX3CL1,ENPP2,EQTN,FABP4,FCER2,FCGR1A,FEZ1,GPNMB,HDC,HLA-DRB5,IL17RB,IL1RL1,IL3RA,KLK6,LIPA,LTA4H,MAP2K6,MATK,MMP10,MMP12,MRC1,MT1X,MUC22,MUC5B,MYOG,PDGFC,PHLDA1,PPARG,PPARGC1A,PTGS2,RFTN1,RIN2,RORC,SEPTIN11,SERPINE1,SLC26A4,SLPI,SPP1,TGM2,THBS1,TIMP1,TNFRSF1B,VCAM1,VNN1	392 (17)
IL4	5.899	7.61e-16	ACOD1,ACP5,ADGRE1,AHCYL1,AICDA,ANXA1,ANXA2,APOE,BPIFA1,C3,CAMK1D,CAND1,CCL17,CCL18,CCL22,CCL24,CCL5,CD163,CD1A,CD1C,CD276,CD300A,CD74,CD86,CITED2,CMPK2,CRADD,CRLF2,CSF1,CTSK,CX3CL1,CXCL9,DCSTAMP,DHX58,DOCK10,EEA1,EGLN1,EIF2AK2,EVI5,F2R,FABP4,FCER2,FLT1,FN1,FOXP3,GPM6B,HBEGF,HSH2D,HSPA1A/HSPA1B,IFI44,IFI44L,IFIH1,IFIT3,IFITM3,IGF2R,IL15,IL17RB,IL1RL1,IL3RA,INPP1,IRF1,IRF4,ISG15,ITGA1,ITGAL,ITGB1,K…	393 (19)
