# Supplementary material for: Impaired immune signaling and changes in the lung microbiome precede secondary bacterial pneumonia in COVID-19
Source: Res Sq. 2021 Apr 23:rs.3.rs-380803. Preprint. [Version 1] doi: 10.21203/rs.3.rs-380803/v1 (PMC8132240; doi:10.21203/rs.3.rs-380803/v1)
Supplement: Supplement 6 [file 91392bb935b62ae35f6ad95a.xlsx]

## Sheet: MonoMac_VAP_vsNOVAP_EarlyTime
	gene	log2FC	pval	Pval_clean	qval
0	FAM138A	0.00448274	0.357094	0.357094	0.500532
1	AL627309.1	-0.00436134	0.602368	0.602368	0.720196
2	AL627309.2	-0.0140674	0.000446396	0.000446396	0.00181685
3	AL669831.5	-0.0398387	0.0113803	0.0113803	0.0317265
4	FAM87B	0.0133488	0.0885448	0.0885448	0.174486
5	LINC00115	-0.00641563	0.816941	0.816941	0.881654
6	FAM41C	-0.0321846	0.00999593	0.00999593	0.0284752
7	NOC2L	0.0203024	0.510537	0.510537	0.643888
8	KLHL17	-0.000479754	0.977674	0.977674	0.986704
9	PLEKHN1	-0.0473884	0.00552206	0.00552206	0.017081
10	AL645608.8	-0.0840242	5.02391e-08	5.02391e-08	3.54797e-07
11	HES4	0.130025	1.61223e-05	1.61223e-05	8.44156e-05
12	ISG15	0.0202882	0.51042	0.51042	0.64385
13	AL645608.2	-0.0113563	0.0430316	0.0430316	0.0976185
14	AGRN	0.0331264	0.296151	0.296151	0.439635
15	AL645608.9	-0.0295958	0.0492919	0.0492919	0.109148
16	RNF223	0.00241591	0.378001	0.378001	0.520982
17	C1orf159	-0.0520645	0.0124314	0.0124314	0.0342484
18	AL390719.2	-0.00672666	9.94076e-15	9.94076e-15	1.08154e-13
19	TTLL10	-0.00827904	6.36336e-06	6.36336e-06	3.5263e-05
20	TNFRSF18	-0.017988	0.458227	0.458227	0.596859
21	TNFRSF4	-0.0584267	0.0304725	0.0304725	0.0733396
22	SDF4	0.0308029	0.357807	0.357807	0.501137
23	B3GALT6	-0.0224939	0.456744	0.456744	0.595391
24	C1QTNF12	-0.00671928	0.534241	0.534241	0.664488
25	AL162741.1	-0.00619955	0.385659	0.385659	0.528494
26	UBE2J2	0.0810653	0.00972731	0.00972731	0.0278125
27	SCNN1D	0.0144612	0.132481	0.132481	0.239146
28	ACAP3	-0.0681497	0.00384279	0.00384279	0.0124357
29	PUSL1	0.0149222	0.562526	0.562526	0.688635
30	INTS11	0.00656437	0.823112	0.823112	0.886443
31	CPTP	0.0114384	0.600629	0.600629	0.719091
32	TAS1R3	0.00499555	0.366991	0.366991	0.510215
33	DVL1	-0.0993129	0.000147525	0.000147525	0.000662082
34	MXRA8	-0.00162619	0.615303	0.615303	0.7303
35	AURKAIP1	0.131013	4.66879e-05	4.66879e-05	0.000228063
36	CCNL2	-0.0774043	0.00504987	0.00504987	0.0158249
37	MRPL20	-0.0825069	0.00790612	0.00790612	0.0232387
38	AL391244.3	-0.00830505	0.116095	0.116095	0.21597
39	ANKRD65	-0.00641219	6.89602e-09	6.89602e-09	5.28195e-08
40	AL391244.2	-0.00385131	7.13182e-98	1e-30	2.49378e-96
41	LINC01770	0.00929348	1.06757e-06	1.06757e-06	6.52815e-06
42	VWA1	-0.0056687	3.47132e-190	1e-30	9.43168e-188
43	ATAD3C	-0.000614104	0.865782	0.865782	0.916606
44	ATAD3B	-0.0797474	0.0017714	0.0017714	0.00625937
45	ATAD3A	-0.0684647	0.00145414	0.00145414	0.00524713
46	SSU72	0.191183	1.59972e-09	1.59972e-09	1.29589e-08
47	AL645728.1	-0.0457741	0.00664625	0.00664625	0.0200224
48	FNDC10	-0.0238263	0.231503	0.231503	0.366043
49	AL691432.2	-0.0148807	0.555008	0.555008	0.68234
50	MIB2	-0.0418563	0.0487099	0.0487099	0.108133
51	MMP23B	-0.00766782	0.00392833	0.00392833	0.0126717
52	CDK11B	-0.0145885	0.600519	0.600519	0.719046
53	FO704657.1	-0.0301118	0.0417661	0.0417661	0.0953069
54	SLC35E2B	0.0462095	0.0676836	0.0676836	0.14086
55	CDK11A	-0.132727	3.4014e-07	3.4014e-07	2.21825e-06
56	SLC35E2A	-0.0146298	0.42567	0.42567	0.567599
57	NADK	-0.169428	1.9761e-12	1.9761e-12	1.93434e-11
58	GNB1	-0.168884	1.35646e-08	1.35646e-08	1.01689e-07
59	AL109917.1	0.0115373	0.0976723	0.0976723	0.188573
60	TMEM52	0.0075892	0.473243	0.473243	0.610407
61	CFAP74	-0.00498741	0.00759583	0.00759583	0.0224762
62	PRKCZ	-0.0186785	0.0643357	0.0643357	0.135236
63	AL590822.2	-0.0125631	7.57802e-11	7.57802e-11	6.75371e-10
64	PRKCZ-AS1	0.00161749	0.665875	0.665875	0.770049
65	FAAP20	0.0532601	0.0926688	0.0926688	0.180928
66	SKI	-0.108261	3.30158e-06	3.30158e-06	1.89987e-05
67	MORN1	0.0196773	0.21874	0.21874	0.350604
68	RER1	0.278299	8.48517e-16	8.48517e-16	9.72096e-15
69	PEX10	0.015442	0.553454	0.553454	0.681171
70	PLCH2	0.0179352	7.27505e-184	1e-30	8.40644e-182
71	PANK4	-0.0234674	0.320783	0.320783	0.464626
72	AL139246.5	-0.198362	5.46048e-27	5.46048e-27	8.87538e-26
73	TNFRSF14-AS1	-0.0867717	1.74447e-05	1.74447e-05	9.08425e-05
74	TNFRSF14	-0.26222	1.47224e-25	1.47224e-25	2.31982e-24
75	AL139246.3	-0.0441928	4.51755e-06	4.51755e-06	2.55787e-05
76	FAM213B	-0.0613231	0.00979867	0.00979867	0.0279966
77	MMEL1	-0.00557315	0.660352	0.660352	0.765691
78	TTC34	0.0138899	0.245427	0.245427	0.381843
79	PRDM16	-0.00404747	0.530727	0.530727	0.661175
80	AL590438.1	0.00266717	0.629817	0.629817	0.742061
81	ARHGEF16	-0.0162594	0.00031154	0.00031154	0.0013096
82	MEGF6	-0.0122967	0.123451	0.123451	0.226573
83	AL513320.1	0.0162053	0.00194765	0.00194765	0.00681271
84	TPRG1L	-0.00225812	0.934934	0.934934	0.961081
85	WRAP73	0.159526	1.33196e-06	1.33196e-06	8.04329e-06
86	TP73	0.0109096	0.0348178	0.0348178	0.0818481
87	SMIM1	-0.0136343	0.205093	0.205093	0.33376
88	LRRC47	0.0237419	0.367638	0.367638	0.510904
89	CEP104	0.0587577	0.0273888	0.0273888	0.0670497
90	DFFB	0.0467983	0.0285051	0.0285051	0.06931
91	C1orf174	0.108308	0.000433153	0.000433153	0.00176581
92	LINC01134	-0.00485518	0.624737	0.624737	0.737965
93	LINC01345	-0.00516676	2.45379e-09	2.45379e-09	1.95545e-08
94	AL365255.1	0.00401332	2.14394e-79	1e-30	6.47237e-78
95	NPHP4	0.00841032	0.694392	0.694392	0.79102
96	KCNAB2	-0.0502859	0.0773847	0.0773847	0.156939
97	RPL22	0.186159	1.3986e-09	1.3986e-09	1.13847e-08
98	AL031847.1	0.00761402	0.117681	0.117681	0.218436
99	RNF207	0.00611275	0.371664	0.371664	0.514541
100	ICMT	0.123227	1.20253e-05	1.20253e-05	6.42007e-05
101	LINC00337	0.00306801	0.250831	0.250831	0.388118
102	GPR153	-0.0109745	0.496329	0.496329	0.631075
103	ACOT7	0.170005	4.6879e-08	4.6879e-08	3.32427e-07
104	AL031848.2	0.00408794	0.774703	0.774703	0.850599
105	HES2	0.00689478	0.522286	0.522286	0.653611
106	ESPN	0.00125705	1.56824e-82	1e-30	4.84348e-81
107	TNFRSF25	0.0354144	6.37309e-10	6.37309e-10	5.33905e-09
108	PLEKHG5	0.00554401	4.38175e-126	1e-30	1.91105e-124
109	NOL9	0.0245352	0.331233	0.331233	0.474411
110	ZBTB48	0.0088863	0.752237	0.752237	0.834132
111	KLHL21	-0.247214	4.17291e-26	4.17291e-26	6.65349e-25
112	PHF13	-0.0288179	0.178501	0.178501	0.300506
113	THAP3	-0.0247316	0.296497	0.296497	0.440083
114	DNAJC11	0.0110642	0.691772	0.691772	0.789061
115	CAMTA1-DT	-0.0108202	0.10293	0.10293	0.196144
116	CAMTA1	-0.0668384	0.0369729	0.0369729	0.0860191
117	VAMP3	-0.124614	0.00012387	0.00012387	0.000563508
118	PER3	-0.0262107	0.210518	0.210518	0.340657
119	Z98884.1	-0.0781973	7.44892e-05	7.44892e-05	0.000351898
120	UTS2	0.122171	7.97657e-07	7.97657e-07	4.95602e-06
121	TNFRSF9	-0.0643607	0.0179583	0.0179583	0.0468257
122	PARK7	0.271602	6.19345e-15	6.19345e-15	6.80095e-14
123	AL034417.4	0.0052461	0.525569	0.525569	0.656475
124	AL034417.3	0.00102704	0.867165	0.867165	0.917438
125	ERRFI1	0.0114932	0.562914	0.562914	0.688901
126	AL034417.2	-0.0033913	0.666321	0.666321	0.770455
127	SLC45A1	0.0344204	0.0121991	0.0121991	0.0336768
128	RERE	0.112275	0.000363121	0.000363121	0.0015069
129	AL096855.1	-0.00817454	0.0631427	0.0631427	0.133253
130	ENO1	0.214486	6.42723e-10	6.42723e-10	5.38217e-09
131	ENO1-AS1	-0.0258638	0.0417879	0.0417879	0.0953146
132	SLC2A5	0.0851468	0.00197812	0.00197812	0.00690606
133	GPR157	-0.0981492	0.000867384	0.000867384	0.00331111
134	MIR34AHG	0.00340834	0.87484	0.87484	0.922851
135	LINC01759	0.000716077	0.949966	0.949966	0.970612
136	H6PD	-0.055212	0.0748316	0.0748316	0.152949
137	SPSB1	0.032329	0.310241	0.310241	0.454048
138	SLC25A33	-0.0678149	0.0111767	0.0111767	0.0312544
139	TMEM201	-0.00485624	0.710981	0.710981	0.803376
140	PIK3CD	0.020299	0.325608	0.325608	0.469027
141	PIK3CD-AS1	0.000752315	0.840836	0.840836	0.899343
142	PIK3CD-AS2	0.0136226	0.327295	0.327295	0.470547
143	CLSTN1	-0.0294868	0.195768	0.195768	0.322527
144	CTNNBIP1	0.20467	4.49466e-09	4.49466e-09	3.48917e-08
145	LZIC	0.118677	0.000835446	0.000835446	0.00320318
146	NMNAT1	0.00608741	0.817393	0.817393	0.882011
147	RBP7	0.140327	0.000174363	0.000174363	0.000771338
148	UBE4B	-0.064807	0.0245534	0.0245534	0.0609845
149	KIF1B	-0.0833989	0.00781146	0.00781146	0.023012
150	AL139424.3	-0.00262609	0.619109	0.619109	0.733302
151	AL139424.2	-0.0196528	0.0793803	0.0793803	0.160002
152	PGD	0.19876	4.58366e-09	4.58366e-09	3.55552e-08
153	AL139424.1	0.0116751	1.41852e-05	1.41852e-05	7.49164e-05
154	CENPS-CORT	-0.0051617	0.755911	0.755911	0.836742
155	CENPS	0.0226778	0.155857	0.155857	0.271265
156	CORT	0.00870337	0.00111808	0.00111808	0.00415195
157	DFFA	0.0507691	0.117266	0.117266	0.217766
158	PEX14	-0.00630704	0.787177	0.787177	0.860396
159	CASZ1	-0.0247659	0.116	0.116	0.215933
160	AL139423.1	-0.000409061	0.920624	0.920624	0.952017
161	C1orf127	0.0032441	0.700887	0.700887	0.795386
162	TARDBP	-0.0292616	0.353593	0.353593	0.496948
163	MASP2	0.0197855	0.00738293	0.00738293	0.0219458
164	AL109811.3	-0.014187	0.323639	0.323639	0.467194
165	SRM	0.155451	1.32734e-05	1.32734e-05	7.03414e-05
166	EXOSC10	-0.0126306	0.672288	0.672288	0.77457
167	AL109811.1	-0.00718023	0.0279685	0.0279685	0.0682055
168	AL109811.2	0.0214108	0.017805	0.017805	0.0464846
169	MTOR	-0.0222525	0.438557	0.438557	0.579535
170	UBIAD1	0.024995	0.370731	0.370731	0.51378
171	DISP3	0.0124436	3.90936e-06	3.90936e-06	2.23046e-05
172	FBXO2	0.00721209	0.22697	0.22697	0.360833
173	FBXO44	0.0247051	0.206019	0.206019	0.334915
174	FBXO6	0.0897462	0.00892145	0.00892145	0.0258093
175	MAD2L2	-0.0171332	0.601091	0.601091	0.719335
176	DRAXIN	0.00303795	0.734859	0.734859	0.821842
177	AGTRAP	0.103829	0.0011105	0.0011105	0.00412866
178	C1orf167	-0.0046478	0.456998	0.456998	0.595683
179	MTHFR	-0.123196	1.23563e-05	1.23563e-05	6.58632e-05
180	CLCN6	-0.0974383	0.000156311	0.000156311	0.00069716
181	NPPA-AS1	-0.0158328	0.428747	0.428747	0.570357
182	NPPA	3.29091e-05	0.992012	0.992012	0.995879
183	KIAA2013	0.00318329	0.91942	0.91942	0.951163
184	PLOD1	-0.00158971	0.963125	0.963125	0.97885
185	MFN2	-0.0479201	0.0696129	0.0696129	0.14404
186	MIIP	-0.00572176	0.860635	0.860635	0.913518
187	TNFRSF8	-0.0537386	0.0111002	0.0111002	0.0310959
188	TNFRSF1B	-0.332725	7.3502e-32	1e-30	1.32185e-30
189	VPS13D	-0.0818169	0.000271963	0.000271963	0.00115923
190	DHRS3	-0.00218458	0.942293	0.942293	0.965585
191	AC254633.1	0.0148165	0.397228	0.397228	0.539567
192	C1orf158	0.000391932	4.10523e-16	4.10523e-16	4.76833e-15
193	PDPN	0.14679	8.53823e-06	8.53823e-06	4.66874e-05
194	PRDM2	-0.110408	2.27374e-06	2.27374e-06	1.33049e-05
195	KAZN	-0.0195771	0.0081558	0.0081558	0.0238448
196	TMEM51-AS1	0.0375891	0.0296958	0.0296958	0.0717302
197	TMEM51	-0.0744972	0.0366942	0.0366942	0.0854633
198	FHAD1	0.0168092	0.406495	0.406495	0.548486
199	AL031283.2	0.000500198	0.923519	0.923519	0.953735
200	AL031283.1	-0.0368511	0.00100922	0.00100922	0.00378995
201	EFHD2	-0.129138	1.36754e-05	1.36754e-05	7.23385e-05
202	CTRC	-0.0635276	0.000208739	0.000208739	0.000909602
203	CELA2A	-0.00155675	0.800067	0.800067	0.869427
204	CELA2B	0.00962053	0.300041	0.300041	0.443401
205	CASP9	-0.0888894	0.000982201	0.000982201	0.00369331
206	DNAJC16	0.0197521	0.425016	0.425016	0.567045
207	AGMAT	0.0329873	0.000519457	0.000519457	0.00209261
208	AL121992.1	-0.00656878	0.479875	0.479875	0.616469
209	DDI2	-0.0641946	0.0213228	0.0213228	0.0541092
210	AL121992.2	-0.00244046	0.895881	0.895881	0.937033
211	PLEKHM2	-0.276705	1.5176e-21	1.5176e-21	2.13976e-20
212	SLC25A34	-0.0281303	0.309211	0.309211	0.453096
213	FBLIM1	-0.0114742	0.281031	0.281031	0.422492
214	UQCRHL	-0.120225	9.54015e-10	9.54015e-10	7.87092e-09
215	AL450998.2	-0.0996332	0.000402352	0.000402352	0.0016513
216	SPEN	-0.0983675	0.000837581	0.000837581	0.00320904
217	ZBTB17	-0.14379	1.23715e-06	1.23715e-06	7.50123e-06
218	HSPB7	0.0163013	0.005471	0.005471	0.0169439
219	CLCNKB	-0.00617117	9.62306e-33	1e-30	1.76857e-31
220	FAM131C	0.00849033	2.46863e-191	1e-30	2.77777e-188
221	EPHA2	-0.0107787	0.00908424	0.00908424	0.0262312
222	AL451042.2	-0.00985813	0.00314258	0.00314258	0.010399
223	ARHGEF19	-0.00584195	0.571228	0.571228	0.69573
224	CPLANE2	0.0097195	0.427194	0.427194	0.569082
225	FBXO42	-0.0130838	0.660673	0.660673	0.765751
226	SZRD1	-0.146602	3.9943e-06	3.9943e-06	2.2757e-05
227	SPATA21	0.00474556	0.54453	0.54453	0.673577
228	NECAP2	0.0235376	0.463671	0.463671	0.601625
229	LINC01772	-0.0323359	0.00621166	0.00621166	0.0188886
230	AL137802.2	-0.00427136	0.486128	0.486128	0.621969
231	NBPF1	0.0027992	0.906796	0.906796	0.943199
232	AL137798.2	-0.00151607	0.639327	0.639327	0.749364
233	CROCC	-0.0115501	0.269894	0.269894	0.410104
234	BX284668.5	-0.0719832	0.0414207	0.0414207	0.0946585
235	BX284668.6	-0.044062	6.05638e-05	6.05638e-05	0.000290342
236	MFAP2	0.00570011	3.70703e-50	1e-30	8.54744e-49
237	ATP13A2	-0.0838484	0.000384742	0.000384742	0.00158517
238	SDHB	0.142918	4.01639e-05	4.01639e-05	0.000198461
239	PADI2	-0.12422	2.42665e-11	2.42665e-11	2.23501e-10
240	PADI1	-0.00255065	0.294078	0.294078	0.437351
241	PADI3	-0.00175827	0.346498	0.346498	0.490087
242	PADI4	-0.0162522	0.408857	0.408857	0.551008
243	PADI6	0.00145613	0.72822	0.72822	0.817053
244	RCC2	-0.0559446	0.0975222	0.0975222	0.188338
245	ARHGEF10L	-0.106962	0.00150735	0.00150735	0.00541483
246	IGSF21	0.0323491	2.41925e-05	2.41925e-05	0.000123299
247	KLHDC7A	-0.00206351	3.56435e-72	1e-30	1.02087e-70
248	ALDH4A1	0.0780779	0.00797361	0.00797361	0.0234074
249	IFFO2	-0.0989493	0.000168492	0.000168492	0.000746847
250	UBR4	-0.0894811	0.00299608	0.00299608	0.00997337
251	AL035413.1	-0.0125651	0.490959	0.490959	0.626347
252	EMC1	-0.0165404	0.550724	0.550724	0.678525
253	MRTO4	0.175673	2.74825e-06	2.74825e-06	1.59424e-05
254	AKR7A3	0.000210437	0.984335	0.984335	0.99089
255	AKR7A2	0.220216	3.5236e-11	3.5236e-11	3.21004e-10
256	PQLC2	0.00874807	0.800066	0.800066	0.869427
257	CAPZB	0.0815411	0.0107309	0.0107309	0.0302397
258	MINOS1	0.19585	3.31521e-08	3.31521e-08	2.3908e-07
259	NBL1	0.0186271	0.0543799	0.0543799	0.118342
260	TMCO4	0.0667117	0.00410571	0.00410571	0.0131805
261	OTUD3	0.0135826	0.495696	0.495696	0.630509
262	PLA2G2D	0.0538825	0.00243599	0.00243599	0.00832111
263	Z98257.1	-0.00290875	0.444101	0.444101	0.584863
264	PLA2G2C	0.0298419	1.66747e-06	1.66747e-06	9.93664e-06
265	UBXN10-AS1	0.0123084	0.203227	0.203227	0.331368
266	UBXN10	-0.0148778	0.0274912	0.0274912	0.0672349
267	CAMK2N1	0.00531029	0.103469	0.103469	0.197022
268	MUL1	-0.0430795	0.127372	0.127372	0.231927
269	CDA	0.131545	1.61661e-05	1.61661e-05	8.46005e-05
270	PINK1	0.00565594	0.839561	0.839561	0.898481
271	PINK1-AS	0.00472666	0.73405	0.73405	0.821165
272	DDOST	0.0942989	0.00460559	0.00460559	0.0145902
273	KIF17	0.0344774	0.00245165	0.00245165	0.0083689
274	SH2D5	0.0160239	4.02227e-09	4.02227e-09	3.14065e-08
275	HP1BP3	0.115738	0.00036239	0.00036239	0.00150417
276	EIF4G3	-0.0309448	0.295004	0.295004	0.43845
277	ECE1	-0.202834	2.80964e-31	1e-30	5.00803e-30
278	AL031005.1	-0.00244724	7.29456e-89	1e-30	2.34288e-87
279	AL031728.1	-0.0212705	3.67201e-08	3.67201e-08	2.63583e-07
280	NBPF3	-0.00461817	0.364451	0.364451	0.507772
281	ALPL	-0.143973	4.54894e-32	1e-30	8.19543e-31
282	AL359815.1	-0.0119698	0.000142851	0.000142851	0.00064254
283	RAP1GAP	-0.00226627	0.68243	0.68243	0.782221
284	USP48	0.0326371	0.21523	0.21523	0.346137
285	HSPG2	-0.00600188	0.446697	0.446697	0.586858
286	LINC01635	-0.00416127	0.782876	0.782876	0.85686
287	CDC42	-0.198236	5.67365e-11	5.67365e-11	5.10172e-10
288	AL031281.2	-0.00438019	0.478269	0.478269	0.61472
289	WNT4	0.000767645	0.889749	0.889749	0.932754
290	ZBTB40	-0.0472348	0.0486621	0.0486621	0.108051
291	C1QA	0.454741	3.14653e-30	3.14653e-30	5.50122e-29
292	C1QC	0.601756	1.02348e-48	1e-30	2.33048e-47
293	C1QB	0.644925	1.37509e-57	1e-30	3.43022e-56
294	EPHB2	-0.00929767	0.704953	0.704953	0.798599
295	KDM1A	-0.00713062	0.789967	0.789967	0.862274
296	LUZP1	-0.0503437	0.0553022	0.0553022	0.119985
297	LINC01355	0.00209256	0.783958	0.783958	0.857671
298	HNRNPR	0.00902761	0.768522	0.768522	0.846139
299	ZNF436	-0.0222568	0.0521972	0.0521972	0.114447
300	ZNF436-AS1	0.00953305	0.373926	0.373926	0.516789
301	TCEA3	0.000173197	0.980038	0.980038	0.988345
302	ASAP3	0.00152168	0.812522	0.812522	0.878688
303	E2F2	-0.00316766	0.580287	0.580287	0.702635
304	ID3	0.063438	0.0588495	0.0588495	0.125862
305	MDS2	0.00476249	0.0728098	0.0728098	0.149577
306	RPL11	0.341892	2.64946e-36	1e-30	5.17687e-35
307	ELOA	0.0363838	0.235974	0.235974	0.371244
308	ELOA-AS1	0.0110883	0.512635	0.512635	0.645562
309	PITHD1	0.0569831	0.0792064	0.0792064	0.159716
310	LYPLA2	-0.0494713	0.0985113	0.0985113	0.189706
311	GALE	0.114992	0.000559536	0.000559536	0.00223614
312	HMGCL	0.00246159	0.934505	0.934505	0.960788
313	FUCA1	0.217975	4.62556e-09	4.62556e-09	3.58623e-08
314	CNR2	-0.00265295	0.649928	0.649928	0.757401
315	PNRC2	-0.27064	5.65585e-20	5.65585e-20	7.58616e-19
316	SRSF10	0.0441022	0.136934	0.136934	0.245318
317	MYOM3	-0.00719341	0.0400504	0.0400504	0.092029
318	IL22RA1	-0.00687892	1.66014e-185	1e-30	2.18162e-183
319	IFNLR1	0.0204005	0.220085	0.220085	0.352256
320	GRHL3	0.00522218	6.2985e-97	1e-30	2.17217e-95
321	STPG1	-0.00207695	0.915678	0.915678	0.948577
322	NIPAL3	0.0650331	0.000123879	0.000123879	0.000563508
323	RCAN3	0.0955159	5.91424e-05	5.91424e-05	0.000284002
324	AL445686.2	0.0422121	0.00301148	0.00301148	0.0100097
325	NCMAP	0.00355577	0.179826	0.179826	0.302179
326	SRRM1	0.0270739	0.395285	0.395285	0.537565
327	CLIC4	0.00532774	0.869009	0.869009	0.918337
328	RUNX3	-0.0782591	0.000835663	0.000835663	0.0032034
329	AL445471.1	0.017352	0.00497752	0.00497752	0.0156177
330	AL445471.2	0.00136167	0.606648	0.606648	0.723402
331	AL031432.1	0.00582478	9.64134e-97	1e-30	3.308e-95
332	SYF2	-0.101271	0.000398168	0.000398168	0.00163546
333	AL031432.5	0.00639615	0.405249	0.405249	0.547209
334	RSRP1	-0.322094	6.44259e-44	1e-30	1.3854e-42
335	AL031432.3	0.0022861	0.799987	0.799987	0.869427
336	RHD	0.00625737	0.229763	0.229763	0.364069
337	TMEM50A	0.245976	8.2783e-14	8.2783e-14	8.66893e-13
338	RHCE	0.00127343	0.885143	0.885143	0.929283
339	MACO1	0.0108046	0.677232	0.677232	0.77826
340	LDLRAP1	0.0154265	0.453185	0.453185	0.592144
341	MAN1C1	0.0184044	0.273137	0.273137	0.413655
342	SELENON	0.0123747	0.714889	0.714889	0.806914
343	AL020996.1	0.00142862	0.909298	0.909298	0.944775
344	MTFR1L	-0.056958	0.0508784	0.0508784	0.112032
345	AUNIP	-0.000484303	0.907874	0.907874	0.944031
346	AL033528.2	-0.0291205	0.175491	0.175491	0.296656
347	PAQR7	-0.0129826	0.127505	0.127505	0.232027
348	STMN1	0.197114	9.8249e-12	9.8249e-12	9.23945e-11
349	PAFAH2	0.0306035	0.232733	0.232733	0.367294
350	EXTL1	-0.00411304	0.272308	0.272308	0.412711
351	PDIK1L	0.0212929	0.206357	0.206357	0.335247
352	FAM110D	0.00695769	0.208903	0.208903	0.338507
353	AL391650.1	0.00148224	0.873822	0.873822	0.922164
354	ZNF593	0.0479233	0.1409	0.1409	0.250946
355	CNKSR1	0.000978898	0.866772	0.866772	0.917275
356	CEP85	-0.0271753	0.201135	0.201135	0.328756
357	SH3BGRL3	0.356102	1.37051e-42	1e-30	2.90977e-41
358	UBXN11	-0.117826	2.23243e-05	2.23243e-05	0.000114445
359	CD52	0.285689	1.13841e-16	1.13841e-16	1.35677e-15
360	CRYBG2	0.00471991	0.365383	0.365383	0.508576
361	ZNF683	0.0532461	2.03311e-59	1e-30	5.22733e-58
362	DHDDS	0.0320456	0.332334	0.332334	0.475542
363	HMGN2	-0.228054	5.48553e-14	5.48553e-14	5.79874e-13
364	RPS6KA1	-0.138404	1.22831e-06	1.22831e-06	7.45215e-06
365	AL512408.1	-0.00101367	0.754037	0.754037	0.835575
366	ARID1A	-0.0550998	0.0695841	0.0695841	0.14401
367	PIGV	0.0443043	0.102586	0.102586	0.195784
368	ZDHHC18	-0.0999903	7.33844e-10	7.33844e-10	6.10707e-09
369	SFN	-0.0175807	3.35348e-08	3.35348e-08	2.41667e-07
370	GPN2	-0.0479893	0.0910994	0.0910994	0.178505
371	GPATCH3	-0.0891083	0.00221998	0.00221998	0.00764819
372	NUDC	0.00349421	0.897521	0.897521	0.937918
373	KDF1	-0.001792	5.20004e-19	5.20004e-19	6.78468e-18
374	TRNP1	-0.0112054	0.0200799	0.0200799	0.0514882
375	TENT5B	-0.00280452	0.700529	0.700529	0.79526
376	SLC9A1	-0.102215	2.55347e-06	2.55347e-06	1.48467e-05
377	WDTC1	-0.0668483	0.00412269	0.00412269	0.0132308
378	TMEM222	0.0202865	0.49643	0.49643	0.631091
379	SYTL1	0.0535193	3.09661e-07	3.09661e-07	2.02803e-06
380	MAP3K6	-0.0365872	0.0443054	0.0443054	0.100147
381	CD164L2	-0.0149749	9.24309e-15	9.24309e-15	1.00727e-13
382	GPR3	-0.0340382	0.0022722	0.0022722	0.0078107
383	WASF2	-0.0783251	0.0151031	0.0151031	0.0404396
384	BX293535.1	0.0143785	1.47878e-13	1.47878e-13	1.52866e-12
385	AHDC1	-0.0227728	0.221474	0.221474	0.353999
386	FGR	-0.349507	7.1413e-39	1e-30	1.44887e-37
387	LINC02574	-0.0142678	0.0212822	0.0212822	0.0540396
388	IFI6	0.00906372	0.781356	0.781356	0.855895
389	AL445490.1	-0.00961314	3.32903e-07	3.32903e-07	2.17246e-06
390	FAM76A	-0.0248249	0.387167	0.387167	0.530055
391	STX12	0.00821256	0.794601	0.794601	0.865585
392	PPP1R8	0.0214617	0.447824	0.447824	0.587955
393	THEMIS2	-0.148297	9.5905e-07	9.5905e-07	5.89684e-06
394	RPA2	0.0321947	0.25714	0.25714	0.395385
395	SMPDL3B	-0.0102112	0.000116302	0.000116302	0.000530963
396	XKR8	0.0510348	0.0732407	0.0732407	0.150294
397	EYA3	-0.0565941	0.0295234	0.0295234	0.0714144
398	PTAFR	-0.174691	2.36654e-10	2.36654e-10	2.04301e-09
399	DNAJC8	0.182962	4.62025e-08	4.62025e-08	3.27992e-07
400	ATP5IF1	0.0474467	0.0548387	0.0548387	0.119184
401	AL353622.1	0.00985154	0.207479	0.207479	0.336879
402	SESN2	-0.105756	0.000175764	0.000175764	0.00077634
403	MED18	-0.00720751	0.724742	0.724742	0.814423
404	PHACTR4	-0.0427915	0.147262	0.147262	0.259495
405	RCC1	-0.156316	7.74281e-09	7.74281e-09	5.90132e-08
406	TRNAU1AP	0.0338677	0.292782	0.292782	0.436082
407	SNHG12	-0.107708	8.1227e-05	8.1227e-05	0.000381132
408	TAF12	0.0999767	0.00138554	0.00138554	0.00502773
409	RAB42	0.0422234	0.20219	0.20219	0.330024
410	LINC01715	0.0124354	0.390299	0.390299	0.53289
411	AL360012.1	-0.1422	2.62662e-08	2.62662e-08	1.90997e-07
412	GMEB1	-0.00328949	0.917377	0.917377	0.949783
413	YTHDF2	0.0505823	0.0986822	0.0986822	0.189939
414	EPB41	0.0503202	0.023521	0.023521	0.0587285
415	TMEM200B	0.0094041	0.0736012	0.0736012	0.150787
416	SRSF4	-0.0296857	0.315267	0.315267	0.459269
417	MECR	0.0300918	0.222707	0.222707	0.35549
418	PTPRU	0.0220868	0.00203234	0.00203234	0.0070794
419	MATN1	-0.0154965	0.0535932	0.0535932	0.116959
420	MATN1-AS1	-0.0245903	0.048395	0.048395	0.107553
421	LAPTM5	-0.202197	8.30043e-12	8.30043e-12	7.83881e-11
422	LINC01778	-0.00272838	0.144601	0.144601	0.255884
423	SDC3	0.0218476	0.511688	0.511688	0.644948
424	PUM1	-0.129756	8.95141e-06	8.95141e-06	4.87611e-05
425	SNRNP40	0.0313316	0.261807	0.261807	0.400831
426	ZCCHC17	0.0523207	0.108773	0.108773	0.205133
427	AL451070.1	0.00330246	0.308911	0.308911	0.452793
428	FABP3	0.416139	1.26208e-18	1.26208e-18	1.62558e-17
429	SERINC2	0.161283	4.83273e-07	4.83273e-07	3.08369e-06
430	TINAGL1	-0.0417681	9.69468e-05	9.69468e-05	0.000449231
431	HCRTR1	0.00755391	0.182171	0.182171	0.305076
432	PEF1	-0.140742	1.53402e-06	1.53402e-06	9.18496e-06
433	AC114488.2	0.00417236	0.657443	0.657443	0.763196
434	AC114488.3	0.00943062	0.456604	0.456604	0.595247
435	COL16A1	-0.000344272	0.37708	0.37708	0.519962
436	ADGRB2	0.0171293	0.0689922	0.0689922	0.143035
437	SPOCD1	0.0719247	0.0106116	0.0106116	0.0299953
438	AL354919.1	0.017392	0.197897	0.197897	0.324993
439	AL136115.2	-0.00816738	0.222033	0.222033	0.354696
440	PTP4A2	-0.144948	7.18865e-07	7.18865e-07	4.49425e-06
441	KHDRBS1	-0.140486	2.31668e-06	2.31668e-06	1.35444e-05
442	AL445248.1	4.76768e-05	0.988284	0.988284	0.99382
443	TMEM39B	-0.0233208	0.291204	0.291204	0.434278
444	KPNA6	-0.00131317	0.964913	0.964913	0.979628
445	TXLNA	-0.111262	0.000147777	0.000147777	0.000662918
446	CCDC28B	0.0113718	0.578173	0.578173	0.700834
447	AL049795.1	-0.00141096	0.78837	0.78837	0.861138
448	IQCC	0.000548493	0.947794	0.947794	0.969197
449	DCDC2B	0.0112356	0.195156	0.195156	0.321835
450	TMEM234	0.0466596	0.151236	0.151236	0.264759
451	EIF3I	-0.0381083	0.256217	0.256217	0.394417
452	FAM167B	0.00486473	0.379814	0.379814	0.522872
453	LCK	0.107842	1.51219e-45	1e-30	3.32649e-44
454	HDAC1	0.0781732	0.00523249	0.00523249	0.0163108
455	MARCKSL1	-0.0584841	0.0576018	0.0576018	0.123801
456	TSSK3	0.00574543	0.0773942	0.0773942	0.156943
457	FAM229A	-0.00688177	0.625523	0.625523	0.73855
458	BSDC1	-0.0886856	0.00219121	0.00219121	0.00756854
459	ZBTB8A	0.0030074	0.769696	0.769696	0.846952
460	ZBTB8OS	0.297657	6.05775e-16	6.05775e-16	7.00789e-15
461	RBBP4	0.101726	0.00146487	0.00146487	0.0052792
462	SYNC	0.0363552	0.0130903	0.0130903	0.0358281
463	KIAA1522	-0.00949283	0.414528	0.414528	0.556226
464	YARS	0.0633419	0.0133116	0.0133116	0.0363299
465	S100PBP	0.0371672	0.106079	0.106079	0.200987
466	FNDC5	0.00167872	0.688641	0.688641	0.786828
467	HPCA	0.00544531	0.00387331	0.00387331	0.0125123
468	TMEM54	-0.029979	0.00235496	0.00235496	0.00806487
469	RNF19B	-0.135542	2.30621e-06	2.30621e-06	1.34871e-05
470	AK2	0.0684653	0.0277802	0.0277802	0.067795
471	AZIN2	0.0110352	0.250962	0.250962	0.388231
472	TRIM62	-0.00205246	0.902877	0.902877	0.941168
473	ZNF362	0.040165	0.0493128	0.0493128	0.109182
474	A3GALT2	0.00534982	0.333888	0.333888	0.477125
475	AL513327.1	0.00406438	0.613416	0.613416	0.728749
476	PHC2	-0.156912	1.34476e-07	1.34476e-07	9.16531e-07
477	ZSCAN20	0.013204	0.349832	0.349832	0.493411
478	SMIM12	0.0991247	0.00434825	0.00434825	0.0138749
479	GJB5	-0.00274846	2.56733e-191	1e-30	2.77777e-188
480	GJB4	0.000666965	5.34675e-176	1e-30	4.3523e-174
481	GJB3	-0.00273981	0.143836	0.143836	0.254889
482	GJA4	-0.00696672	9.81532e-65	1e-30	2.61733e-63
483	DLGAP3	-0.0176206	0.448498	0.448498	0.588418
484	AC114490.3	-0.00342337	0.766447	0.766447	0.844856
485	AC114490.2	0.0274913	0.163231	0.163231	0.280842
486	TMEM35B	0.219435	3.29661e-09	3.29661e-09	2.59622e-08
487	ZMYM6	-0.0379071	0.173932	0.173932	0.294589
488	ZMYM1	-0.00453355	0.834365	0.834365	0.894789
489	AL590434.1	-0.00171377	0.358444	0.358444	0.501663
490	SFPQ	-0.293257	2.56286e-23	2.56286e-23	3.834e-22
491	ZMYM4	0.0233158	0.461469	0.461469	0.599683
492	ZMYM4-AS1	0.024292	0.0227052	0.0227052	0.0570482
493	KIAA0319L	-0.0261055	0.273749	0.273749	0.414427
494	NCDN	0.0541883	0.0034752	0.0034752	0.011365
495	AC004865.2	0.0465932	0.0276826	0.0276826	0.0676043
496	TFAP2E	0.0110133	0.369606	0.369606	0.51261
497	PSMB2	0.309099	3.82711e-18	3.82711e-18	4.80624e-17
498	C1orf216	-0.0171697	0.504354	0.504354	0.638452
499	CLSPN	0.0700598	9.53088e-06	9.53088e-06	5.16656e-05
500	AGO4	-0.0766261	0.00586547	0.00586547	0.018013
501	AGO1	-0.00916286	0.762949	0.762949	0.841819
502	AL139286.2	0.01092	0.000868429	0.000868429	0.00331384
503	AGO3	-0.0688007	0.0145426	0.0145426	0.0391738
504	TEKT2	-0.0126017	6.79062e-37	1e-30	1.34382e-35
505	ADPRHL2	0.0100987	0.72653	0.72653	0.81584
506	COL8A2	0.0724372	0.00650228	0.00650228	0.0196417
507	TRAPPC3	0.157022	4.16832e-06	4.16832e-06	2.36947e-05
508	MAP7D1	-0.116628	7.3928e-05	7.3928e-05	0.000349493
509	THRAP3	0.00459727	0.876697	0.876697	0.923695
510	SH3D21	-0.177802	6.38661e-16	6.38661e-16	7.37137e-15
511	EVA1B	-0.0352533	0.238069	0.238069	0.373574
512	AL591845.1	-0.095276	7.22353e-06	7.22353e-06	3.97908e-05
513	STK40	-0.198154	1.88477e-14	1.88477e-14	2.02757e-13
514	LSM10	0.109205	0.00122835	0.00122835	0.00451338
515	OSCP1	-0.00634927	0.584837	0.584837	0.706273
516	MRPS15	0.105165	0.00168736	0.00168736	0.00598978
517	CSF3R	-0.387012	2.07823e-85	1e-30	6.52888e-84
518	LINC01137	0.105895	0.000180997	0.000180997	0.000797352
519	ZC3H12A	0.00904829	0.751627	0.751627	0.83365
520	MEAF6	0.0972425	0.000299149	0.000299149	0.00126253
521	SNIP1	-0.0725511	0.00452103	0.00452103	0.0143556
522	DNALI1	-0.0237429	4.92953e-08	4.92953e-08	3.48499e-07
523	GNL2	0.0286353	0.363264	0.363264	0.506539
524	C1orf109	-0.00790996	0.66904	0.66904	0.772323
525	CDCA8	0.0664769	1.33001e-05	1.33001e-05	7.04644e-05
526	MANEAL	0.00935134	0.42289	0.42289	0.564883
527	AL929472.3	0.00975085	3.1746e-07	3.1746e-07	2.07707e-06
528	YRDC	0.019124	0.555807	0.555807	0.683029
529	C1orf122	0.207134	2.04839e-08	2.04839e-08	1.50805e-07
530	MTF1	-0.0686306	0.0122004	0.0122004	0.0336768
531	AL929472.2	-0.00485141	0.0658542	0.0658542	0.137823
532	INPP5B	0.00556227	0.826527	0.826527	0.889147
533	SF3A3	0.0576778	0.0481801	0.0481801	0.107182
534	FHL3	0.0520614	0.114843	0.114843	0.214296
535	UTP11	0.125105	0.000404891	0.000404891	0.00166002
536	POU3F1	0.00197861	0.559399	0.559399	0.686019
537	RRAGC	-0.0305045	0.291705	0.291705	0.434736
538	AL139260.1	-0.00969303	0.722318	0.722318	0.812789
539	MYCBP	0.0743572	0.0081985	0.0081985	0.0239626
540	RHBDL2	6.9481e-05	0.967672	0.967672	0.981239
541	AKIRIN1	-0.0478701	0.091445	0.091445	0.179026
542	NDUFS5	0.295014	3.63728e-17	3.63728e-17	4.4295e-16
543	MACF1	-0.0184495	0.511719	0.511719	0.644948
544	BMP8A	0.00416732	0.202974	0.202974	0.331061
545	PABPC4	-0.189558	1.67513e-08	1.67513e-08	1.24419e-07
546	AL365277.1	0.0177268	0.127248	0.127248	0.231785
547	HPCAL4	9.26368e-05	0.977181	0.977181	0.986389
548	PPIE	0.18604	2.08417e-07	2.08417e-07	1.39171e-06
549	BMP8B	0.00993672	0.25332	0.25332	0.391007
550	OXCT2	-0.0275242	0.0403197	0.0403197	0.0925103
551	AL033527.3	-0.000757922	0.884335	0.884335	0.928677
552	AL033527.5	-0.0469391	0.00283573	0.00283573	0.00950729
553	AL033527.4	0.0160467	0.132139	0.132139	0.238705
554	TRIT1	-0.00362453	0.819052	0.819052	0.883469
555	MYCL	0.0101619	0.580656	0.580656	0.702828
556	AL033527.2	0.0128403	0.0139041	0.0139041	0.0377217
557	MFSD2A	-0.122291	5.01324e-05	5.01324e-05	0.000243823
558	CAP1	0.0151597	0.626504	0.626504	0.739273
559	PPT1	0.0596729	0.0856697	0.0856697	0.16997
560	RLF	-0.123155	1.45075e-07	1.45075e-07	9.86429e-07
561	AL050341.2	-0.0230466	0.206066	0.206066	0.334964
562	ZMPSTE24	0.0495719	0.0982631	0.0982631	0.189332
563	COL9A2	-0.000639646	0.959943	0.959943	0.977098
564	SMAP2	-0.00407327	0.889374	0.889374	0.932507
565	AL031985.4	0.00941164	0.330515	0.330515	0.473787
566	ZFP69B	0.00829132	0.438122	0.438122	0.579074
567	ZFP69	0.0103422	0.309925	0.309925	0.453783
568	AL603839.3	0.0126121	0.117861	0.117861	0.218628
569	EXO5	0.029788	0.186992	0.186992	0.311153
570	AL603839.1	-0.00437357	0.098129	0.098129	0.1892
571	ZNF684	-0.0018697	0.926059	0.926059	0.955273
572	RIMS3	0.0105815	0.23111	0.23111	0.365738
573	NFYC-AS1	-0.0949976	2.3252e-05	2.3252e-05	0.000118837
574	NFYC	-0.0515653	0.0881313	0.0881313	0.173808
575	KCNQ4	0.00305002	0.467067	0.467067	0.605041
576	CITED4	-0.00622381	0.74502	0.74502	0.828926
577	CTPS1	0.000203251	0.993108	0.993108	0.996329
578	SLFNL1-AS1	0.0220904	5.99464e-11	5.99464e-11	5.38313e-10
579	SCMH1	-0.0210126	0.205562	0.205562	0.334306
580	FOXO6	0.00312333	0.336089	0.336089	0.479181
581	EDN2	-0.00341827	0.50234	0.50234	0.636388
582	HIVEP3	-0.0768567	0.0145211	0.0145211	0.0391527
583	FOXJ3	0.0260497	0.3605	0.3605	0.503803
584	ZMYND12	0.0373222	0.0147019	0.0147019	0.039534
585	PPCS	0.210494	8.87076e-10	8.87076e-10	7.33973e-09
586	CCDC30	0.0307087	0.144177	0.144177	0.255335
587	PPIH	0.0690648	0.0231974	0.0231974	0.0580831
588	YBX1	0.0696453	0.0350145	0.0350145	0.0822336
589	P3H1	0.0357511	0.236006	0.236006	0.371265
590	C1orf50	0.0275383	0.324084	0.324084	0.467434
591	AC098484.3	0.0133975	0.442677	0.442677	0.583408
592	TMEM269	0.00596937	0.0669235	0.0669235	0.139654
593	SVBP	0.142772	4.16848e-05	4.16848e-05	0.00020532
594	ERMAP	-0.0506676	0.0420049	0.0420049	0.0957324
595	AL512353.1	-0.00853042	0.70708	0.70708	0.800301
596	ZNF691	0.00305527	0.879728	0.879728	0.925967
597	SLC2A1	0.0113779	0.593956	0.593956	0.713343
598	SLC2A1-AS1	0.01437	0.0808646	0.0808646	0.162278
599	FAM183A	-0.023123	5.13608e-49	1e-30	1.17348e-47
600	EBNA1BP2	0.0490464	0.0978366	0.0978366	0.188854
601	CFAP57	-0.0115157	3.88522e-178	1e-30	3.32409e-176
602	TMEM125	-0.00819872	2.13565e-81	1e-30	6.52574e-80
603	C1orf210	0.00135401	2.78494e-16	2.78494e-16	3.27259e-15
604	TIE1	0.00590294	0.395538	0.395538	0.537747
605	AL139289.2	0.00154667	0.924232	0.924232	0.954227
606	CDC20	0.0339222	2.88163e-05	2.88163e-05	0.000145427
607	ELOVL1	-0.00609842	0.855924	0.855924	0.910251
608	MED8	0.154404	1.13619e-05	1.13619e-05	6.08529e-05
609	AL139289.1	-0.00672258	0.272996	0.272996	0.413473
610	SZT2	-0.0798137	0.00210448	0.00210448	0.00730546
611	HYI	0.0512032	0.0337479	0.0337479	0.0798559
612	PTPRF	-0.00781713	0.16742	0.16742	0.286334
613	AL451062.3	-0.00433458	0.804774	0.804774	0.872797
614	KDM4A	-0.0378535	0.0714056	0.0714056	0.147159
615	KDM4A-AS1	0.00672895	0.519549	0.519549	0.651209
616	ST3GAL3	-0.0101502	0.672486	0.672486	0.774665
617	ARTN	0.00152896	0.715036	0.715036	0.80699
618	IPO13	-0.0380154	0.135885	0.135885	0.243763
619	DPH2	-0.0349072	0.0707254	0.0707254	0.146071
620	ATP6V0B	0.381543	3.03842e-36	1e-30	5.91963e-35
621	B4GALT2	-0.0305351	0.0379365	0.0379365	0.0878747
622	CCDC24	0.000918801	0.945815	0.945815	0.967862
623	SLC6A9	-0.00165196	0.790402	0.790402	0.862654
624	AL139220.2	0.0102371	0.0417714	0.0417714	0.0953082
625	DMAP1	0.0663476	0.0415167	0.0415167	0.094813
626	ERI3	0.0757239	0.0163384	0.0163384	0.0431782
627	RNF220	-0.188946	2.161e-12	2.161e-12	2.10815e-11
628	TMEM53	0.0467771	0.147862	0.147862	0.260279
629	ARMH1	-0.0654925	0.0171639	0.0171639	0.0449932
630	KIF2C	0.0517035	4.66989e-10	4.66989e-10	3.94508e-09
631	AL592166.1	0.00485025	0.50041	0.50041	0.634629
632	RPS8	0.351527	2.21168e-40	1e-30	4.56083e-39
633	BEST4	-0.0133007	0.000288347	0.000288347	0.00122259
634	PLK3	-0.33635	5.33098e-45	1e-30	1.16252e-43
635	TCTEX1D4	-0.0153077	0.182073	0.182073	0.305012
636	BTBD19	-0.236722	1.80273e-27	1.80273e-27	2.98565e-26
637	PTCH2	-0.0666867	0.0516638	0.0516638	0.113537
638	EIF2B3	0.100472	0.00136117	0.00136117	0.00495254
639	HECTD3	0.0596683	0.05866	0.05866	0.125556
640	UROD	0.191777	4.18399e-07	4.18399e-07	2.69453e-06
641	ZSWIM5	-0.0102796	0.00178567	0.00178567	0.00630424
642	LINC01144	-0.00562657	0.603014	0.603014	0.72065
643	HPDL	0.0216728	5.93314e-15	5.93314e-15	6.52224e-14
644	MUTYH	-0.00440819	0.801882	0.801882	0.870591
645	TOE1	-0.0221238	0.327275	0.327275	0.470547
646	TESK2	-0.0970125	2.29344e-05	2.29344e-05	0.000117333
647	CCDC163	-0.00623743	0.533294	0.533294	0.663761
648	MMACHC	0.0152224	0.518848	0.518848	0.650575
649	PRDX1	0.352415	2.24765e-26	2.24765e-26	3.59803e-25
650	AKR1A1	0.304815	7.13712e-18	7.13712e-18	8.90744e-17
651	NASP	-0.0761977	0.00234559	0.00234559	0.00803826
652	CCDC17	-0.019783	0.0080287	0.0080287	0.0235437
653	GPBP1L1	-0.0585445	0.0421903	0.0421903	0.0961004
654	TMEM69	0.0643129	0.0642732	0.0642732	0.135119
655	IPP	0.0125092	0.518195	0.518195	0.650242
656	MAST2	-0.0511044	0.0337686	0.0337686	0.0798955
657	PIK3R3	-0.0153365	0.162028	0.162028	0.279251
658	TSPAN1	-0.0458014	3.21137e-24	3.21137e-24	4.8841e-23
659	POMGNT1	0.055122	0.0476655	0.0476655	0.106272
660	LURAP1	0.0372546	0.0092029	0.0092029	0.0265167
661	RAD54L	0.0143454	0.00850559	0.00850559	0.0247523
662	LRRC41	-0.00320285	0.914038	0.914038	0.947497
663	UQCRH	-0.0328516	0.326008	0.326008	0.469321
664	NSUN4	-0.0704123	0.0091895	0.0091895	0.0264895
665	FAAH	-0.00158441	0.893806	0.893806	0.935739
666	DMBX1	-0.00929913	0.270075	0.270075	0.410285
667	MKNK1	-0.0981323	0.000298206	0.000298206	0.00125987
668	MOB3C	-0.076408	0.00541634	0.00541634	0.0168031
669	ATPAF1	0.030935	0.219703	0.219703	0.35186
670	EFCAB14	0.0540042	0.101109	0.101109	0.193701
671	CYP4B1	-0.0268375	2.97408e-149	1e-30	1.58612e-147
672	CYP4X1	-0.0041297	4.27079e-185	1e-30	5.43471e-183
673	PDZK1IP1	-0.0101759	1.98666e-33	1e-30	3.73307e-32
674	STIL	0.0343799	0.0108694	0.0108694	0.030548
675	CMPK1	0.0904865	0.00255536	0.00255536	0.00867726
676	FOXD2-AS1	0.00998986	0.426352	0.426352	0.56823
677	FOXD2	-0.00931741	0.343995	0.343995	0.487548
678	SLC5A9	-0.00886754	4.48241e-112	1e-30	1.74658e-110
679	SPATA6	-0.0133548	0.417505	0.417505	0.559177
680	AGBL4	-0.00763979	1.44828e-149	1e-30	7.76511e-148
681	BEND5	0.000600891	0.748243	0.748243	0.83117
682	ELAVL4	0.0137616	0.201344	0.201344	0.328964
683	DMRTA2	0.00516618	5.54375e-28	5.54375e-28	9.2731e-27
684	FAF1	0.0173961	0.491564	0.491564	0.62688
685	CDKN2C	-0.0175249	0.343852	0.343852	0.487426
686	RNF11	-0.0298658	0.319391	0.319391	0.463425
687	TTC39A	-0.00524615	0.406607	0.406607	0.5486
688	TTC39A-AS1	0.0066491	0.351509	0.351509	0.495127
689	EPS15	0.0413858	0.152723	0.152723	0.266828
690	AC104170.1	0.00745228	8.24896e-05	8.24896e-05	0.000386515
691	OSBPL9	-0.0119475	0.645978	0.645978	0.75446
692	NRDC	0.0595411	0.0280906	0.0280906	0.0684179
693	AL050343.1	-0.00246579	0.727052	0.727052	0.816199
694	AL050343.2	0.00933815	0.0918616	0.0918616	0.179719
695	RAB3B	0.00106236	0.899311	0.899311	0.938911
696	TXNDC12	-0.0269741	0.383926	0.383926	0.526693
697	KTI12	0.0176657	0.442125	0.442125	0.582757
698	AL445685.1	0.00977668	0.175175	0.175175	0.296197
699	BTF3L4	0.0588494	0.0847144	0.0847144	0.16844
700	ZFYVE9	0.00650585	0.610276	0.610276	0.726438
701	CC2D1B	-0.0733697	0.0110186	0.0110186	0.0309106
702	ORC1	0.00301653	0.742642	0.742642	0.827554
703	PRPF38A	-0.054648	0.0599966	0.0599966	0.127826
704	TUT4	-0.0344178	0.104307	0.104307	0.198222
705	GPX7	0.0215061	0.143313	0.143313	0.254164
706	SHISAL2A	-0.0113376	0.374907	0.374907	0.517854
707	COA7	0.0179419	0.544955	0.544955	0.673771
708	ZYG11B	0.000555381	0.984267	0.984267	0.99089
709	ZYG11A	-0.00226693	0.231608	0.231608	0.366152
710	ECHDC2	0.0482403	0.00533537	0.00533537	0.0165929
711	SCP2	0.16185	1.03197e-06	1.03197e-06	6.31816e-06
712	SLC1A7	0.00391279	3.04026e-154	1e-30	1.69798e-152
713	CPT2	0.0830009	0.0107669	0.0107669	0.0303236
714	AL606760.2	-0.00406035	0.546156	0.546156	0.674717
715	C1orf123	0.131658	0.000105703	0.000105703	0.000486441
716	AL606760.3	0.00390034	0.526108	0.526108	0.657014
717	MAGOH	0.129678	6.14697e-05	6.14697e-05	0.000294404
718	AL606760.1	0.00900905	0.44946	0.44946	0.589245
719	LRP8	-0.0127918	0.502603	0.502603	0.636637
720	LINC01771	0.00497059	0.127008	0.127008	0.231548
721	AC119428.2	0.0116565	0.19661	0.19661	0.323622
722	NDC1	0.0402133	0.0748836	0.0748836	0.153025
723	YIPF1	0.0893625	0.00676824	0.00676824	0.0203442
724	DIO1	0.00300697	0.109436	0.109436	0.206118
725	HSPB11	0.0917976	0.00131078	0.00131078	0.00479347
726	LRRC42	0.0420603	0.152779	0.152779	0.266856
727	LDLRAD1	-0.0186885	1.31499e-07	1.31499e-07	8.97458e-07
728	TMEM59	0.156943	7.92239e-08	7.92239e-08	5.5155e-07
729	TCEANC2	0.00312487	0.881723	0.881723	0.927192
730	AL357673.1	0.0367306	9.0363e-11	9.0363e-11	8.00017e-10
731	CYB5RL	0.00661907	0.605699	0.605699	0.722757
732	MRPL37	0.170486	4.125e-07	4.125e-07	2.6608e-06
733	SSBP3	-0.0935533	0.00285955	0.00285955	0.00957558
734	SSBP3-AS1	0.00389738	0.141429	0.141429	0.251644
735	ACOT11	0.0182886	0.417644	0.417644	0.559288
736	MROH7	-0.00320969	0.0867116	0.0867116	0.171699
737	TTC4	0.0382985	0.191392	0.191392	0.316894
738	PARS2	0.0180148	0.101366	0.101366	0.19399
739	TTC22	0.0217737	3.65703e-191	1e-30	2.77777e-188
740	DHCR24	-0.0164621	0.33307	0.33307	0.476307
741	AC096536.3	0.0287432	3.06224e-07	3.06224e-07	2.00814e-06
742	TMEM61	-0.00387418	0.0383281	0.0383281	0.0885878
743	BSND	0.000635766	0.0726111	0.0726111	0.14923
744	USP24	-0.0774263	0.00636838	0.00636838	0.0192806
745	MIR4422HG	0.00221143	0.632333	0.632333	0.743899
746	AC119674.1	-0.00558166	0.562716	0.562716	0.688743
747	AC119674.2	-0.0423558	0.00356439	0.00356439	0.0116189
748	PLPP3	-0.0885472	0.00183981	0.00183981	0.00647378
749	PRKAA2	-0.00590914	1.26044e-161	1e-30	7.84595e-160
750	FYB2	-0.00627865	2.04085e-80	1e-30	6.20776e-79
751	C8B	0.000288811	0.955923	0.955923	0.974486
752	DAB1	0.019934	1.54549e-190	1e-30	5.26672e-188
753	OMA1	0.0376149	0.0722777	0.0722777	0.148636
754	TACSTD2	-0.0447069	4.0234e-47	1e-30	9.0083e-46
755	MYSM1	-0.00429764	0.875111	0.875111	0.92304
756	JUN	-0.577191	1.04029e-81	1e-30	3.19817e-80
757	LINC01135	0.0033051	0.739516	0.739516	0.825076
758	AL136985.2	0.00597495	0.306754	0.306754	0.450617
759	AC105277.1	-0.0246676	0.145095	0.145095	0.256442
760	LINC01358	0.0449222	0.00366681	0.00366681	0.011924
761	AL592431.1	0.0348	0.00162529	0.00162529	0.00579192
762	AC093424.1	-0.0280942	0.000814076	0.000814076	0.00312602
763	FGGY	0.000325617	0.988868	0.988868	0.994063
764	HOOK1	-0.000970057	0.696831	0.696831	0.792546
765	CYP2J2	0.000628425	1.16517e-11	1.16517e-11	1.09217e-10
766	C1orf87	-0.00821378	2.75652e-111	1e-30	1.06582e-109
767	NFIA	0.0387161	0.0282956	0.0282956	0.0688755
768	TM2D1	0.101478	0.00298073	0.00298073	0.00992885
769	AC099791.2	-0.00392885	3.20058e-175	1e-30	2.58437e-173
770	PATJ	0.00280814	0.65359	0.65359	0.760259
771	L1TD1	0.0117117	0.487287	0.487287	0.623164
772	USP1	0.0379373	0.191759	0.191759	0.317219
773	DOCK7	-0.015909	0.623215	0.623215	0.736592
774	AC103923.1	0.00199784	0.732554	0.732554	0.82004
775	ATG4C	0.0478338	0.096964	0.096964	0.187512
776	FOXD3-AS1	0.0185386	0.0800347	0.0800347	0.160934
777	FOXD3	0.0125038	0.120615	0.120615	0.22269
778	ALG6	0.0833407	0.0010966	0.0010966	0.00408151
779	ITGB3BP	0.0422787	0.0806168	0.0806168	0.16191
780	EFCAB7	-0.0109276	0.254491	0.254491	0.39233
781	PGM1	0.0617424	0.00519601	0.00519601	0.0162096
782	ROR1-AS1	-0.0149859	0.0955882	0.0955882	0.185493
783	CACHD1	-0.00356092	2.31027e-36	1e-30	4.53173e-35
784	RAVER2	-0.00625724	0.297448	0.297448	0.440941
785	JAK1	0.0684417	0.0328187	0.0328187	0.0779691
786	AL357078.3	0.000219697	0.98676	0.98676	0.992667
787	AL357078.1	-0.0253739	0.0994891	0.0994891	0.191181
788	AK4	-0.0950433	0.00665147	0.00665147	0.0200291
789	DNAJC6	-0.00398393	0.800873	0.800873	0.870025
790	LEPROT	0.0308361	0.369987	0.369987	0.512915
791	LEPR	-0.0344744	0.087366	0.087366	0.172569
792	PDE4B	-0.13028	9.05727e-07	9.05727e-07	5.58434e-06
793	SGIP1	0.00601517	0.66264	0.66264	0.7675
794	TCTEX1D1	-0.0209061	0.221419	0.221419	0.353967
795	WDR78	-0.0185732	0.10211	0.10211	0.19511
796	MIER1	0.0560924	0.0587972	0.0587972	0.125777
797	SLC35D1	0.0111021	0.668063	0.668063	0.771661
798	C1orf141	-0.00719817	3.21809e-188	1e-30	5.09472e-186
799	IL23R	0.0024644	0.67356	0.67356	0.775325
800	IL12RB2	0.0609813	6.41002e-16	6.41002e-16	7.39414e-15
801	SERBP1	0.0547681	0.0838743	0.0838743	0.167233
802	GADD45A	0.035888	0.209503	0.209503	0.339261
803	GNG12	0.0146769	0.384919	0.384919	0.52784
804	DIRAS3	-0.00065929	4.83242e-06	4.83242e-06	2.72006e-05
805	WLS	0.011563	0.572488	0.572488	0.696629
806	DEPDC1	0.0269389	3.46605e-37	1e-30	6.87261e-36
807	LRRC40	-0.0206522	0.427699	0.427699	0.569495
808	SRSF11	-0.07414	0.0141138	0.0141138	0.0381877
809	AL353771.1	0.00900141	0.142854	0.142854	0.253613
810	ANKRD13C	0.00973029	0.721558	0.721558	0.812207
811	HHLA3	0.107207	9.835e-05	9.835e-05	0.000455104
812	CTH	-0.00726899	0.65089	0.65089	0.758162
813	PTGER3	-0.00612808	0.481239	0.481239	0.617512
814	AL031429.1	-0.00769062	0.73832	0.73832	0.824428
815	ZRANB2	0.0388731	0.200873	0.200873	0.328498
816	NEGR1	-0.0116807	0.0104112	0.0104112	0.0294994
817	LRRIQ3	0.00568849	0.456572	0.456572	0.595243
818	FPGT	0.0343723	0.248211	0.248211	0.385043
819	FPGT-TNNI3K	-0.00148545	0.64661	0.64661	0.755023
820	ERICH3	-0.0147702	8.38341e-110	1e-30	3.19842e-108
821	CRYZ	0.0167499	0.492205	0.492205	0.627401
822	TYW3	0.0471328	0.132452	0.132452	0.23912
823	ACADM	0.0678822	0.0229095	0.0229095	0.0574745
824	RABGGTB	-0.0044407	0.894633	0.894633	0.936117
825	MSH4	-0.00318003	0.54641	0.54641	0.674878
826	ST6GALNAC3	-0.0122386	0.578879	0.578879	0.701522
827	PIGK	0.111367	0.000143082	0.000143082	0.000643183
828	AK5	0.00965684	0.299626	0.299626	0.442929
829	AC118549.1	0.0139751	0.570452	0.570452	0.695085
830	USP33	0.0294052	0.311161	0.311161	0.455029
831	MIGA1	0.0819878	0.00955227	0.00955227	0.0273743
832	NEXN-AS1	-0.00375863	0.0475852	0.0475852	0.106152
833	NEXN	0.0375678	0.0735411	0.0735411	0.15071
834	FUBP1	-0.0536919	0.0655631	0.0655631	0.137366
835	DNAJB4	-0.038704	0.201966	0.201966	0.329753
836	GIPC2	-0.000528449	0.0325675	0.0325675	0.077464
837	AC103591.3	-0.320662	2.86311e-24	2.86311e-24	4.35774e-23
838	PTGFR	-0.0228317	0.00425	0.00425	0.0135981
839	IFI44L	-0.066576	0.0216213	0.0216213	0.0547159
840	IFI44	0.0233629	0.410542	0.410542	0.552538
841	LINC01781	-0.000598688	0.0016157	0.0016157	0.00576287
842	ADGRL2	-0.00358914	5.43651e-48	1e-30	1.22954e-46
843	LINC01725	0.00174646	0.8556	0.8556	0.910051
844	TTLL7	-0.0293707	0.000756827	0.000756827	0.00292968
845	AL359504.2	0.00775058	8.75362e-159	1e-30	5.25374e-157
846	PRKACB	0.131426	5.88076e-07	5.88076e-07	3.71119e-06
847	DNASE2B	0.0794978	0.00157831	0.00157831	0.00564553
848	RPF1	0.0714711	0.0232605	0.0232605	0.0582266
849	GNG5	0.0478197	0.119623	0.119623	0.221161
850	SPATA1	-0.00329097	0.900882	0.900882	0.940111
851	CTBS	0.105036	0.0005929	0.0005929	0.00235264
852	SSX2IP	-0.00391418	0.71024	0.71024	0.802838
853	LPAR3	-0.00956913	0.455201	0.455201	0.59411
854	MCOLN2	0.0200178	0.466377	0.466377	0.604382
855	WDR63	-0.000442807	0.844163	0.844163	0.901655
856	MCOLN3	0.0105421	0.577505	0.577505	0.700235
857	SYDE2	0.013368	0.0379078	0.0379078	0.0878232
858	C1orf52	-0.0432335	0.118696	0.118696	0.21969
859	BCL10	0.0146356	0.633326	0.633326	0.744789
860	AL078459.1	-0.000585883	0.961635	0.961635	0.978057
861	DDAH1	0.00241898	0.620579	0.620579	0.734357
862	CYR61	-0.00986278	0.153305	0.153305	0.267612
863	ZNHIT6	0.0229523	0.333532	0.333532	0.476651
864	COL24A1	-0.0256393	0.0536559	0.0536559	0.11705
865	AL136382.1	-0.00439773	2.62451e-68	1e-30	7.25838e-67
866	ODF2L	0.0139823	0.353625	0.353625	0.496958
867	CLCA2	-0.0050397	0.00768272	0.00768272	0.0226926
868	CLCA4	0.00399116	0.0334747	0.0334747	0.0793214
869	AL356270.1	-0.00613545	0.00103573	0.00103573	0.0038772
870	AL049597.2	0.012859	0.392464	0.392464	0.535157
871	SH3GLB1	0.22718	2.78721e-12	2.78721e-12	2.70201e-11
872	SELENOF	0.0525229	0.114815	0.114815	0.214263
873	HS2ST1	-0.0148462	0.593125	0.593125	0.712686
874	LINC01140	0.00698594	0.27661	0.27661	0.417657
875	AC099062.1	0.0187675	0.0200261	0.0200261	0.0513774
876	LMO4	0.172943	2.53003e-08	2.53003e-08	1.84307e-07
877	PKN2	-0.0117212	0.671799	0.671799	0.774273
878	GTF2B	0.0376862	0.214091	0.214091	0.344941
879	KYAT3	0.0446622	0.137273	0.137273	0.245795
880	RBMXL1	0.0333915	0.287512	0.287512	0.429921
881	GBP3	0.0472393	0.0839632	0.0839632	0.167394
882	GBP1	0.117731	0.00016288	0.00016288	0.000723887
883	GBP2	-0.108063	0.000185944	0.000185944	0.000817535
884	GBP7	-0.00371256	0.446455	0.446455	0.586694
885	GBP4	0.066609	0.0299788	0.0299788	0.0722899
886	AC099063.4	0.0177823	0.0642624	0.0642624	0.13511
887	GBP5	0.0127789	0.645485	0.645485	0.754258
888	AC099063.1	-0.00829408	0.156058	0.156058	0.271451
889	GBP6	0.00612426	0.211444	0.211444	0.341881
890	LRRC8B	-0.0285591	0.282613	0.282613	0.424417
891	LRRC8C-DT	-0.0176196	0.366342	0.366342	0.509664
892	LRRC8C	0.0251382	0.398518	0.398518	0.540734
893	AC099568.2	0.0238035	0.0319458	0.0319458	0.0763191
894	LRRC8D	0.0790858	0.00244305	0.00244305	0.00834238
895	ZNF326	0.0521468	0.0963468	0.0963468	0.186623
896	ZNF644	-0.134525	4.14633e-07	4.14633e-07	2.67285e-06
897	CDC7	0.0281672	0.0519003	0.0519003	0.113945
898	TGFBR3	0.0111679	0.126711	0.126711	0.231121
899	EPHX4	0.00775541	7.56232e-127	1e-30	3.31259e-125
900	SETSIP	0.0125529	0.0236909	0.0236909	0.0590759
901	BTBD8	0.00172359	0.909604	0.909604	0.944813
902	AC104836.1	0.0221747	1.15874e-27	1.15874e-27	1.92701e-26
903	GLMN	0.0447261	0.0145699	0.0145699	0.0392264
904	RPAP2	0.0854604	8.00471e-05	8.00471e-05	0.00037621
905	GFI1	0.025836	0.000605831	0.000605831	0.00240111
906	EVI5	0.0249865	0.461487	0.461487	0.599683
907	RPL5	0.339486	1.17029e-26	1.17029e-26	1.88994e-25
908	FAM69A	0.0826292	8.62248e-06	8.62248e-06	4.71225e-05
909	MTF2	-0.0336781	0.235575	0.235575	0.370791
910	TMED5	0.0370831	0.274239	0.274239	0.414949
911	CCDC18	-0.1472	2.09339e-07	2.09339e-07	1.3974e-06
912	DR1	-0.0111927	0.687511	0.687511	0.786073
913	FNBP1L	-0.000702463	0.953339	0.953339	0.97269
914	BCAR3	-0.0105869	0.5878	0.5878	0.708744
915	DNTTIP2	-0.0458601	0.113663	0.113663	0.212507
916	GCLM	0.105368	0.000304107	0.000304107	0.0012813
917	ABCA4	0.000175258	5.01002e-08	5.01002e-08	3.5394e-07
918	ARHGAP29	-0.0158257	2.60936e-08	2.60936e-08	1.89811e-07
919	AC097059.1	-0.000256141	0.118105	0.118105	0.218937
920	ABCD3	-0.0377723	0.0610653	0.0610653	0.129704
921	F3	0.0229135	0.391302	0.391302	0.533933
922	SLC44A3	-0.00677639	1.16986e-186	1e-30	1.65643e-184
923	CNN3	-0.00438361	0.0657293	0.0657293	0.137604
924	ALG14	0.0554687	0.0617563	0.0617563	0.130895
925	TMEM56	-0.00178722	0.713986	0.713986	0.806166
926	TMEM56-RWDD3	0.0191835	0.00550557	0.00550557	0.0170405
927	AC092802.1	-0.00523144	4.29865e-103	1e-30	1.58005e-101
928	RWDD3	0.0538136	0.067326	0.067326	0.140333
929	PTBP2	-0.0800271	0.00114999	0.00114999	0.00425264
930	DPYD	-0.144412	1.59295e-06	1.59295e-06	9.51513e-06
931	DPYD-AS1	0.00691079	0.390805	0.390805	0.533364
932	SNX7	0.012332	0.341643	0.341643	0.485172
933	LINC01708	0.00894297	2.89777e-176	1e-30	2.36839e-174
934	PALMD	-0.00746611	9.24076e-179	1e-30	8.11331e-177
935	FRRS1	0.0627979	0.00458463	0.00458463	0.0145346
936	AGL	0.0608166	0.0251094	0.0251094	0.06212
937	AC118553.1	-0.00305449	0.247343	0.247343	0.38408
938	SLC35A3	0.00991743	0.68929	0.68929	0.787153
939	AC118553.2	-0.010344	0.311376	0.311376	0.455212
940	MFSD14A	0.0387813	0.123702	0.123702	0.226909
941	SASS6	0.0758111	0.00219823	0.00219823	0.00759018
942	TRMT13	0.0485525	0.0567054	0.0567054	0.122337
943	LRRC39	0.0133901	0.0966676	0.0966676	0.187085
944	DBT	0.023767	0.309625	0.309625	0.453476
945	RTCA-AS1	0.071016	0.00412521	0.00412521	0.0132368
946	RTCA	0.0579819	0.0715536	0.0715536	0.147403
947	CDC14A	-0.0799695	3.39785e-06	3.39785e-06	1.95359e-05
948	VCAM1	0.0262727	0.00747614	0.00747614	0.0221835
949	EXTL2	0.00362318	0.829837	0.829837	0.891563
950	AC104506.1	-0.0828348	0.000546146	0.000546146	0.00218828
951	SLC30A7	-0.033909	0.247607	0.247607	0.384402
952	DPH5	0.0376856	0.119605	0.119605	0.22115
953	AC093157.2	0.00985702	0.0922274	0.0922274	0.180307
954	AC093157.1	0.03137	0.184924	0.184924	0.308606
955	AL109741.1	0.0106128	0.137409	0.137409	0.245972
956	S1PR1	0.0456249	0.000134975	0.000134975	0.000609434
957	RNPC3	-0.0285937	0.313632	0.313632	0.457735
958	AMY2B	-0.00388809	0.804696	0.804696	0.872797
959	AMY1B	5.02512e-06	0.96244	0.96244	0.978595
960	PRMT6	0.0129016	0.358347	0.358347	0.501596
961	VAV3	-0.0334484	0.236756	0.236756	0.372212
962	VAV3-AS1	-0.0093955	0.397351	0.397351	0.539697
963	AL390036.1	-0.0328812	0.328371	0.328371	0.471655
964	SLC25A24	0.179959	8.68906e-07	8.68906e-07	5.36885e-06
965	AL359258.2	-0.00892131	0.601189	0.601189	0.719374
966	FAM102B	-0.128032	0.000150482	0.000150482	0.000674115
967	HENMT1	0.0679916	0.00256591	0.00256591	0.00870867
968	PRPF38B	-0.0959445	0.000486746	0.000486746	0.00196833
969	FNDC7	0.000385064	0.884389	0.884389	0.928685
970	STXBP3	-0.0321735	0.251995	0.251995	0.389327
971	AKNAD1	0.00534024	0.625259	0.625259	0.738368
972	AL449266.1	0.0270316	0.0584993	0.0584993	0.12526
973	GPSM2	0.0197001	0.244019	0.244019	0.380299
974	CLCC1	0.0399316	0.178896	0.178896	0.30102
975	WDR47	-0.0637039	0.00277573	0.00277573	0.00933883
976	TAF13	-0.0802261	0.00620361	0.00620361	0.0188727
977	AL356488.3	-0.0345604	0.0276521	0.0276521	0.0675574
978	TMEM167B	-0.0679416	0.0258528	0.0258528	0.0637669
979	AL356488.2	-0.0159185	0.0880123	0.0880123	0.173607
980	C1orf194	-0.0292558	2.35103e-38	1e-30	4.74121e-37
981	KIAA1324	-0.00351268	0.569052	0.569052	0.69396
982	SARS	0.113798	0.000323234	0.000323234	0.00135338
983	CELSR2	0.0140488	0.030181	0.030181	0.0726904
984	PSRC1	0.0365496	0.00517609	0.00517609	0.01616
985	MYBPHL	-0.00132691	0.722605	0.722605	0.812885
986	SORT1	0.102095	0.00375723	0.00375723	0.0121824
987	PSMA5	0.233391	1.23859e-11	1.23859e-11	1.15882e-10
988	SYPL2	0.00635997	0.341685	0.341685	0.485198
989	ATXN7L2	-0.0221116	0.18614	0.18614	0.309992
990	CYB561D1	-0.0206208	0.397718	0.397718	0.539941
991	AMIGO1	0.00529154	0.00493699	0.00493699	0.0155186
992	GPR61	-0.00702128	0.0297673	0.0297673	0.0718662
993	GNAI3	-0.0527682	0.0691095	0.0691095	0.143234
994	GNAT2	0.0110239	0.000779258	0.000779258	0.00300725
995	AMPD2	-0.18856	3.88127e-15	3.88127e-15	4.31859e-14
996	GSTM4	0.0799441	0.00719548	0.00719548	0.0214679
997	GSTM2	0.0633183	0.00384985	0.00384985	0.0124566
998	GSTM1	0.202391	1.04343e-08	1.04343e-08	7.88988e-08
999	AC000032.1	0.0205091	0.122744	0.122744	0.225606
1000	GSTM5	0.00730337	0.025058	0.025058	0.0620387
1001	GSTM3	0.0165301	0.578385	0.578385	0.701049
1002	EPS8L3	-0.00207967	9.82087e-53	1e-30	2.33679e-51
1003	AL450468.1	-0.00872207	0.306306	0.306306	0.450091
1004	AL450468.2	-0.0327531	0.00599081	0.00599081	0.0183335
1005	CSF1	-0.0349802	0.162565	0.162565	0.279888
1006	AHCYL1	-0.0363253	0.238108	0.238108	0.373607
1007	STRIP1	-0.0300214	0.231974	0.231974	0.366369
1008	AL160006.1	-0.00302087	0.824602	0.824602	0.88774
1009	LINC02586	0.00547849	0.560162	0.560162	0.686578
1010	KCNC4	0.00372736	0.826678	0.826678	0.889262
1011	RBM15-AS1	-0.0242208	0.128668	0.128668	0.23359
1012	RBM15	0.0342624	0.183893	0.183893	0.307395
1013	SLC16A4	0.00521067	0.585931	0.585931	0.707084
1014	AL355488.1	-0.000592803	0.94946	0.94946	0.970301
1015	LAMTOR5	0.100108	0.00301711	0.00301711	0.0100235
1016	KCNA2	0.00234919	6.0886e-83	1e-30	1.88335e-81
1017	AL365361.1	-0.0862752	7.85046e-06	7.85046e-06	4.31025e-05
1018	KCNA3	-0.0507604	0.00389953	0.00389953	0.0125869
1019	CD53	-0.146781	4.35532e-07	4.35532e-07	2.79591e-06
1020	AL360270.1	-0.0332418	0.0138022	0.0138022	0.0374756
1021	LRIF1	0.0184277	0.547627	0.547627	0.675786
1022	AL360270.3	-0.0140076	0.54539	0.54539	0.674217
1023	DRAM2	-0.0133098	0.695274	0.695274	0.791662
1024	CEPT1	-0.0200168	0.514285	0.514285	0.64687
1025	AL355816.2	-0.00757459	0.617626	0.617626	0.732125
1026	DENND2D	0.0124409	0.647284	0.647284	0.75545
1027	CHI3L2	0.0231469	0.429205	0.429205	0.57074
1028	PIFO	-0.0205883	0.000680937	0.000680937	0.00266516
1029	OVGP1	-0.00391601	5.33099e-174	1e-30	4.18691e-172
1030	WDR77	0.0203535	0.477649	0.477649	0.614237
1031	ATP5PB	0.130849	0.000100599	0.000100599	0.000464975
1032	C1orf162	0.028944	0.432726	0.432726	0.573942
1033	TMIGD3	0.447312	1.23009e-21	1.23009e-21	1.73925e-20
1034	ADORA3	0.106217	5.40445e-06	5.40445e-06	3.02511e-05
1035	RAP1A	0.0239032	0.428494	0.428494	0.570058
1036	LINC01160	-0.0122594	0.0478854	0.0478854	0.106621
1037	INKA2	0.0362814	0.124264	0.124264	0.227753
1038	DDX20	0.000151441	0.994786	0.994786	0.997365
1039	KCND3	0.010279	0.135034	0.135034	0.242713
1040	CTTNBP2NL	0.0216225	0.547127	0.547127	0.675327
1041	WNT2B	-0.0332709	0.00915084	0.00915084	0.026397
1042	ST7L	-0.0426626	0.0962323	0.0962323	0.186419
1043	CAPZA1	-0.189855	2.71848e-11	2.71848e-11	2.49465e-10
1044	MOV10	0.00171255	0.951679	0.951679	0.971884
1045	AL603832.1	0.00432837	0.248715	0.248715	0.385676
1046	RHOC	0.186209	4.46639e-07	4.46639e-07	2.85991e-06
1047	PPM1J	0.0288648	0.0307354	0.0307354	0.0738576
1048	AL603832.2	-0.00705471	0.0309818	0.0309818	0.074343
1049	AL390729.1	0.00205682	0.654772	0.654772	0.761153
1050	SLC16A1	-0.0446358	0.0442159	0.0442159	0.100007
1051	SLC16A1-AS1	-0.00391275	0.848791	0.848791	0.904867
1052	AL357055.3	-0.00612495	0.18668	0.18668	0.310788
1053	LRIG2	-0.0234804	0.293078	0.293078	0.436307
1054	MAGI3	-0.013665	0.0263888	0.0263888	0.0649099
1055	PHTF1	0.0171155	0.454898	0.454898	0.593942
1056	RSBN1	-0.0352357	0.169221	0.169221	0.288752
1057	AL137856.1	0.0208561	2.06256e-05	2.06256e-05	0.000106197
1058	PTPN22	0.0241588	0.0634226	0.0634226	0.133708
1059	AP4B1-AS1	-0.00123227	0.641001	0.641001	0.750784
1060	BCL2L15	0.00508257	0.360475	0.360475	0.503803
1061	AP4B1	-0.0265048	0.26443	0.26443	0.403938
1062	DCLRE1B	0.0102547	0.744446	0.744446	0.828747
1063	HIPK1-AS1	-0.0220851	0.358499	0.358499	0.501678
1064	HIPK1	-0.0165323	0.594882	0.594882	0.714072
1065	OLFML3	0.00912074	0.683131	0.683131	0.782757
1066	SYT6	0.00329107	0.591719	0.591719	0.711634
1067	TRIM33	-0.133745	9.79164e-08	9.79164e-08	6.76067e-07
1068	BCAS2	0.143045	4.02741e-06	4.02741e-06	2.29326e-05
1069	DENND2C	0.00319897	0.747805	0.747805	0.831036
1070	AMPD1	-0.00456644	0.0144724	0.0144724	0.0390422
1071	NRAS	-0.044199	0.180424	0.180424	0.302907
1072	CSDE1	-0.160871	1.30406e-07	1.30406e-07	8.90905e-07
1073	SIKE1	0.102351	0.00120569	0.00120569	0.00443742
1074	TSPAN2	0.0110545	0.233836	0.233836	0.368687
1075	LINC01765	-0.00012107	0.132341	0.132341	0.238983
1076	VANGL1	0.0686899	3.86933e-05	3.86933e-05	0.000191712
1077	SLC22A15	0.0492832	0.123471	0.123471	0.226589
1078	MAB21L3	-0.000403864	0.965716	0.965716	0.980195
1079	ATP1A1	-0.00319998	0.921403	0.921403	0.952592
1080	LINC01762	-0.00955278	0.152751	0.152751	0.266853
1081	AL390066.1	-0.0399913	0.00566916	0.00566916	0.0174662
1082	CD58	0.167139	2.29007e-07	2.29007e-07	1.52212e-06
1083	IGSF3	-0.00821015	0.301145	0.301145	0.444521
1084	CD2	0.0913175	8.09427e-31	1e-30	1.42883e-29
1085	PTGFRN	-0.00842022	0.436731	0.436731	0.577577
1086	CD101	0.0508304	0.000788081	0.000788081	0.00303838
1087	AL445231.1	0.010523	2.92923e-112	1e-30	1.14359e-110
1088	TTF2	0.00552847	0.795315	0.795315	0.866136
1089	TRIM45	-0.0280319	0.02459	0.02459	0.061068
1090	VTCN1	0.00974613	1.2142e-190	1e-30	4.52085e-188
1091	AL358072.1	-0.00740943	0.0218068	0.0218068	0.055102
1092	MAN1A2	-0.119202	3.27823e-06	3.27823e-06	1.88751e-05
1093	AL157902.1	0.00234262	0.215082	0.215082	0.345927
1094	TENT5C	0.0443362	0.000263498	0.000263498	0.00112673
1095	GDAP2	-0.00242544	0.939456	0.939456	0.963955
1096	WDR3	-0.00406581	0.842666	0.842666	0.900677
1097	SPAG17	-0.0110726	0.00149027	0.00149027	0.00535921
1098	WARS2	-0.0351397	0.127012	0.127012	0.231548
1099	AL359915.2	-0.030472	0.0946769	0.0946769	0.184151
1100	ZNF697	-0.0775508	0.0157381	0.0157381	0.0418669
1101	PHGDH	0.00600543	0.682049	0.682049	0.782007
1102	NOTCH2	-0.263607	1.53883e-22	1.53883e-22	2.24201e-21
1103	SEC22B	-0.222404	1.31594e-20	1.31594e-20	1.80357e-19
1104	NBPF26	-0.25658	4.14879e-22	4.14879e-22	5.95401e-21
1105	PPIAL4A	-0.00191142	0.468759	0.468759	0.606546
1106	LINC00623	0.0157297	0.520534	0.520534	0.652078
1107	FCGR1B	0.00923721	0.778803	0.778803	0.853796
1108	AC244453.3	0.00758335	0.631496	0.631496	0.74326
1109	AC244453.2	0.00592869	0.691215	0.691215	0.788649
1110	FAM72B	0.037662	0.0419482	0.0419482	0.0956357
1111	SRGAP2C	0.0565536	0.0957041	0.0957041	0.185629
1112	SRGAP2-AS1	0.0210275	0.0374278	0.0374278	0.0869065
1113	AC244021.1	-0.00260828	0.376404	0.376404	0.519173
1114	AL592494.1	9.58239e-05	0.979557	0.979557	0.988108
1115	AC239800.2	0.0309186	0.00510104	0.00510104	0.0159679
1116	AC239800.3	-0.0168321	0.14086	0.14086	0.25092
1117	AC239798.2	-0.0100208	0.400797	0.400797	0.54302
1118	HIST2H3PS2	0.00295413	0.114581	0.114581	0.21397
1119	FAM72C	0.0142416	0.0274786	0.0274786	0.0672122
1120	AC245595.1	0.0307157	0.137796	0.137796	0.246576
1121	PPIAL4E	0.0060924	0.0617445	0.0617445	0.130884
1122	AC246785.3	0.0217544	0.0908977	0.0908977	0.178162
1123	NBPF15	-0.0870677	0.000610197	0.000610197	0.00241461
1124	FP700111.1	-0.0062158	0.497979	0.497979	0.632692
1125	SRGAP2B	0.0793825	0.0242491	0.0242491	0.0603258
1126	FAM72D	0.0164571	0.131916	0.131916	0.238388
1127	AC245014.3	-0.490497	4.16227e-67	1e-30	1.13859e-65
1128	AC245014.1	0.00256796	0.625807	0.625807	0.738624
1129	NBPF20	-0.101337	5.46536e-07	5.46536e-07	3.46645e-06
1130	GPR89A	0.00996358	0.654287	0.654287	0.760894
1131	PDZK1	0.0205188	0.000231274	0.000231274	0.001
1132	CD160	-0.0034791	0.0624721	0.0624721	0.132116
1133	RNF115	0.13178	2.61091e-05	2.61091e-05	0.000132429
1134	POLR3C	0.00233427	0.933877	0.933877	0.960338
1135	NUDT17	0.00510908	0.748619	0.748619	0.831404
1136	PIAS3	0.00425831	0.836899	0.836899	0.896533
1137	ANKRD35	0.00397289	0.429553	0.429553	0.571015
1138	ITGA10	0.00556734	0.468582	0.468582	0.606496
1139	PEX11B	0.0476411	0.09131	0.09131	0.178796
1140	RBM8A	0.134202	6.31847e-05	6.31847e-05	0.000301684
1141	LIX1L-AS1	-0.0118863	0.190823	0.190823	0.316193
1142	LIX1L	-0.0396667	0.136811	0.136811	0.245163
1143	ANKRD34A	0.00717563	0.511861	0.511861	0.645032
1144	AC243547.2	0.00417265	7.75508e-80	1e-30	2.34825e-78
1145	POLR3GL	0.163597	2.13948e-07	2.13948e-07	1.42674e-06
1146	TXNIP	-0.23738	5.6059e-24	5.6059e-24	8.50017e-23
1147	NBPF10	-0.161687	5.36159e-10	5.36159e-10	4.50858e-09
1148	AC239799.1	-0.000674304	0.912412	0.912412	0.946202
1149	NOTCH2NL	-0.194979	7.88932e-16	7.88932e-16	9.0538e-15
1150	AC239799.2	0.00342917	0.750964	0.750964	0.833201
1151	AC243756.1	-0.0135255	0.164093	0.164093	0.281939
1152	NBPF12	-0.0769154	0.00617134	0.00617134	0.0187865
1153	PRKAB2	0.0275773	0.261523	0.261523	0.400531
1154	AC242426.2	0.0133609	0.430422	0.430422	0.571861
1155	FMO5	-0.00891168	0.387722	0.387722	0.530531
1156	CHD1L	0.0366234	0.216087	0.216087	0.347254
1157	LINC00624	0.0123768	0.00016993	0.00016993	0.000752392
1158	BCL9	-0.0576562	1.24805e-05	1.24805e-05	6.64898e-05
1159	ACP6	-0.0489061	1.44366e-07	1.44366e-07	9.82273e-07
1160	GPR89B	0.0129064	0.476436	0.476436	0.613384
1161	NBPF11	-0.0358611	0.160532	0.160532	0.277314
1162	AC239809.3	-0.00398282	0.52856	0.52856	0.659094
1163	PPIAL4G	-0.0607495	9.62146e-06	9.62146e-06	5.21426e-05
1164	NBPF14	-0.228465	4.87661e-17	4.87661e-17	5.91369e-16
1165	NUDT4B	-0.00667235	0.470515	0.470515	0.607902
1166	PDE4DIP	-0.41074	1.43273e-40	1e-30	2.96059e-39
1167	AC239804.1	0.00124606	0.786094	0.786094	0.859445
1168	NBPF9	-0.115545	1.59817e-05	1.59817e-05	8.37664e-05
1169	AC245297.3	0.0155416	0.582242	0.582242	0.704154
1170	AC245297.2	0.00408985	0.541372	0.541372	0.670826
1171	NBPF19	-0.166658	1.63846e-10	1.63846e-10	1.42795e-09
1172	PPIAL4C	-0.0043795	0.0967384	0.0967384	0.187183
1173	FCGR1A	0.0051919	0.875228	0.875228	0.923074
1174	HIST2H2BF	-0.00686307	0.770859	0.770859	0.84768
1175	AC243772.2	-0.0050173	0.708142	0.708142	0.801187
1176	HIST2H3D	0.00243111	0.846773	0.846773	0.903673
1177	HIST2H4A	0.00978454	0.413893	0.413893	0.555708
1178	HIST2H2AA3	-0.149171	4.92807e-08	4.92807e-08	3.48499e-07
1179	AC239868.3	-0.00520858	0.608716	0.608716	0.725222
1180	HIST2H2AA4	0.0360261	0.233406	0.233406	0.368211
1181	HIST2H3A	0.00273262	0.604201	0.604201	0.721596
1182	HIST2H4B	0.039182	0.016176	0.016176	0.0428165
1183	AC239868.2	0.00488657	0.605733	0.605733	0.722757
1184	HIST2H2BE	-0.0908588	0.000266416	0.000266416	0.001138
1185	HIST2H2AC	-0.119304	1.32623e-06	1.32623e-06	8.01718e-06
1186	HIST2H2AB	0.047251	0.0218992	0.0218992	0.0553216
1187	BOLA1	0.0270508	0.232808	0.232808	0.367367
1188	SV2A	0.00102975	0.861093	0.861093	0.913815
1189	SF3B4	0.0756777	0.0166552	0.0166552	0.0438426
1190	MTMR11	0.0022864	0.940815	0.940815	0.964732
1191	OTUD7B	0.0331545	0.0202077	0.0202077	0.0517541
1192	VPS45	-0.0257684	0.315879	0.315879	0.459722
1193	PLEKHO1	0.114111	0.00199221	0.00199221	0.00695165
1194	ANP32E	0.0519349	0.0452191	0.0452191	0.101789
1195	APH1A	-0.0320364	0.322104	0.322104	0.465673
1196	C1orf54	0.140902	0.000379617	0.000379617	0.00156662
1197	CIART	-0.0253905	0.00591775	0.00591775	0.0181458
1198	MRPS21	0.18476	2.91688e-08	2.91688e-08	2.11492e-07
1199	PRPF3	-0.0559221	0.0486145	0.0486145	0.107981
1200	RPRD2	-0.0106275	0.646813	0.646813	0.755172
1201	TARS2	0.00306043	0.890545	0.890545	0.933394
1202	ECM1	0.0938889	0.00202774	0.00202774	0.00706581
1203	FALEC	0.000852706	0.903994	0.903994	0.941566
1204	AL356356.1	-0.0082372	0.561731	0.561731	0.687872
1205	ADAMTSL4	-0.23216	4.57092e-16	4.57092e-16	5.30617e-15
1206	MCL1	-0.472622	2.42709e-65	1e-30	6.54143e-64
1207	ENSA	0.0812714	0.00677319	0.00677319	0.020356
1208	GOLPH3L	-0.000170768	0.991926	0.991926	0.995879
1209	HORMAD1	-0.00110596	0.914385	0.914385	0.947739
1210	CTSS	0.376678	1.06614e-32	1e-30	1.95048e-31
1211	CTSK	0.410309	1.28501e-18	1.28501e-18	1.65406e-17
1212	ARNT	-0.0143732	0.630882	0.630882	0.742783
1213	SETDB1	-0.0179778	0.534745	0.534745	0.66495
1214	CERS2	-0.0789286	0.00933837	0.00933837	0.0268685
1215	AL590133.1	0.0033172	0.549947	0.549947	0.677799
1216	ANXA9	0.00867168	0.00119729	0.00119729	0.00440972
1217	MINDY1	-0.0265475	0.228489	0.228489	0.362503
1218	PRUNE1	0.0185165	0.407936	0.407936	0.54995
1219	BNIPL	0.00256952	0.795778	0.795778	0.866499
1220	C1orf56	-0.00119203	0.933014	0.933014	0.959598
1221	CDC42SE1	-0.118404	9.94845e-06	9.94845e-06	5.37698e-05
1222	MLLT11	-0.134458	2.86757e-10	2.86757e-10	2.45446e-09
1223	GABPB2	0.0279037	0.296835	0.296835	0.440391
1224	SEMA6C	0.0120133	0.192804	0.192804	0.318531
1225	TNFAIP8L2	-0.0158073	0.637721	0.637721	0.74818
1226	SCNM1	0.152178	9.6416e-06	9.6416e-06	5.22377e-05
1227	LYSMD1	0.0151793	0.0247752	0.0247752	0.0614506
1228	VPS72	0.035924	0.22778	0.22778	0.361702
1229	PIP5K1A	-0.0605204	0.0225824	0.0225824	0.0567907
1230	PSMD4	0.152342	4.88235e-06	4.88235e-06	2.74663e-05
1231	AL391069.2	-0.048457	0.0267147	0.0267147	0.065559
1232	ZNF687	-0.118852	1.85254e-08	1.85254e-08	1.36938e-07
1233	PI4KB	-0.113248	0.00014309	0.00014309	0.000643183
1234	RFX5	-0.052915	0.0666275	0.0666275	0.139137
1235	AL391069.1	0.0253045	2.66129e-19	2.66129e-19	3.50413e-18
1236	AL391069.3	-0.0617152	0.00963321	0.00963321	0.0275866
1237	SELENBP1	-0.0174026	1.202e-169	1e-30	8.60049e-168
1238	PSMB4	-0.0126007	0.698016	0.698016	0.793368
1239	POGZ	-0.0600521	0.0235582	0.0235582	0.0588106
1240	CGN	-0.00288976	0.499185	0.499185	0.633745
1241	TUFT1	-0.0520441	0.00212568	0.00212568	0.00736878
1242	SNX27	-0.0663451	0.0187189	0.0187189	0.0485191
1243	AL391335.1	0.00730978	0.412608	0.412608	0.554538
1244	RIIAD1	-0.00720996	5.47027e-166	1e-30	3.66617e-164
1245	AL589765.7	0.0138051	0.150321	0.150321	0.2635
1246	MRPL9	0.0657733	0.0190505	0.0190505	0.0492517
1247	OAZ3	0.0135659	0.476209	0.476209	0.613254
1248	AL589765.4	0.0299013	0.0445319	0.0445319	0.100568
1249	TDRKH	0.0149562	0.317932	0.317932	0.461874
1250	TDRKH-AS1	0.00243461	0.7318	0.7318	0.819559
1251	RORC	0.00486517	0.0105503	0.0105503	0.0298347
1252	C2CD4D	-0.00196811	0.294074	0.294074	0.437351
1253	THEM4	0.0643165	0.00574636	0.00574636	0.0176715
1254	S100A10	0.718422	1.52251e-155	1e-30	8.67181e-154
1255	S100A11	0.387654	4.44569e-71	1e-30	1.25717e-69
1256	TCHH	0.0611	0.0187572	0.0187572	0.0486057
1257	CRCT1	-0.00391936	1.76294e-81	1e-30	5.39509e-80
1258	SPRR1A	0.00824787	1.46639e-96	1e-30	5.02269e-95
1259	SPRR3	0.00207579	0.674396	0.674396	0.775856
1260	SPRR1B	-0.00541608	0.0591065	0.0591065	0.126304
1261	SPRR2D	-0.00335709	0.154906	0.154906	0.269961
1262	SPRR2A	0.00450327	0.0388808	0.0388808	0.0896693
1263	SPRR2E	0.00446832	0.358445	0.358445	0.501663
1264	SPRR2F	0.000405644	0.0480389	0.0480389	0.106927
1265	LOR	0.00146388	0.874948	0.874948	0.922917
1266	PGLYRP4	0.00608298	0.00126866	0.00126866	0.00465554
1267	S100A9	-0.222114	1.10515e-14	1.10515e-14	1.1985e-13
1268	S100A12	-0.0962888	0.00146092	0.00146092	0.00526779
1269	S100A8	-0.095806	0.00207403	0.00207403	0.00720839
1270	S100A7	-0.0048331	0.0111767	0.0111767	0.0312544
1271	BX470102.1	0.000148048	0.963516	0.963516	0.978901
1272	S100A6	0.410433	3.96524e-54	1e-30	9.58234e-53
1273	S100A5	0.0103264	0.345571	0.345571	0.489024
1274	S100A4	0.216545	1.35607e-12	1.35607e-12	1.33652e-11
1275	S100A3	0.0121012	0.498864	0.498864	0.633497
1276	S100A2	-0.0147135	0.179264	0.179264	0.301462
1277	S100A16	-0.0184657	0.000215198	0.000215198	0.000934304
1278	S100A14	-0.0158774	0.00185159	0.00185159	0.00651069
1279	S100A13	0.220353	6.3399e-16	6.3399e-16	7.32587e-15
1280	S100A1	-0.00523433	0.160851	0.160851	0.277746
1281	AL162258.2	-0.040791	0.0207918	0.0207918	0.0530036
1282	CHTOP	-0.0633251	0.0301057	0.0301057	0.0725437
1283	SNAPIN	0.141266	7.22315e-05	7.22315e-05	0.000341875
1284	ILF2	0.0699258	0.034446	0.034446	0.0810784
1285	NPR1	0.00182177	0.745003	0.745003	0.828926
1286	INTS3	-0.0110269	0.68738	0.68738	0.786063
1287	SLC27A3	-0.0516481	0.0775141	0.0775141	0.157107
1288	GATAD2B	0.0178488	0.508738	0.508738	0.642275
1289	AL358472.5	-0.0120497	0.438948	0.438948	0.579861
1290	DENND4B	-0.110983	7.16954e-05	7.16954e-05	0.000339498
1291	CRTC2	-0.127723	3.60248e-07	3.60248e-07	2.34103e-06
1292	SLC39A1	-0.0761249	0.013632	0.013632	0.0370836
1293	AL358472.4	-0.0232771	0.0978674	0.0978674	0.188895
1294	AL358472.3	-0.0133932	0.243399	0.243399	0.379745
1295	CREB3L4	0.0145737	0.379483	0.379483	0.522568
1296	JTB	0.101116	0.00176729	0.00176729	0.00624812
1297	AL358472.2	0.00516025	0.569588	0.569588	0.694364
1298	RAB13	0.351027	4.18897e-20	4.18897e-20	5.63367e-19
1299	RPS27	-0.499087	5.79799e-66	1e-30	1.57108e-64
1300	NUP210L	-0.00293159	0.26652	0.26652	0.406248
1301	TPM3	-0.133899	1.77147e-05	1.77147e-05	9.20814e-05
1302	C1orf189	-0.0119661	1.10245e-06	1.10245e-06	6.72101e-06
1303	C1orf43	-0.113453	9.89092e-05	9.89092e-05	0.000457481
1304	UBAP2L	-0.0616089	0.0241696	0.0241696	0.0601578
1305	HAX1	0.148406	4.48936e-06	4.48936e-06	2.54334e-05
1306	ATP8B2	0.00742772	0.589602	0.589602	0.71015
1307	IL6R-AS1	-0.111232	1.7875e-08	1.7875e-08	1.32325e-07
1308	IL6R	-0.269209	2.92175e-23	2.92175e-23	4.35792e-22
1309	SHE	-0.000814135	0.827637	0.827637	0.889922
1310	AL162591.2	-0.0069063	0.301293	0.301293	0.444656
1311	UBE2Q1	-0.039882	0.178337	0.178337	0.300374
1312	ADAR	-0.0988206	0.000296971	0.000296971	0.00125518
1313	KCNN3	0.00901471	0.255226	0.255226	0.393193
1314	PMVK	0.0617915	0.0401374	0.0401374	0.0921762
1315	AL451085.1	-0.0141223	0.142294	0.142294	0.252914
1316	PBXIP1	0.0590991	0.000113142	0.000113142	0.00051701
1317	PYGO2	-0.0356384	0.0573665	0.0573665	0.123399
1318	AL451085.2	0.00637778	0.389461	0.389461	0.532144
1319	SHC1	-0.097002	0.00179837	0.00179837	0.0063435
1320	CKS1B	0.0183102	0.460104	0.460104	0.598312
1321	FLAD1	0.0236827	0.387439	0.387439	0.530318
1322	ZBTB7B	-0.0850579	0.00010626	0.00010626	0.000488559
1323	DCST1	-0.00694543	0.210219	0.210219	0.340256
1324	DCST1-AS1	-0.00798987	0.000178129	0.000178129	0.00078558
1325	ADAM15	-0.0503601	0.0768577	0.0768577	0.156201
1326	EFNA4	-0.0349442	0.0514898	0.0514898	0.113229
1327	EFNA3	-0.00457203	0.536047	0.536047	0.665787
1328	EFNA1	-0.0259281	0.00284655	0.00284655	0.00953722
1329	SLC50A1	-0.0102588	0.750575	0.750575	0.832983
1330	DPM3	-0.0240506	0.458298	0.458298	0.596889
1331	KRTCAP2	0.308872	5.39609e-19	5.39609e-19	7.03592e-18
1332	TRIM46	0.0125981	0.0626506	0.0626506	0.132386
1333	MUC1	-0.00223713	0.833491	0.833491	0.894103
1334	AC234582.1	0.011923	0.235817	0.235817	0.371084
1335	THBS3	0.00448508	0.865229	0.865229	0.916414
1336	MTX1	0.118566	0.000298779	0.000298779	0.0012615
1337	AC234582.2	0.0198607	0.164541	0.164541	0.282517
1338	GBA	0.142831	4.67407e-05	4.67407e-05	0.000228266
1339	FAM189B	-0.00519708	0.825378	0.825378	0.888338
1340	SCAMP3	0.117053	0.000575803	0.000575803	0.00229204
1341	CLK2	-0.0430744	0.142228	0.142228	0.252858
1342	HCN3	0.0246032	0.0669375	0.0669375	0.139668
1343	FDPS	0.0462298	0.0884408	0.0884408	0.174315
1344	RUSC1-AS1	-0.0279152	0.0499094	0.0499094	0.110342
1345	RUSC1	-0.00247035	0.928401	0.928401	0.956703
1346	ASH1L	-0.128296	1.15606e-06	1.15606e-06	7.03288e-06
1347	ASH1L-AS1	-0.0244082	0.373435	0.373435	0.516353
1348	AL353807.2	-0.00962463	0.00301231	0.00301231	0.0100108
1349	MSTO1	-0.0107225	0.6654	0.6654	0.769765
1350	YY1AP1	-0.0923316	0.000466261	0.000466261	0.00189119
1351	DAP3	0.035735	0.259337	0.259337	0.398011
1352	GON4L	-0.0953484	0.000130057	0.000130057	0.000589082
1353	SYT11	0.0249369	0.409759	0.409759	0.551817
1354	RIT1	-0.097595	0.000528882	0.000528882	0.00212717
1355	KHDC4	-0.0641797	0.00810428	0.00810428	0.023708
1356	ARHGEF2	-0.277738	3.31784e-24	3.31784e-24	5.04221e-23
1357	AL355388.2	-0.0208828	0.243074	0.243074	0.379445
1358	AL355388.1	0.0136236	0.0506634	0.0506634	0.111668
1359	SSR2	-0.00280987	0.928976	0.928976	0.956963
1360	UBQLN4	-0.123456	1.75945e-06	1.75945e-06	1.04476e-05
1361	LAMTOR2	0.118465	0.000801621	0.000801621	0.00308467
1362	RAB25	-0.0140868	3.18173e-30	3.18173e-30	5.55311e-29
1363	MEX3A	0.000134932	0.942342	0.942342	0.965586
1364	LMNA	-0.183396	3.42629e-08	3.42629e-08	2.46649e-07
1365	SEMA4A	-0.158444	2.95786e-08	2.95786e-08	2.14309e-07
1366	SLC25A44	-0.104207	0.000136815	0.000136815	0.000617186
1367	PMF1-BGLAP	-0.0204032	0.139551	0.139551	0.249062
1368	PMF1	0.0424687	0.172951	0.172951	0.293472
1369	BGLAP	-0.00129256	0.891366	0.891366	0.933816
1370	PAQR6	-0.0177617	0.277913	0.277913	0.419278
1371	SMG5	-0.156782	1.40303e-09	1.40303e-09	1.14161e-08
1372	TMEM79	0.0245761	0.291385	0.291385	0.434485
1373	GLMP	0.0851423	0.0159953	0.0159953	0.0424332
1374	CCT3	0.122845	8.94531e-05	8.94531e-05	0.000416657
1375	TSACC	0.012738	0.161236	0.161236	0.278244
1376	C1orf61	-0.0659184	1.20157e-05	1.20157e-05	6.41668e-05
1377	AL139412.1	-0.00330909	0.589545	0.589545	0.710124
1378	MEF2D	-0.138932	3.06885e-07	3.06885e-07	2.01116e-06
1379	IQGAP3	0.0153953	0.214872	0.214872	0.345701
1380	TTC24	0.0323826	2.36067e-191	1e-30	2.77777e-188
1381	NAXE	0.203448	7.72039e-10	7.72039e-10	6.41696e-09
1382	GPATCH4	0.0247419	0.430474	0.430474	0.571861
1383	BCAN	-0.00425655	0.506697	0.506697	0.64029
1384	AL590666.2	0.0027997	0.290328	0.290328	0.433166
1385	NES	0.0285088	3.76652e-07	3.76652e-07	2.44289e-06
1386	CRABP2	-0.00528536	0.655161	0.655161	0.761338
1387	ISG20L2	-0.0782776	0.00246388	0.00246388	0.0084021
1388	RRNAD1	-0.0591917	0.012046	0.012046	0.0333284
1389	MRPL24	0.186215	1.5304e-07	1.5304e-07	1.03813e-06
1390	HDGF	-0.12029	4.14737e-05	4.14737e-05	0.00020438
1391	PRCC	-0.0351756	0.251103	0.251103	0.388359
1392	SH2D2A	0.10147	9.96889e-19	9.96889e-19	1.28814e-17
1393	NTRK1	0.00912257	0.0167081	0.0167081	0.0439587
1394	LRRC71	-0.0111605	2.18035e-07	2.18035e-07	1.45352e-06
1395	ARHGEF11	-0.0102969	0.739558	0.739558	0.825077
1396	ETV3L	-0.0150865	0.292854	0.292854	0.436157
1397	ETV3	-0.220252	5.97618e-13	5.97618e-13	6.00785e-12
1398	FCRL5	0.00814099	3.04236e-31	1e-30	5.40846e-30
1399	FCRL4	-0.001107	4.94289e-111	1e-30	1.90752e-109
1400	FCRL3	0.00837637	3.66973e-31	1e-30	6.50649e-30
1401	FCRL2	0.0124135	5.29287e-06	5.29287e-06	2.96595e-05
1402	FCRL1	0.00229783	0.000111969	0.000111969	0.000512114
1403	CD5L	0.0438828	0.000693608	0.000693608	0.0027079
1404	CD1D	-0.0694531	0.00134483	0.00134483	0.00490196
1405	AL138899.1	0.00880863	0.455049	0.455049	0.59399
1406	CD1A	0.0240678	0.132166	0.132166	0.238711
1407	CD1C	-0.00281212	0.904557	0.904557	0.941937
1408	CD1B	0.00378966	0.801706	0.801706	0.870543
1409	CD1E	-0.0032955	0.860722	0.860722	0.913518
1410	SPTA1	-0.0039039	0.349849	0.349849	0.493411
1411	OR6N1	0.0513827	0.00351991	0.00351991	0.0114944
1412	MNDA	-0.0849726	0.00250161	0.00250161	0.00851488
1413	PYHIN1	0.0529084	1.37155e-13	1.37155e-13	1.42073e-12
1414	IFI16	-0.00775189	0.776661	0.776661	0.852331
1415	AIM2	0.0653428	0.01234	0.01234	0.0340199
1416	FCER1A	-0.0248837	0.0447678	0.0447678	0.100987
1417	OR10J1	0.00296397	0.59212	0.59212	0.711776
1418	DUSP23	0.139979	9.57788e-05	9.57788e-05	0.00044433
1419	FCRL6	0.00692058	0.363146	0.363146	0.506444
1420	SLAMF8	0.208874	1.7453e-07	1.7453e-07	1.17715e-06
1421	AL590560.1	-0.00120737	0.926891	0.926891	0.955941
1422	VSIG8	-0.0198242	0.0362789	0.0362789	0.0846592
1423	AL590560.2	0.00507241	0.227383	0.227383	0.361375
1424	CFAP45	-0.0254614	0.0103202	0.0103202	0.0292976
1425	TAGLN2	0.120184	9.69955e-05	9.69955e-05	0.000449353
1426	IGSF9	0.00021482	0.96555	0.96555	0.980125
1427	SLAMF9	0.151583	0.000111821	0.000111821	0.000511551
1428	LINC01133	0.00772636	0.139548	0.139548	0.249062
1429	KCNJ10	-0.00045257	0.961663	0.961663	0.978057
1430	PIGM	-0.00763476	0.751202	0.751202	0.833398
1431	IGSF8	0.00373907	0.870567	0.870567	0.9195
1432	ATP1A4	0.0513724	0.00285511	0.00285511	0.00956427
1433	CASQ1	-0.000262245	0.954387	0.954387	0.973463
1434	AL121987.2	-0.0361727	0.0753806	0.0753806	0.153806
1435	PEA15	-0.234161	1.6022e-11	1.6022e-11	1.48793e-10
1436	DCAF8	-0.089237	0.000802411	0.000802411	0.00308653
1437	AL139011.2	0.0156381	0.00136341	0.00136341	0.0049589
1438	AL139011.1	-0.0154264	0.366473	0.366473	0.509799
1439	PEX19	0.0354697	0.286331	0.286331	0.428584
1440	COPA	0.0235355	0.454044	0.454044	0.593024
1441	NCSTN	0.0122937	0.687425	0.687425	0.786063
1442	NHLH1	-0.022083	0.0237521	0.0237521	0.0592066
1443	VANGL2	-0.00100736	0.702974	0.702974	0.797
1444	SLAMF6	0.0225344	0.00681747	0.00681747	0.0204707
1445	CD84	-0.229879	4.47424e-12	4.47424e-12	4.28581e-11
1446	SLAMF1	0.204615	4.14262e-09	4.14262e-09	3.23022e-08
1447	AL121985.1	-0.0196671	0.437124	0.437124	0.577984
1448	CD48	-0.245668	2.98012e-18	2.98012e-18	3.76608e-17
1449	SLAMF7	-0.210537	8.64365e-14	8.64365e-14	9.0421e-13
1450	LY9	-0.0417135	0.0517995	0.0517995	0.113761
1451	CD244	-0.0293618	0.12706	0.12706	0.231548
1452	ITLN1	-0.0201412	0.0573292	0.0573292	0.12335
1453	F11R	0.0818871	0.00491976	0.00491976	0.0154751
1454	AL591806.3	-0.000990991	0.876066	0.876066	0.923466
1455	TSTD1	0.0565348	0.0124734	0.0124734	0.0343526
1456	USF1	-0.0420078	0.161461	0.161461	0.278583
1457	ARHGAP30	-0.114702	1.65183e-05	1.65183e-05	8.63316e-05
1458	NECTIN4	-0.00750643	0.517534	0.517534	0.649696
1459	AL591806.1	0.0274581	3.48694e-06	3.48694e-06	2.00138e-05
1460	KLHDC9	-0.00528407	0.138458	0.138458	0.247518
1461	PFDN2	0.100362	0.00213838	0.00213838	0.0074077
1462	NIT1	0.0820868	0.0088965	0.0088965	0.0257483
1463	DEDD	0.0678014	0.0323824	0.0323824	0.0771459
1464	UFC1	0.235414	1.22893e-14	1.22893e-14	1.33201e-13
1465	AL590714.1	0.000810476	0.899514	0.899514	0.939025
1466	USP21	-0.00583629	0.755136	0.755136	0.836358
1467	PPOX	0.0103565	0.415477	0.415477	0.55724
1468	B4GALT3	0.0216998	0.462355	0.462355	0.600601
1469	ADAMTS4	-0.00399892	0.617616	0.617616	0.732125
1470	NDUFS2	0.192573	5.78652e-09	5.78652e-09	4.4542e-08
1471	FCER1G	0.259252	2.17377e-35	1e-30	4.18638e-34
1472	APOA2	-0.00727969	0.164034	0.164034	0.281863
1473	TOMM40L	-0.0836096	0.000321385	0.000321385	0.00134704
1474	NR1I3	0.00172127	0.851113	0.851113	0.906402
1475	PCP4L1	-0.00453383	0.385185	0.385185	0.528096
1476	MPZ	-0.057822	5.96826e-05	5.96826e-05	0.000286325
1477	SDHC	0.12555	0.000189151	0.000189151	0.000830004
1478	CFAP126	-0.0178845	1.38366e-17	1.38366e-17	1.70779e-16
1479	AL592295.4	-0.0301146	0.0582005	0.0582005	0.12475
1480	AL831711.1	0.0324865	6.05077e-06	6.05077e-06	3.3644e-05
1481	FCGR2A	-0.159412	4.41032e-08	4.41032e-08	3.13779e-07
1482	HSPA6	-0.269333	3.23705e-18	3.23705e-18	4.08051e-17
1483	FCGR3A	0.0210444	0.546086	0.546086	0.674698
1484	FCGR3B	-0.13599	6.36608e-14	6.36608e-14	6.7084e-13
1485	FCGR2B	-0.0980962	0.00405771	0.00405771	0.0130347
1486	AL451067.1	-0.00650913	0.000527095	0.000527095	0.00212083
1487	FCRLA	-0.0112434	0.0490396	0.0490396	0.108697
1488	FCRLB	-0.0413635	0.0928557	0.0928557	0.181205
1489	DUSP12	0.0248732	0.35556	0.35556	0.498875
1490	AL359541.1	-0.0856197	1.14856e-07	1.14856e-07	7.88153e-07
1491	ATF6	-0.102178	0.000930441	0.000930441	0.00352838
1492	OLFML2B	0.111112	0.00581374	0.00581374	0.0178678
1493	AL590408.1	0.0215418	8.51795e-15	8.51795e-15	9.30266e-14
1494	NOS1AP	0.0139105	0.127267	0.127267	0.231799
1495	C1orf226	-0.00791093	0.182991	0.182991	0.306066
1496	SH2D1B	0.000946523	0.616893	0.616893	0.731531
1497	UHMK1	0.0047219	0.869699	0.869699	0.918825
1498	AL596325.1	-0.000721516	0.945288	0.945288	0.967476
1499	UAP1	-0.0622603	0.0194038	0.0194038	0.050017
1500	DDR2	-0.00995138	0.249545	0.249545	0.386633
1501	HSD17B7	0.0303763	0.264137	0.264137	0.403582
1502	CCDC190	-0.0152553	1.86834e-181	1e-30	1.86889e-179
1503	RGS4	-0.0026668	0.154772	0.154772	0.269752
1504	RGS5	0.00148324	0.851403	0.851403	0.906642
1505	RGS5-1	0.00909772	0.477113	0.477113	0.613824
1506	NUF2	0.0430825	3.03742e-11	3.03742e-11	2.77593e-10
1507	PBX1	0.0106373	0.0292018	0.0292018	0.0707642
1508	AL356441.1	-0.0320714	0.0240498	0.0240498	0.0598744
1509	MGST3	0.783833	2.11198e-93	1e-30	7.04202e-92
1510	ALDH9A1	0.0822991	0.0083782	0.0083782	0.0244275
1511	TMCO1	0.0914467	0.00462988	0.00462988	0.0146527
1512	AL451074.2	-0.00103071	0.934127	0.934127	0.960497
1513	UCK2	0.0685733	0.0307002	0.0307002	0.0737993
1514	AL358115.1	0.0112202	5.03312e-09	5.03312e-09	3.88617e-08
1515	LINC01675	-0.00828425	0.0700143	0.0700143	0.144781
1516	POGK	-0.00664178	0.827183	0.827183	0.889615
1517	TADA1	0.0273681	0.0674645	0.0674645	0.140506
1518	ILDR2	0.0176481	0.00267191	0.00267191	0.00903184
1519	GPA33	0.0293447	0.0056855	0.0056855	0.0175084
1520	LINC01363	-0.000161219	0.960259	0.960259	0.977186
1521	AL451050.2	-0.0463985	0.00167272	0.00167272	0.00594533
1522	POU2F1	-0.0704243	0.0108324	0.0108324	0.0304654
1523	CD247	0.0835565	5.12896e-33	1e-30	9.53076e-32
1524	AL359962.2	-0.0069108	0.0053858	0.0053858	0.016728
1525	CREG1	0.327067	3.22539e-19	3.22539e-19	4.23577e-18
1526	AL031733.2	0.000560905	0.951746	0.951746	0.971903
1527	RCSD1	0.023003	0.445073	0.445073	0.585415
1528	MPZL1	0.138558	0.000247248	0.000247248	0.00106324
1529	ADCY10	0.00278481	0.50642	0.50642	0.64006
1530	Z99943.1	-0.00465918	0.673472	0.673472	0.775325
1531	MPC2	0.183364	9.93721e-10	9.93721e-10	8.17837e-09
1532	DCAF6	-0.010658	0.738633	0.738633	0.82452
1533	GPR161	-0.0225515	0.2175	0.2175	0.34923
1534	TIPRL	0.133421	8.57759e-05	8.57759e-05	0.000400886
1535	SFT2D2	0.039099	0.229122	0.229122	0.363335
1536	TBX19	-0.0427584	0.0104043	0.0104043	0.0294881
1537	XCL2	-0.000850035	0.838556	0.838556	0.897668
1538	XCL1	0.00192063	0.766735	0.766735	0.845082
1539	ATP1B1	-0.00798451	0.765993	0.765993	0.844522
1540	NME7	-0.00356483	0.832617	0.832617	0.893573
1541	BLZF1	0.0311359	0.295512	0.295512	0.439011
1542	CCDC181	0.00636181	0.394056	0.394056	0.536354
1543	SLC19A2	-0.131812	1.3192e-05	1.3192e-05	6.9947e-05
1544	AL021068.1	0.0178849	0.279108	0.279108	0.420544
1545	F5	-0.0961919	4.70824e-07	4.70824e-07	3.00807e-06
1546	SELP	0.0151746	2.34388e-191	1e-30	2.77777e-188
1547	C1orf112	0.0395743	0.0171118	0.0171118	0.0448741
1548	SELL	0.0158245	0.423877	0.423877	0.565901
1549	METTL18	0.031713	0.065611	0.065611	0.137443
1550	SCYL3	-0.0137635	0.466724	0.466724	0.604734
1551	KIFAP3	0.0893777	0.00096487	0.00096487	0.0036363
1552	AL354732.1	-0.0226616	0.0129688	0.0129688	0.0355439
1553	GORAB	0.0300359	0.298914	0.298914	0.442364
1554	MROH9	-0.00151653	0.114234	0.114234	0.213456
1555	FMO3	-0.00377047	1.73785e-70	1e-30	4.85969e-69
1556	FMO2	0.00372308	0.0376297	0.0376297	0.0872824
1557	AL021026.1	0.00407301	4.41064e-187	1e-30	6.56891e-185
1558	FMO1	0.000566109	0.000854304	0.000854304	0.00326676
1559	FMO4	-0.0314593	0.0259796	0.0259796	0.064013
1560	PRRC2C	-0.222092	1.10409e-16	1.10409e-16	1.319e-15
1561	MYOCOS	-0.00134533	0.677828	0.677828	0.778761
1562	VAMP4	0.0686431	0.0441389	0.0441389	0.0998601
1563	METTL13	0.0261895	0.337057	0.337057	0.480248
1564	DNM3	0.00538612	0.652846	0.652846	0.759658
1565	PIGC	0.0813586	0.00629333	0.00629333	0.0190937
1566	SUCO	-0.0545129	0.0359819	0.0359819	0.0840893
1567	FASLG	0.0166106	1.55923e-10	1.55923e-10	1.36067e-09
1568	TNFSF18	0.00757462	0.554034	0.554034	0.681718
1569	TNFSF4	0.00521954	0.533532	0.533532	0.663973
1570	AL645568.1	-0.0124506	0.19809	0.19809	0.325191
1571	PRDX6	0.0182963	0.580586	0.580586	0.702801
1572	ANKRD45	-0.00619193	1.80446e-15	1.80446e-15	2.03024e-14
1573	KLHL20	0.0275159	0.296638	0.296638	0.440219
1574	CENPL	0.0294744	0.122001	0.122001	0.224608
1575	DARS2	-0.0246231	0.279687	0.279687	0.421014
1576	GAS5-AS1	0.0273413	0.000102179	0.000102179	0.000471305
1577	ZBTB37	-0.0413245	0.0223787	0.0223787	0.0563419
1578	RC3H1	0.117824	0.000142601	0.000142601	0.000641704
1579	AL121983.1	-0.0189343	0.293961	0.293961	0.437287
1580	AL121983.2	0.00913472	0.36553	0.36553	0.508711
1581	RABGAP1L	-0.0377254	0.0523701	0.0523701	0.114788
1582	GPR52	-0.0141099	1.39215e-07	1.39215e-07	9.48192e-07
1583	Z99127.1	0.000178424	0.956322	0.956322	0.974695
1584	CACYBP	0.193104	4.88735e-09	4.88735e-09	3.77942e-08
1585	MRPS14	0.230351	1.43983e-09	1.43983e-09	1.17061e-08
1586	KIAA0040	0.0325069	0.183758	0.183758	0.307196
1587	TNR	-0.00729144	8.51796e-131	1e-30	3.80582e-129
1588	AL513329.1	-0.021373	0.000638459	0.000638459	0.00251555
1589	COP1	-0.0241353	0.436262	0.436262	0.577148
1590	AL590723.1	0.00739849	0.155688	0.155688	0.270995
1591	AL359265.3	-0.0160469	0.181917	0.181917	0.304827
1592	SEC16B	-0.00154609	0.558157	0.558157	0.685038
1593	RASAL2-AS1	0.0102514	0.449359	0.449359	0.589163
1594	RASAL2	0.00667469	0.843516	0.843516	0.901346
1595	CLEC20A	-0.000757749	0.774042	0.774042	0.850171
1596	C1orf220	0.0040725	0.298874	0.298874	0.442364
1597	AL137796.1	-0.00292846	0.483354	0.483354	0.619317
1598	AL449106.1	0.00163903	4.07422e-17	4.07422e-17	4.94663e-16
1599	RALGPS2	-0.0461786	0.0136106	0.0136106	0.0370353
1600	FAM20B	-0.0456256	0.0869862	0.0869862	0.17206
1601	TOR3A	0.0223891	0.439658	0.439658	0.580563
1602	ABL2	-0.49209	4.17576e-55	1e-30	1.02014e-53
1603	SOAT1	-0.0436471	0.208716	0.208716	0.338259
1604	AXDND1	-0.0431261	6.27914e-05	6.27914e-05	0.00030002
1605	TOR1AIP2	0.0323254	0.257874	0.257874	0.396272
1606	AL353708.3	-0.0442588	0.0427291	0.0427291	0.0970966
1607	TOR1AIP1	-0.0365475	0.153274	0.153274	0.26758
1608	AL353708.1	0.0164334	0.156532	0.156532	0.27197
1609	CEP350	0.0168045	0.591075	0.591075	0.711157
1610	QSOX1	-0.279286	2.58283e-23	2.58283e-23	3.85813e-22
1611	LHX4	-0.00761962	0.123262	0.123262	0.226329
1612	ACBD6	0.0201986	0.512816	0.512816	0.64571
1613	XPR1	-0.0683561	0.00331227	0.00331227	0.0108765
1614	KIAA1614	0.0138612	0.00984347	0.00984347	0.0280847
1615	AL162431.2	-0.0147853	0.204217	0.204217	0.33263
1616	KIAA1614-AS1	-0.0178398	0.00385129	0.00385129	0.0124592
1617	STX6	-0.00865921	0.780165	0.780165	0.854864
1618	MR1	0.0161023	0.607943	0.607943	0.724516
1619	IER5	-0.298453	3.22134e-28	3.22134e-28	5.4154e-27
1620	LINC01732	0.0102487	0.0509513	0.0509513	0.11218
1621	CACNA1E	-0.0266768	1.45767e-20	1.45767e-20	1.99238e-19
1622	LINC01344	-0.010901	5.04808e-05	5.04808e-05	0.000245434
1623	GLUL	-0.170331	9.16698e-09	9.16698e-09	6.96302e-08
1624	RNASEL	0.0794102	0.00553305	0.00553305	0.0171097
1625	RGS16	-0.0586043	0.00780333	0.00780333	0.0229946
1626	LINC01686	0.00648878	0.64987	0.64987	0.757401
1627	NPL	0.0588735	0.0850735	0.0850735	0.169005
1628	DHX9	-0.0964893	0.00087914	0.00087914	0.0033509
1629	LAMC1	0.091158	0.00213066	0.00213066	0.00738479
1630	LAMC2	-0.00930024	0.243175	0.243175	0.379573
1631	NMNAT2	-0.0102081	0.00629036	0.00629036	0.0190875
1632	SMG7	-0.0716022	0.0051002	0.0051002	0.0159679
1633	NCF2	-0.215488	3.87441e-16	3.87441e-16	4.50543e-15
1634	ARPC5	0.0540761	0.0798956	0.0798956	0.160752
1635	RGL1	0.0442936	0.213396	0.213396	0.34418
1636	APOBEC4	-0.00966159	1.1499e-161	1e-30	7.20244e-160
1637	COLGALT2	0.0264636	0.167232	0.167232	0.286133
1638	TSEN15	0.113172	0.000146731	0.000146731	0.000658667
1639	AL445228.2	0.00726711	0.214831	0.214831	0.345662
1640	C1orf21	-0.0266664	0.401624	0.401624	0.543891
1641	EDEM3	0.0224722	0.463912	0.463912	0.601807
1642	FAM129A	-0.201717	4.42844e-23	4.42844e-23	6.54815e-22
1643	RNF2	-0.0267326	0.391865	0.391865	0.534485
1644	TRMT1L	0.00741042	0.793656	0.793656	0.864938
1645	SWT1	0.00628458	0.813815	0.813815	0.879606
1646	IVNS1ABP	-0.341573	1.50556e-56	1e-30	3.73254e-55
1647	AL078644.2	-0.0355672	0.00488741	0.00488741	0.0153757
1648	HMCN1	-0.000455735	0.967254	0.967254	0.981113
1649	TPR	-0.00137037	0.960711	0.960711	0.977484
1650	ODR4	0.0897395	0.0066457	0.0066457	0.0200224
1651	OCLM	0.0171592	2.94754e-07	2.94754e-07	1.93607e-06
1652	PTGS2	-0.0966072	0.00167277	0.00167277	0.00594533
1653	PACERR	-0.0567307	0.0153321	0.0153321	0.0409548
1654	PLA2G4A	-0.0178439	0.459588	0.459588	0.597889
1655	ERVMER61-1	0.0201153	3.32175e-13	3.32175e-13	3.38334e-12
1656	RGS18	-0.0672859	0.0027838	0.0027838	0.00936127
1657	AL390957.1	-0.00951838	0.106543	0.106543	0.201707
1658	AL136987.1	-0.0573909	0.000384219	0.000384219	0.00158366
1659	RGS1	-0.0737412	0.0178718	0.0178718	0.0466359
1660	RGS13	-0.00522553	0.56152	0.56152	0.687767
1661	AL136454.1	-0.140339	1.00158e-07	1.00158e-07	6.91069e-07
1662	RGS2	-0.132522	8.59901e-07	8.59901e-07	5.32138e-06
1663	UCHL5	0.048412	0.0926419	0.0926419	0.180903
1664	TROVE2	0.0217903	0.472278	0.472278	0.609789
1665	GLRX2	0.0448544	0.197375	0.197375	0.324455
1666	CDC73	0.00948063	0.754375	0.754375	0.835812
1667	B3GALT2	-0.0130031	0.00707549	0.00707549	0.0211444
1668	LINC01031	0.0158888	5.15052e-16	5.15052e-16	5.96867e-15
1669	CFH	0.00170485	0.891499	0.891499	0.933908
1670	ASPM	0.0486437	1.5594e-06	1.5594e-06	9.32858e-06
1671	ZBTB41	0.0229175	0.334269	0.334269	0.477425
1672	DENND1B	-0.0611534	0.0412105	0.0412105	0.0942638
1673	C1orf53	-0.0177235	0.345309	0.345309	0.488688
1674	NEK7	0.0281346	0.34428	0.34428	0.487792
1675	ATP6V1G3	0.000876211	1.32986e-52	1e-30	3.15307e-51
1676	PTPRC	-0.207358	1.26383e-16	1.26383e-16	1.5018e-15
1677	AL157402.2	-0.0249735	0.0774797	0.0774797	0.157084
1678	MIR181A1HG	-0.0422454	0.208249	0.208249	0.337699
1679	NR5A2	9.95108e-05	0.975515	0.975515	0.985365
1680	LINC00862	-0.0061738	0.237289	0.237289	0.372788
1681	AC104461.1	-0.00612169	0.0203882	0.0203882	0.0521505
1682	ZNF281	-0.064469	0.0121129	0.0121129	0.0334766
1683	AL359834.1	-0.0014729	0.430565	0.430565	0.571907
1684	KIF14	0.020693	0.0933513	0.0933513	0.182049
1685	DDX59	0.0929888	0.00385658	0.00385658	0.0124709
1686	AL445483.1	0.014176	0.0107686	0.0107686	0.0303239
1687	CAMSAP2	-0.0373377	0.244492	0.244492	0.38086
1688	GPR25	0.0404507	6.45842e-36	1e-30	1.25341e-34
1689	INAVA	-0.0090555	0.00383286	0.00383286	0.0124096
1690	KIF21B	-0.0409933	0.0462845	0.0462845	0.103675
1691	AL358473.1	0.00951294	0.122159	0.122159	0.224838
1692	ASCL5	0.00460837	0.40507	0.40507	0.547077
1693	TMEM9	0.0453658	0.0883548	0.0883548	0.174202
1694	IGFN1	0.00482105	0.671946	0.671946	0.774354
1695	PKP1	-0.00560829	0.00321091	0.00321091	0.0105921
1696	TNNT2	0.00449294	0.545807	0.545807	0.674534
1697	LAD1	0.0205241	0.404411	0.404411	0.546371
1698	AC119427.1	0.00330381	0.74414	0.74414	0.82858
1699	TNNI1	0.00944879	0.333468	0.333468	0.476651
1700	PHLDA3	0.0427516	0.0183402	0.0183402	0.0476896
1701	CSRP1	0.0534012	0.102645	0.102645	0.195842
1702	AC096677.1	-0.00433075	0.688884	0.688884	0.786942
1703	NAV1	-0.0367438	0.261453	0.261453	0.400467
1704	IPO9-AS1	-0.0165265	0.235695	0.235695	0.370946
1705	IPO9	0.00579809	0.84862	0.84862	0.904828
1706	SHISA4	-0.000564189	0.974542	0.974542	0.984875
1707	TIMM17A	0.0588144	0.0846304	0.0846304	0.168324
1708	RNPEP	0.174387	1.512e-06	1.512e-06	9.05849e-06
1709	AC099676.1	-0.00669307	0.0382975	0.0382975	0.0885272
1710	ELF3-AS1	-0.0089401	1.14456e-120	1e-30	4.77439e-119
1711	ELF3	-0.0417931	3.04026e-15	3.04026e-15	3.40164e-14
1712	GPR37L1	-0.00608237	0.021325	0.021325	0.0541092
1713	ARL8A	-0.11205	0.000138703	0.000138703	0.000625142
1714	PTPN7	-0.0237446	0.339403	0.339403	0.482845
1715	UBE2T	0.071757	1.37648e-08	1.37648e-08	1.03074e-07
1716	PPP1R12B	-0.0678492	0.000360144	0.000360144	0.00149578
1717	SYT2	0.0300916	4.16847e-44	1e-30	9.00228e-43
1718	AC104463.2	-0.00026592	0.919798	0.919798	0.951457
1719	KDM5B	-0.0264211	0.306298	0.306298	0.450091
1720	AC098934.4	0.000227673	0.978025	0.978025	0.986909
1721	PCAT6	-0.0219597	0.129127	0.129127	0.234338
1722	RABIF	0.00661065	0.834398	0.834398	0.894789
1723	KLHL12	0.00302612	0.922454	0.922454	0.952978
1724	ADIPOR1	0.0902966	0.00384077	0.00384077	0.0124312
1725	CYB5R1	-0.0468253	0.0956719	0.0956719	0.18562
1726	TMEM183A	0.107363	0.000963746	0.000963746	0.00363343
1727	PPFIA4	0.0309798	8.61204e-05	8.61204e-05	0.000402309
1728	MYBPH	-0.00557121	0.637658	0.637658	0.748176
1729	CHI3L1	0.529244	1.24212e-33	1e-30	2.34277e-32
1730	CHIT1	0.454762	1.81589e-22	1.81589e-22	2.63612e-21
1731	LINC01353	-0.0520946	0.00119756	0.00119756	0.0044099
1732	LINC01136	-0.0890344	2.64532e-07	2.64532e-07	1.74669e-06
1733	BTG2	-0.243522	1.50872e-28	1.50872e-28	2.55125e-27
1734	ATP2B4	0.0231193	0.266469	0.266469	0.406219
1735	LAX1	0.00048727	0.948985	0.948985	0.97002
1736	ZC3H11A	-0.0590985	0.0063039	0.0063039	0.01912
1737	ZBED6	-0.0719226	0.000187909	0.000187909	0.000825274
1738	SNRPE	0.0639054	0.0506272	0.0506272	0.111603
1739	LINC00303	0.00179861	0.71759	0.71759	0.809099
1740	SOX13	-0.00239194	0.872913	0.872913	0.921447
1741	ETNK2	-0.0122411	0.163972	0.163972	0.281803
1742	KISS1	0.0102753	0.0165192	0.0165192	0.0435531
1743	GOLT1A	-0.00760266	1.12422e-28	1.12422e-28	1.90909e-27
1744	PLEKHA6	0.00993435	0.409302	0.409302	0.551385
1745	LINC00628	-0.0249102	0.00674417	0.00674417	0.0202809
1746	PPP1R15B	-0.28768	1.64959e-26	1.64959e-26	2.65121e-25
1747	PIK3C2B	-0.00519242	0.595688	0.595688	0.714796
1748	MDM4	-0.121853	1.04936e-07	1.04936e-07	7.23041e-07
1749	AL512306.3	-0.00855647	0.163462	0.163462	0.281167
1750	AL512306.2	-0.00988592	0.227502	0.227502	0.361451
1751	NFASC	0.00198479	0.68346	0.68346	0.783044
1752	CNTN2	-0.00481385	0.06803	0.06803	0.14142
1753	TMEM81	-0.00385396	0.689317	0.689317	0.787153
1754	RBBP5	-0.00790963	0.758871	0.758871	0.838528
1755	DSTYK	-0.000365288	0.989208	0.989208	0.994152
1756	TMCC2	-0.00362775	0.607213	0.607213	0.723946
1757	NUAK2	-0.0293543	0.161805	0.161805	0.279057
1758	LEMD1	0		1
1759	CDK18	0.0220195	0.332262	0.332262	0.475478
1760	MFSD4A	0.00320992	0.227631	0.227631	0.361626
1761	ELK4	-0.0379106	0.16015	0.16015	0.276796
1762	SLC45A3	-0.00877401	0.576914	0.576914	0.69999
1763	NUCKS1	0.0080342	0.790925	0.790925	0.863038
1764	RAB29	0.0388734	0.21236	0.21236	0.342949
1765	SLC41A1	0.0261464	0.205229	0.205229	0.333873
1766	PM20D1	0.00666351	2.18088e-182	1e-30	2.26025e-180
1767	SLC26A9	0.0141856	1.7502e-05	1.7502e-05	9.10464e-05
1768	RAB7B	-0.0672006	0.0758632	0.0758632	0.154712
1769	CTSE	-0.00620913	0.0546729	0.0546729	0.118877
1770	RHEX	0.00356206	7.48728e-190	1e-30	1.83584e-187
1771	FAM72A	-0.0290816	0.304498	0.304498	0.44822
1772	SRGAP2	-0.0114329	0.727907	0.727907	0.816764
1773	IKBKE	-0.00871703	0.764317	0.764317	0.843017
1774	C1orf147	-0.000506767	0.918557	0.918557	0.950613
1775	AC244034.2	0.00682614	0.499801	0.499801	0.634287
1776	RASSF5	-0.141564	4.88404e-10	4.88404e-10	4.11561e-09
1777	EIF2D	0.0807475	0.00328713	0.00328713	0.010808
1778	AL591846.2	-0.0838724	2.11047e-05	2.11047e-05	0.000108525
1779	DYRK3	-0.0998894	0.000590681	0.000590681	0.00234569
1780	MAPKAPK2	-0.236788	1.2071e-17	1.2071e-17	1.49446e-16
1781	IL10	-0.107063	0.00203018	0.00203018	0.0070731
1782	IL19	0.00353751	0.758126	0.758126	0.837889
1783	IL20	0.00235243	0.706166	0.706166	0.799717
1784	IL24	0.042821	0.0590292	0.0590292	0.126166
1785	FCMR	0.112149	1.21092e-05	1.21092e-05	6.45803e-05
1786	PIGR	-0.0351518	1.09531e-11	1.09531e-11	1.02716e-10
1787	FCAMR	0.0154994	0.100138	0.100138	0.192177
1788	C1orf116	-0.0019502	0.320501	0.320501	0.464432
1789	PFKFB2	-0.0298385	0.0798725	0.0798725	0.160752
1790	YOD1	-0.059103	0.00324372	0.00324372	0.0106828
1791	C4BPB	-0.000331773	0.952257	0.952257	0.972277
1792	C4BPA	0.00225002	6.0007e-29	6.0007e-29	1.02333e-27
1793	CD55	-0.0794794	0.00283448	0.00283448	0.00950627
1794	CR2	0.00414601	0.118263	0.118263	0.219084
1795	CR1	-0.170014	4.85867e-18	4.85867e-18	6.0865e-17
1796	AL137789.1	-0.000883808	0.7848	0.7848	0.858402
1797	CR1L	0.0229736	0.294865	0.294865	0.438275
1798	CD46	0.128071	1.97969e-05	1.97969e-05	0.000102218
1799	MIR29B2CHG	-0.0838532	6.64576e-05	6.64576e-05	0.000316259
1800	PLXNA2	-0.0349449	0.052469	0.052469	0.114943
1801	CAMK1G	-0.0901117	4.69054e-06	4.69054e-06	2.6491e-05
1802	LAMB3	-0.0444856	0.0465091	0.0465091	0.104086
1803	AL031316.1	-0.0597999	0.00076342	0.00076342	0.00295066
1804	G0S2	-0.442689	3.13887e-65	1e-30	8.42591e-64
1805	HSD11B1	-0.0181208	0.493411	0.493411	0.628319
1806	TRAF3IP3	-0.00630516	0.67983	0.67983	0.780317
1807	C1orf74	-0.0189847	0.0822475	0.0822475	0.164642
1808	IRF6	-0.00803042	0.107659	0.107659	0.203419
1809	UTP25	0.0479794	0.0648677	0.0648677	0.136086
1810	SERTAD4-AS1	-0.0020847	2.35529e-36	1e-30	4.61104e-35
1811	SERTAD4	0.00202597	2.2306e-29	2.2306e-29	3.82666e-28
1812	HHAT	-0.00624051	0.49581	0.49581	0.630605
1813	RCOR3	-0.0400191	0.143706	0.143706	0.25468
1814	TRAF5	0.0325602	0.229387	0.229387	0.363583
1815	LINC00467	-0.0105828	0.69806	0.69806	0.793368
1816	SLC30A1	0.00826158	0.78282	0.78282	0.856844
1817	NEK2	0.0118477	3.98702e-06	3.98702e-06	2.27219e-05
1818	AC096637.2	0.00683327	6.30415e-139	1e-30	3.06162e-137
1819	LPGAT1	0.0322866	0.285254	0.285254	0.427276
1820	INTS7	0.0236189	0.211265	0.211265	0.34162
1821	DTL	0.0362153	0.00161907	0.00161907	0.0057718
1822	AL451060.1	0.0210232	0.00268554	0.00268554	0.00906723
1823	PPP2R5A	-0.0264068	0.376507	0.376507	0.51928
1824	AL360091.3	-0.00383706	0.0400265	0.0400265	0.0919846
1825	TMEM206	0.0609412	0.083987	0.083987	0.167406
1826	NENF	0.283753	3.69438e-14	3.69438e-14	3.93427e-13
1827	LINC01740	-0.00112367	0.883425	0.883425	0.928109
1828	AC092803.2	-0.140132	4.77621e-06	4.77621e-06	2.69081e-05
1829	ATF3	-0.096119	0.0022889	0.0022889	0.00786005
1830	FAM71A	-0.0419686	0.0322261	0.0322261	0.07687
1831	AL590648.3	-0.00791943	0.410321	0.410321	0.552314
1832	BATF3	0.0453398	0.14075	0.14075	0.250813
1833	NSL1	-0.0177312	0.529496	0.529496	0.659933
1834	TATDN3	0.106591	0.0014091	0.0014091	0.00510109
1835	FLVCR1-DT	0.00976812	0.574069	0.574069	0.697711
1836	FLVCR1	-0.0228894	0.256518	0.256518	0.39473
1837	VASH2	-0.000649337	0.906608	0.906608	0.943089
1838	ANGEL2	0.0186225	0.520501	0.520501	0.652077
1839	RPS6KC1	-0.048452	0.105807	0.105807	0.200637
1840	PROX1	0.0193804	0.000981365	0.000981365	0.00369155
1841	SMYD2	0.0673698	0.00516399	0.00516399	0.0161297
1842	PTPN14	-0.000632394	0.940556	0.940556	0.964732
1843	CENPF	0.0683999	1.12632e-10	1.12632e-10	9.91933e-10
1844	KCTD3	-0.0137631	0.406922	0.406922	0.548915
1845	ESRRG	0.00131868	5.97393e-110	1e-30	2.2835e-108
1846	GPATCH2	0.00301487	0.913124	0.913124	0.946794
1847	SPATA17	-0.00852598	2.64453e-77	1e-30	7.86553e-76
1848	RRP15	0.145795	2.42562e-05	2.42562e-05	0.00012353
1849	TGFB2-AS1	0.00905321	0.102148	0.102148	0.195135
1850	TGFB2	0.00708553	0.522742	0.522742	0.653989
1851	C1orf143	-0.010652	0.0107207	0.0107207	0.0302223
1852	LYPLAL1	0.114246	0.000529638	0.000529638	0.00212978
1853	AC096642.1	-0.00662256	9.66791e-191	1e-30	4.18609e-188
1854	ZC3H11B	-0.00448261	0.799698	0.799698	0.869201
1855	EPRS	0.146862	1.41921e-06	1.41921e-06	8.54329e-06
1856	BPNT1	0.086975	0.00140638	0.00140638	0.00509308
1857	IARS2	0.20239	1.1401e-08	1.1401e-08	8.59821e-08
1858	RAB3GAP2	0.00808258	0.784474	0.784474	0.858188
1859	MARK1	-0.00261732	0.00157335	0.00157335	0.00562907
1860	C1orf115	-0.00224468	0.84638	0.84638	0.903303
1861	2021-03-02	-0.00946676	0.0385764	0.0385764	0.0890559
1862	2021-03-01	0.0245247	0.147033	0.147033	0.259183
1863	HLX-AS1	0.013708	0.461526	0.461526	0.599683
1864	HLX	0.0921154	0.0155492	0.0155492	0.0414303
1865	DUSP10	-0.210262	2.19638e-14	2.19638e-14	2.35396e-13
1866	LINC01655	0.00421735	0.315107	0.315107	0.459164
1867	LINC02257	0.0100792	0.0594632	0.0594632	0.126931
1868	LINC01705	-0.20566	2.80294e-11	2.80294e-11	2.56864e-10
1869	AL513314.2	-0.0199888	0.00359706	0.00359706	0.0117216
1870	TAF1A	0.0222283	0.3801	0.3801	0.523158
1871	TAF1A-AS1	0.0101229	0.33502	0.33502	0.478165
1872	MIA3	0.0507473	0.0906995	0.0906995	0.177843
1873	AL592148.3	0.00191879	0.880805	0.880805	0.926566
1874	AIDA	0.0350669	0.280963	0.280963	0.422422
1875	BROX	0.00614655	0.842196	0.842196	0.900379
1876	FAM177B	0.00275243	0.571959	0.571959	0.696399
1877	AL392172.1	0.0187137	0.61384	0.61384	0.729123
1878	DISP1	-0.00970123	0.547154	0.547154	0.675327
1879	TLR5	-0.0384691	0.155921	0.155921	0.271307
1880	SUSD4	-0.00142676	0.448805	0.448805	0.588782
1881	CAPN8	0.00133201	0.70218	0.70218	0.796414
1882	CAPN2	-0.0360876	0.223809	0.223809	0.356852
1883	TP53BP2	-0.0542523	0.0837023	0.0837023	0.166956
1884	FBXO28	0.0370605	0.240516	0.240516	0.376475
1885	DEGS1	0.0498765	0.132163	0.132163	0.238711
1886	NVL	0.0314739	0.164462	0.164462	0.282438
1887	CNIH4	0.415078	2.81471e-27	2.81471e-27	4.63873e-26
1888	WDR26	-0.089267	0.00132695	0.00132695	0.00484555
1889	CNIH3	0.00350199	0.825803	0.825803	0.888673
1890	DNAH14	0.0199841	0.127058	0.127058	0.231548
1891	LBR	-0.0024572	0.92464	0.92464	0.954501
1892	ENAH	-0.00785769	0.0635915	0.0635915	0.133966
1893	SRP9	-0.0285732	0.34098	0.34098	0.484505
1894	EPHX1	0.143928	2.17805e-08	2.17805e-08	1.59824e-07
1895	AL591895.1	0.0222181	0.228356	0.228356	0.36235
1896	TMEM63A	-0.0533196	0.0623693	0.0623693	0.131962
1897	PYCR2	0.0132356	0.654542	0.654542	0.761102
1898	SDE2	-0.0583283	0.019376	0.019376	0.0499518
1899	AL512343.2	-0.00333464	0.63058	0.63058	0.742471
1900	H3F3A	-0.231319	5.00677e-15	5.00677e-15	5.53415e-14
1901	LINC01703	0.00381172	0.771036	0.771036	0.847685
1902	ACBD3	-0.0892541	0.00385915	0.00385915	0.0124766
1903	ACBD3-AS1	0.0095793	0.297581	0.297581	0.441073
1904	LIN9	0.0357536	0.00137637	0.00137637	0.0049979
1905	PARP1	0.111535	1.61059e-05	1.61059e-05	8.43517e-05
1906	STUM	-0.00803894	0.0130249	0.0130249	0.0356752
1907	ITPKB	-0.0316126	0.200915	0.200915	0.328529
1908	PSEN2	-0.000130466	0.995978	0.995978	0.997878
1909	COQ8A	0.0515008	0.0187338	0.0187338	0.0485515
1910	CDC42BPA	-0.0317139	0.0940651	0.0940651	0.183192
1911	ZNF678	0.0123764	0.453937	0.453937	0.592922
1912	SNAP47	0.000618514	0.974588	0.974588	0.984875
1913	JMJD4	0.0487925	0.0454206	0.0454206	0.102196
1914	WNT9A	-0.00240169	1.65413e-83	1e-30	5.15625e-82
1915	ARF1	0.0737619	0.021448	0.021448	0.0543458
1916	C1orf35	0.0245083	0.369318	0.369318	0.512366
1917	MRPL55	0.101974	0.00179101	0.00179101	0.006322
1918	GUK1	0.256666	6.45861e-15	6.45861e-15	7.08053e-14
1919	GJC2	-0.00853525	0.0620842	0.0620842	0.131549
1920	IBA57-DT	0.00786635	0.155574	0.155574	0.270843
1921	IBA57	-0.0459259	0.034569	0.034569	0.0813299
1922	OBSCN-AS1	0.00251768	0.342641	0.342641	0.486246
1923	OBSCN	0.00519212	0.592484	0.592484	0.712086
1924	AL353593.1	0.0127097	2.52541e-06	2.52541e-06	1.46964e-05
1925	AL353593.2	0.0127634	0.000106313	0.000106313	0.000488689
1926	TRIM11	-0.0416723	0.132068	0.132068	0.238599
1927	AL670729.1	0.0248673	3.46941e-33	1e-30	6.48893e-32
1928	TRIM17	-0.00427786	0.187709	0.187709	0.311984
1929	HIST3H2A	-0.121699	1.31264e-05	1.31264e-05	6.96542e-05
1930	HIST3H2BB	-0.0053484	0.6651	0.6651	0.769552
1931	RNF187	0.01168	0.693008	0.693008	0.789933
1932	RHOU	0.0432502	0.234527	0.234527	0.369458
1933	RAB4A	0.0509425	0.0975978	0.0975978	0.188465
1934	AL117350.1	0.0128468	0.0374261	0.0374261	0.0869065
1935	CCSAP	0.00487896	0.856644	0.856644	0.910728
1936	ACTA1	0.00307235	0.3446	0.3446	0.488027
1937	NUP133	-0.0318463	0.187064	0.187064	0.311246
1938	AL121990.1	-0.00753386	0.514385	0.514385	0.646955
1939	ABCB10	-0.00409971	0.848771	0.848771	0.904867
1940	TAF5L	-0.0256378	0.305901	0.305901	0.449825
1941	URB2	-0.00148794	0.927969	0.927969	0.956465
1942	LINC01736	0.0173247	0.0228845	0.0228845	0.0574356
1943	GALNT2	0.0435279	0.122741	0.122741	0.225606
1944	AL136988.1	0.0247157	1.38074e-18	1.38074e-18	1.7671e-17
1945	PGBD5	0.00337636	0.615952	0.615952	0.730683
1946	COG2	0.00620449	0.828246	0.828246	0.890425
1947	AGT	-0.00134437	5.15452e-186	1e-30	7.00249e-184
1948	CAPN9	-0.000100492	0.0258544	0.0258544	0.0637669
1949	C1orf198	-0.00451087	0.828904	0.828904	0.891002
1950	TTC13	0.0029675	0.871997	0.871997	0.920721
1951	ARV1	0.0618258	0.0148646	0.0148646	0.0399207
1952	FAM89A	0.000205158	0.994429	0.994429	0.997157
1953	C1orf131	0.105129	0.00140011	0.00140011	0.00507402
1954	GNPAT	0.0290007	0.314165	0.314165	0.458223
1955	EXOC8	-0.0126766	0.619297	0.619297	0.733352
1956	SPRTN	0.000358568	0.989131	0.989131	0.994152
1957	EGLN1	-0.0144251	0.576538	0.576538	0.699866
1958	AL445524.1	0.0908207	0.00595331	0.00595331	0.0182354
1959	TSNAX	-0.00381803	0.903779	0.903779	0.941566
1960	TSNAX-DISC1	0.00245802	0.829916	0.829916	0.8916
1961	DISC1	-0.0233112	0.252027	0.252027	0.389339
1962	SIPA1L2	-0.07235	0.00847239	0.00847239	0.0246699
1963	MAP10	0.0326503	0.0848829	0.0848829	0.168759
1964	NTPCR	0.120742	0.000371659	0.000371659	0.00153725
1965	PCNX2	0.032635	0.0229115	0.0229115	0.0574745
1966	MAP3K21	-0.0277099	0.077012	0.077012	0.156402
1967	KCNK1	-0.00259563	1.035e-70	1e-30	2.91044e-69
1968	SLC35F3	0.0182962	6.6255e-66	1e-30	1.7929e-64
1969	AL355472.4	0.00506027	0.451203	0.451203	0.590541
1970	AL355472.1	-0.0176857	0.547319	0.547319	0.675448
1971	COA6	-0.0302581	0.322267	0.322267	0.465816
1972	TARBP1	0.0191705	0.321237	0.321237	0.464963
1973	LINC01354	-0.00136422	0.806618	0.806618	0.87409
1974	IRF2BP2	-0.0938012	0.000735024	0.000735024	0.00285463
1975	AL160408.2	-0.0143535	0.186644	0.186644	0.310754
1976	AL160408.4	0.0151079	0.00997914	0.00997914	0.0284355
1977	LINC01132	0.00700711	0.396746	0.396746	0.539107
1978	AL391832.1	0.00195311	0.860417	0.860417	0.913387
1979	AL391832.2	-0.0806726	4.30639e-05	4.30639e-05	0.000211542
1980	AL391832.3	-0.0415849	0.0778121	0.0778121	0.157568
1981	LINC01348	-0.0120568	6.07099e-06	6.07099e-06	3.37378e-05
1982	TOMM20	-0.0310719	0.312394	0.312394	0.456401
1983	RBM34	0.0753544	0.00600442	0.00600442	0.018364
1984	ARID4B	-0.102594	3.40679e-05	3.40679e-05	0.000170094
1985	GGPS1	-0.0268764	0.27125	0.27125	0.411532
1986	TBCE	-0.0118306	0.566835	0.566835	0.692014
1987	AL357556.4	0.00907949	0.101153	0.101153	0.193736
1988	TBCE-1	0.00903694	0.645234	0.645234	0.754117
1989	B3GALNT2	0.00910563	0.673852	0.673852	0.775491
1990	GNG4	0.00447293	0.814406	0.814406	0.879969
1991	LYST	-0.109299	9.19874e-06	9.19874e-06	5e-05
1992	AL139161.2	0.00407194	0.209806	0.209806	0.339725
1993	NID1	-0.00248034	0.928018	0.928018	0.956465
1994	GPR137B	-0.0220008	0.540695	0.540695	0.670352
1995	ERO1B	-0.0854261	0.0022067	0.0022067	0.0076129
1996	EDARADD	-0.00343122	0.68742	0.68742	0.786063
1997	LGALS8	-0.015194	0.615099	0.615099	0.730145
1998	LGALS8-AS1	-0.0116882	0.517055	0.517055	0.649339
[truncated: 18,111 more rows]

## Sheet: Neutro_VAP_vsNOVAP_EarlyTime
	gene	log2FC	pval	Pval_clean	qval
0	FAM138A	0.0277579	0.302392	0.302392	0.522193
1	AL627309.1	0.0151049	0.589615	0.589615	0.735901
2	AL627309.2	0.0173748	0.529442	0.529442	0.690156
3	AL669831.5	0.00521445	0.855293	0.855293	0.917321
4	FAM87B	-0.000128291	0.820956	0.820956	0.896207
5	LINC00115	0.01014	0.865873	0.865873	0.924178
6	FAM41C	0.0369265	0.345394	0.345394	0.557164
7	NOC2L	-0.0605669	0.0463542	0.0463542	0.177369
8	KLHL17	-0.0258513	0.0112942	0.0112942	0.0819012
9	PLEKHN1	-0.0161702	0.0192542	0.0192542	0.106324
10	AL645608.8	-0.084784	0.0620087	0.0620087	0.209996
11	HES4	0.890542	9.37461e-10	9.37461e-10	6.41108e-08
12	ISG15	0.120351	0.0489584	0.0489584	0.183
13	AL645608.2	0.0256933	0.339998	0.339998	0.552567
14	AGRN	0.0498837	0.331299	0.331299	0.545008
15	AL645608.9	-0.0114622	0.138602	0.138602	0.335792
16	RNF223	-0.00126134	0.133935	0.133935	0.329217
17	C1orf159	-0.0170473	0.0350597	0.0350597	0.150342
18	AL390719.2	-0.00440535	0.0214389	0.0214389	0.113226
19	TTLL10	-0.00276868	0.0164581	0.0164581	0.0984548
20	TNFRSF18	-0.0314872	0.00131303	0.00131303	0.0192559
21	TNFRSF4	-0.0294041	0.174537	0.174537	0.384575
22	SDF4	0.0857119	0.0928614	0.0928614	0.266991
23	B3GALT6	-0.0217398	0.463327	0.463327	0.640879
24	C1QTNF12	-0.0314626	0.00856503	0.00856503	0.0769177
25	AL162741.1	-0.000758374	0.119492	0.119492	0.307108
26	UBE2J2	0.165976	0.0182472	0.0182472	0.103346
27	SCNN1D	-0.010956	0.0861527	0.0861527	0.255522
28	ACAP3	0.00860741	0.848321	0.848321	0.913264
29	PUSL1	-0.0142577	0.398514	0.398514	0.596935
30	INTS11	0.0427867	0.319286	0.319286	0.535856
31	CPTP	-0.0382227	0.00176651	0.00176651	0.0242096
32	TAS1R3	0.00116462	0.01248	0.01248	0.086027
33	DVL1	0.00940494	0.743761	0.743761	0.844623
34	MXRA8	0.0233346	0.39193	0.39193	0.592937
35	AURKAIP1	0.280474	0.000131059	0.000131059	0.00291491
36	CCNL2	0.0763327	0.279659	0.279659	0.500786
37	MRPL20	-0.0127777	0.709761	0.709761	0.821794
38	AL391244.3	-0.00477948	0.280926	0.280926	0.501904
39	ANKRD65	-0.000764732	0.00898611	0.00898611	0.0769594
40	AL391244.2	0.0273877	0.308879	0.308879	0.527505
41	LINC01770	0.000602195	0.158471	0.158471	0.363166
42	VWA1	-0.000309311	0.153554	0.153554	0.357209
43	ATAD3C	0.00131703	0.00892361	0.00892361	0.0769594
44	ATAD3B	0.00210941	0.959521	0.959521	0.979311
45	ATAD3A	0.0665059	0.158242	0.158242	0.362949
46	SSU72	0.301359	0.000252555	0.000252555	0.00500776
47	AL645728.1	-0.000111943	0.998222	0.998222	0.998981
48	FNDC10	0.0191471	0.48945	0.48945	0.660334
49	AL691432.2	-0.0629889	2.69284e-05	2.69284e-05	0.000732642
50	MIB2	-0.0737537	1.80253e-05	1.80253e-05	0.000513339
51	MMP23B	-0.00758839	0.227505	0.227505	0.444875
52	CDK11B	-0.141159	0.0606196	0.0606196	0.207498
53	FO704657.1	0.0252403	0.524607	0.524607	0.686881
54	SLC35E2B	0.112261	0.119223	0.119223	0.30674
55	CDK11A	-0.293725	6.1347e-07	6.1347e-07	2.57504e-05
56	SLC35E2A	0.0413001	0.364248	0.364248	0.572751
57	NADK	-0.173189	0.0604977	0.0604977	0.207457
58	GNB1	-0.233383	0.00038127	0.00038127	0.00703286
59	AL109917.1	0.0012476	0.0983983	0.0983983	0.274883
60	TMEM52	-0.00249182	0.0254179	0.0254179	0.125104
61	CFAP74	-0.000927653	0.0122777	0.0122777	0.0853581
62	PRKCZ	0.0013323	0.963195	0.963195	0.980952
63	AL590822.2	-0.00278037	0.924612	0.924612	0.957828
64	PRKCZ-AS1	-0.0079919	0.200761	0.200761	0.414707
65	FAAP20	0.0453086	0.299461	0.299461	0.519633
66	SKI	-0.1745	0.00761934	0.00761934	0.0743302
67	MORN1	0.0164332	0.681804	0.681804	0.802362
68	RER1	0.217695	0.00100807	0.00100807	0.0153781
69	PEX10	0.032533	0.405659	0.405659	0.601134
70	PLCH2	-0.00150821	0.400441	0.400441	0.597955
71	PANK4	-0.0286133	0.591911	0.591911	0.737584
72	AL139246.5	-0.475738	3.42194e-07	3.42194e-07	1.49569e-05
73	TNFRSF14-AS1	-0.242287	0.00337509	0.00337509	0.0401062
74	TNFRSF14	-0.529935	1.19021e-11	1.19021e-11	1.0542e-09
75	AL139246.3	0.0277768	0.571245	0.571245	0.722128
76	FAM213B	-0.0374255	0.673519	0.673519	0.796293
77	MMEL1	-0.0227174	0.0216169	0.0216169	0.113853
78	TTC34	-0.0130522	0.0879979	0.0879979	0.258895
79	PRDM16	-0.00813555	0.0865171	0.0865171	0.256057
80	AL590438.1	-0.00371785	0.400175	0.400175	0.597955
81	ARHGEF16	-0.00241938	0.0173753	0.0173753	0.100909
82	MEGF6	-0.0257235	0.0174846	0.0174846	0.101108
83	AL513320.1	0.000870445	0.0848712	0.0848712	0.252923
84	TPRG1L	-0.0934781	0.189325	0.189325	0.402163
85	WRAP73	0.0480759	0.204247	0.204247	0.418361
86	TP73	0.000631461	0.0383908	0.0383908	0.158726
87	SMIM1	-0.00620722	0.289503	0.289503	0.510218
88	LRRC47	-0.0392288	0.11066	0.11066	0.294226
89	CEP104	0.0573413	0.259001	0.259001	0.479642
90	DFFB	-0.0139094	0.0279296	0.0279296	0.131911
91	C1orf174	0.0535142	0.261622	0.261622	0.48223
92	LINC01134	-0.00740811	0.23718	0.23718	0.455468
93	LINC01345	-0.00438947	0.02402	0.02402	0.121588
94	AL365255.1	-0.00504563	0.254784	0.254784	0.474719
95	NPHP4	0.0402032	0.406328	0.406328	0.60145
96	KCNAB2	-0.183634	0.0205863	0.0205863	0.110559
97	RPL22	0.14202	0.00111207	0.00111207	0.016686
98	AL031847.1	-0.000518399	0.128242	0.128242	0.321381
99	RNF207	-0.00694274	0.141156	0.141156	0.338874
100	ICMT	0.0171586	0.502262	0.502262	0.670639
101	LINC00337	-0.00145841	0.114226	0.114226	0.29986
102	GPR153	-0.012837	0.075448	0.075448	0.236692
103	ACOT7	-0.0025281	0.583712	0.583712	0.731313
104	AL031848.2	-0.00714116	0.131072	0.131072	0.325631
105	HES2	-0.00389941	0.3784	0.3784	0.58399
106	ESPN	-0.000190879	0.158134	0.158134	0.362939
107	TNFRSF25	0.0284213	0.294466	0.294466	0.51543
108	PLEKHG5	-0.000438223	0.300039	0.300039	0.520215
109	NOL9	-0.00508339	0.883208	0.883208	0.933581
110	ZBTB48	0.00316713	0.956644	0.956644	0.97755
111	KLHL21	-0.20889	0.00534263	0.00534263	0.0571073
112	PHF13	-0.0140551	0.789218	0.789218	0.875526
113	THAP3	-0.000285147	0.99346	0.99346	0.996384
114	DNAJC11	-0.0302979	0.288426	0.288426	0.509245
115	CAMTA1-DT	-0.00721309	0.114701	0.114701	0.300636
116	CAMTA1	0.11987	0.0252723	0.0252723	0.124846
117	VAMP3	0.135237	0.0570004	0.0570004	0.200197
118	PER3	-0.0150369	0.833986	0.833986	0.904186
119	Z98884.1	-0.00621747	0.260724	0.260724	0.481398
120	UTS2	0.0634815	0.260845	0.260845	0.481417
121	TNFRSF9	-0.187868	3.27147e-10	3.27147e-10	2.34915e-08
122	PARK7	0.115826	0.00839327	0.00839327	0.0769177
123	AL034417.4	-0.00451653	0.307323	0.307323	0.526317
124	AL034417.3	-0.00140241	0.0726407	0.0726407	0.230547
125	ERRFI1	-0.0158945	0.0138863	0.0138863	0.0898385
126	AL034417.2	-0.00371816	0.0214043	0.0214043	0.113132
127	SLC45A1	-0.00369875	0.405118	0.405118	0.600818
128	RERE	0.0950102	0.155042	0.155042	0.359044
129	AL096855.1	-0.0112264	0.0405591	0.0405591	0.164345
130	ENO1	0.176488	0.00254192	0.00254192	0.0321636
131	ENO1-AS1	0.00770993	0.785824	0.785824	0.873544
132	SLC2A5	-0.00350716	0.843404	0.843404	0.910225
133	GPR157	0.0474383	0.450092	0.450092	0.631643
134	MIR34AHG	0.00741625	0.853234	0.853234	0.916602
135	LINC01759	-4.41888e-05	0.938655	0.938655	0.966042
136	H6PD	0.0392384	0.496583	0.496583	0.665679
137	SPSB1	0.00400899	0.883631	0.883631	0.93379
138	SLC25A33	0.0492623	0.538857	0.538857	0.697824
139	TMEM201	-0.0275928	0.0141865	0.0141865	0.0908405
140	PIK3CD	0.0358217	0.633008	0.633008	0.765503
141	PIK3CD-AS1	-0.000594895	0.32541	0.32541	0.540534
142	PIK3CD-AS2	0.0294347	0.275052	0.275052	0.496294
143	CLSTN1	0.0144376	0.703924	0.703924	0.817962
144	CTNNBIP1	0.066025	0.127984	0.127984	0.321214
145	LZIC	-0.00349335	0.937444	0.937444	0.965441
146	NMNAT1	0.0719291	0.207683	0.207683	0.422078
147	RBP7	0.155793	0.0565762	0.0565762	0.199463
148	UBE4B	-0.0494264	0.333354	0.333354	0.547091
149	KIF1B	-0.0667907	0.303021	0.303021	0.522612
150	AL139424.3	-0.00443996	0.0231874	0.0231874	0.119079
151	AL139424.2	0.081278	0.136747	0.136747	0.332679
152	PGD	0.317028	1.69724e-05	1.69724e-05	0.000487497
153	AL139424.1	0.000966859	0.100261	0.100261	0.278043
154	CENPS-CORT	-0.000500869	0.983149	0.983149	0.990936
155	CENPS	0.0194972	0.479517	0.479517	0.653418
156	CORT	0.000639869	0.180058	0.180058	0.391081
157	DFFA	0.00124175	0.970913	0.970913	0.984924
158	PEX14	-0.0295348	0.00449775	0.00449775	0.0499528
159	CASZ1	-0.0639205	6.06562e-05	6.06562e-05	0.00150748
160	AL139423.1	-0.000197793	0.679656	0.679656	0.800443
161	C1orf127	-0.00661571	0.148537	0.148537	0.35041
162	TARDBP	0.0311558	0.599523	0.599523	0.743267
163	MASP2	2.09604e-05	0.974277	0.974277	0.986792
164	AL109811.3	0.0246059	0.457939	0.457939	0.637056
165	SRM	0.0301853	0.269457	0.269457	0.49069
166	EXOSC10	-0.0016021	0.963094	0.963094	0.980952
167	AL109811.1	-0.00241437	0.0284578	0.0284578	0.133371
168	AL109811.2	0.00151442	0.0111677	0.0111677	0.0814237
169	MTOR	-0.074461	1.8691e-06	1.8691e-06	6.99815e-05
170	UBIAD1	0.0930104	0.105569	0.105569	0.286485
171	DISP3	0.00119098	0.0569825	0.0569825	0.200191
172	FBXO2	-0.00030047	0.605631	0.605631	0.747273
173	FBXO44	-0.0112524	0.0621779	0.0621779	0.210321
174	FBXO6	0.173129	0.0231285	0.0231285	0.118931
175	MAD2L2	-0.0495274	0.18501	0.18501	0.39678
176	DRAXIN	-0.00986768	0.117645	0.117645	0.304455
177	AGTRAP	0.520461	1.27167e-07	1.27167e-07	5.95997e-06
178	C1orf167	-0.0223569	0.023526	0.023526	0.120085
179	MTHFR	-0.114322	0.100151	0.100151	0.277973
180	CLCN6	0.0396181	0.652735	0.652735	0.780162
181	NPPA-AS1	0.0159003	0.690422	0.690422	0.809631
182	NPPA	-0.00700949	0.129524	0.129524	0.323383
183	KIAA2013	-0.0138156	0.736172	0.736172	0.839419
184	PLOD1	-0.0401736	0.06264	0.06264	0.211068
185	MFN2	-0.0997779	0.10521	0.10521	0.28609
186	MIIP	0.00939167	0.861955	0.861955	0.922001
187	TNFRSF8	-0.372254	7.81255e-09	7.81255e-09	4.51377e-07
188	TNFRSF1B	-0.725304	2.95648e-22	2.95648e-22	7.92574e-20
189	VPS13D	-0.276113	0.000272988	0.000272988	0.00534439
190	DHRS3	-0.027203	0.044949	0.044949	0.174289
191	AC254633.1	-0.0166679	0.0330128	0.0330128	0.145274
192	C1orf158	-0.000211598	0.0601521	0.0601521	0.206834
193	PDPN	0.0210812	0.443764	0.443764	0.627049
194	PRDM2	-0.316851	5.01222e-06	5.01222e-06	0.000167194
195	KAZN	-0.0224963	0.464867	0.464867	0.641996
196	TMEM51-AS1	0.0279415	0.299561	0.299561	0.519714
197	TMEM51	-0.0300277	0.289692	0.289692	0.510299
198	FHAD1	0.00129778	0.959191	0.959191	0.979208
199	AL031283.2	0.000437361	0.137706	0.137706	0.334144
200	AL031283.1	-0.0516314	0.000753773	0.000753773	0.0122541
201	EFHD2	-0.419238	1.34052e-08	1.34052e-08	7.44546e-07
202	CTRC	-0.0601359	0.000123045	0.000123045	0.00275188
203	CELA2A	-0.0108688	0.0851083	0.0851083	0.253481
204	CELA2B	0.000926595	0.243879	0.243879	0.463074
205	CASP9	0.000993923	0.988432	0.988432	0.993573
206	DNAJC16	0.0286438	0.569883	0.569883	0.721359
207	AGMAT	-0.00698842	0.151846	0.151846	0.355236
208	AL121992.1	0.0133429	0.63376	0.63376	0.766137
209	DDI2	0.0434755	0.424455	0.424455	0.613374
210	AL121992.2	-0.0211256	0.0223222	0.0223222	0.116152
211	PLEKHM2	-0.0967266	0.184689	0.184689	0.396387
212	SLC25A34	-0.0255499	0.594564	0.594564	0.739701
213	FBLIM1	0.0172796	0.379567	0.379567	0.584452
214	UQCRHL	-0.0330888	0.00461283	0.00461283	0.050857
215	AL450998.2	-0.0767818	0.208233	0.208233	0.422729
216	SPEN	-0.0307773	0.615499	0.615499	0.753622
217	ZBTB17	0.00729057	0.910341	0.910341	0.949753
218	HSPB7	0.000579042	0.397054	0.397054	0.596426
219	CLCNKB	-0.00258492	0.0163125	0.0163125	0.0980302
220	FAM131C	0.000370838	0.262011	0.262011	0.482771
221	EPHA2	-0.00186341	0.0255547	0.0255547	0.125594
222	AL451042.2	-0.00417143	0.0253486	0.0253486	0.124951
223	ARHGEF19	-0.00362485	0.43503	0.43503	0.621412
224	CPLANE2	0.0237056	0.385402	0.385402	0.587884
225	FBXO42	0.0667718	0.364688	0.364688	0.572879
226	SZRD1	-0.0122635	0.834138	0.834138	0.904253
227	SPATA21	0.0181166	0.512013	0.512013	0.677254
228	NECAP2	-0.0804299	0.0588153	0.0588153	0.204199
229	LINC01772	-0.0377863	0.233391	0.233391	0.451512
230	AL137802.2	-0.000416249	0.0105342	0.0105342	0.0797667
231	NBPF1	-0.00370902	0.93043	0.93043	0.961021
232	AL137798.2	-0.000377326	0.258578	0.258578	0.47908
233	CROCC	-0.00481048	0.738635	0.738635	0.841226
234	BX284668.5	0.118092	0.0412319	0.0412319	0.166034
235	BX284668.6	-0.0160842	0.0394475	0.0394475	0.161647
236	MFAP2	-0.00138729	0.102329	0.102329	0.281375
237	ATP13A2	0.00763318	0.862368	0.862368	0.92221
238	SDHB	0.0101064	0.84488	0.84488	0.911084
239	PADI2	-0.372847	6.41154e-06	6.41154e-06	0.000208256
240	PADI1	-0.00769886	0.0341878	0.0341878	0.147951
241	PADI3	0.000531496	0.032903	0.032903	0.145028
242	PADI4	0.120722	0.241938	0.241938	0.460907
243	PADI6	-0.0030673	0.48954	0.48954	0.660377
244	RCC2	-0.0333114	0.314171	0.314171	0.531309
245	ARHGEF10L	-0.00258158	0.951576	0.951576	0.974736
246	IGSF21	0.00170798	0.112602	0.112602	0.297187
247	KLHDC7A	0.000361766	0.137525	0.137525	0.33398
248	ALDH4A1	-0.0122968	0.550849	0.550849	0.706742
249	IFFO2	0.0190495	0.640816	0.640816	0.77105
250	UBR4	-0.0668278	0.397734	0.397734	0.596614
251	AL035413.1	0.0169314	0.715815	0.715815	0.82611
252	EMC1	-0.0336516	0.28381	0.28381	0.504496
253	MRTO4	0.00926467	0.804155	0.804155	0.885333
254	AKR7A3	-0.00560668	0.207904	0.207904	0.422405
255	AKR7A2	0.021095	0.429558	0.429558	0.61695
256	PQLC2	-0.040328	0.419227	0.419227	0.609778
257	CAPZB	0.0908243	0.213806	0.213806	0.429363
258	MINOS1	0.154485	0.00364717	0.00364717	0.0425595
259	NBL1	0.00167395	0.0774348	0.0774348	0.240496
260	TMCO4	-0.014832	0.0423955	0.0423955	0.16851
261	OTUD3	0.0217175	0.480353	0.480353	0.654068
262	PLA2G2D	-0.00520497	0.0871676	0.0871676	0.257205
263	Z98257.1	-0.00330665	0.0529233	0.0529233	0.191846
264	PLA2G2C	0.00165371	0.184804	0.184804	0.396548
265	UBXN10-AS1	0.135765	0.0241057	0.0241057	0.121818
266	UBXN10	0.0222855	0.411768	0.411768	0.605166
267	CAMK2N1	0.00109537	0.01859	0.01859	0.104265
268	MUL1	-0.0113626	0.866585	0.866585	0.92467
269	CDA	0.584959	4.00667e-06	4.00667e-06	0.000137237
270	PINK1	-0.00752107	0.880007	0.880007	0.932362
271	PINK1-AS	-0.000692222	0.581816	0.581816	0.729984
272	DDOST	-0.00672489	0.824171	0.824171	0.898048
273	KIF17	-0.00234379	0.554949	0.554949	0.709616
274	SH2D5	0.0239044	0.38017	0.38017	0.584805
275	HP1BP3	0.0665445	0.184125	0.184125	0.395557
276	EIF4G3	0.124346	0.118366	0.118366	0.305397
277	ECE1	-1.00952	1.96079e-43	1e-30	2.07493e-40
278	AL031005.1	-0.00407122	0.356825	0.356825	0.566722
279	AL031728.1	-0.0806156	2.04081e-05	2.04081e-05	0.000572279
280	NBPF3	-0.0121195	0.113757	0.113757	0.299115
281	ALPL	0.0319087	0.799303	0.799303	0.881702
282	AL359815.1	-0.0166543	0.0600652	0.0600652	0.206687
283	RAP1GAP	-0.0125597	0.0961382	0.0961382	0.271673
284	USP48	0.0581599	0.203856	0.203856	0.417981
285	HSPG2	-0.0057232	0.022861	0.022861	0.117868
286	LINC01635	-0.00618377	0.17194	0.17194	0.380773
287	CDC42	0.100382	0.202345	0.202345	0.416454
288	AL031281.2	-0.0169017	0.0305847	0.0305847	0.139
289	WNT4	0.000220036	0.0574023	0.0574023	0.201125
290	ZBTB40	-0.0526007	0.240425	0.240425	0.459211
291	C1QA	-0.00160894	0.942129	0.942129	0.968657
292	C1QC	-0.0140809	0.555931	0.555931	0.710367
293	C1QB	0.0380285	0.14959	0.14959	0.351936
294	EPHB2	-0.00956547	0.144286	0.144286	0.343803
295	KDM1A	0.0398009	0.323674	0.323674	0.539216
296	LUZP1	-0.00425168	0.904977	0.904977	0.946923
297	LINC01355	0.0505287	0.184363	0.184363	0.395984
298	HNRNPR	-0.0193163	0.576289	0.576289	0.725675
299	ZNF436	0.0158285	0.565858	0.565858	0.717986
300	ZNF436-AS1	-0.0025671	0.0394274	0.0394274	0.161616
301	TCEA3	-0.00156065	0.00848056	0.00848056	0.0769177
302	ASAP3	0.000521903	0.0303021	0.0303021	0.138404
303	E2F2	-0.0110925	0.790633	0.790633	0.876369
304	ID3	-0.0331193	0.00117157	0.00117157	0.0174995
305	MDS2	0.000239932	0.491819	0.491819	0.66197
306	RPL11	0.209206	7.01967e-05	7.01967e-05	0.001717
307	ELOA	-0.0545693	0.00919793	0.00919793	0.0769594
308	ELOA-AS1	-0.00321075	0.487529	0.487529	0.659401
309	PITHD1	-0.0188125	0.610328	0.610328	0.750214
310	LYPLA2	-0.00414371	0.935044	0.935044	0.964004
311	GALE	0.0459792	0.334832	0.334832	0.548352
312	HMGCL	0.0806235	0.207127	0.207127	0.421464
313	FUCA1	-0.0339947	0.0504129	0.0504129	0.18629
314	CNR2	-0.00512524	0.246572	0.246572	0.465544
315	PNRC2	0.0344368	0.547372	0.547372	0.70444
316	SRSF10	0.0651065	0.253665	0.253665	0.473501
317	MYOM3	-0.00674228	0.0325898	0.0325898	0.144483
318	IL22RA1	-8.06626e-05	0.79233	0.79233	0.877621
319	IFNLR1	-0.00134459	0.508842	0.508842	0.675185
320	GRHL3	0.00108188	0.00914795	0.00914795	0.0769594
321	STPG1	0.0255739	0.406271	0.406271	0.601429
322	NIPAL3	-0.00848343	0.439252	0.439252	0.624536
323	RCAN3	0.0141773	0.630703	0.630703	0.763956
324	AL445686.2	-0.001505	0.587981	0.587981	0.734472
325	NCMAP	0.000207269	0.4885	0.4885	0.659756
326	SRRM1	0.215327	0.000924676	0.000924676	0.0143786
327	CLIC4	-0.181754	0.00465349	0.00465349	0.0510437
328	RUNX3	-0.0343982	0.382361	0.382361	0.586314
329	AL445471.1	0.000316531	0.715611	0.715611	0.826018
330	AL445471.2	3.79208e-05	0.870401	0.870401	0.927217
331	AL031432.1	-0.000726245	0.192334	0.192334	0.40627
332	SYF2	0.104052	0.173037	0.173037	0.382274
333	AL031432.5	-0.00465935	0.303212	0.303212	0.5228
334	RSRP1	-0.483272	5.28386e-13	5.28386e-13	5.93505e-11
335	AL031432.3	-0.00389423	0.379623	0.379623	0.584452
336	RHD	-0.00847846	0.173965	0.173965	0.383608
337	TMEM50A	0.392791	1.06476e-07	1.06476e-07	5.04908e-06
338	RHCE	-0.00782759	0.210635	0.210635	0.425331
339	MACO1	-0.028007	0.512951	0.512951	0.678151
340	LDLRAP1	-0.00927458	0.108382	0.108382	0.290279
341	MAN1C1	-0.00598269	0.125097	0.125097	0.316995
342	SELENON	-0.0278641	0.115683	0.115683	0.301755
343	AL020996.1	-0.00717607	0.186976	0.186976	0.399378
344	MTFR1L	0.0657402	0.248327	0.248327	0.467791
345	AUNIP	0.000956739	0.0149048	0.0149048	0.0935316
346	AL033528.2	-0.00971541	0.132554	0.132554	0.327011
347	PAQR7	-0.00140528	0.242702	0.242702	0.461663
348	STMN1	-0.00333608	0.786289	0.786289	0.873914
349	PAFAH2	0.01651	0.678227	0.678227	0.799375
350	EXTL1	-0.00148397	0.0669104	0.0669104	0.21889
351	PDIK1L	-0.00532477	0.73235	0.73235	0.836627
352	FAM110D	0.000920873	0.00852597	0.00852597	0.0769177
353	AL391650.1	0.00132639	0.0197839	0.0197839	0.107857
354	ZNF593	0.0607901	0.139323	0.139323	0.336725
355	CNKSR1	0.000145062	0.117804	0.117804	0.304638
356	CEP85	-0.00948552	0.747282	0.747282	0.8469
357	SH3BGRL3	0.589351	2.09894e-15	2.09894e-15	3.08038e-13
358	UBXN11	-0.0337858	0.294923	0.294923	0.515852
359	CD52	-0.0484472	0.0431759	0.0431759	0.170415
360	CRYBG2	-0.00331317	0.0403342	0.0403342	0.16383
361	ZNF683	0.0024083	0.279581	0.279581	0.500735
362	DHDDS	0.00271528	0.956584	0.956584	0.977539
363	HMGN2	-0.036493	0.485625	0.485625	0.658213
364	RPS6KA1	-0.144253	0.0499278	0.0499278	0.185075
365	AL512408.1	0.000537575	0.0122006	0.0122006	0.085028
366	ARID1A	-0.0548375	0.304305	0.304305	0.523429
367	PIGV	0.00959334	0.833667	0.833667	0.903938
368	ZDHHC18	-0.426795	8.8044e-06	8.8044e-06	0.000275305
369	SFN	-0.0176055	0.00822237	0.00822237	0.0769177
370	GPN2	-0.00251407	0.936536	0.936536	0.964849
371	GPATCH3	0.101181	0.208999	0.208999	0.423603
372	NUDC	0.0617107	0.133941	0.133941	0.329217
373	KDF1	0.0278365	0.30214	0.30214	0.522116
374	TRNP1	-0.00481389	0.276724	0.276724	0.497569
375	TENT5B	0.00071074	0.0985973	0.0985973	0.275256
376	SLC9A1	-0.199127	0.000627398	0.000627398	0.0105472
377	WDTC1	-0.0264337	0.580451	0.580451	0.728772
378	TMEM222	0.103698	0.14679	0.14679	0.3476
379	SYTL1	-0.0414346	0.0933702	0.0933702	0.267515
380	MAP3K6	-0.0214242	0.0200074	0.0200074	0.108633
381	CD164L2	-0.00540376	0.227391	0.227391	0.444869
382	GPR3	-0.0378404	0.00439394	0.00439394	0.0489986
383	WASF2	-0.0698296	0.0921029	0.0921029	0.265547
384	BX293535.1	0.000881277	0.156308	0.156308	0.360677
385	AHDC1	0.00441996	0.911822	0.911822	0.950542
386	FGR	-0.64224	2.05944e-16	2.05944e-16	3.28628e-14
387	LINC02574	-0.000629923	0.239033	0.239033	0.457322
388	IFI6	0.019731	0.650191	0.650191	0.778232
389	AL445490.1	-0.0093497	0.134411	0.134411	0.329892
390	FAM76A	0.0778155	0.226679	0.226679	0.443909
391	STX12	-0.14639	0.00764817	0.00764817	0.0744349
392	PPP1R8	0.058915	0.254364	0.254364	0.474353
393	THEMIS2	-0.241447	0.000684939	0.000684939	0.0112788
394	RPA2	0.0662838	0.2678	0.2678	0.489
395	SMPDL3B	-0.0175606	0.0468983	0.0468983	0.178317
396	XKR8	0.151171	0.0378676	0.0378676	0.157698
397	EYA3	-0.126657	0.0787663	0.0787663	0.242523
398	PTAFR	-0.608314	5.05677e-17	5.05677e-17	9.24285e-15
399	DNAJC8	0.369175	7.37932e-06	7.37932e-06	0.000235132
400	ATP5IF1	0.107243	0.0123775	0.0123775	0.0856961
401	AL353622.1	0.0156748	0.571102	0.571102	0.721993
402	SESN2	-0.0530742	0.499699	0.499699	0.668147
403	MED18	0.0641642	0.317521	0.317521	0.534009
404	PHACTR4	-0.0178208	0.654381	0.654381	0.781526
405	RCC1	-0.0142774	0.74621	0.74621	0.84633
406	TRNAU1AP	0.0159897	0.73989	0.73989	0.842178
407	SNHG12	-0.0245558	0.460621	0.460621	0.639236
408	TAF12	0.220845	0.010935	0.010935	0.0807415
409	RAB42	0.0475289	0.249503	0.249503	0.468963
410	LINC01715	-0.00821916	0.193978	0.193978	0.40822
411	AL360012.1	-0.0304679	0.00425332	0.00425332	0.047882
412	GMEB1	0.184149	0.0257486	0.0257486	0.126133
413	YTHDF2	0.049566	0.297449	0.297449	0.5181
414	EPB41	-0.0168075	0.829888	0.829888	0.901719
415	TMEM200B	-0.00294961	0.0653879	0.0653879	0.215841
416	SRSF4	-0.00972408	0.865697	0.865697	0.924131
417	MECR	-0.0176537	0.0150514	0.0150514	0.0941538
418	PTPRU	7.6105e-05	0.907451	0.907451	0.948394
419	MATN1	-0.0160025	0.0392406	0.0392406	0.161278
420	MATN1-AS1	-0.0357831	0.00462363	0.00462363	0.0508665
421	LAPTM5	-0.453239	3.81182e-09	3.81182e-09	2.31542e-07
422	LINC01778	0.000652772	0.0520177	0.0520177	0.189985
423	SDC3	-0.0105738	0.116126	0.116126	0.302399
424	PUM1	-0.109166	0.0101283	0.0101283	0.0787467
425	SNRNP40	0.0950181	0.0577589	0.0577589	0.201895
426	ZCCHC17	0.0830694	0.0996526	0.0996526	0.277164
427	AL451070.1	0.0009084	0.0176482	0.0176482	0.10144
428	FABP3	0.0331531	0.198914	0.198914	0.412953
429	SERINC2	0.038731	0.334684	0.334684	0.548156
430	TINAGL1	0.00252197	0.016979	0.016979	0.100073
431	HCRTR1	0.0017977	0.0570044	0.0570044	0.200197
432	PEF1	-0.00333785	0.955459	0.955459	0.977044
433	AC114488.2	-0.00532988	0.229166	0.229166	0.44672
434	AC114488.3	-0.0071155	0.170974	0.170974	0.379635
435	COL16A1	-0.00193222	0.0331389	0.0331389	0.145542
436	ADGRB2	-0.000720418	0.378288	0.378288	0.583987
437	SPOCD1	-0.00208669	0.400051	0.400051	0.597879
438	AL354919.1	-0.00669341	0.148575	0.148575	0.35041
439	AL136115.2	0.0161277	0.55948	0.55948	0.712722
440	PTP4A2	0.200694	0.00853294	0.00853294	0.0769177
441	KHDRBS1	-0.10348	0.0457849	0.0457849	0.176152
442	AL445248.1	-0.00103315	0.132196	0.132196	0.326705
443	TMEM39B	-0.0162472	0.0341335	0.0341335	0.14782
444	KPNA6	-0.0535736	0.178459	0.178459	0.389037
445	TXLNA	0.0721896	0.225365	0.225365	0.442671
446	CCDC28B	-0.0102693	0.158023	0.158023	0.362939
447	AL049795.1	-0.00349884	0.0232331	0.0232331	0.119165
448	IQCC	-0.00633554	0.161871	0.161871	0.368134
449	DCDC2B	-0.000466245	0.0180912	0.0180912	0.102933
450	TMEM234	-0.0625001	0.150879	0.150879	0.35379
451	EIF3I	0.0146586	0.772704	0.772704	0.864616
452	FAM167B	-0.00019229	0.429994	0.429994	0.617313
453	LCK	-0.00840531	0.198297	0.198297	0.412407
454	HDAC1	0.11494	0.0590239	0.0590239	0.204468
455	MARCKSL1	-0.0274602	0.685216	0.685216	0.805249
456	TSSK3	-0.0040141	0.364761	0.364761	0.572879
457	FAM229A	0.0139957	0.616172	0.616172	0.754033
458	BSDC1	-0.0574485	0.262116	0.262116	0.482875
459	ZBTB8A	0.0241591	0.370234	0.370234	0.577714
460	ZBTB8OS	0.321243	2.73893e-05	2.73893e-05	0.000744176
461	RBBP4	0.025614	0.491726	0.491726	0.66189
462	SYNC	-0.0097401	0.13036	0.13036	0.324586
463	KIAA1522	-0.00413423	0.130661	0.130661	0.324892
464	YARS	-0.00781229	0.853703	0.853703	0.916861
465	S100PBP	0.0625819	0.287956	0.287956	0.50889
466	FNDC5	-4.19665e-05	0.937733	0.937733	0.965441
467	HPCA	0.000899794	0.0110285	0.0110285	0.0810993
468	TMEM54	-0.0386371	0.00227003	0.00227003	0.0295222
469	RNF19B	-0.318488	2.09436e-05	2.09436e-05	0.000586479
470	AK2	-0.0646453	0.157424	0.157424	0.362219
471	AZIN2	-0.0019715	0.120542	0.120542	0.309174
472	TRIM62	-0.0133842	0.0845801	0.0845801	0.252602
473	ZNF362	-0.0170488	0.0375741	0.0375741	0.156963
474	A3GALT2	0.000562985	0.00969262	0.00969262	0.0775225
475	AL513327.1	0.000258299	0.0666758	0.0666758	0.218301
476	PHC2	0.122501	0.149946	0.149946	0.352283
477	ZSCAN20	-0.0164658	0.0485508	0.0485508	0.18212
478	SMIM12	0.0431689	0.335112	0.335112	0.548589
479	GJB5	-0.000106764	0.325037	0.325037	0.5405
480	GJB4	6.04734e-05	0.026186	0.026186	0.127173
481	GJB3	0.000279418	0.0820111	0.0820111	0.247845
482	GJA4	-0.00193481	0.0116025	0.0116025	0.0828994
483	DLGAP3	-0.0115697	0.106357	0.106357	0.287459
484	AC114490.3	6.34992e-06	0.99301	0.99301	0.996148
485	AC114490.2	-0.0362229	0.00202475	0.00202475	0.0270856
486	TMEM35B	0.0549138	0.157889	0.157889	0.36276
487	ZMYM6	0.0259886	0.600366	0.600366	0.743927
488	ZMYM1	-0.0288925	0.0094977	0.0094977	0.0772986
489	AL590434.1	0.000275239	0.0293994	0.0293994	0.135855
490	SFPQ	-0.192587	5.57318e-05	5.57318e-05	0.00140068
491	ZMYM4	-0.0682626	6.45723e-06	6.45723e-06	0.000209402
492	ZMYM4-AS1	-0.00193651	0.67259	0.67259	0.795382
493	KIAA0319L	-0.122856	0.014327	0.014327	0.0913312
494	NCDN	0.0120135	0.677143	0.677143	0.798662
495	AC004865.2	-0.00572723	0.392954	0.392954	0.593392
496	TFAP2E	-0.00721134	0.127816	0.127816	0.320953
497	PSMB2	0.249305	4.54441e-06	4.54441e-06	0.000153821
498	C1orf216	0.0159623	0.690728	0.690728	0.809631
499	CLSPN	-0.019823	0.323664	0.323664	0.539216
500	AGO4	-0.0720718	0.354927	0.354927	0.565509
501	AGO1	-0.125315	9.50096e-09	9.50096e-09	5.44235e-07
502	AL139286.2	-0.00375686	0.398789	0.398789	0.596953
503	AGO3	-0.175046	0.0112615	0.0112615	0.0818237
504	TEKT2	-0.00243794	0.00930967	0.00930967	0.0769928
505	ADPRHL2	-0.0258758	0.180308	0.180308	0.391329
506	COL8A2	-0.0280413	0.00556856	0.00556856	0.0588342
507	TRAPPC3	0.139601	0.050246	0.050246	0.186049
508	MAP7D1	-0.085903	0.218471	0.218471	0.434294
509	THRAP3	0.0881849	0.211889	0.211889	0.426874
510	SH3D21	-0.201376	0.0378535	0.0378535	0.157672
511	EVA1B	-0.0618295	0.312567	0.312567	0.53029
512	AL591845.1	-0.0442476	0.455795	0.455795	0.635646
513	STK40	-0.37747	1.15883e-06	1.15883e-06	4.52415e-05
514	LSM10	0.0162668	0.806249	0.806249	0.886652
515	OSCP1	-0.0246899	0.0135794	0.0135794	0.0889641
516	MRPS15	0.0584635	0.125756	0.125756	0.317844
517	CSF3R	-0.88101	3.08949e-25	3.08949e-25	9.70583e-23
518	LINC01137	0.080937	0.158674	0.158674	0.363525
519	ZC3H12A	-0.378859	1.46807e-07	1.46807e-07	6.76994e-06
520	MEAF6	0.0243172	0.406939	0.406939	0.601749
521	SNIP1	-0.151882	0.0365465	0.0365465	0.154161
522	DNALI1	-0.000354843	0.775054	0.775054	0.866072
523	GNL2	-0.00151443	0.980171	0.980171	0.989208
524	C1orf109	-0.0463805	0.000723899	0.000723899	0.0118427
525	CDCA8	0.00745368	0.793123	0.793123	0.878151
526	MANEAL	-0.00293182	0.107949	0.107949	0.289544
527	AL929472.3	0.000111453	0.831547	0.831547	0.902515
528	YRDC	0.00927786	0.849303	0.849303	0.913951
529	C1orf122	-0.00237181	0.961175	0.961175	0.979854
530	MTF1	-0.270937	0.000645954	0.000645954	0.010787
531	AL929472.2	-0.00433699	0.325442	0.325442	0.540534
532	INPP5B	-0.0551113	0.0876048	0.0876048	0.258078
533	SF3A3	0.0445701	0.401986	0.401986	0.598689
534	FHL3	0.000620182	0.992918	0.992918	0.996148
535	UTP11	0.202428	0.00418585	0.00418585	0.0472548
536	POU3F1	-0.00452701	0.0573269	0.0573269	0.200944
537	RRAGC	-0.100663	0.249646	0.249646	0.468969
538	AL139260.1	0.436212	0.000944692	0.000944692	0.0145995
539	MYCBP	-0.00931193	0.825805	0.825805	0.898905
540	RHBDL2	-2.85921e-05	0.805624	0.805624	0.886244
541	AKIRIN1	-0.231248	5.48985e-05	5.48985e-05	0.00138146
542	NDUFS5	0.055713	0.112777	0.112777	0.297415
543	MACF1	-0.0314055	0.592779	0.592779	0.738348
544	BMP8A	-0.00162897	0.144414	0.144414	0.343946
545	PABPC4	0.0346331	0.448263	0.448263	0.630617
546	AL365277.1	-0.00780561	0.21497	0.21497	0.43057
547	HPCAL4	0.00016218	0.487573	0.487573	0.659401
548	PPIE	0.0614927	0.167923	0.167923	0.375765
549	BMP8B	0.026185	0.330697	0.330697	0.544553
550	OXCT2	-0.011404	0.142212	0.142212	0.340476
551	AL033527.3	-0.000181944	0.209253	0.209253	0.42386
552	AL033527.5	0.00957944	0.812971	0.812971	0.890817
553	AL033527.4	-0.00392803	0.385129	0.385129	0.587791
554	TRIT1	-0.0112582	0.0251863	0.0251863	0.124519
555	MYCL	-0.0130084	0.108485	0.108485	0.29044
556	AL033527.2	0.000836579	0.0332218	0.0332218	0.145778
557	MFSD2A	-0.154674	0.0115596	0.0115596	0.0826812
558	CAP1	0.334023	8.32224e-05	8.32224e-05	0.0019802
559	PPT1	0.11919	0.0761437	0.0761437	0.237909
560	RLF	-0.227008	0.003402	0.003402	0.0403068
561	AL050341.2	-0.0132693	0.659665	0.659665	0.785643
562	ZMPSTE24	-0.00249252	0.956098	0.956098	0.97734
563	COL9A2	-0.0281141	0.365685	0.365685	0.573739
564	SMAP2	0.0670007	0.357209	0.357209	0.567039
565	AL031985.4	0.000527502	0.0867615	0.0867615	0.256266
566	ZFP69B	-0.0052842	0.245309	0.245309	0.464424
567	ZFP69	-0.00469245	0.294071	0.294071	0.514989
568	AL603839.3	0.00188338	0.00859322	0.00859322	0.0769177
569	EXO5	0.0166755	0.549101	0.549101	0.705563
570	AL603839.1	-0.00101333	0.0286117	0.0286117	0.133628
571	ZNF684	0.00364261	0.898866	0.898866	0.942951
572	RIMS3	-0.0051218	0.247181	0.247181	0.466388
573	NFYC-AS1	-0.0103686	0.722378	0.722378	0.830006
574	NFYC	-0.0230103	0.731986	0.731986	0.836449
575	KCNQ4	9.96277e-05	0.859742	0.859742	0.920668
576	CITED4	-0.00752926	0.799205	0.799205	0.881647
577	CTPS1	0.000822378	0.978013	0.978013	0.988187
578	SLFNL1-AS1	-0.000208892	0.87998	0.87998	0.932362
579	SCMH1	-0.0118065	0.511227	0.511227	0.67677
580	FOXO6	0.00105423	0.0114332	0.0114332	0.0821575
581	EDN2	-6.36981e-05	0.836811	0.836811	0.905993
582	HIVEP3	0.0229314	0.654991	0.654991	0.782022
583	FOXJ3	0.106398	0.0918827	0.0918827	0.26524
584	ZMYND12	0.0263424	0.295629	0.295629	0.516564
585	PPCS	0.0304379	0.426019	0.426019	0.614626
586	CCDC30	0.0158654	0.675175	0.675175	0.797525
587	PPIH	0.0241429	0.484658	0.484658	0.657171
588	YBX1	0.0657858	0.204148	0.204148	0.418361
589	P3H1	-0.0371703	0.144521	0.144521	0.34412
590	C1orf50	0.110915	0.070106	0.070106	0.225962
591	AC098484.3	-0.0177907	0.026537	0.026537	0.127993
592	TMEM269	-0.000240694	0.700861	0.700861	0.816237
593	SVBP	0.222406	0.00298127	0.00298127	0.036461
594	ERMAP	0.0110179	0.710864	0.710864	0.822645
595	AL512353.1	-0.00826176	0.168115	0.168115	0.375915
596	ZNF691	0.0161618	0.559112	0.559112	0.712504
597	SLC2A1	0.0239121	0.552946	0.552946	0.708151
598	SLC2A1-AS1	0.000345787	0.0314891	0.0314891	0.141637
599	FAM183A	-0.00045971	0.634325	0.634325	0.766497
600	EBNA1BP2	0.0131377	0.670944	0.670944	0.794402
601	CFAP57	4.6962e-05	0.933444	0.933444	0.962749
602	TMEM125	-0.0063802	0.156163	0.156163	0.360485
603	C1orf210	0.000838399	0.0208336	0.0208336	0.111079
604	TIE1	0.000993256	0.0671296	0.0671296	0.219244
605	AL139289.2	-0.014097	0.0700059	0.0700059	0.225686
606	CDC20	0.000530935	0.797432	0.797432	0.880835
607	ELOVL1	0.110043	0.0590339	0.0590339	0.204468
608	MED8	0.109207	0.055388	0.055388	0.197208
609	AL139289.1	-0.000658336	0.00850949	0.00850949	0.0769177
610	SZT2	-0.0539873	0.249292	0.249292	0.468875
611	HYI	0.0140563	0.404082	0.404082	0.599991
612	PTPRF	-0.00145589	0.00938061	0.00938061	0.077004
613	AL451062.3	0.00185024	0.948584	0.948584	0.972731
614	KDM4A	0.00441289	0.897677	0.897677	0.942371
615	KDM4A-AS1	-0.00274601	0.110894	0.110894	0.294613
616	ST3GAL3	0.042597	0.268711	0.268711	0.489952
617	ARTN	0.000117664	0.808983	0.808983	0.888397
618	IPO13	0.0306818	0.50606	0.50606	0.673143
619	DPH2	-0.0237991	0.0159416	0.0159416	0.0970641
620	ATP6V0B	0.609065	2.82882e-14	2.82882e-14	3.79175e-12
621	B4GALT2	0.00168089	0.221437	0.221437	0.438211
622	CCDC24	-0.00880986	0.765341	0.765341	0.859864
623	SLC6A9	-0.0153261	0.0478527	0.0478527	0.180632
624	AL139220.2	-0.000800254	0.197021	0.197021	0.411007
625	DMAP1	0.0294098	0.49269	0.49269	0.662655
626	ERI3	0.066616	0.101288	0.101288	0.279586
627	RNF220	0.133426	0.0443045	0.0443045	0.172918
628	TMEM53	-0.011763	0.585049	0.585049	0.732268
629	ARMH1	0.0867271	0.094634	0.094634	0.269277
630	KIF2C	-0.00686099	0.205627	0.205627	0.419825
631	AL592166.1	0.00137357	0.0249614	0.0249614	0.124134
632	RPS8	0.220223	3.12302e-05	3.12302e-05	0.000837219
633	BEST4	-0.0271177	0.0123081	0.0123081	0.0854217
634	PLK3	-0.877505	4.68537e-31	1e-30	2.24295e-28
635	TCTEX1D4	-0.0265911	0.0110162	0.0110162	0.0810433
636	BTBD19	-0.619789	1.22316e-19	1.22316e-19	2.67313e-17
637	PTCH2	0.0192061	0.697104	0.697104	0.813558
638	EIF2B3	-0.000877251	0.977513	0.977513	0.98793
639	HECTD3	0.048637	0.393652	0.393652	0.594002
640	UROD	0.0699659	0.130652	0.130652	0.324892
641	ZSWIM5	-0.00762127	0.0989177	0.0989177	0.275845
642	LINC01144	-0.000498489	0.274347	0.274347	0.495645
643	HPDL	0.00135938	0.162322	0.162322	0.368677
644	MUTYH	-0.0536149	0.000217549	0.000217549	0.00444444
645	TOE1	-0.0114814	0.745345	0.745345	0.845946
646	TESK2	-0.054461	0.43582	0.43582	0.62199
647	CCDC163	0.0122311	0.556598	0.556598	0.711034
648	MMACHC	0.0159601	0.595183	0.595183	0.740058
649	PRDX1	0.0196919	0.641379	0.641379	0.771444
650	AKR1A1	0.0472296	0.334472	0.334472	0.547987
651	NASP	-0.0168416	0.617889	0.617889	0.755352
652	CCDC17	0.0132544	0.722824	0.722824	0.830274
653	GPBP1L1	-0.0532426	0.333805	0.333805	0.547384
654	TMEM69	0.0653336	0.212522	0.212522	0.427725
655	IPP	0.0397627	0.411781	0.411781	0.605166
656	MAST2	-0.0359645	0.24481	0.24481	0.463961
657	PIK3R3	-0.016798	0.0226362	0.0226362	0.117233
658	TSPAN1	-0.0120168	0.00405224	0.00405224	0.0462512
659	POMGNT1	0.0522474	0.216519	0.216519	0.432093
660	LURAP1	0.00121444	0.180437	0.180437	0.391342
661	RAD54L	-0.0122044	0.072101	0.072101	0.22945
662	LRRC41	0.0561453	0.268885	0.268885	0.490136
663	UQCRH	0.0512998	0.246563	0.246563	0.465544
664	NSUN4	-0.0311358	0.596924	0.596924	0.741444
665	FAAH	-0.0131814	0.0630076	0.0630076	0.211604
666	DMBX1	-0.0153245	0.0303507	0.0303507	0.138412
667	MKNK1	0.142942	0.145858	0.145858	0.346203
668	MOB3C	0.0874394	0.192594	0.192594	0.40658
669	ATPAF1	0.00908655	0.774854	0.774854	0.86596
670	EFCAB14	-0.0314875	0.453847	0.453847	0.634301
671	CYP4B1	-0.00895668	0.0601143	0.0601143	0.206808
672	CYP4X1	-0.000297535	0.0616444	0.0616444	0.209366
673	PDZK1IP1	-0.00325456	0.473797	0.473797	0.649099
674	STIL	-0.00476973	0.323354	0.323354	0.539197
675	CMPK1	0.0243246	0.481706	0.481706	0.65527
676	FOXD2-AS1	-0.0161566	0.0372542	0.0372542	0.156115
677	FOXD2	-0.00139747	0.730706	0.730706	0.835556
678	SLC5A9	0.0459347	0.2337	0.2337	0.451685
679	SPATA6	0.00831233	0.768991	0.768991	0.862461
680	AGBL4	-0.00099076	0.0100986	0.0100986	0.0786985
681	BEND5	-0.000303751	0.194995	0.194995	0.409095
682	ELAVL4	0.0287308	0.285677	0.285677	0.506511
683	DMRTA2	-0.00193661	0.0740913	0.0740913	0.233565
684	FAF1	0.0801671	0.129511	0.129511	0.323383
685	CDKN2C	0.0123392	0.663154	0.663154	0.787978
686	RNF11	0.16191	0.0488024	0.0488024	0.182621
687	TTC39A	-0.00629883	0.162093	0.162093	0.368503
688	TTC39A-AS1	-0.000458903	0.0149922	0.0149922	0.0939364
689	EPS15	0.0616137	0.32663	0.32663	0.541492
690	AC104170.1	0.000623518	0.0804814	0.0804814	0.244916
691	OSBPL9	0.0818601	0.315585	0.315585	0.532642
692	NRDC	0.0315285	0.722385	0.722385	0.830006
693	AL050343.1	0.0170861	0.532815	0.532815	0.692711
694	AL050343.2	0.000840772	0.0173986	0.0173986	0.100925
695	RAB3B	-0.00844282	0.176634	0.176634	0.386948
696	TXNDC12	0.0766071	0.278594	0.278594	0.499546
697	KTI12	0.0352061	0.468171	0.468171	0.644817
698	AL445685.1	0.00105523	0.166097	0.166097	0.373928
699	BTF3L4	0.152322	0.0139207	0.0139207	0.08991
700	ZFYVE9	-0.00888534	0.155653	0.155653	0.359759
701	CC2D1B	-0.0717503	0.245947	0.245947	0.464975
702	ORC1	-0.00123592	0.523883	0.523883	0.686596
703	PRPF38A	-0.0682914	0.167033	0.167033	0.374901
704	TUT4	-0.0145722	0.788752	0.788752	0.875272
705	GPX7	0.0176393	0.526883	0.526883	0.688561
706	SHISAL2A	0.123627	0.116576	0.116576	0.30306
707	COA7	-0.00487574	0.907165	0.907165	0.948334
708	ZYG11B	0.226769	0.0101476	0.0101476	0.0787847
709	ZYG11A	-0.0016607	0.0324783	0.0324783	0.144273
710	ECHDC2	0.0362432	0.267445	0.267445	0.488575
711	SCP2	0.0471957	0.190864	0.190864	0.404162
712	SLC1A7	-0.000158604	0.507353	0.507353	0.67408
713	CPT2	0.0276428	0.485926	0.485926	0.658402
714	AL606760.2	-0.00400295	0.0418273	0.0418273	0.167395
715	C1orf123	-0.00943683	0.712854	0.712854	0.824103
716	AL606760.3	-0.00192142	0.0876921	0.0876921	0.258222
717	MAGOH	0.0432705	0.418659	0.418659	0.609526
718	AL606760.1	0.0204267	0.456687	0.456687	0.636147
719	LRP8	-0.0364249	0.00131502	0.00131502	0.0192706
720	LINC01771	-0.0030951	0.485784	0.485784	0.658254
721	AC119428.2	-0.00500928	0.257751	0.257751	0.478208
722	NDC1	-0.0299231	0.00131595	0.00131595	0.0192706
723	YIPF1	0.0222932	0.7063	0.7063	0.819296
724	DIO1	0.000963621	0.00889839	0.00889839	0.0769594
725	HSPB11	0.0160384	0.606259	0.606259	0.747773
726	LRRC42	-0.00960173	0.455309	0.455309	0.635284
727	LDLRAD1	-0.000175831	0.836709	0.836709	0.905993
728	TMEM59	0.283888	5.69731e-05	5.69731e-05	0.00142653
729	TCEANC2	0.0304828	0.477518	0.477518	0.65225
730	AL357673.1	0.00169617	0.216944	0.216944	0.432682
731	CYB5RL	0.0213963	0.433091	0.433091	0.619738
732	MRPL37	0.0167143	0.576141	0.576141	0.725535
733	SSBP3	-0.0323618	0.369581	0.369581	0.576925
734	SSBP3-AS1	0.000514461	0.0782609	0.0782609	0.241707
735	ACOT11	0.00257064	0.928392	0.928392	0.959754
736	MROH7	-0.00357628	0.419668	0.419668	0.60998
737	TTC4	0.0117033	0.724961	0.724961	0.831588
738	PARS2	-0.00319728	0.482911	0.482911	0.656085
739	TTC22	-0.00339091	0.450578	0.450578	0.632016
740	DHCR24	-0.0280098	0.000296314	0.000296314	0.00572305
741	AC096536.3	0.00166983	0.11304	0.11304	0.297915
742	TMEM61	0.000148636	0.318184	0.318184	0.534722
743	BSND	-0.00171381	0.0393115	0.0393115	0.161404
744	USP24	0.0695335	0.236814	0.236814	0.455199
745	MIR4422HG	-0.00189243	0.170335	0.170335	0.378802
746	AC119674.1	0.0653999	0.168329	0.168329	0.376196
747	AC119674.2	0.0204194	0.677632	0.677632	0.798949
748	PLPP3	0.475419	1.58673e-05	1.58673e-05	0.000460358
749	PRKAA2	0.026334	0.329467	0.329467	0.543451
750	FYB2	-0.00150182	0.0101913	0.0101913	0.0789083
751	C8B	-0.00650169	0.148615	0.148615	0.350423
752	DAB1	0.00104435	0.171593	0.171593	0.380472
753	OMA1	-0.0214725	0.01069	0.01069	0.0802757
754	TACSTD2	0.00175857	0.837509	0.837509	0.90628
755	MYSM1	-0.200274	1.24344e-05	1.24344e-05	0.000373789
756	JUN	0.0626336	0.339716	0.339716	0.552305
757	LINC01135	0.021056	0.440549	0.440549	0.624969
758	AL136985.2	-0.00380106	0.389663	0.389663	0.591332
759	AC105277.1	-0.0107057	0.705372	0.705372	0.818795
760	LINC01358	0.000414011	0.861042	0.861042	0.921396
761	AL592431.1	0.000629729	0.181697	0.181697	0.39269
762	AC093424.1	-0.00788124	0.849902	0.849902	0.914342
763	FGGY	-0.185266	0.0109863	0.0109863	0.0809254
764	HOOK1	0.0257373	0.340781	0.340781	0.55305
765	CYP2J2	0.000469674	0.0227914	0.0227914	0.117599
766	C1orf87	-0.0103701	0.0993158	0.0993158	0.276533
767	NFIA	-0.00599558	0.181114	0.181114	0.392104
768	TM2D1	0.0611942	0.30457	0.30457	0.523661
769	AC099791.2	3.62991e-05	0.854553	0.854553	0.917223
770	PATJ	-0.00159524	0.10667	0.10667	0.287863
771	L1TD1	-0.00441064	0.324189	0.324189	0.539581
772	USP1	-0.00199259	0.960856	0.960856	0.979854
773	DOCK7	0.0629769	0.151889	0.151889	0.355236
774	AC103923.1	-0.00125087	0.0655922	0.0655922	0.216125
775	ATG4C	0.00497974	0.860797	0.860797	0.92133
776	FOXD3-AS1	0.000596631	0.0647371	0.0647371	0.214574
777	FOXD3	0.000665444	0.150477	0.150477	0.353279
778	ALG6	0.0322017	0.336579	0.336579	0.549778
779	ITGB3BP	-0.012253	0.680993	0.680993	0.801595
780	EFCAB7	-0.0938125	3.77346e-06	3.77346e-06	0.000129913
781	PGM1	-0.0129912	0.797397	0.797397	0.880835
782	ROR1-AS1	0.055503	0.244511	0.244511	0.463776
783	CACHD1	-0.00140469	0.0155956	0.0155956	0.0960464
784	RAVER2	-0.0116771	0.0686427	0.0686427	0.222638
785	JAK1	0.131657	0.0582687	0.0582687	0.202901
786	AL357078.3	-0.0172757	0.0425187	0.0425187	0.168729
787	AL357078.1	-0.0308589	0.00514033	0.00514033	0.0554164
788	AK4	0.0839041	0.138777	0.138777	0.336052
789	DNAJC6	-0.0132784	0.0478666	0.0478666	0.180632
790	LEPROT	-0.0166318	0.781808	0.781808	0.87113
791	LEPR	-0.049161	0.00061968	0.00061968	0.0104349
792	PDE4B	-0.319466	4.05024e-05	4.05024e-05	0.00106172
793	SGIP1	0.0206937	0.448564	0.448564	0.630908
794	TCTEX1D1	-0.0053963	0.130203	0.130203	0.324394
795	WDR78	-0.0271842	0.381703	0.381703	0.585993
796	MIER1	0.203556	0.0188202	0.0188202	0.104763
797	SLC35D1	0.00814237	0.770081	0.770081	0.863346
798	C1orf141	-0.000142445	0.642971	0.642971	0.772726
799	IL23R	0.000914558	0.0119001	0.0119001	0.0840285
800	IL12RB2	-0.000547929	0.839054	0.839054	0.907377
801	SERBP1	0.0146777	0.720394	0.720394	0.828596
802	GADD45A	0.00502566	0.862518	0.862518	0.92221
803	GNG12	-0.00312863	0.297314	0.297314	0.517962
804	DIRAS3	0.000673906	0.04712	0.04712	0.178671
805	WLS	0.235966	0.014837	0.014837	0.0933216
806	DEPDC1	-0.00416761	0.364286	0.364286	0.572751
807	LRRC40	-0.00487992	0.735792	0.735792	0.839081
808	SRSF11	-0.0321753	0.464944	0.464944	0.641996
809	AL353771.1	0.000989728	0.032884	0.032884	0.145028
810	ANKRD13C	0.0315872	0.419839	0.419839	0.610095
811	HHLA3	-0.0131992	0.0402996	0.0402996	0.163756
812	CTH	-0.009358	0.125454	0.125454	0.31756
813	PTGER3	-0.00748597	0.106543	0.106543	0.287711
814	AL031429.1	0.00597844	0.834032	0.834032	0.904187
815	ZRANB2	0.0986621	0.131994	0.131994	0.32645
816	NEGR1	-0.000966502	0.0373225	0.0373225	0.156269
817	LRRIQ3	-0.00290731	0.437142	0.437142	0.62308
818	FPGT	0.025857	0.514315	0.514315	0.679159
819	FPGT-TNNI3K	0.00116955	0.0118431	0.0118431	0.0838629
820	ERICH3	-0.00148574	0.0169089	0.0169089	0.100025
821	CRYZ	-0.00246688	0.905082	0.905082	0.946952
822	TYW3	0.049249	0.257693	0.257693	0.478145
823	ACADM	0.027989	0.506529	0.506529	0.673384
824	RABGGTB	-0.0197052	0.520542	0.520542	0.683919
825	MSH4	-0.00858415	0.0711461	0.0711461	0.227926
826	ST6GALNAC3	0.0627226	0.486812	0.486812	0.658932
827	PIGK	0.0255945	0.529861	0.529861	0.690446
828	AK5	-0.00258252	0.190721	0.190721	0.403998
829	AC118549.1	0.00244131	0.955439	0.955439	0.977044
830	USP33	-0.0419639	0.350451	0.350451	0.561247
831	MIGA1	0.0552783	0.261122	0.261122	0.481575
832	NEXN-AS1	-0.00176515	0.0248403	0.0248403	0.123746
833	NEXN	0.00072589	0.238773	0.238773	0.457111
834	FUBP1	0.0353398	0.545992	0.545992	0.703384
835	DNAJB4	0.0704321	0.172315	0.172315	0.38135
836	GIPC2	0.00119205	0.0401872	0.0401872	0.16353
837	AC103591.3	0.0155272	0.635117	0.635117	0.767177
838	PTGFR	-0.0011653	0.243882	0.243882	0.463074
839	IFI44L	0.0814236	0.16749	0.16749	0.375299
840	IFI44	0.00199066	0.955752	0.955752	0.977135
841	LINC01781	-0.000954165	0.0287064	0.0287064	0.133829
842	ADGRL2	-0.00120271	0.013666	0.013666	0.0891592
843	LINC01725	-0.00614885	0.170029	0.170029	0.378394
844	TTLL7	-0.00464528	0.294758	0.294758	0.51568
845	AL359504.2	-0.000265321	0.560675	0.560675	0.713657
846	PRKACB	-0.00392185	0.702804	0.702804	0.817266
847	DNASE2B	0.0221752	0.418576	0.418576	0.609449
848	RPF1	0.0444884	0.316172	0.316172	0.533033
849	GNG5	0.685296	1.34442e-17	1.34442e-17	2.55009e-15
850	SPATA1	-0.0181814	0.631102	0.631102	0.764348
851	CTBS	0.250696	0.00853116	0.00853116	0.0769177
852	SSX2IP	0.023684	0.382479	0.382479	0.586406
853	LPAR3	0.000185537	0.726583	0.726583	0.83258
854	MCOLN2	-0.0494661	0.000427515	0.000427515	0.00772905
855	WDR63	-0.000423389	0.790208	0.790208	0.876043
856	MCOLN3	0.00513691	0.841119	0.841119	0.908507
857	SYDE2	0.00142797	0.041619	0.041619	0.166825
858	C1orf52	0.0592901	0.399833	0.399833	0.597699
859	BCL10	0.0793547	0.297807	0.297807	0.518504
860	AL078459.1	-0.00741621	0.236667	0.236667	0.455003
861	DDAH1	-0.00386616	0.384242	0.384242	0.587427
862	CYR61	-6.04949e-05	0.952016	0.952016	0.974952
863	ZNHIT6	-0.0153939	0.0208904	0.0208904	0.111264
864	COL24A1	0.0236743	0.380655	0.380655	0.585127
865	AL136382.1	-0.00558857	0.207595	0.207595	0.421991
866	ODF2L	0.0428262	0.251687	0.251687	0.471203
867	CLCA2	0.00122167	0.0728081	0.0728081	0.230821
868	CLCA4	-0.00342424	0.440944	0.440944	0.625309
869	AL356270.1	-0.000169477	0.313356	0.313356	0.530823
870	AL049597.2	0.00985285	0.728393	0.728393	0.833717
871	SH3GLB1	0.647084	4.13263e-12	4.13263e-12	4.01405e-10
872	SELENOF	0.213045	0.0022051	0.0022051	0.0289122
873	HS2ST1	0.0140943	0.819911	0.819911	0.895687
874	LINC01140	-0.0040228	0.364032	0.364032	0.572709
875	AC099062.1	0.00123067	0.0806227	0.0806227	0.245142
876	LMO4	0.0922679	0.0317182	0.0317182	0.142191
877	PKN2	0.0566519	0.454315	0.454315	0.634643
878	GTF2B	0.190784	0.00940218	0.00940218	0.077004
879	KYAT3	0.0319677	0.605185	0.605185	0.746952
880	RBMXL1	-0.0367408	0.573589	0.573589	0.723766
881	GBP3	0.0240292	0.702606	0.702606	0.817196
882	GBP1	0.15376	0.0600648	0.0600648	0.206687
883	GBP2	-0.0953916	0.216878	0.216878	0.432636
884	GBP7	0.0256977	0.339726	0.339726	0.552305
885	GBP4	0.220374	0.00608512	0.00608512	0.0630982
886	AC099063.4	0.0465434	0.227738	0.227738	0.445157
887	GBP5	0.291865	0.000960668	0.000960668	0.0147783
888	AC099063.1	-0.000698349	0.0245262	0.0245262	0.123065
889	GBP6	-0.0022871	0.0414683	0.0414683	0.166539
890	LRRC8B	-0.0233146	0.558707	0.558707	0.71228
891	LRRC8C-DT	0.0675063	0.13521	0.13521	0.330736
892	LRRC8C	0.0357807	0.431198	0.431198	0.618114
893	AC099568.2	-0.00502129	0.269126	0.269126	0.490354
894	LRRC8D	0.0179051	0.584792	0.584792	0.732119
895	ZNF326	-0.109114	6.23568e-07	6.23568e-07	2.60113e-05
896	ZNF644	0.0368562	0.470417	0.470417	0.646803
897	CDC7	-0.00705194	0.206465	0.206465	0.420905
898	TGFBR3	-0.0113505	0.703644	0.703644	0.817804
899	EPHX4	0.00124664	0.00849342	0.00849342	0.0769177
900	SETSIP	0.00121504	0.0154979	0.0154979	0.0957007
901	BTBD8	-0.0172511	0.0331704	0.0331704	0.145617
902	AC104836.1	0.00117309	0.205473	0.205473	0.419714
903	GLMN	-0.0121181	0.447487	0.447487	0.629921
904	RPAP2	-0.0117464	0.494186	0.494186	0.663601
905	GFI1	-0.0149027	0.0418713	0.0418713	0.167395
906	EVI5	0.0191242	0.675234	0.675234	0.797525
907	RPL5	0.127019	0.00178268	0.00178268	0.0243827
908	FAM69A	0.000335028	0.902374	0.902374	0.945151
909	MTF2	0.0779327	0.172224	0.172224	0.38119
910	TMED5	0.0721156	0.233868	0.233868	0.45187
911	CCDC18	-0.0584443	0.350159	0.350159	0.561047
912	DR1	-0.0261119	0.630186	0.630186	0.763672
913	FNBP1L	-0.0106285	0.0952289	0.0952289	0.270358
914	BCAR3	0.0289329	0.329444	0.329444	0.543451
915	DNTTIP2	0.011617	0.887797	0.887797	0.936412
916	GCLM	0.325355	0.000682972	0.000682972	0.011274
917	ABCA4	0.000162808	0.0247967	0.0247967	0.123651
918	ARHGAP29	0.0274602	0.309485	0.309485	0.528017
919	AC097059.1	0.000795151	0.0387246	0.0387246	0.15977
920	ABCD3	0.066908	0.188982	0.188982	0.401826
921	F3	-0.018902	0.693341	0.693341	0.811421
922	SLC44A3	-0.00010075	0.734195	0.734195	0.83802
923	CNN3	0.00105783	0.082275	0.082275	0.248307
924	ALG14	-0.00248306	0.886279	0.886279	0.935408
925	TMEM56	-0.000261999	0.318048	0.318048	0.534722
926	TMEM56-RWDD3	-0.00247703	0.0959161	0.0959161	0.27149
927	AC092802.1	-0.00102893	0.00886558	0.00886558	0.0769594
928	RWDD3	0.0961852	0.060369	0.060369	0.207271
929	PTBP2	0.0954619	0.197061	0.197061	0.411007
930	DPYD	-0.0154086	0.838418	0.838418	0.90693
931	DPYD-AS1	0.0239326	0.380213	0.380213	0.584805
932	SNX7	-0.00187663	0.516979	0.516979	0.681152
933	LINC01708	0.000806384	0.0267425	0.0267425	0.128664
934	PALMD	-0.00506926	0.253078	0.253078	0.472766
935	FRRS1	0.00470213	0.907099	0.907099	0.948334
936	AGL	0.0141162	0.696689	0.696689	0.813168
937	AC118553.1	0.000261371	0.0152816	0.0152816	0.0949184
938	SLC35A3	0.0689042	0.171876	0.171876	0.380671
939	AC118553.2	0.0151732	0.706197	0.706197	0.819225
940	MFSD14A	-0.0214954	0.747194	0.747194	0.846848
941	SASS6	0.0102229	0.774859	0.774859	0.86596
942	TRMT13	0.0043659	0.895755	0.895755	0.941505
943	LRRC39	-0.00330659	0.456419	0.456419	0.636009
944	DBT	0.0852155	0.0701786	0.0701786	0.226123
945	RTCA-AS1	0.183186	0.0238511	0.0238511	0.121283
946	RTCA	0.00378971	0.925296	0.925296	0.958179
947	CDC14A	-0.077495	0.115891	0.115891	0.302022
948	VCAM1	-0.00157198	0.364622	0.364622	0.572879
949	EXTL2	0.00836104	0.767947	0.767947	0.861793
950	AC104506.1	-0.0375379	0.0024404	0.0024404	0.0311534
951	SLC30A7	-0.108074	0.0634075	0.0634075	0.212196
952	DPH5	-0.025723	0.00561171	0.00561171	0.0591347
953	AC093157.2	-0.000610567	0.394367	0.394367	0.594478
954	AC093157.1	0.130398	0.0372419	0.0372419	0.156115
955	AL109741.1	-0.00137886	0.062457	0.062457	0.210698
956	S1PR1	-0.0122308	0.132225	0.132225	0.326705
957	RNPC3	-0.000560217	0.993821	0.993821	0.996547
958	AMY2B	-0.00351279	0.904868	0.904868	0.946876
959	AMY1B	0.000525547	0.0349448	0.0349448	0.149968
960	PRMT6	0.0304228	0.438897	0.438897	0.624388
961	VAV3	-0.115028	0.0114022	0.0114022	0.0820809
962	VAV3-AS1	-0.0133439	0.0816675	0.0816675	0.247141
963	AL390036.1	-0.00820147	0.764091	0.764091	0.859026
964	SLC25A24	0.0459097	0.304453	0.304453	0.523548
965	AL359258.2	-0.00571028	0.298536	0.298536	0.518952
966	FAM102B	0.0326491	0.505415	0.505415	0.67266
967	HENMT1	-0.0209181	0.022177	0.022177	0.115605
968	PRPF38B	-0.0752415	0.198059	0.198059	0.412147
969	FNDC7	0.0235818	0.387054	0.387054	0.588929
970	STXBP3	-0.112113	0.0925658	0.0925658	0.266332
971	AKNAD1	-0.00364883	0.412978	0.412978	0.606015
972	AL449266.1	-0.00986506	0.131273	0.131273	0.325808
973	GPSM2	-0.00510541	0.275221	0.275221	0.496401
974	CLCC1	-0.0238331	0.00789292	0.00789292	0.0760396
975	WDR47	-0.0491098	0.345203	0.345203	0.556946
976	TAF13	0.0759816	0.359542	0.359542	0.569067
977	AL356488.3	-0.0577774	0.0801783	0.0801783	0.244438
978	TMEM167B	-0.0684841	0.354488	0.354488	0.565019
979	AL356488.2	-0.0168318	0.0315824	0.0315824	0.141899
980	C1orf194	0.0171061	0.399029	0.399029	0.597022
981	KIAA1324	-0.0213369	0.48826	0.48826	0.659725
982	SARS	0.0470232	0.271976	0.271976	0.493417
983	CELSR2	-0.000294152	0.772359	0.772359	0.86458
984	PSRC1	-0.00111525	0.438641	0.438641	0.6242
985	MYBPHL	0.00097318	0.00852162	0.00852162	0.0769177
986	SORT1	0.071703	0.240107	0.240107	0.458722
987	PSMA5	0.173978	0.00174039	0.00174039	0.0239838
988	SYPL2	0.00116904	0.0250046	0.0250046	0.124203
989	ATXN7L2	-0.0171007	0.0297507	0.0297507	0.136849
990	CYB561D1	-0.0409573	0.0114448	0.0114448	0.0821815
991	AMIGO1	-0.00381227	0.388206	0.388206	0.589937
992	GPR61	-0.000452588	0.0130326	0.0130326	0.0874608
993	GNAI3	0.110798	0.19233	0.19233	0.40627
994	GNAT2	0.00122543	0.0568237	0.0568237	0.199947
995	AMPD2	-0.262503	2.53798e-05	2.53798e-05	0.000697111
996	GSTM4	-0.00356899	0.903308	0.903308	0.945736
997	GSTM2	0.0551913	0.249423	0.249423	0.468902
998	GSTM1	0.0585717	0.176688	0.176688	0.387014
999	AC000032.1	0.0233733	0.391493	0.391493	0.592723
1000	GSTM5	0.000555333	0.27016	0.27016	0.491436
1001	GSTM3	0.010006	0.804719	0.804719	0.885684
1002	EPS8L3	-0.000657947	0.013014	0.013014	0.0874608
1003	AL450468.1	-0.0078255	0.211204	0.211204	0.42618
1004	AL450468.2	-0.100803	0.176273	0.176273	0.386747
1005	CSF1	-0.30499	0.000854301	0.000854301	0.0135249
1006	AHCYL1	-0.00527345	0.934644	0.934644	0.963739
1007	STRIP1	-0.0343688	0.465132	0.465132	0.642043
1008	AL160006.1	0.018452	0.643405	0.643405	0.773055
1009	LINC02586	0.000990953	0.0328074	0.0328074	0.144984
1010	KCNC4	-0.00736144	0.239908	0.239908	0.45845
1011	RBM15-AS1	0.0189199	0.495699	0.495699	0.664966
1012	RBM15	0.0818299	0.224849	0.224849	0.442177
1013	SLC16A4	-0.00897474	0.15071	0.15071	0.353539
1014	AL355488.1	-0.012069	0.0637574	0.0637574	0.212977
1015	LAMTOR5	0.122487	0.0451482	0.0451482	0.174745
1016	KCNA2	-0.00386139	0.381848	0.381848	0.586057
1017	AL365361.1	0.0112954	0.737391	0.737391	0.840475
1018	KCNA3	0.00359475	0.898569	0.898569	0.942861
1019	CD53	0.276198	0.00176324	0.00176324	0.0241826
1020	AL360270.1	-0.0404991	0.00227754	0.00227754	0.0295875
1021	LRIF1	0.237492	0.0129994	0.0129994	0.0874608
1022	AL360270.3	0.0566203	0.216547	0.216547	0.432106
1023	DRAM2	0.0108075	0.806112	0.806112	0.886652
1024	CEPT1	-0.0033952	0.946651	0.946651	0.971368
1025	AL355816.2	0.0511534	0.362418	0.362418	0.571377
1026	DENND2D	-0.102846	0.0999906	0.0999906	0.277773
1027	CHI3L2	-0.0184638	0.661425	0.661425	0.786807
1028	PIFO	-0.0109924	0.0453943	0.0453943	0.175302
1029	OVGP1	4.43003e-05	0.824616	0.824616	0.898338
1030	WDR77	-0.00345318	0.897831	0.897831	0.942456
1031	ATP5PB	0.124205	0.0163441	0.0163441	0.0981234
1032	C1orf162	0.0957489	0.0917584	0.0917584	0.265033
1033	TMIGD3	0.0908745	0.0433118	0.0433118	0.170818
1034	ADORA3	-0.00345354	0.441861	0.441861	0.625903
1035	RAP1A	0.108888	0.182645	0.182645	0.39385
1036	LINC01160	-0.00416084	0.346976	0.346976	0.558685
1037	INKA2	-0.0142294	0.779373	0.779373	0.869336
1038	DDX20	0.0243339	0.525538	0.525538	0.687473
1039	KCND3	-0.000291763	0.060797	0.060797	0.207706
1040	CTTNBP2NL	-0.0684506	7.57792e-07	7.57792e-07	3.07643e-05
1041	WNT2B	-0.0166896	0.0338437	0.0338437	0.147154
1042	ST7L	-0.0545144	0.181327	0.181327	0.3923
1043	CAPZA1	0.0692255	0.395286	0.395286	0.59516
1044	MOV10	-0.00742206	0.85262	0.85262	0.916187
1045	AL603832.1	0.000211727	0.677131	0.677131	0.798662
1046	RHOC	0.0656468	0.103135	0.103135	0.282627
1047	PPM1J	-0.00310794	0.487209	0.487209	0.659211
1048	AL603832.2	-0.00253526	0.0291944	0.0291944	0.135281
1049	AL390729.1	0.00192397	0.00891885	0.00891885	0.0769594
1050	SLC16A1	-0.0556155	5.64663e-05	5.64663e-05	0.00141737
1051	SLC16A1-AS1	0.0276041	0.415078	0.415078	0.607038
1052	AL357055.3	-0.0124	0.0562142	0.0562142	0.198846
1053	LRIG2	0.0039195	0.922554	0.922554	0.95662
1054	MAGI3	-0.01027	0.0723053	0.0723053	0.229954
1055	PHTF1	0.169731	0.0499969	0.0499969	0.185297
1056	RSBN1	0.00459776	0.930811	0.930811	0.961266
1057	AL137856.1	0.00119781	0.0532219	0.0532219	0.192435
1058	PTPN22	-0.0254866	0.396574	0.396574	0.596018
1059	AP4B1-AS1	0.000849137	0.0138292	0.0138292	0.0896645
1060	BCL2L15	-0.0117663	0.125805	0.125805	0.317929
1061	AP4B1	0.00532766	0.894447	0.894447	0.94072
1062	DCLRE1B	0.0216075	0.544875	0.544875	0.70262
1063	HIPK1-AS1	-0.0727969	0.00366947	0.00366947	0.0427949
1064	HIPK1	-0.120438	0.0475743	0.0475743	0.179965
1065	OLFML3	-0.00210968	0.595511	0.595511	0.740375
1066	SYT6	-0.000558257	0.252542	0.252542	0.472161
1067	TRIM33	0.301032	0.00538342	0.00538342	0.0573603
1068	BCAS2	0.125089	0.0950881	0.0950881	0.270034
1069	DENND2C	-0.0220418	0.0106519	0.0106519	0.0802412
1070	AMPD1	-0.00474484	0.282134	0.282134	0.503037
1071	NRAS	-4.19584e-05	0.999389	0.999389	0.999737
1072	CSDE1	-0.00383106	0.950497	0.950497	0.973977
1073	SIKE1	0.110705	0.0795539	0.0795539	0.244014
1074	TSPAN2	0.0122453	0.806549	0.806549	0.886821
1075	LINC01765	-0.00846218	0.176559	0.176559	0.386877
1076	VANGL1	-0.0100874	0.129277	0.129277	0.323076
1077	SLC22A15	0.176226	0.0392816	0.0392816	0.161367
1078	MAB21L3	0.0416141	0.280932	0.280932	0.501904
1079	ATP1A1	-0.0781266	0.131355	0.131355	0.325931
1080	LINC01762	0.0174491	0.52788	0.52788	0.689059
1081	AL390066.1	-0.0405559	0.345841	0.345841	0.557751
1082	CD58	-0.0223743	0.77176	0.77176	0.864322
1083	IGSF3	-0.000184975	0.690701	0.690701	0.809631
1084	CD2	0.00888854	0.597123	0.597123	0.741645
1085	PTGFRN	-0.00964521	0.10925	0.10925	0.291634
1086	CD101	-0.00356038	0.284994	0.284994	0.505793
1087	AL445231.1	-0.00104495	0.241216	0.241216	0.459996
1088	TTF2	-0.0382619	0.0753238	0.0753238	0.236391
1089	TRIM45	0.0417872	0.277627	0.277627	0.498567
1090	VTCN1	0.000302528	0.444252	0.444252	0.627257
1091	AL358072.1	0.000154927	0.279276	0.279276	0.500367
1092	MAN1A2	0.0241327	0.739208	0.739208	0.841735
1093	AL157902.1	0.00147459	0.0141808	0.0141808	0.0908405
1094	TENT5C	0.0425418	0.27986	0.27986	0.501029
1095	GDAP2	0.00227458	0.971155	0.971155	0.985092
1096	WDR3	0.00800214	0.775575	0.775575	0.86651
1097	SPAG17	-9.34618e-05	0.840836	0.840836	0.908428
1098	WARS2	-0.0268905	0.373802	0.373802	0.580298
1099	AL359915.2	-0.021172	0.00516026	0.00516026	0.0555741
1100	ZNF697	-0.0816652	0.000641943	0.000641943	0.0107468
1101	PHGDH	-0.00637884	0.659788	0.659788	0.785742
1102	NOTCH2	-0.282607	0.000101601	0.000101601	0.00233462
1103	SEC22B	-0.193385	0.033908	0.033908	0.147302
1104	NBPF26	-0.208272	0.0125354	0.0125354	0.0861956
1105	PPIAL4A	-6.58129e-05	0.54333	0.54333	0.701438
1106	LINC00623	-0.00472389	0.92207	0.92207	0.956548
1107	FCGR1B	0.539802	3.14697e-06	3.14697e-06	0.000112186
1108	AC244453.3	0.00874484	0.757797	0.757797	0.854386
1109	AC244453.2	-0.0137934	0.0695673	0.0695673	0.22473
1110	FAM72B	-0.0073395	0.0841499	0.0841499	0.251661
1111	SRGAP2C	0.0658692	0.266226	0.266226	0.487438
1112	SRGAP2-AS1	-0.00282554	0.0605482	0.0605482	0.207488
1113	AC244021.1	-0.0153978	0.0266002	0.0266002	0.128193
1114	AL592494.1	0.000612327	0.039815	0.039815	0.162669
1115	AC239800.2	0.000535244	0.0965	0.0965	0.272022
1116	AC239800.3	0.0155371	0.57666	0.57666	0.726007
1117	AC239798.2	0.0302442	0.400494	0.400494	0.597955
1118	HIST2H3PS2	0.0272562	0.310762	0.310762	0.528785
1119	FAM72C	0.0254909	0.343488	0.343488	0.555515
1120	AC245595.1	-0.0100122	0.11789	0.11789	0.304743
1121	PPIAL4E	0.0264534	0.325133	0.325133	0.540534
1122	AC246785.3	0.114015	0.0614542	0.0614542	0.208963
1123	NBPF15	-0.0279076	0.73804	0.73804	0.84069
1124	FP700111.1	-0.0135605	0.0534256	0.0534256	0.192954
1125	SRGAP2B	0.00551984	0.905955	0.905955	0.94752
1126	FAM72D	-0.00112354	0.214687	0.214687	0.430207
1127	AC245014.3	-0.0684081	0.00656347	0.00656347	0.0666659
1128	AC245014.1	-0.0126448	0.0509421	0.0509421	0.18741
1129	NBPF20	-0.043	0.319541	0.319541	0.536019
1130	GPR89A	0.042177	0.35812	0.35812	0.567539
1131	PDZK1	0.0013895	0.0624445	0.0624445	0.210691
1132	CD160	-0.00453792	0.304001	0.304001	0.523182
1133	RNF115	-0.02306	0.515218	0.515218	0.679659
1134	POLR3C	-0.0195616	0.532593	0.532593	0.692557
1135	NUDT17	-0.00800002	0.108786	0.108786	0.290936
1136	PIAS3	-0.0537095	0.00173787	0.00173787	0.0239655
1137	ANKRD35	0.000363496	0.0120816	0.0120816	0.0845209
1138	ITGA10	0.00173188	0.0277569	0.0277569	0.131344
1139	PEX11B	-0.0128811	0.526685	0.526685	0.688391
1140	RBM8A	0.212658	0.000873862	0.000873862	0.0137137
1141	LIX1L-AS1	0.0347252	0.374385	0.374385	0.580682
1142	LIX1L	-0.0103839	0.696578	0.696578	0.813168
1143	ANKRD34A	0.0203665	0.455643	0.455643	0.635646
1144	AC243547.2	0.00100328	0.0102386	0.0102386	0.0789083
1145	POLR3GL	-0.0364543	0.256691	0.256691	0.477087
1146	TXNIP	-0.124955	0.134742	0.134742	0.330282
1147	NBPF10	0.0121064	0.897055	0.897055	0.942083
1148	AC239799.1	-0.0043551	0.323447	0.323447	0.539197
1149	NOTCH2NL	-0.443166	2.0801e-13	2.0801e-13	2.46014e-11
1150	AC239799.2	-0.0097545	0.122195	0.122195	0.312017
1151	AC243756.1	-0.0150278	0.0509299	0.0509299	0.18741
1152	NBPF12	-0.0344585	0.646871	0.646871	0.775967
1153	PRKAB2	-0.0227971	0.00430113	0.00430113	0.0482243
1154	AC242426.2	-0.00423752	0.141127	0.141127	0.338874
1155	FMO5	-0.00815658	0.157207	0.157207	0.361979
1156	CHD1L	-0.0283147	0.0118107	0.0118107	0.0837489
1157	LINC00624	0.000326484	0.67329	0.67329	0.79607
1158	BCL9	-0.0220388	0.0271578	0.0271578	0.129761
1159	ACP6	-0.289998	9.56204e-05	9.56204e-05	0.00222774
1160	GPR89B	-0.0243677	0.00605782	0.00605782	0.06288
1161	NBPF11	-8.24979e-07	0.999983	0.999983	0.999983
1162	AC239809.3	0.0220189	0.419551	0.419551	0.609854
1163	PPIAL4G	-0.135776	1.55657e-08	1.55657e-08	8.6216e-07
1164	NBPF14	-0.305641	1.3907e-05	1.3907e-05	0.000411197
1165	NUDT4B	-0.00224629	0.0588162	0.0588162	0.204199
1166	PDE4DIP	-0.158997	0.00203135	0.00203135	0.0271377
1167	AC239804.1	4.70104e-05	0.935515	0.935515	0.964341
1168	NBPF9	-0.114108	0.120774	0.120774	0.309572
1169	AC245297.3	0.0940963	0.295027	0.295027	0.515989
1170	AC245297.2	-0.00563516	0.211716	0.211716	0.426657
1171	NBPF19	-0.165604	0.0611479	0.0611479	0.208274
1172	PPIAL4C	-0.00425201	0.334932	0.334932	0.548471
1173	FCGR1A	0.878786	1.3034e-16	1.3034e-16	2.23985e-14
1174	HIST2H2BF	-0.209084	3.35306e-05	3.35306e-05	0.000895308
1175	AC243772.2	-0.0290597	0.00754981	0.00754981	0.0739029
1176	HIST2H3D	-0.0189738	0.0210727	0.0210727	0.111998
1177	HIST2H4A	-0.00596326	0.195905	0.195905	0.410102
1178	HIST2H2AA3	-0.0954937	0.246141	0.246141	0.465124
1179	AC239868.3	-0.025673	0.0176815	0.0176815	0.101514
1180	HIST2H2AA4	0.437572	3.2022e-06	3.2022e-06	0.000113551
1181	HIST2H3A	-0.00396866	0.0342504	0.0342504	0.148062
1182	HIST2H4B	0.0213328	0.434571	0.434571	0.620976
1183	AC239868.2	-0.00767055	0.221511	0.221511	0.438256
1184	HIST2H2BE	-0.179413	0.0181782	0.0181782	0.103101
1185	HIST2H2AC	-0.10866	0.0242597	0.0242597	0.122278
1186	HIST2H2AB	0.0141646	0.725779	0.725779	0.832099
1187	BOLA1	0.00134721	0.943024	0.943024	0.969051
1188	SV2A	-0.0120797	0.0605804	0.0605804	0.207488
1189	SF3B4	0.152081	0.0144831	0.0144831	0.0920158
1190	MTMR11	0.027523	0.410139	0.410139	0.6039
1191	OTUD7B	0.00254408	0.897252	0.897252	0.942154
1192	VPS45	-0.0144905	0.201211	0.201211	0.415271
1193	PLEKHO1	-0.0421871	0.247764	0.247764	0.467121
1194	ANP32E	-0.0380896	0.422998	0.422998	0.612516
1195	APH1A	-0.0208056	0.649504	0.649504	0.777919
1196	C1orf54	-0.0411449	0.134951	0.134951	0.330304
1197	CIART	-0.0122887	0.768848	0.768848	0.862348
1198	MRPS21	0.133349	0.00241524	0.00241524	0.0308911
1199	PRPF3	-0.0949113	0.0707606	0.0707606	0.227149
1200	RPRD2	0.0553893	0.366131	0.366131	0.574036
1201	TARS2	-0.0102073	0.724959	0.724959	0.831588
1202	ECM1	-0.00837764	0.298168	0.298168	0.518721
1203	FALEC	0.0012067	0.0124328	0.0124328	0.0859014
1204	AL356356.1	-0.0882038	0.0119715	0.0119715	0.0842231
1205	ADAMTSL4	-0.0881531	0.0763031	0.0763031	0.238148
1206	MCL1	-0.568657	3.32954e-14	3.32954e-14	4.4042e-12
1207	ENSA	-0.00951971	0.86097	0.86097	0.921374
1208	GOLPH3L	-0.0129514	0.0948829	0.0948829	0.269718
1209	HORMAD1	0.048525	0.205392	0.205392	0.419675
1210	CTSS	0.253111	0.000489217	0.000489217	0.0086056
1211	CTSK	0.0221955	0.532447	0.532447	0.692414
1212	ARNT	-0.0798941	0.158015	0.158015	0.362939
1213	SETDB1	0.0585694	0.356812	0.356812	0.566722
1214	CERS2	0.0612231	0.350257	0.350257	0.561047
1215	AL590133.1	-0.00199363	0.0487859	0.0487859	0.182593
1216	ANXA9	-0.00313304	0.480538	0.480538	0.654276
1217	MINDY1	0.188139	0.0962521	0.0962521	0.271763
1218	PRUNE1	0.0372037	0.46304	0.46304	0.640779
1219	BNIPL	0.0265169	0.325315	0.325315	0.540534
1220	C1orf56	-0.0199528	0.512001	0.512001	0.677254
1221	CDC42SE1	-0.224613	0.00674665	0.00674665	0.067892
1222	MLLT11	-0.341792	7.24484e-09	7.24484e-09	4.19783e-07
1223	GABPB2	-0.00962295	0.740889	0.740889	0.842694
1224	SEMA6C	-0.00584725	0.19267	0.19267	0.406585
1225	TNFAIP8L2	0.0290026	0.550921	0.550921	0.706745
1226	SCNM1	0.129935	0.0449285	0.0449285	0.174289
1227	LYSMD1	0.0370227	0.341848	0.341848	0.553933
1228	VPS72	0.0300844	0.541114	0.541114	0.699929
1229	PIP5K1A	-0.0388433	0.511297	0.511297	0.67677
1230	PSMD4	0.148809	0.0378996	0.0378996	0.157733
1231	AL391069.2	0.0578736	0.498658	0.498658	0.667427
1232	ZNF687	-0.125571	0.0686751	0.0686751	0.222707
1233	PI4KB	-0.0341958	0.560226	0.560226	0.713357
1234	RFX5	-0.105064	2.65512e-06	2.65512e-06	9.6014e-05
1235	AL391069.1	0.00180314	0.103924	0.103924	0.2838
1236	AL391069.3	0.017925	0.715298	0.715298	0.825828
1237	SELENBP1	-0.001759	0.0181482	0.0181482	0.103018
1238	PSMB4	0.111524	0.0782111	0.0782111	0.241665
1239	POGZ	-0.184116	0.000954952	0.000954952	0.0147186
1240	CGN	-0.000261768	0.059157	0.059157	0.204721
1241	TUFT1	-0.0509229	0.240997	0.240997	0.459855
1242	SNX27	-0.0968898	0.222807	0.222807	0.439448
1243	AL391335.1	0.0101116	0.721265	0.721265	0.829335
1244	RIIAD1	-0.00521009	0.241231	0.241231	0.459996
1245	AL589765.7	0.0244149	0.364766	0.364766	0.572879
1246	MRPL9	0.0458214	0.192613	0.192613	0.40658
1247	OAZ3	0.00604651	0.783397	0.783397	0.872003
1248	AL589765.4	0.023262	0.39306	0.39306	0.593402
1249	TDRKH	0.0260047	0.337488	0.337488	0.550537
1250	TDRKH-AS1	0.000832888	0.0901344	0.0901344	0.262492
1251	RORC	-0.000995446	0.16233	0.16233	0.368677
1252	C2CD4D	-0.000915568	0.03385	0.03385	0.147154
1253	THEM4	0.00385159	0.881242	0.881242	0.93308
1254	S100A10	0.302232	4.61457e-08	4.61457e-08	2.35484e-06
1255	S100A11	1.39689	3.34247e-84	1e-30	3.36018e-80
1256	TCHH	-0.0112913	0.0984106	0.0984106	0.274883
1257	CRCT1	0.000603888	0.15585	0.15585	0.359993
1258	SPRR1A	0.00171396	0.00916865	0.00916865	0.0769594
1259	SPRR3	-0.00554495	0.0288461	0.0288461	0.134254
1260	SPRR1B	-0.00392227	0.376848	0.376848	0.582481
1261	SPRR2D	-0.00851476	0.173423	0.173423	0.382943
1262	SPRR2A	-0.00759266	0.226466	0.226466	0.443715
1263	SPRR2E	-0.000483646	0.0269584	0.0269584	0.1293
1264	SPRR2F	-0.000991016	0.0397708	0.0397708	0.162585
1265	LOR	-0.00345601	0.0914416	0.0914416	0.264422
1266	PGLYRP4	0.000882888	0.013866	0.013866	0.0898385
1267	S100A9	0.15869	0.0174031	0.0174031	0.100925
1268	S100A12	0.99208	5.028e-21	5.028e-21	1.23284e-18
1269	S100A8	0.976935	1.48619e-45	1e-30	1.86758e-42
1270	S100A7	0.00168512	0.0586779	0.0586779	0.203797
1271	BX470102.1	0.000475829	0.0366415	0.0366415	0.154447
1272	S100A6	1.20636	8.00291e-62	1e-30	2.29866e-58
1273	S100A5	0.000403248	0.0379727	0.0379727	0.157907
1274	S100A4	0.971536	1.62817e-34	1e-30	9.92e-32
1275	S100A3	-0.0126849	0.100901	0.100901	0.278843
1276	S100A2	-0.0081692	0.60232	0.60232	0.745108
1277	S100A16	-0.00205715	0.398155	0.398155	0.596896
1278	S100A14	0.0129671	0.44505	0.44505	0.627864
1279	S100A13	0.0445525	0.126651	0.126651	0.319223
1280	S100A1	-0.000310148	0.172583	0.172583	0.381691
1281	AL162258.2	-0.0434851	0.000504507	0.000504507	0.00884158
1282	CHTOP	0.121741	0.0811458	0.0811458	0.246155
1283	SNAPIN	0.0822018	0.0770759	0.0770759	0.239927
1284	ILF2	0.0184018	0.622564	0.622564	0.758852
1285	NPR1	-0.00873484	0.0715572	0.0715572	0.228806
1286	INTS3	-0.0442754	0.219389	0.219389	0.435486
1287	SLC27A3	0.0621033	0.254446	0.254446	0.474353
1288	GATAD2B	-0.044865	0.547874	0.547874	0.70468
1289	AL358472.5	0.0104297	0.796537	0.796537	0.880341
1290	DENND4B	-0.170392	0.0119026	0.0119026	0.0840285
1291	CRTC2	-0.210206	0.00359117	0.00359117	0.0420525
1292	SLC39A1	-0.0719307	0.204682	0.204682	0.418905
1293	AL358472.4	-0.0232736	0.0112226	0.0112226	0.0816359
1294	AL358472.3	-0.00580756	0.196489	0.196489	0.410595
1295	CREB3L4	0.0161313	0.509001	0.509001	0.675198
1296	JTB	0.0221555	0.640953	0.640953	0.771169
1297	AL358472.2	-0.00567222	0.212592	0.212592	0.427823
1298	RAB13	0.0691961	0.0591037	0.0591037	0.204639
1299	RPS27	-0.038885	0.51019	0.51019	0.676151
1300	NUP210L	-0.00418774	0.342476	0.342476	0.554547
1301	TPM3	-0.118755	0.107214	0.107214	0.288486
1302	C1orf189	-0.0145123	0.0595149	0.0595149	0.205497
1303	C1orf43	-0.0223936	0.781125	0.781125	0.870726
1304	UBAP2L	-0.0786981	0.331099	0.331099	0.544902
1305	HAX1	0.0392282	0.493039	0.493039	0.662857
1306	ATP8B2	0.0202441	0.459904	0.459904	0.638637
1307	IL6R-AS1	-0.00316539	0.913652	0.913652	0.951758
1308	IL6R	-0.194454	0.0180417	0.0180417	0.102819
1309	SHE	0.000977031	0.00882957	0.00882957	0.0769182
1310	AL162591.2	0.0194136	0.482503	0.482503	0.655885
1311	UBE2Q1	0.0910826	0.258003	0.258003	0.478543
1312	ADAR	-0.0367933	0.647014	0.647014	0.776047
1313	KCNN3	-0.00836705	0.185615	0.185615	0.397604
1314	PMVK	-0.0175419	0.528763	0.528763	0.689807
1315	AL451085.1	-0.0125083	0.102553	0.102553	0.281713
1316	PBXIP1	-0.0437488	0.412489	0.412489	0.605542
1317	PYGO2	0.00861309	0.622843	0.622843	0.759055
1318	AL451085.2	-0.00355827	0.0361917	0.0361917	0.153296
1319	SHC1	0.0937543	0.194022	0.194022	0.408269
1320	CKS1B	0.0203666	0.48997	0.48997	0.660764
1321	FLAD1	0.0117943	0.768475	0.768475	0.862075
1322	ZBTB7B	-0.134579	0.023746	0.023746	0.12095
1323	DCST1	-0.00116969	0.00892629	0.00892629	0.0769594
1324	DCST1-AS1	-0.00523047	0.0240672	0.0240672	0.121765
1325	ADAM15	-0.0394199	0.122746	0.122746	0.312871
1326	EFNA4	-0.0121503	0.117172	0.117172	0.303715
1327	EFNA3	0.000802877	0.0139005	0.0139005	0.0898385
1328	EFNA1	-0.000186644	0.376253	0.376253	0.582008
1329	SLC50A1	-0.0271556	0.496232	0.496232	0.665371
1330	DPM3	0.0176151	0.680969	0.680969	0.801595
1331	KRTCAP2	0.11771	0.0111469	0.0111469	0.0813946
1332	TRIM46	-0.00336263	0.136267	0.136267	0.332136
1333	MUC1	0.0352716	0.247326	0.247326	0.466573
1334	AC234582.1	-0.00458256	0.149735	0.149735	0.352073
1335	THBS3	-0.025006	0.584697	0.584697	0.732111
1336	MTX1	0.0274895	0.686384	0.686384	0.806383
1337	AC234582.2	0.0125752	0.653881	0.653881	0.781023
1338	GBA	0.194207	0.0219972	0.0219972	0.115083
1339	FAM189B	0.0217718	0.580189	0.580189	0.728579
1340	SCAMP3	-0.0017093	0.954326	0.954326	0.97647
1341	CLK2	-0.0292568	0.489252	0.489252	0.660328
1342	HCN3	-0.00821866	0.198645	0.198645	0.412727
1343	FDPS	0.0102583	0.783477	0.783477	0.872044
1344	RUSC1-AS1	-0.00900349	0.148055	0.148055	0.349677
1345	RUSC1	0.0186849	0.631155	0.631155	0.764365
1346	ASH1L	-0.085737	0.225358	0.225358	0.442671
1347	ASH1L-AS1	0.0909241	0.201105	0.201105	0.415136
1348	AL353807.2	-0.00149521	0.0148769	0.0148769	0.0934151
1349	MSTO1	0.0798558	0.103963	0.103963	0.2838
1350	YY1AP1	-0.311856	4.50286e-10	4.50286e-10	3.1991e-08
1351	DAP3	-0.00136302	0.974188	0.974188	0.986792
1352	GON4L	-0.149986	0.0127546	0.0127546	0.0868007
1353	SYT11	-0.0065778	0.833441	0.833441	0.903771
1354	RIT1	0.0418412	0.648377	0.648377	0.777032
1355	KHDC4	-0.104387	0.0719488	0.0719488	0.229219
1356	ARHGEF2	-0.411156	3.94448e-11	3.94448e-11	3.25032e-09
1357	AL355388.2	0.0504466	0.293886	0.293886	0.514836
1358	AL355388.1	0.000852989	0.322972	0.322972	0.538838
1359	SSR2	0.105037	0.108833	0.108833	0.291022
1360	UBQLN4	-0.0597887	0.0746494	0.0746494	0.234809
1361	LAMTOR2	0.0989591	0.0430319	0.0430319	0.170014
1362	RAB25	-0.000717447	0.609035	0.609035	0.749516
1363	MEX3A	0.000102362	0.182402	0.182402	0.393494
1364	LMNA	-0.105704	0.000112622	0.000112622	0.00254711
1365	SEMA4A	-0.164556	0.0157161	0.0157161	0.0964051
1366	SLC25A44	-0.0630727	0.338723	0.338723	0.551273
1367	PMF1-BGLAP	-0.0113789	0.131159	0.131159	0.325688
1368	PMF1	0.0632512	0.301478	0.301478	0.52142
1369	BGLAP	-0.00592118	0.193411	0.193411	0.407494
1370	PAQR6	-0.000345881	0.99044	0.99044	0.994608
1371	SMG5	-0.0393357	0.473254	0.473254	0.648929
1372	TMEM79	0.0584912	0.177004	0.177004	0.387378
1373	GLMP	0.24767	0.000568827	0.000568827	0.00966766
1374	CCT3	0.00618761	0.851115	0.851115	0.915156
1375	TSACC	0.0283336	0.292667	0.292667	0.513559
1376	C1orf61	0.00924881	0.921175	0.921175	0.956163
1377	AL139412.1	-0.0080985	0.195153	0.195153	0.409198
1378	MEF2D	-0.319449	8.29665e-08	8.29665e-08	3.99833e-06
1379	IQGAP3	-0.00413789	0.368162	0.368162	0.575738
1380	TTC24	0.00139553	0.269122	0.269122	0.490354
1381	NAXE	0.0105486	0.662101	0.662101	0.787041
1382	GPATCH4	0.00764246	0.817813	0.817813	0.894541
1383	BCAN	-0.00379954	0.390214	0.390214	0.591678
1384	AL590666.2	0.000116669	0.678645	0.678645	0.799627
1385	NES	0.00150817	0.149272	0.149272	0.351559
1386	CRABP2	-0.0217648	0.0277803	0.0277803	0.131393
1387	ISG20L2	-0.0664042	0.364683	0.364683	0.572879
1388	RRNAD1	0.0602173	0.45618	0.45618	0.635925
1389	MRPL24	0.0254744	0.401424	0.401424	0.598597
1390	HDGF	-0.136507	0.0164214	0.0164214	0.0984011
1391	PRCC	-0.0471472	0.322374	0.322374	0.538299
1392	SH2D2A	0.00795579	0.640433	0.640433	0.770681
1393	NTRK1	-0.00192198	0.207314	0.207314	0.421632
1394	LRRC71	-0.00511467	0.250683	0.250683	0.470039
1395	ARHGEF11	-0.0455047	0.414183	0.414183	0.606459
1396	ETV3L	0.0212713	0.413282	0.413282	0.606202
1397	ETV3	-0.0368233	0.483552	0.483552	0.656336
1398	FCRL5	0.0241405	0.371293	0.371293	0.578063
1399	FCRL4	0.0270625	0.315331	0.315331	0.532554
1400	FCRL3	-0.00291419	0.0778801	0.0778801	0.241161
1401	FCRL2	-0.00148258	0.260375	0.260375	0.481168
1402	FCRL1	-0.0116223	0.0689924	0.0689924	0.223483
1403	CD5L	0.00105442	0.336013	0.336013	0.549348
1404	CD1D	-0.0258481	0.0139309	0.0139309	0.0899468
1405	AL138899.1	-0.00312498	0.482195	0.482195	0.655688
1406	CD1A	-0.00173211	0.439579	0.439579	0.62458
1407	CD1C	0.0140752	0.609911	0.609911	0.74984
1408	CD1B	-0.00993639	0.127579	0.127579	0.320498
1409	CD1E	-0.00292846	0.416425	0.416425	0.607977
1410	SPTA1	-0.00375788	0.394886	0.394886	0.594858
1411	OR6N1	4.07868e-05	0.952647	0.952647	0.975428
1412	MNDA	0.345455	0.0013444	0.0013444	0.0196015
1413	PYHIN1	-0.0145917	0.0719425	0.0719425	0.229219
1414	IFI16	0.26475	0.00326218	0.00326218	0.0389717
1415	AIM2	0.112301	0.167637	0.167637	0.375434
1416	FCER1A	-0.00435646	0.29138	0.29138	0.512329
1417	OR10J1	-6.42503e-05	0.553033	0.553033	0.70819
1418	DUSP23	0.0691389	0.14136	0.14136	0.339163
1419	FCRL6	-0.00443873	0.315011	0.315011	0.532292
1420	SLAMF8	0.0806364	0.0384413	0.0384413	0.158902
1421	AL590560.1	0.00865092	0.759568	0.759568	0.855328
1422	VSIG8	-0.0303853	0.00921735	0.00921735	0.076976
1423	AL590560.2	0.000397324	0.503227	0.503227	0.671437
1424	CFAP45	0.0174531	0.70113	0.70113	0.816361
1425	TAGLN2	0.0464921	0.553531	0.553531	0.708511
1426	IGSF9	-0.0138877	0.0601956	0.0601956	0.206923
1427	SLAMF9	0.087431	0.0360155	0.0360155	0.152931
1428	LINC01133	-0.0079525	0.204183	0.204183	0.418361
1429	KCNJ10	-0.00350081	0.430081	0.430081	0.617349
1430	PIGM	0.00269479	0.925758	0.925758	0.958559
1431	IGSF8	-0.0138856	0.353534	0.353534	0.564194
1432	ATP1A4	-0.00460919	0.309686	0.309686	0.52821
1433	CASQ1	0.000553835	0.188195	0.188195	0.400874
1434	AL121987.2	-0.0277312	0.0081778	0.0081778	0.0769177
1435	PEA15	-0.0173582	0.643943	0.643943	0.773517
1436	DCAF8	0.00576782	0.927239	0.927239	0.95945
1437	AL139011.2	-0.00304677	0.492542	0.492542	0.662601
1438	AL139011.1	0.0187185	0.575796	0.575796	0.725335
1439	PEX19	-0.0160496	0.68111	0.68111	0.801639
1440	COPA	-0.120963	0.0375957	0.0375957	0.156968
1441	NCSTN	-0.108615	0.0721426	0.0721426	0.229509
1442	NHLH1	-0.0454684	0.000671186	0.000671186	0.0111344
1443	VANGL2	-0.00466743	0.290635	0.290635	0.511377
1444	SLAMF6	0.00601819	0.878658	0.878658	0.931964
1445	CD84	-0.107064	0.00294411	0.00294411	0.0361381
1446	SLAMF1	0.0139316	0.817109	0.817109	0.894133
1447	AL121985.1	-0.0679999	0.393871	0.393871	0.594176
1448	CD48	-0.123375	0.115488	0.115488	0.301441
1449	SLAMF7	-0.105119	0.180556	0.180556	0.391445
1450	LY9	-0.0060639	0.881943	0.881943	0.933298
1451	CD244	0.0671701	0.397896	0.397896	0.596754
1452	ITLN1	0.0242571	0.374491	0.374491	0.580712
1453	F11R	-0.00484716	0.945687	0.945687	0.970696
1454	AL591806.3	-0.000319196	0.245731	0.245731	0.464867
1455	TSTD1	0.181262	0.00205278	0.00205278	0.0273332
1456	USF1	-0.140979	0.000531967	0.000531967	0.00920458
1457	ARHGAP30	-0.304136	9.41008e-06	9.41008e-06	0.000292425
1458	NECTIN4	-0.00835413	0.138315	0.138315	0.335258
1459	AL591806.1	-0.00292326	0.51887	0.51887	0.682525
1460	KLHDC9	-0.00467001	0.293907	0.293907	0.514836
1461	PFDN2	0.268889	2.67293e-05	2.67293e-05	0.000728352
1462	NIT1	0.174275	0.0201293	0.0201293	0.109044
1463	DEDD	0.0317913	0.642977	0.642977	0.772726
1464	UFC1	0.177845	0.000180647	0.000180647	0.00382728
1465	AL590714.1	0.0489318	0.201431	0.201431	0.415421
1466	USP21	-0.00145188	0.92986	0.92986	0.960679
1467	PPOX	-0.00300943	0.503614	0.503614	0.671626
1468	B4GALT3	-0.0145478	0.694116	0.694116	0.811676
1469	ADAMTS4	0.0259231	0.335941	0.335941	0.549348
1470	NDUFS2	0.0780038	0.106616	0.106616	0.287774
1471	FCER1G	0.756037	8.96985e-40	1e-30	7.51449e-37
1472	APOA2	-0.0227358	0.0166501	0.0166501	0.099073
1473	TOMM40L	-0.235192	0.010827	0.010827	0.0806731
1474	NR1I3	0.0142139	0.61169	0.61169	0.750956
1475	PCP4L1	-0.000487463	0.0906075	0.0906075	0.263202
1476	MPZ	-0.0201692	0.72903	0.72903	0.834209
1477	SDHC	0.035995	0.423032	0.423032	0.612518
1478	CFAP126	0.00105173	0.33556	0.33556	0.549009
1479	AL592295.4	-0.149414	5.85658e-09	5.85658e-09	3.44305e-07
1480	AL831711.1	0.00174599	0.0646906	0.0646906	0.214455
1481	FCGR2A	-0.0570318	0.502428	0.502428	0.670786
1482	HSPA6	-0.11177	0.013727	0.013727	0.0893132
1483	FCGR3A	0.554994	1.26502e-09	1.26502e-09	8.45002e-08
1484	FCGR3B	0.558595	1.7948e-05	1.7948e-05	0.00051186
1485	FCGR2B	0.0668071	0.267581	0.267581	0.488699
1486	AL451067.1	-0.0038375	0.386736	0.386736	0.588765
1487	FCRLA	-0.00730692	0.16287	0.16287	0.36956
1488	FCRLB	0.031838	0.433968	0.433968	0.62058
1489	DUSP12	0.0552708	0.160504	0.160504	0.366167
1490	AL359541.1	0.0103434	0.711496	0.711496	0.823117
1491	ATF6	0.0279505	0.666356	0.666356	0.790335
1492	OLFML2B	-0.0257792	0.168494	0.168494	0.376375
1493	AL590408.1	-0.00274054	0.543118	0.543118	0.70139
1494	NOS1AP	-0.00474639	0.28356	0.28356	0.504357
1495	C1orf226	-0.00433836	0.327292	0.327292	0.541928
1496	SH2D1B	-0.00296933	0.50605	0.50605	0.673143
1497	UHMK1	0.0900908	0.0915968	0.0915968	0.264738
1498	AL596325.1	-0.00979423	0.118748	0.118748	0.306174
1499	UAP1	-0.0596399	1.15375e-05	1.15375e-05	0.000350943
1500	DDR2	-0.0131622	0.0499225	0.0499225	0.185075
1501	HSD17B7	-0.00944974	0.758788	0.758788	0.854976
1502	CCDC190	-3.6858e-05	0.958977	0.958977	0.979089
1503	RGS4	0.000852139	0.0466034	0.0466034	0.1778
1504	RGS5	0.000685074	0.028242	0.028242	0.132808
1505	RGS5-1	-0.00656212	0.137182	0.137182	0.333436
1506	NUF2	-0.00238546	0.626909	0.626909	0.761425
1507	PBX1	-7.58981e-05	0.798784	0.798784	0.881517
1508	AL356441.1	-0.0055848	0.849415	0.849415	0.914014
1509	MGST3	0.161378	2.51668e-05	2.51668e-05	0.000693155
1510	ALDH9A1	0.0526324	0.273949	0.273949	0.49528
1511	TMCO1	0.247875	0.000213361	0.000213361	0.00439608
1512	AL451074.2	-0.0114954	0.03888	0.03888	0.160189
1513	UCK2	-0.0045203	0.621783	0.621783	0.758361
1514	AL358115.1	4.30742e-05	0.943872	0.943872	0.969625
1515	LINC01675	-0.00477201	0.28021	0.28021	0.501439
1516	POGK	-0.0350038	0.415254	0.415254	0.607163
1517	TADA1	-0.000359288	0.827617	0.827617	0.900317
1518	ILDR2	0.000485587	0.523409	0.523409	0.686162
1519	GPA33	4.09467e-06	0.996426	0.996426	0.998128
1520	LINC01363	6.412e-05	0.79104	0.79104	0.876676
1521	AL451050.2	-0.00292048	0.0609798	0.0609798	0.207948
1522	POU2F1	-0.104062	0.139984	0.139984	0.33768
1523	CD247	-0.00755959	0.747423	0.747423	0.847012
1524	AL359962.2	-0.00535766	0.0279471	0.0279471	0.131926
1525	CREG1	0.173716	0.00225051	0.00225051	0.0293252
1526	AL031733.2	-0.00336023	0.448924	0.448924	0.630928
1527	RCSD1	0.068763	0.221666	0.221666	0.438404
1528	MPZL1	0.120926	0.0424144	0.0424144	0.16851
1529	ADCY10	0.000673228	0.146344	0.146344	0.346858
1530	Z99943.1	-0.00311049	0.07384	0.07384	0.232992
1531	MPC2	0.00142556	0.964486	0.964486	0.981748
1532	DCAF6	0.0030704	0.930747	0.930747	0.961249
1533	GPR161	-0.0189876	0.0290488	0.0290488	0.134783
1534	TIPRL	-0.00461963	0.922673	0.922673	0.956694
1535	SFT2D2	-0.0509581	0.222803	0.222803	0.439448
1536	TBX19	-0.00264728	0.928248	0.928248	0.959701
1537	XCL2	-0.0036117	0.24579	0.24579	0.464867
1538	XCL1	-0.00451391	0.310352	0.310352	0.528583
1539	ATP1B1	-0.0171801	0.450252	0.450252	0.631779
1540	NME7	-0.0175334	0.590182	0.590182	0.736299
1541	BLZF1	-0.0384682	0.548902	0.548902	0.705461
1542	CCDC181	-0.000780919	0.00863321	0.00863321	0.0769177
1543	SLC19A2	-0.0639133	0.150667	0.150667	0.353479
1544	AL021068.1	-0.00888491	0.15586	0.15586	0.359993
1545	F5	-0.132469	0.0958246	0.0958246	0.27134
1546	SELP	0.000603221	0.312486	0.312486	0.530197
1547	C1orf112	0.0108507	0.702535	0.702535	0.817192
1548	SELL	0.602536	6.40876e-07	6.40876e-07	2.65732e-05
1549	METTL18	0.0407916	0.255749	0.255749	0.476031
1550	SCYL3	0.0109273	0.82529	0.82529	0.898759
1551	KIFAP3	0.00187713	0.913105	0.913105	0.951385
1552	AL354732.1	-0.00249628	0.0576279	0.0576279	0.201589
1553	GORAB	0.000404471	0.978686	0.978686	0.988336
1554	MROH9	-0.00478305	0.0317073	0.0317073	0.142174
1555	FMO3	-0.000989266	0.0110319	0.0110319	0.0810993
1556	FMO2	0.00253581	0.0175866	0.0175866	0.101201
1557	AL021026.1	0.00027123	0.0817817	0.0817817	0.247412
1558	FMO1	0.00085382	0.0283804	0.0283804	0.133157
1559	FMO4	-0.00574213	0.197725	0.197725	0.41188
1560	PRRC2C	-0.27572	4.38189e-05	4.38189e-05	0.00113575
1561	MYOCOS	0.000994241	0.0100004	0.0100004	0.0786428
1562	VAMP4	0.0635325	0.207079	0.207079	0.421417
1563	METTL13	0.00803693	0.802146	0.802146	0.883916
1564	DNM3	0.0548914	0.149372	0.149372	0.351672
1565	PIGC	0.144225	0.0295785	0.0295785	0.136494
1566	SUCO	-0.0179131	0.807503	0.807503	0.887453
1567	FASLG	-0.00529039	0.166647	0.166647	0.374484
1568	TNFSF18	-0.00511849	0.250591	0.250591	0.469911
1569	TNFSF4	-0.00160065	0.367749	0.367749	0.575361
1570	AL645568.1	-0.0323487	0.00577322	0.00577322	0.0605827
1571	PRDX6	0.092102	0.0564769	0.0564769	0.199461
1572	ANKRD45	-0.000205595	0.339745	0.339745	0.552305
1573	KLHL20	-0.0121465	0.700673	0.700673	0.816065
1574	CENPL	-0.0486107	0.000290566	0.000290566	0.00563367
1575	DARS2	0.00138811	0.961505	0.961505	0.980077
1576	GAS5-AS1	0.00194817	0.152677	0.152677	0.356117
1577	ZBTB37	-0.0324355	0.626657	0.626657	0.76135
1578	RC3H1	0.047911	0.541716	0.541716	0.700389
1579	AL121983.1	-0.0440009	0.170202	0.170202	0.378605
1580	AL121983.2	-0.00373247	0.400511	0.400511	0.597955
1581	RABGAP1L	0.0422924	0.365934	0.365934	0.573888
1582	GPR52	-0.00636746	0.154779	0.154779	0.358709
1583	Z99127.1	0.0209779	0.441525	0.441525	0.62569
1584	CACYBP	0.127711	0.00229485	0.00229485	0.0297487
1585	MRPS14	0.0839271	0.0690812	0.0690812	0.223691
1586	KIAA0040	0.165856	0.0755425	0.0755425	0.236877
1587	TNR	0.0186106	0.500602	0.500602	0.669134
1588	AL513329.1	0.0104307	0.712903	0.712903	0.824103
1589	COP1	0.0185137	0.786945	0.786945	0.874113
1590	AL590723.1	0.000458226	0.0165676	0.0165676	0.0987864
1591	AL359265.3	0.0127912	0.750025	0.750025	0.848759
1592	SEC16B	-0.000463881	0.115156	0.115156	0.301084
1593	RASAL2-AS1	-0.0112226	0.148824	0.148824	0.350751
1594	RASAL2	-0.0518839	0.132643	0.132643	0.327149
1595	CLEC20A	0.000291685	0.019972	0.019972	0.108558
1596	C1orf220	-0.00951361	0.0675574	0.0675574	0.220147
1597	AL137796.1	0.000720623	0.0134269	0.0134269	0.088599
1598	AL449106.1	-0.000851023	0.0613484	0.0613484	0.208745
1599	RALGPS2	-0.00191755	0.960889	0.960889	0.979854
1600	FAM20B	-0.0327584	0.0620555	0.0620555	0.210085
1601	TOR3A	-0.0130221	0.741332	0.741332	0.842939
1602	ABL2	-0.0671696	0.173246	0.173246	0.38261
1603	SOAT1	0.0393542	0.413478	0.413478	0.606202
1604	AXDND1	0.0171015	0.53644	0.53644	0.695759
1605	TOR1AIP2	-0.0715657	0.31092	0.31092	0.528785
1606	AL353708.3	-0.0635074	0.228643	0.228643	0.446189
1607	TOR1AIP1	-0.182941	0.0112688	0.0112688	0.0818237
1608	AL353708.1	-0.0110797	0.15027	0.15027	0.352917
1609	CEP350	-0.0337278	0.529133	0.529133	0.690059
1610	QSOX1	-0.138222	0.0277735	0.0277735	0.131391
1611	LHX4	-0.00511483	0.249485	0.249485	0.468963
1612	ACBD6	0.0247711	0.625665	0.625665	0.760972
1613	XPR1	-0.00192795	0.971722	0.971722	0.985297
1614	KIAA1614	0.000877065	0.455764	0.455764	0.635646
1615	AL162431.2	0.000696707	0.980861	0.980861	0.989586
1616	KIAA1614-AS1	0.0964604	0.0758635	0.0758635	0.237402
1617	STX6	-0.017204	0.812107	0.812107	0.890259
1618	MR1	0.1283	0.153351	0.153351	0.356861
1619	IER5	-0.251237	0.00119388	0.00119388	0.0177546
1620	LINC01732	-0.0025631	0.0767756	0.0767756	0.239177
1621	CACNA1E	0.0520023	0.410692	0.410692	0.604316
1622	LINC01344	-0.00257477	0.0144893	0.0144893	0.0920158
1623	GLUL	-0.0655988	0.384379	0.384379	0.587427
1624	RNASEL	0.0600294	0.406476	0.406476	0.60145
1625	RGS16	-0.0240674	0.0213315	0.0213315	0.112926
1626	LINC01686	-0.00759837	0.111939	0.111939	0.296099
1627	NPL	0.0346416	0.645306	0.645306	0.774598
1628	DHX9	-0.0962106	0.0161244	0.0161244	0.097557
1629	LAMC1	0.00260679	0.925967	0.925967	0.958677
1630	LAMC2	-0.00556911	0.208785	0.208785	0.423417
1631	NMNAT2	-0.0081145	0.194623	0.194623	0.408812
1632	SMG7	-0.215664	0.00102208	0.00102208	0.0155329
1633	NCF2	-0.112462	0.202671	0.202671	0.416708
1634	ARPC5	0.173012	0.0307189	0.0307189	0.139295
1635	RGL1	0.184734	0.011711	0.011711	0.0834299
1636	APOBEC4	-0.0010909	0.0132938	0.0132938	0.0880475
1637	COLGALT2	-0.0137141	0.0433376	0.0433376	0.170827
1638	TSEN15	0.0357651	0.347942	0.347942	0.559256
1639	AL445228.2	-0.00587625	0.192656	0.192656	0.406585
1640	C1orf21	-0.0413291	0.00595848	0.00595848	0.0621313
1641	EDEM3	0.0615947	0.42973	0.42973	0.617109
1642	FAM129A	-0.466113	1.90091e-07	1.90091e-07	8.53116e-06
1643	RNF2	-0.0108828	0.841018	0.841018	0.908478
1644	TRMT1L	0.0375682	0.561318	0.561318	0.714159
1645	SWT1	0.156631	0.117597	0.117597	0.304377
1646	IVNS1ABP	-0.905527	5.81956e-27	5.81956e-27	2.12742e-24
1647	AL078644.2	0.0638326	0.500702	0.500702	0.669223
1648	HMCN1	-0.0156992	0.0612858	0.0612858	0.208602
1649	TPR	-0.0668819	0.273097	0.273097	0.494262
1650	ODR4	0.0420735	0.51724	0.51724	0.681361
1651	OCLM	-0.00545194	0.238729	0.238729	0.457111
1652	PTGS2	-0.3716	8.57778e-08	8.57778e-08	4.10631e-06
1653	PACERR	-0.0488681	0.130653	0.130653	0.324892
1654	PLA2G4A	0.00497826	0.861197	0.861197	0.921415
1655	ERVMER61-1	0.00171416	0.0623228	0.0623228	0.210634
1656	RGS18	0.783676	1.90801e-06	1.90801e-06	7.13056e-05
1657	AL390957.1	0.0125049	0.655079	0.655079	0.78208
1658	AL136987.1	-0.0175427	0.0309083	0.0309083	0.13987
1659	RGS1	0.0169718	0.634266	0.634266	0.766471
1660	RGS13	-0.00410039	0.353224	0.353224	0.564003
1661	AL136454.1	-0.0242491	0.0257286	0.0257286	0.126109
1662	RGS2	-0.152517	0.0924461	0.0924461	0.26614
1663	UCHL5	0.0833452	0.100584	0.100584	0.278525
1664	TROVE2	-0.0646259	0.181493	0.181493	0.39246
1665	GLRX2	-0.00494517	0.884274	0.884274	0.934077
1666	CDC73	0.00638372	0.91428	0.91428	0.952272
1667	B3GALT2	-0.0210093	0.0126684	0.0126684	0.0866661
1668	LINC01031	0.000619841	0.382822	0.382822	0.586618
1669	CFH	-0.00532692	0.234254	0.234254	0.452268
1670	ASPM	0.0234346	0.388008	0.388008	0.589817
1671	ZBTB41	-0.0236312	0.161772	0.161772	0.367982
1672	DENND1B	-0.0584974	0.0901909	0.0901909	0.26253
1673	C1orf53	-0.000965081	0.756363	0.756363	0.8532
1674	NEK7	-0.129603	0.00245521	0.00245521	0.0312829
1675	ATP6V1G3	0.000277661	0.0130225	0.0130225	0.0874608
1676	PTPRC	-0.401595	3.56097e-07	3.56097e-07	1.54972e-05
1677	AL157402.2	0.0269787	0.669079	0.669079	0.792582
1678	MIR181A1HG	0.0956502	0.149945	0.149945	0.352283
1679	NR5A2	-0.000445693	0.303197	0.303197	0.5228
1680	LINC00862	0.00494743	0.863082	0.863082	0.922395
1681	AC104461.1	-0.00432114	0.327647	0.327647	0.542033
1682	ZNF281	-0.00201772	0.982404	0.982404	0.990483
1683	AL359834.1	0.000585553	0.0283167	0.0283167	0.133044
1684	KIF14	0.0556084	0.243591	0.243591	0.462695
1685	DDX59	0.198378	0.0250062	0.0250062	0.124203
1686	AL445483.1	-0.000744031	0.397288	0.397288	0.596547
1687	CAMSAP2	-0.0101146	0.784377	0.784377	0.872658
1688	GPR25	0.00426813	0.0226272	0.0226272	0.117223
1689	INAVA	-0.00259366	0.0220855	0.0220855	0.115278
1690	KIF21B	-0.0889787	0.0136622	0.0136622	0.0891592
1691	AL358473.1	-0.00554139	0.219731	0.219731	0.435864
1692	ASCL5	0.00053193	0.00862648	0.00862648	0.0769177
1693	TMEM9	-0.0169998	0.0774609	0.0774609	0.240496
1694	IGFN1	0.0222878	0.413993	0.413993	0.606459
1695	PKP1	-0.00189181	0.0185724	0.0185724	0.104265
1696	TNNT2	0.000746716	0.241986	0.241986	0.460907
1697	LAD1	0.022757	0.403076	0.403076	0.599256
1698	AC119427.1	0.00139342	0.0107036	0.0107036	0.0803009
1699	TNNI1	0.00039001	0.201461	0.201461	0.415421
1700	PHLDA3	-0.0115992	0.0749055	0.0749055	0.235467
1701	CSRP1	0.0380682	0.363588	0.363588	0.572459
1702	AC096677.1	0.0203779	0.455811	0.455811	0.635646
1703	NAV1	-0.00960455	0.823211	0.823211	0.897628
1704	IPO9-AS1	-0.0270539	0.0069932	0.0069932	0.0697101
1705	IPO9	-0.0167195	0.70551	0.70551	0.818853
1706	SHISA4	-0.0180979	0.0334901	0.0334901	0.146442
1707	TIMM17A	0.077748	0.132018	0.132018	0.32645
1708	RNPEP	0.0475277	0.28044	0.28044	0.501625
1709	AC099676.1	0.000289921	0.0957214	0.0957214	0.27118
1710	ELF3-AS1	-0.00151606	0.00846007	0.00846007	0.0769177
1711	ELF3	-0.00841619	0.00341425	0.00341425	0.0403813
1712	GPR37L1	0.000294106	0.191469	0.191469	0.404942
1713	ARL8A	-0.0796528	0.283003	0.283003	0.503812
1714	PTPN7	-0.152408	0.00689936	0.00689936	0.0689799
1715	UBE2T	0.0106556	0.209599	0.209599	0.424263
1716	PPP1R12B	0.00210937	0.97028	0.97028	0.984579
1717	SYT2	0.00216213	0.0775792	0.0775792	0.2406
1718	AC104463.2	0.0274743	0.306988	0.306988	0.525973
1719	KDM5B	0.00201095	0.976827	0.976827	0.987593
1720	AC098934.4	0.0489088	0.201701	0.201701	0.4156
1721	PCAT6	0.00953702	0.737272	0.737272	0.840388
1722	RABIF	0.125527	0.0600456	0.0600456	0.206687
1723	KLHL12	0.0435501	0.522847	0.522847	0.685649
1724	ADIPOR1	0.00103095	0.988372	0.988372	0.993573
1725	CYB5R1	-0.0297635	0.51828	0.51828	0.681959
1726	TMEM183A	0.0377799	0.476757	0.476757	0.651467
1727	PPFIA4	0.000859002	0.462755	0.462755	0.640554
1728	MYBPH	-0.0106563	0.167023	0.167023	0.374901
1729	CHI3L1	0.332809	2.67345e-05	2.67345e-05	0.000728352
1730	CHIT1	-0.0290934	0.421125	0.421125	0.610945
1731	LINC01353	-0.236987	8.02501e-05	8.02501e-05	0.00192084
1732	LINC01136	-0.12572	0.17982	0.17982	0.390988
1733	BTG2	-0.135209	0.136642	0.136642	0.332565
1734	ATP2B4	-0.0366799	0.477272	0.477272	0.652038
1735	LAX1	-0.0289034	0.0084229	0.0084229	0.0769177
1736	ZC3H11A	-0.130902	0.0823847	0.0823847	0.248395
1737	ZBED6	-0.024738	0.717236	0.717236	0.826638
1738	SNRPE	0.0758355	0.127942	0.127942	0.321189
1739	LINC00303	0.0260541	0.332685	0.332685	0.546128
1740	SOX13	-0.0373126	0.0020209	0.0020209	0.0270521
1741	ETNK2	-0.0149734	0.03267	0.03267	0.144652
1742	KISS1	0.00220907	0.0111701	0.0111701	0.0814237
1743	GOLT1A	-0.00343264	0.0172101	0.0172101	0.100618
1744	PLEKHA6	-0.0067828	0.209559	0.209559	0.424248
1745	LINC00628	-0.0221628	0.0248156	0.0248156	0.123689
1746	PPP1R15B	-0.506915	2.03546e-13	2.03546e-13	2.4216e-11
1747	PIK3C2B	-0.0156112	0.604901	0.604901	0.746739
1748	MDM4	-0.0535539	0.549217	0.549217	0.705595
1749	AL512306.3	-0.0146223	0.0562997	0.0562997	0.199044
1750	AL512306.2	-0.0434093	0.00141787	0.00141787	0.0204063
1751	NFASC	-0.00851947	0.172543	0.172543	0.381691
1752	CNTN2	0.000170193	0.152963	0.152963	0.356559
1753	TMEM81	-0.00959167	0.127058	0.127058	0.319727
1754	RBBP5	-0.0358535	0.676187	0.676187	0.798052
1755	DSTYK	0.0389541	0.438022	0.438022	0.623595
1756	TMCC2	-0.00199471	0.289797	0.289797	0.510439
1757	NUAK2	0.0145295	0.785588	0.785588	0.873474
1758	LEMD1	0		1
1759	CDK18	-0.0489339	0.000235213	0.000235213	0.00471504
1760	MFSD4A	0.00106586	0.00861564	0.00861564	0.0769177
1761	ELK4	-0.00880168	0.817242	0.817242	0.894181
1762	SLC45A3	-0.0108181	0.1624	0.1624	0.3687
1763	NUCKS1	-0.0440466	0.0849319	0.0849319	0.253031
1764	RAB29	0.0511896	0.406459	0.406459	0.60145
1765	SLC41A1	-0.0068492	0.703346	0.703346	0.817615
1766	PM20D1	0.000522072	0.0450937	0.0450937	0.174659
1767	SLC26A9	0.00133388	0.0787194	0.0787194	0.242453
1768	RAB7B	-0.0427599	0.0464248	0.0464248	0.177468
1769	CTSE	-0.00421641	0.339357	0.339357	0.551981
1770	RHEX	0.000200513	0.140455	0.140455	0.338203
1771	FAM72A	0.00450931	0.873758	0.873758	0.929142
1772	SRGAP2	-0.067254	0.0579727	0.0579727	0.202291
1773	IKBKE	-0.0498318	0.178196	0.178196	0.388844
1774	C1orf147	0.00110049	0.029885	0.029885	0.137218
1775	AC244034.2	0.000339217	0.341204	0.341204	0.55329
1776	RASSF5	-0.221107	0.011944	0.011944	0.0842231
1777	EIF2D	0.0315972	0.465211	0.465211	0.64206
1778	AL591846.2	-0.00982019	0.741646	0.741646	0.843174
1779	DYRK3	-0.0418742	0.000690796	0.000690796	0.0113659
1780	MAPKAPK2	-0.222277	0.00210777	0.00210777	0.0279175
1781	IL10	0.0677049	0.121656	0.121656	0.311199
1782	IL19	-0.0117775	0.0361749	0.0361749	0.153284
1783	IL20	-0.00345638	0.442102	0.442102	0.626023
1784	IL24	0.0223763	0.411745	0.411745	0.605166
1785	FCMR	0.0128597	0.617177	0.617177	0.754778
1786	PIGR	-0.00900632	0.00446126	0.00446126	0.0495844
1787	FCAMR	0.0247109	0.358683	0.358683	0.568073
1788	C1orf116	-0.00729365	0.115375	0.115375	0.301382
1789	PFKFB2	-0.0624294	0.351717	0.351717	0.562669
1790	YOD1	-0.0275629	0.591776	0.591776	0.737584
1791	C4BPB	0.00121139	0.0503697	0.0503697	0.186259
1792	C4BPA	0.00101048	0.0171485	0.0171485	0.100492
1793	CD55	-0.18005	0.0274485	0.0274485	0.130468
1794	CR2	-0.000119459	0.771924	0.771924	0.864352
1795	CR1	-0.281665	0.00540432	0.00540432	0.0575221
1796	AL137789.1	-0.00360102	0.415193	0.415193	0.607118
1797	CR1L	-0.0126512	0.100809	0.100809	0.278684
1798	CD46	0.125758	0.0953747	0.0953747	0.270619
1799	MIR29B2CHG	-0.432058	3.89925e-09	3.89925e-09	2.3614e-07
1800	PLXNA2	-0.00473812	0.871468	0.871468	0.927714
1801	CAMK1G	-0.112652	0.00204217	0.00204217	0.027246
1802	LAMB3	-0.404402	1.13106e-13	1.13106e-13	1.42132e-11
1803	AL031316.1	-0.060484	0.604709	0.604709	0.746548
1804	G0S2	-0.838567	2.13963e-26	2.13963e-26	7.29143e-24
1805	HSD11B1	-0.0329503	0.380472	0.380472	0.584978
1806	TRAF3IP3	-0.174953	0.0119707	0.0119707	0.0842231
1807	C1orf74	0.0206357	0.477704	0.477704	0.652317
1808	IRF6	-0.000149528	0.0605146	0.0605146	0.207457
1809	UTP25	0.00371757	0.926392	0.926392	0.95882
1810	SERTAD4-AS1	-0.00082234	0.0156135	0.0156135	0.0960605
1811	SERTAD4	0.00090235	0.0170476	0.0170476	0.100198
1812	HHAT	-0.00505582	0.265185	0.265185	0.486148
1813	RCOR3	0.0875639	0.140404	0.140404	0.33814
1814	TRAF5	0.00929235	0.838812	0.838812	0.907234
1815	LINC00467	0.00506806	0.924405	0.924405	0.957828
1816	SLC30A1	0.0221367	0.731395	0.731395	0.836058
1817	NEK2	-0.000187225	0.820008	0.820008	0.895745
1818	AC096637.2	-0.000419071	0.374954	0.374954	0.581092
1819	LPGAT1	-0.0415576	0.580507	0.580507	0.728796
1820	INTS7	-0.0123951	0.0824063	0.0824063	0.248395
1821	DTL	-0.00580339	0.224916	0.224916	0.442265
1822	AL451060.1	0.00187314	0.0936809	0.0936809	0.267963
1823	PPP2R5A	0.0712133	0.277904	0.277904	0.498799
1824	AL360091.3	-0.00499026	0.25836	0.25836	0.478896
1825	TMEM206	0.0127715	0.73818	0.73818	0.840802
1826	NENF	0.0446646	0.12603	0.12603	0.318058
1827	LINC01740	-0.00440021	0.322775	0.322775	0.5387
1828	AC092803.2	0.0784032	0.358626	0.358626	0.568026
1829	ATF3	0.0440772	0.361117	0.361117	0.5704
1830	FAM71A	0.00805777	0.776688	0.776688	0.867367
1831	AL590648.3	0.018054	0.513505	0.513505	0.678576
1832	BATF3	-0.244549	5.26978e-06	5.26978e-06	0.000174554
1833	NSL1	0.00388787	0.907305	0.907305	0.948334
1834	TATDN3	0.0175215	0.672371	0.672371	0.795238
1835	FLVCR1-DT	-0.0215993	0.0296988	0.0296988	0.136767
1836	FLVCR1	-5.66548e-05	0.998649	0.998649	0.999146
1837	VASH2	0.000599507	0.0797861	0.0797861	0.244334
1838	ANGEL2	0.0329957	0.486013	0.486013	0.658475
1839	RPS6KC1	0.0393455	0.473447	0.473447	0.649099
1840	PROX1	0.00138646	0.072479	0.072479	0.230355
1841	SMYD2	0.0219103	0.416734	0.416734	0.607997
1842	PTPN14	-0.00528495	0.234277	0.234277	0.452269
1843	CENPF	-0.0124495	0.119906	0.119906	0.307975
1844	KCTD3	0.0241458	0.377309	0.377309	0.582899
1845	ESRRG	-0.000135643	0.232996	0.232996	0.45092
1846	GPATCH2	-0.0139511	0.732921	0.732921	0.837041
1847	SPATA17	-0.00209788	0.01044	0.01044	0.0797216
1848	RRP15	0.0559881	0.291164	0.291164	0.51204
1849	TGFB2-AS1	0.000445398	0.140922	0.140922	0.338849
1850	TGFB2	-0.00367559	0.406753	0.406753	0.601557
1851	C1orf143	-0.000909059	0.0219427	0.0219427	0.114891
1852	LYPLAL1	-0.020309	0.454447	0.454447	0.634698
1853	AC096642.1	-0.00474852	0.282562	0.282562	0.503483
1854	ZC3H11B	0.000852259	0.983447	0.983447	0.991038
1855	EPRS	0.0756367	0.0998713	0.0998713	0.277541
1856	BPNT1	-0.00639644	0.266803	0.266803	0.488048
1857	IARS2	0.0381663	0.316366	0.316366	0.533137
1858	RAB3GAP2	-0.129766	0.00240852	0.00240852	0.0308443
1859	MARK1	-0.00416132	0.0286919	0.0286919	0.133829
1860	C1orf115	-0.00371207	0.40541	0.40541	0.600986
1861	2021-03-02	0.00100558	0.0200995	0.0200995	0.10899
1862	2021-03-01	-0.0770342	3.17169e-05	3.17169e-05	0.000849134
1863	HLX-AS1	-0.00446406	0.345356	0.345356	0.557147
1864	HLX	0.153945	0.0329755	0.0329755	0.145205
1865	DUSP10	-0.131769	0.00260537	0.00260537	0.0327807
1866	LINC01655	0.0280788	0.296428	0.296428	0.517292
1867	LINC02257	-0.00330904	0.46326	0.46326	0.640879
1868	LINC01705	-0.000295842	0.990954	0.990954	0.994814
1869	AL513314.2	-0.0591194	0.000207608	0.000207608	0.00431661
1870	TAF1A	0.022155	0.557056	0.557056	0.711247
1871	TAF1A-AS1	-0.00510342	0.253007	0.253007	0.472721
1872	MIA3	0.0814483	0.166469	0.166469	0.374304
1873	AL592148.3	-0.00410077	0.357771	0.357771	0.567253
1874	AIDA	-0.0600083	0.00666805	0.00666805	0.0673708
1875	BROX	-0.0179838	0.793606	0.793606	0.878406
1876	FAM177B	0.0499439	0.192481	0.192481	0.406451
1877	AL392172.1	-0.0287634	0.000217524	0.000217524	0.00444444
1878	DISP1	-0.00961115	0.108574	0.108574	0.290563
1879	TLR5	0.134838	0.170868	0.170868	0.379527
1880	SUSD4	0.00123486	0.0313051	0.0313051	0.141233
1881	CAPN8	-0.00870896	0.111262	0.111262	0.294988
1882	CAPN2	0.0454956	0.203191	0.203191	0.417271
1883	TP53BP2	0.124076	0.063449	0.063449	0.212264
1884	FBXO28	0.00785107	0.882098	0.882098	0.933298
1885	DEGS1	0.0754975	0.138453	0.138453	0.335492
1886	NVL	0.00958078	0.734872	0.734872	0.83846
1887	CNIH4	0.423652	6.11262e-08	6.11262e-08	3.03458e-06
1888	WDR26	-0.101037	0.190492	0.190492	0.40363
1889	CNIH3	-0.0133658	0.0719325	0.0719325	0.229219
1890	DNAH14	-0.00206074	0.649227	0.649227	0.777727
1891	LBR	0.0170805	0.823707	0.823707	0.897909
1892	ENAH	-0.0155648	0.0441832	0.0441832	0.172763
1893	SRP9	0.0692838	0.131861	0.131861	0.326302
1894	EPHX1	0.00336508	0.828015	0.828015	0.9005
1895	AL591895.1	-0.0252456	0.00930818	0.00930818	0.0769928
1896	TMEM63A	0.0130966	0.751744	0.751744	0.850042
1897	PYCR2	0.0881093	0.100089	0.100089	0.277878
1898	SDE2	-0.12157	0.112318	0.112318	0.29671
1899	AL512343.2	0.0228994	0.401018	0.401018	0.598402
1900	H3F3A	0.746444	3.60207e-29	3.60207e-29	1.57442e-26
1901	LINC01703	-0.0259688	0.0164573	0.0164573	0.0984548
1902	ACBD3	0.0398154	0.444132	0.444132	0.627186
1903	ACBD3-AS1	-0.00482479	0.253203	0.253203	0.472956
1904	LIN9	-0.00395273	0.425139	0.425139	0.613859
1905	PARP1	-0.00972074	0.605924	0.605924	0.747509
1906	STUM	-0.00793535	0.20487	0.20487	0.419036
1907	ITPKB	-0.070858	0.226463	0.226463	0.443715
1908	PSEN2	-0.0249857	0.010816	0.010816	0.0806638
1909	COQ8A	-0.0152608	0.630346	0.630346	0.763672
1910	CDC42BPA	-0.00399993	0.889139	0.889139	0.937197
1911	ZNF678	0.00639391	0.82053	0.82053	0.895957
1912	SNAP47	-0.00316064	0.833195	0.833195	0.90362
1913	JMJD4	-0.0136646	0.0580433	0.0580433	0.202396
1914	WNT9A	0.000359852	0.160195	0.160195	0.365844
1915	ARF1	0.0827978	0.275999	0.275999	0.496948
1916	C1orf35	-6.55684e-05	0.998285	0.998285	0.998981
1917	MRPL55	-0.0475234	0.0411589	0.0411589	0.165973
1918	GUK1	0.102037	0.0521613	0.0521613	0.190257
1919	GJC2	-0.00522863	0.238471	0.238471	0.456724
1920	IBA57-DT	0.0184567	0.503736	0.503736	0.671626
1921	IBA57	0.00928202	0.817455	0.817455	0.894348
1922	OBSCN-AS1	0.00113109	0.00856326	0.00856326	0.0769177
1923	OBSCN	-0.00666478	0.145861	0.145861	0.346203
1924	AL353593.1	0.00142013	0.031334	0.031334	0.141255
1925	AL353593.2	0.00149986	0.0386789	0.0386789	0.159655
1926	TRIM11	-0.0587423	0.0308765	0.0308765	0.139758
1927	AL670729.1	0.00111503	0.286971	0.286971	0.507787
1928	TRIM17	-0.00152262	0.0456565	0.0456565	0.175945
1929	HIST3H2A	0.0480149	0.189483	0.189483	0.402296
1930	HIST3H2BB	-0.000100599	0.894688	0.894688	0.940912
1931	RNF187	0.0116461	0.73376	0.73376	0.837761
1932	RHOU	0.116187	0.0561428	0.0561428	0.198664
1933	RAB4A	0.0321118	0.277298	0.277298	0.498328
1934	AL117350.1	-0.0017611	0.210304	0.210304	0.424993
1935	CCSAP	-0.0780755	0.0184114	0.0184114	0.103837
1936	ACTA1	0.00140603	0.00848331	0.00848331	0.0769177
1937	NUP133	-0.0443499	0.00021492	0.00021492	0.0044214
1938	AL121990.1	0.0132027	0.637336	0.637336	0.768657
1939	ABCB10	0.00359767	0.86888	0.86888	0.926389
1940	TAF5L	-0.00999682	0.683304	0.683304	0.803598
1941	URB2	-0.0182298	0.0156916	0.0156916	0.0963639
1942	LINC01736	0.0010563	0.0415614	0.0415614	0.16666
1943	GALNT2	0.0271558	0.618713	0.618713	0.755982
1944	AL136988.1	0.00149288	0.17122	0.17122	0.380057
1945	PGBD5	-0.00791621	0.100711	0.100711	0.278527
1946	COG2	0.0520355	0.210507	0.210507	0.425201
1947	AGT	-0.00450299	0.307362	0.307362	0.526317
1948	CAPN9	-0.000225507	0.0304561	0.0304561	0.138729
1949	C1orf198	-0.0243507	0.00651961	0.00651961	0.0663713
1950	TTC13	-0.0330988	0.00154219	0.00154219	0.0218361
1951	ARV1	-0.00681137	0.631479	0.631479	0.764641
1952	FAM89A	0.0295887	0.396679	0.396679	0.596085
1953	C1orf131	0.0644784	0.228372	0.228372	0.445791
1954	GNPAT	-0.0173532	0.5777	0.5777	0.72685
1955	EXOC8	-0.0454368	0.486725	0.486725	0.658907
1956	SPRTN	0.0116924	0.872415	0.872415	0.928526
1957	EGLN1	0.144187	0.128856	0.128856	0.322397
1958	AL445524.1	0.61454	6.63504e-08	6.63504e-08	3.26172e-06
1959	TSNAX	0.00726267	0.891727	0.891727	0.93894
1960	TSNAX-DISC1	-0.0119626	0.0630864	0.0630864	0.211728
1961	DISC1	-0.0148893	0.61915	0.61915	0.756249
1962	SIPA1L2	0.00162014	0.986971	0.986971	0.992946
1963	MAP10	0.00861097	0.758982	0.758982	0.855003
1964	NTPCR	0.0739631	0.157591	0.157591	0.362406
1965	PCNX2	0.0622143	0.188281	0.188281	0.401015
1966	MAP3K21	-0.0288247	0.00914075	0.00914075	0.0769594
1967	KCNK1	0.000464622	0.134766	0.134766	0.330282
1968	SLC35F3	-0.00350577	0.126498	0.126498	0.318879
1969	AL355472.4	-0.00697317	0.136586	0.136586	0.332519
1970	AL355472.1	0.0769833	0.271685	0.271685	0.493094
1971	COA6	0.0956252	0.19846	0.19846	0.41253
1972	TARBP1	-0.0341982	0.00170603	0.00170603	0.0236073
1973	LINC01354	-0.00765094	0.0996684	0.0996684	0.277169
1974	IRF2BP2	-0.21397	0.00392365	0.00392365	0.0451827
1975	AL160408.2	0.026511	0.50305	0.50305	0.671379
1976	AL160408.4	0.00078332	0.199063	0.199063	0.412953
1977	LINC01132	0.000309203	0.359487	0.359487	0.569032
1978	AL391832.1	0.00428068	0.881374	0.881374	0.933151
1979	AL391832.2	-0.0661445	0.430928	0.430928	0.617947
1980	AL391832.3	-0.333382	0.000147237	0.000147237	0.00323888
1981	LINC01348	0.00568645	0.842907	0.842907	0.909883
1982	TOMM20	0.129357	0.0309753	0.0309753	0.140078
1983	RBM34	0.10007	0.11897	0.11897	0.30646
1984	ARID4B	-0.189559	0.0152383	0.0152383	0.0947378
1985	GGPS1	-0.0113516	0.782595	0.782595	0.871584
1986	TBCE	-0.00687398	0.87585	0.87585	0.930307
1987	AL357556.4	0.000714762	0.0270139	0.0270139	0.129505
1988	TBCE-1	-0.000840667	0.976656	0.976656	0.98751
1989	B3GALNT2	0.0183915	0.610454	0.610454	0.750277
1990	GNG4	0.00165043	0.150499	0.150499	0.353291
1991	LYST	-0.23226	0.00300754	0.00300754	0.036715
1992	AL139161.2	0.000199848	0.626957	0.626957	0.761437
1993	NID1	-0.0167846	0.0608056	0.0608056	0.207706
1994	GPR137B	0.00258842	0.933716	0.933716	0.96298
1995	ERO1B	-0.0142551	0.848988	0.848988	0.91375
1996	EDARADD	-0.0134752	0.0649121	0.0649121	0.214941
1997	LGALS8	0.283174	0.000530406	0.000530406	0.00918549
1998	LGALS8-AS1	0.0482598	0.206612	0.206612	0.420978
[truncated: 18,111 more rows]

## Sheet: TCells_VAP_vsNOVAP_EarlyTime
	gene	log2FC	pval	Pval_clean	qval
0	FAM138A	0.0586666	0.151716	0.151716	0.320555
1	AL627309.1	0.00088007	0.161694	0.161694	0.334227
2	AL627309.2	-0.00536004	6.19211e-25	6.19211e-25	2.46532e-23
3	AL669831.5	-0.255695	4.56096e-06	4.56096e-06	2.9029e-05
4	FAM87B	-0.016206	0.371131	0.371131	0.570006
5	LINC00115	-0.085577	0.0733301	0.0733301	0.1907
6	FAM41C	-0.0568892	0.0336178	0.0336178	0.104212
7	NOC2L	-0.244664	0.0221206	0.0221206	0.0741757
8	KLHL17	-0.0207174	0.706487	0.706487	0.833352
9	PLEKHN1	0.027615	0.681729	0.681729	0.817848
10	AL645608.8	-0.00629517	3.52262e-17	3.52262e-17	3.95012e-16
11	HES4	0.122246	0.0503844	0.0503844	0.143
12	ISG15	0.122848	0.155818	0.155818	0.326171
13	AL645608.2	-0.00623938	0.864189	0.864189	0.927528
14	AGRN	0.123557	0.0556778	0.0556778	0.154495
15	AL645608.9	0.0100057	0.490371	0.490371	0.674054
16	RNF223	0.00442278	1.33656e-06	1.33656e-06	8.8924e-06
17	C1orf159	-0.0204931	0.7767	0.7767	0.875404
18	AL390719.2	-0.0113841	1.48734e-09	1.48734e-09	1.17457e-08
19	TTLL10	-0.0642179	0.00531078	0.00531078	0.0217871
20	TNFRSF18	-0.208836	0.191287	0.191287	0.375003
21	TNFRSF4	0.0165544	0.914015	0.914015	0.956597
22	SDF4	-0.0653443	0.476801	0.476801	0.66291
23	B3GALT6	0.0825966	0.136369	0.136369	0.296839
24	C1QTNF12	0.0229561	0.468982	0.468982	0.657122
25	AL162741.1	-0.0105476	0.410181	0.410181	0.607298
26	UBE2J2	0.357325	0.00178326	0.00178326	0.00819712
27	SCNN1D	-0.00599233	0.641984	0.641984	0.79077
28	ACAP3	-0.0267499	0.771211	0.771211	0.872051
29	PUSL1	0.0778622	0.401589	0.401589	0.598923
30	INTS11	-0.190529	0.0873405	0.0873405	0.216424
31	CPTP	-0.132679	0.14582	0.14582	0.31184
32	TAS1R3	-0.00798932	0.532396	0.532396	0.708288
33	DVL1	-0.0131859	0.806136	0.806136	0.893558
34	MXRA8	0.0334503	0.248009	0.248009	0.444269
35	AURKAIP1	0.0565117	0.505469	0.505469	0.686588
36	CCNL2	-0.361401	3.16867e-05	3.16867e-05	0.000187105
37	MRPL20	-0.0667164	0.451819	0.451819	0.643359
38	AL391244.3	0.00525228	1.71156e-15	1.71156e-15	1.76024e-14
39	ANKRD65	-0.00555761	8.34922e-25	8.34922e-25	3.01103e-23
40	AL391244.2	-0.00271598	6.79819e-10	6.79819e-10	5.48934e-09
41	LINC01770	0.0103745	2.02625e-24	2.02625e-24	5.68197e-23
42	VWA1	-0.00527324	1.89604e-24	1.89604e-24	5.38107e-23
43	ATAD3C	0.0412428	0.353014	0.353014	0.552738
44	ATAD3B	0.0281731	0.748321	0.748321	0.859118
45	ATAD3A	0.117118	0.160336	0.160336	0.332486
46	SSU72	0.0704071	0.442858	0.442858	0.636287
47	AL645728.1	-0.1022	0.0337755	0.0337755	0.104556
48	FNDC10	0.0314883	0.0124836	0.0124836	0.0457247
49	AL691432.2	0.030529	0.65451	0.65451	0.799586
50	MIB2	-0.0487719	0.710217	0.710217	0.835528
51	MMP23B	-0.0529739	0.0384017	0.0384017	0.115567
52	CDK11B	-0.100598	0.219392	0.219392	0.411175
53	FO704657.1	-0.0668522	0.0302183	0.0302183	0.0953199
54	SLC35E2B	-0.345938	0.00180849	0.00180849	0.00830169
55	CDK11A	-0.342225	7.53161e-05	7.53161e-05	0.000428496
56	SLC35E2A	-0.256612	0.00366483	0.00366483	0.0157226
57	NADK	0.0908274	0.0483882	0.0483882	0.13835
58	GNB1	0.177536	0.00922851	0.00922851	0.0353123
59	AL109917.1	-0.00711206	0.695751	0.695751	0.827445
60	TMEM52	-0.00531571	4.56337e-07	4.56337e-07	3.14539e-06
61	CFAP74	-0.00387258	5.68233e-18	5.68233e-18	6.65011e-17
62	PRKCZ	-0.118538	0.0872905	0.0872905	0.216327
63	AL590822.2	-0.0204689	0.111126	0.111126	0.256707
64	PRKCZ-AS1	-0.00389804	0.761094	0.761094	0.866438
65	FAAP20	0.00845497	0.928998	0.928998	0.96429
66	SKI	-0.0242889	0.822805	0.822805	0.904253
67	MORN1	-0.00158186	0.963363	0.963363	0.981722
68	RER1	0.188459	0.0264001	0.0264001	0.0853789
69	PEX10	-0.00276808	0.969372	0.969372	0.984708
70	PLCH2	-0.221394	0.0117684	0.0117684	0.0435356
71	PANK4	-0.176194	0.0421768	0.0421768	0.124542
72	AL139246.5	-0.0220566	0.610464	0.610464	0.768084
73	TNFRSF14-AS1	0.0635305	0.446596	0.446596	0.639139
74	TNFRSF14	-0.0795318	0.255941	0.255941	0.453548
75	AL139246.3	0.012897	0.768304	0.768304	0.870505
76	FAM213B	0.0170095	0.794503	0.794503	0.88605
77	MMEL1	-0.012303	0.260341	0.260341	0.458114
78	TTC34	-0.0103058	0.421144	0.421144	0.617551
79	PRDM16	-0.00429312	0.00694602	0.00694602	0.0274645
80	AL590438.1	0.00220039	5.98596e-13	5.98596e-13	5.58227e-12
81	ARHGEF16	-0.00762147	8.6822e-13	8.6822e-13	8.02594e-12
82	MEGF6	-0.105807	0.0392756	0.0392756	0.117616
83	AL513320.1	-0.00034768	0.978409	0.978409	0.988631
84	TPRG1L	-0.0220027	0.679479	0.679479	0.816544
85	WRAP73	-0.120672	0.27776	0.27776	0.476955
86	TP73	0.00649211	0.809022	0.809022	0.894872
87	SMIM1	-0.00338323	0.947734	0.947734	0.973741
88	LRRC47	-0.0645772	0.612767	0.612767	0.770067
89	CEP104	0.0679976	0.571228	0.571228	0.737833
90	DFFB	-0.165333	0.0160496	0.0160496	0.0567422
91	C1orf174	-0.0933752	0.39525	0.39525	0.592686
92	LINC01134	0.000244218	0.984856	0.984856	0.991758
93	LINC01345	-0.0100209	7.18531e-08	7.18531e-08	5.18922e-07
94	AL365255.1	-0.00675612	0.852873	0.852873	0.921524
95	NPHP4	-0.018051	0.780388	0.780388	0.877152
96	KCNAB2	-0.0940449	0.234994	0.234994	0.428473
97	RPL22	-0.0144105	0.861484	0.861484	0.92591
98	AL031847.1	0.0596378	0.145028	0.145028	0.310768
99	RNF207	-0.119743	0.0585653	0.0585653	0.160665
100	ICMT	0.185057	0.0619772	0.0619772	0.167804
101	LINC00337	-0.0344137	0.120477	0.120477	0.271677
102	GPR153	0.00975689	0.604214	0.604214	0.76332
103	ACOT7	0.0210369	0.871061	0.871061	0.931594
104	AL031848.2	0.000284583	0.993668	0.993668	0.996733
105	HES2	-0.0102892	0.354373	0.354373	0.554088
106	ESPN	-0.0415741	0.442926	0.442926	0.636287
107	TNFRSF25	-0.616739	0.000903418	0.000903418	0.00440984
108	PLEKHG5	-0.0213906	0.237403	0.237403	0.431614
109	NOL9	-0.00896027	0.938161	0.938161	0.968409
110	ZBTB48	-0.0473701	0.567356	0.567356	0.734957
111	KLHL21	-0.0103093	0.850758	0.850758	0.920236
112	PHF13	-0.0256268	0.743129	0.743129	0.855747
113	THAP3	-0.198278	0.0232457	0.0232457	0.0773548
114	DNAJC11	-0.157707	0.102169	0.102169	0.241757
115	CAMTA1-DT	-0.00762745	2.49512e-10	2.49512e-10	2.06024e-09
116	CAMTA1	0.210653	0.0224831	0.0224831	0.0752293
117	VAMP3	0.214435	0.000483956	0.000483956	0.00248352
118	PER3	0.0187183	0.69896	0.69896	0.828858
119	Z98884.1	0.0504243	0.140812	0.140812	0.304197
120	UTS2	0.974697	6.80722e-10	6.80722e-10	5.49442e-09
121	TNFRSF9	-0.0602213	0.39957	0.39957	0.597001
122	PARK7	0.152345	0.110906	0.110906	0.256454
123	AL034417.4	0.00563828	3.44126e-19	3.44126e-19	4.27892e-18
124	AL034417.3	0.00134269	0.0696454	0.0696454	0.183428
125	ERRFI1	-0.00444045	0.860003	0.860003	0.925032
126	AL034417.2	-0.00962475	1.40393e-09	1.40393e-09	1.11045e-08
127	SLC45A1	0.0159331	0.641168	0.641168	0.790074
128	RERE	0.0269395	0.795841	0.795841	0.886849
129	AL096855.1	-0.00759896	0.0100252	0.0100252	0.0379884
130	ENO1	0.230377	0.00752907	0.00752907	0.0295087
131	ENO1-AS1	-0.0244734	0.332758	0.332758	0.533902
132	SLC2A5	0.0823807	0.046241	0.046241	0.133696
133	GPR157	0.116361	0.0114567	0.0114567	0.0425548
134	MIR34AHG	0.0128964	0.710198	0.710198	0.835528
135	LINC01759	0.0105288	0.75421	0.75421	0.862776
136	H6PD	0.108933	0.0626287	0.0626287	0.169113
137	SPSB1	0.179058	0.0144405	0.0144405	0.0518002
138	SLC25A33	-0.0306027	0.62433	0.62433	0.77818
139	TMEM201	-0.0478045	0.238824	0.238824	0.43323
140	PIK3CD	-0.769682	2.02977e-08	2.02977e-08	1.52108e-07
141	PIK3CD-AS1	0.00962887	0.777851	0.777851	0.875879
142	PIK3CD-AS2	0.00869199	0.503485	0.503485	0.685381
143	CLSTN1	-0.101878	0.341614	0.341614	0.542347
144	CTNNBIP1	0.316083	0.00111767	0.00111767	0.00535299
145	LZIC	0.0263193	0.77231	0.77231	0.872706
146	NMNAT1	0.104429	0.0786541	0.0786541	0.200957
147	RBP7	0.0124491	0.020114	0.020114	0.068382
148	UBE4B	-0.117544	0.165387	0.165387	0.33966
149	KIF1B	0.1441	0.00862553	0.00862553	0.0332869
150	AL139424.3	-0.0105508	2.20022e-08	2.20022e-08	1.64391e-07
151	AL139424.2	0.00128119	0.903917	0.903917	0.95073
152	PGD	0.281402	3.69119e-05	3.69119e-05	0.00021713
153	AL139424.1	0.00167619	0.896324	0.896324	0.946208
154	CENPS-CORT	0.11271	0.230754	0.230754	0.423547
155	CENPS	0.00944944	0.913093	0.913093	0.956179
156	CORT	0.011523	2.67685e-24	2.67685e-24	7.13802e-23
157	DFFA	-0.0783032	0.382795	0.382795	0.580887
158	PEX14	-0.026023	0.776532	0.776532	0.875264
159	CASZ1	-0.101854	0.135204	0.135204	0.295031
160	AL139423.1	-0.0439594	0.0858742	0.0858742	0.213898
161	C1orf127	-0.0101064	0.431719	0.431719	0.627039
162	TARDBP	0.150983	0.106984	0.106984	0.249653
163	MASP2	-0.0137634	0.447821	0.447821	0.640026
164	AL109811.3	-0.0459289	0.109853	0.109853	0.254733
165	SRM	0.127441	0.150805	0.150805	0.319235
166	EXOSC10	-0.180217	0.116866	0.116866	0.266243
167	AL109811.1	-0.00442573	1.46789e-05	1.46789e-05	8.93801e-05
168	AL109811.2	0.012587	2.53568e-25	2.53568e-25	1.80876e-23
169	MTOR	-0.187842	0.0237847	0.0237847	0.0786152
170	UBIAD1	-0.300857	0.00524551	0.00524551	0.0215545
171	DISP3	0.0025399	0.843562	0.843562	0.916317
172	FBXO2	-0.261927	9.9711e-06	9.9711e-06	6.17428e-05
173	FBXO44	-0.46958	6.17407e-05	6.17407e-05	0.000354978
174	FBXO6	-0.0514966	0.438011	0.438011	0.632389
175	MAD2L2	-0.0806736	0.400758	0.400758	0.598147
176	DRAXIN	-0.0334001	0.603823	0.603823	0.762928
177	AGTRAP	0.104355	0.0907341	0.0907341	0.221907
178	C1orf167	-0.00110635	5.22434e-17	5.22434e-17	5.80014e-16
179	MTHFR	0.0438686	0.490596	0.490596	0.674226
180	CLCN6	-0.0534378	0.254024	0.254024	0.451583
181	NPPA-AS1	0.00989333	0.577659	0.577659	0.743157
182	NPPA	0.00156869	0.231398	0.231398	0.424346
183	KIAA2013	0.219112	0.0131636	0.0131636	0.0479122
184	PLOD1	0.0198224	0.764726	0.764726	0.868284
185	MFN2	-0.0525491	0.533698	0.533698	0.709269
186	MIIP	-0.069189	0.460181	0.460181	0.650066
187	TNFRSF8	-0.0356003	0.0279435	0.0279435	0.0895351
188	TNFRSF1B	-0.0279486	0.62036	0.62036	0.775633
189	VPS13D	-0.166039	0.0153323	0.0153323	0.0545901
190	DHRS3	0.0767085	0.40261	0.40261	0.599975
191	AC254633.1	-0.0166935	0.195866	0.195866	0.381487
192	C1orf158	6.88307e-05	0.506901	0.506901	0.687257
193	PDPN	0.051305	0.0358755	0.0358755	0.109456
194	PRDM2	-0.154474	0.101254	0.101254	0.240186
195	KAZN	0.0185602	0.523755	0.523755	0.701415
196	TMEM51-AS1	0.0208906	9.87762e-24	9.87762e-24	2.15167e-22
197	TMEM51	0.121778	0.00033077	0.00033077	0.0017346
198	FHAD1	-0.0365374	0.0526058	0.0526058	0.148074
199	AL031283.2	-0.0143826	0.260648	0.260648	0.458535
200	AL031283.1	0.00186671	0.948803	0.948803	0.974292
201	EFHD2	0.115838	0.0157548	0.0157548	0.0558277
202	CTRC	-0.0200465	0.170843	0.170843	0.347705
203	CELA2A	-0.00166016	0.0612226	0.0612226	0.166209
204	CELA2B	0.0188204	5.66144e-24	5.66144e-24	1.33602e-22
205	CASP9	0.119035	0.152674	0.152674	0.321776
206	DNAJC16	-0.023506	0.755718	0.755718	0.863567
207	AGMAT	-0.03793	0.683287	0.683287	0.818625
208	AL121992.1	-0.00178719	3.90946e-21	3.90946e-21	5.67944e-20
209	DDI2	-0.167987	0.0930045	0.0930045	0.225875
210	AL121992.2	0.0283116	0.373243	0.373243	0.572095
211	PLEKHM2	0.0785096	0.0147613	0.0147613	0.0527815
212	SLC25A34	0.0294404	0.0006414	0.0006414	0.00322319
213	FBLIM1	-0.0044067	0.8094	0.8094	0.894978
214	UQCRHL	-0.179779	3.69354e-05	3.69354e-05	0.000217177
215	AL450998.2	-0.178814	0.0165738	0.0165738	0.0582576
216	SPEN	0.131006	0.134574	0.134574	0.294231
217	ZBTB17	-0.0566788	0.523195	0.523195	0.701056
218	HSPB7	0.0154075	2.70371e-23	2.70371e-23	5.30867e-22
219	CLCNKB	-0.00859476	9.26371e-14	9.26371e-14	8.90751e-13
220	FAM131C	0.00778086	6.90279e-24	6.90279e-24	1.58978e-22
221	EPHA2	-0.0165786	0.189279	0.189279	0.372263
222	AL451042.2	-0.00892843	4.18539e-07	4.18539e-07	2.8928e-06
223	ARHGEF19	-0.00509164	0.954832	0.954832	0.977039
224	CPLANE2	-0.0185806	0.726535	0.726535	0.845795
225	FBXO42	-0.1802	0.0660406	0.0660406	0.176149
226	SZRD1	0.0143849	0.86238	0.86238	0.926396
227	SPATA21	-0.0490422	0.0552058	0.0552058	0.153572
228	NECAP2	0.0262117	0.792533	0.792533	0.885
229	LINC01772	0.00404278	0.900203	0.900203	0.948163
230	AL137802.2	-0.0275503	0.127708	0.127708	0.283253
231	NBPF1	-0.1037	0.0771615	0.0771615	0.198137
232	AL137798.2	0.00303407	3.52936e-12	3.52936e-12	3.17784e-11
233	CROCC	0.0647245	0.501172	0.501172	0.68325
234	BX284668.5	0.202087	0.00119182	0.00119182	0.00565827
235	BX284668.6	0.00486144	0.913519	0.913519	0.956326
236	MFAP2	0.00314651	0.000266976	0.000266976	0.00142043
237	ATP13A2	0.088749	0.211494	0.211494	0.401237
238	SDHB	-0.0474217	0.549894	0.549894	0.721965
239	PADI2	0.0128288	0.00413143	0.00413143	0.0175024
240	PADI1	-0.010298	0.00179486	0.00179486	0.00824481
241	PADI3	0.000766457	0.000726473	0.000726473	0.00361546
242	PADI4	-0.0351463	0.0111097	0.0111097	0.0415112
243	PADI6	0.0110088	2.72479e-25	2.72479e-25	1.80876e-23
244	RCC2	-0.0117302	0.876809	0.876809	0.934736
245	ARHGEF10L	0.168749	1.52528e-06	1.52528e-06	1.00912e-05
246	IGSF21	0.0264681	1.0491e-24	1.0491e-24	3.53896e-23
247	KLHDC7A	-0.00131742	7.8077e-07	7.8077e-07	5.2838e-06
248	ALDH4A1	0.146737	0.0175194	0.0175194	0.0611219
249	IFFO2	-0.134556	0.0697969	0.0697969	0.183668
250	UBR4	0.0126128	0.839947	0.839947	0.91461
251	AL035413.1	0.0766052	0.145519	0.145519	0.311388
252	EMC1	-0.0504972	0.59381	0.59381	0.755642
253	MRTO4	0.00697017	0.943873	0.943873	0.971708
254	AKR7A3	-0.0153839	0.230481	0.230481	0.423343
255	AKR7A2	0.279118	0.00115235	0.00115235	0.00549293
256	PQLC2	0.0588092	0.207272	0.207272	0.396631
257	CAPZB	0.104788	0.240433	0.240433	0.435273
258	MINOS1	0.328449	0.000233205	0.000233205	0.00125035
259	NBL1	-0.110495	0.340756	0.340756	0.541728
260	TMCO4	-0.0728195	0.466053	0.466053	0.654673
261	OTUD3	0.0735164	0.304801	0.304801	0.504345
262	PLA2G2D	0.00702816	4.11517e-05	4.11517e-05	0.000240872
263	Z98257.1	-0.00025655	0.868816	0.868816	0.930046
264	PLA2G2C	0.00436999	0.811606	0.811606	0.896601
265	UBXN10-AS1	-0.113205	0.145369	0.145369	0.311226
266	UBXN10	-0.00996064	0.729332	0.729332	0.847549
267	CAMK2N1	-0.133763	0.0393974	0.0393974	0.117872
268	MUL1	-0.0190868	0.815522	0.815522	0.89922
269	CDA	0.00535107	0.873055	0.873055	0.932713
270	PINK1	0.0650489	0.218232	0.218232	0.409767
271	PINK1-AS	-0.0465826	0.104854	0.104854	0.245998
272	DDOST	-0.191889	0.0582898	0.0582898	0.159996
273	KIF17	0.0209131	4.08252e-25	4.08252e-25	2.0368e-23
274	SH2D5	0.0185641	9.64946e-25	9.64946e-25	3.32212e-23
275	HP1BP3	-0.162663	0.151578	0.151578	0.320464
276	EIF4G3	0.0710133	0.373134	0.373134	0.572078
277	ECE1	-0.0161622	0.759292	0.759292	0.865438
278	AL031005.1	-0.00167467	8.16633e-09	8.16633e-09	6.22412e-08
279	AL031728.1	0.00982453	0.794562	0.794562	0.88605
280	NBPF3	-0.0569846	0.393711	0.393711	0.591405
281	ALPL	-0.129952	9.15812e-07	9.15812e-07	6.17275e-06
282	AL359815.1	-0.00436204	6.61716e-08	6.61716e-08	4.79267e-07
283	RAP1GAP	-0.00230068	1.93276e-08	1.93276e-08	1.45e-07
284	USP48	0.166915	0.262746	0.262746	0.460935
285	HSPG2	-0.0138161	1.35708e-08	1.35708e-08	1.02423e-07
286	LINC01635	0.00540716	0.874438	0.874438	0.933408
287	CDC42	-0.137961	0.0724517	0.0724517	0.188914
288	AL031281.2	0.0102634	0.746174	0.746174	0.857617
289	WNT4	-3.75298e-05	0.723516	0.723516	0.843936
290	ZBTB40	-0.200645	0.0135137	0.0135137	0.0489737
291	C1QA	0.264019	3.54223e-06	3.54223e-06	2.27697e-05
292	C1QC	0.217621	2.02787e-05	2.02787e-05	0.000121672
293	C1QB	0.312251	1.69108e-07	1.69108e-07	1.19763e-06
294	EPHB2	0.0716835	2.05717e-08	2.05717e-08	1.54104e-07
295	KDM1A	-0.0722569	0.338437	0.338437	0.539535
296	LUZP1	-0.436953	0.000379332	0.000379332	0.00197484
297	LINC01355	-0.031446	0.0831258	0.0831258	0.208916
298	HNRNPR	-0.126128	0.281502	0.281502	0.480668
299	ZNF436	-0.0532963	0.0603194	0.0603194	0.164467
300	ZNF436-AS1	-0.000612	0.985179	0.985179	0.991894
301	TCEA3	-0.0468696	0.0826546	0.0826546	0.208044
302	ASAP3	0.0058199	2.04027e-25	2.04027e-25	1.80876e-23
303	E2F2	-0.0736543	0.173284	0.173284	0.35153
304	ID3	-0.127333	0.0358737	0.0358737	0.109456
305	MDS2	-0.00519567	0.685164	0.685164	0.819897
306	RPL11	0.16654	0.0180303	0.0180303	0.0625677
307	ELOA	0.0832907	0.41974	0.41974	0.616097
308	ELOA-AS1	-0.106608	0.0952977	0.0952977	0.229853
309	PITHD1	-0.289511	0.00248524	0.00248524	0.0110807
310	LYPLA2	-0.0220656	0.818629	0.818629	0.901193
311	GALE	-0.0348311	0.528528	0.528528	0.704962
312	HMGCL	0.0277791	0.701233	0.701233	0.830232
313	FUCA1	0.11135	0.0896982	0.0896982	0.22039
314	CNR2	-0.0153498	0.230446	0.230446	0.423343
315	PNRC2	-0.095387	0.230201	0.230201	0.423109
316	SRSF10	-0.0535962	0.645098	0.645098	0.792812
317	MYOM3	-0.00989855	0.000574307	0.000574307	0.00290564
318	IL22RA1	-0.00602506	1.20076e-21	1.20076e-21	1.85998e-20
319	IFNLR1	-0.20364	0.00641784	0.00641784	0.0256128
320	GRHL3	0.0058696	3.87403e-22	3.87403e-22	6.3481e-21
321	STPG1	-0.0227658	0.725609	0.725609	0.845198
322	NIPAL3	-0.324073	0.015936	0.015936	0.0563902
323	RCAN3	0.310654	0.0618216	0.0618216	0.167429
324	AL445686.2	-0.233676	0.0111924	0.0111924	0.0417657
325	NCMAP	0.00654388	6.44718e-23	6.44718e-23	1.18057e-21
326	SRRM1	-0.44017	6.72624e-06	6.72624e-06	4.22354e-05
327	CLIC4	0.238159	5.28652e-06	5.28652e-06	3.34458e-05
328	RUNX3	-0.867315	9.52783e-10	9.52783e-10	7.63214e-09
329	AL445471.1	-0.157964	0.00689052	0.00689052	0.0272772
330	AL445471.2	-0.0595408	0.0372324	0.0372324	0.112621
331	AL031432.1	0.0203806	0.519396	0.519396	0.698448
332	SYF2	-0.329748	0.000173304	0.000173304	0.000944297
333	AL031432.5	0.01714	1.16538e-19	1.16538e-19	1.49528e-18
334	RSRP1	-0.835958	1.52478e-23	1.52478e-23	3.1968e-22
335	AL031432.3	-0.00268528	0.834377	0.834377	0.911589
336	RHD	0.00323452	1.67044e-25	1.67044e-25	1.80876e-23
337	TMEM50A	0.0298471	0.730719	0.730719	0.847916
338	RHCE	0.0244029	0.441123	0.441123	0.635134
339	MACO1	-0.120334	0.304296	0.304296	0.503905
340	LDLRAP1	0.139158	0.347589	0.347589	0.54744
341	MAN1C1	-0.0576366	0.205308	0.205308	0.393822
342	SELENON	0.0487416	0.344623	0.344623	0.545123
343	AL020996.1	0.0139261	8.72812e-23	8.72812e-23	1.56128e-21
344	MTFR1L	0.119908	0.220123	0.220123	0.41186
345	AUNIP	-0.0128689	0.737742	0.737742	0.852317
346	AL033528.2	0.076142	0.151309	0.151309	0.320027
347	PAQR7	-0.000315986	0.976716	0.976716	0.987925
348	STMN1	0.577157	0.00167357	0.00167357	0.00773711
349	PAFAH2	0.048326	0.385668	0.385668	0.583464
350	EXTL1	0.00100283	0.185336	0.185336	0.367093
351	PDIK1L	-0.0896384	0.227407	0.227407	0.419972
352	FAM110D	0.00618089	2.64854e-24	2.64854e-24	7.07191e-23
353	AL391650.1	0.0195336	0.556546	0.556546	0.726761
354	ZNF593	0.0409905	0.645083	0.645083	0.792812
355	CNKSR1	-0.0389757	0.0599816	0.0599816	0.163724
356	CEP85	0.0141005	0.858961	0.858961	0.924372
357	SH3BGRL3	0.080087	0.264535	0.264535	0.462499
358	UBXN11	-0.135325	0.0273758	0.0273758	0.0880247
359	CD52	-0.395789	0.000368879	0.000368879	0.00192291
360	CRYBG2	-0.0521026	0.0347542	0.0347542	0.106911
361	ZNF683	-0.737382	7.99227e-07	7.99227e-07	5.40506e-06
362	DHDDS	0.121514	0.181718	0.181718	0.362354
363	HMGN2	0.0742512	0.45618	0.45618	0.646823
364	RPS6KA1	-0.000580517	0.993308	0.993308	0.996679
365	AL512408.1	-0.00816395	0.523429	0.523429	0.701277
366	ARID1A	-0.0339639	0.708119	0.708119	0.834206
367	PIGV	-0.0825587	0.121422	0.121422	0.272986
368	ZDHHC18	-0.166632	0.000215309	0.000215309	0.00115904
369	SFN	-0.0318584	1.11969e-05	1.11969e-05	6.89934e-05
370	GPN2	-0.139551	0.0853015	0.0853015	0.212788
371	GPATCH3	-0.151319	0.0594318	0.0594318	0.162598
372	NUDC	-0.0532099	0.509917	0.509917	0.689979
373	KDF1	-0.0132508	0.301301	0.301301	0.500732
374	TRNP1	0.00142598	9.48286e-07	9.48286e-07	6.37667e-06
375	TENT5B	-0.0122754	0.450975	0.450975	0.642646
376	SLC9A1	0.0329714	0.618443	0.618443	0.774309
377	WDTC1	-0.128015	0.0897029	0.0897029	0.22039
378	TMEM222	0.0133301	0.915118	0.915118	0.956971
379	SYTL1	-0.484356	0.00107264	0.00107264	0.00515204
380	MAP3K6	-0.0560094	0.45455	0.45455	0.64556
381	CD164L2	-0.0124791	4.06556e-25	4.06556e-25	2.03672e-23
382	GPR3	-0.0149383	0.332491	0.332491	0.533652
383	WASF2	-0.0701917	0.405967	0.405967	0.603146
384	BX293535.1	-0.00715375	0.853102	0.853102	0.921524
385	AHDC1	-0.0153183	0.848873	0.848873	0.919104
386	FGR	0.19411	1.45789e-05	1.45789e-05	8.88255e-05
387	LINC02574	0.00461145	1.48114e-11	1.48114e-11	1.29252e-10
388	IFI6	0.193539	0.00400277	0.00400277	0.0170183
389	AL445490.1	-0.00733626	5.70742e-25	5.70742e-25	2.37094e-23
390	FAM76A	-0.013945	0.885829	0.885829	0.94086
391	STX12	0.101229	0.176197	0.176197	0.355578
392	PPP1R8	0.0441455	0.654215	0.654215	0.799371
393	THEMIS2	0.238927	0.000174302	0.000174302	0.00094922
394	RPA2	-0.0269034	0.839	0.839	0.914424
395	SMPDL3B	-0.0182113	0.15507	0.15507	0.32491
396	XKR8	-0.076506	0.404381	0.404381	0.601456
397	EYA3	-0.0984504	0.0848358	0.0848358	0.211968
398	PTAFR	0.156968	2.94027e-05	2.94027e-05	0.000174181
399	DNAJC8	0.0925448	0.279719	0.279719	0.478968
400	ATP5IF1	-0.284291	0.00356503	0.00356503	0.0153323
401	AL353622.1	-0.129363	0.00138693	0.00138693	0.00651988
402	SESN2	-0.117245	0.0110433	0.0110433	0.0413149
403	MED18	-0.00399889	0.955691	0.955691	0.977471
404	PHACTR4	0.227763	0.0324939	0.0324939	0.101299
405	RCC1	-0.237691	0.0143062	0.0143062	0.0514021
406	TRNAU1AP	0.0488895	0.581304	0.581304	0.745791
407	SNHG12	-0.119924	0.344654	0.344654	0.545124
408	TAF12	0.229785	0.0314337	0.0314337	0.098474
409	RAB42	0.0984555	0.0171229	0.0171229	0.0598984
410	LINC01715	0.0133291	0.715636	0.715636	0.838813
411	AL360012.1	-0.00349367	0.885128	0.885128	0.940334
412	GMEB1	-0.14084	0.0647777	0.0647777	0.17361
413	YTHDF2	-0.389204	0.000190514	0.000190514	0.00103303
414	EPB41	-0.0657081	0.659449	0.659449	0.8034
415	TMEM200B	0.00176571	0.236438	0.236438	0.430522
416	SRSF4	-0.0881231	0.409189	0.409189	0.60632
417	MECR	0.110926	0.17606	0.17606	0.355373
418	PTPRU	0.0123048	4.08951e-21	4.08951e-21	5.91537e-20
419	MATN1	-0.0278571	0.124815	0.124815	0.278528
420	MATN1-AS1	0.0332526	0.580054	0.580054	0.744831
421	LAPTM5	-0.0352535	0.643298	0.643298	0.791739
422	LINC01778	0.0290217	0.316067	0.316067	0.51678
423	SDC3	0.0900095	0.0239248	0.0239248	0.0789613
424	PUM1	-0.0329961	0.713311	0.713311	0.837528
425	SNRNP40	-0.167225	0.208652	0.208652	0.398325
426	ZCCHC17	-0.0404611	0.703216	0.703216	0.831698
427	AL451070.1	0.00882019	1.64855e-25	1.64855e-25	1.80876e-23
428	FABP3	0.107017	0.00500076	0.00500076	0.020667
429	SERINC2	0.0526685	6.86333e-06	6.86333e-06	4.30559e-05
430	TINAGL1	0.0242193	1.65448e-25	1.65448e-25	1.80876e-23
431	HCRTR1	0.023314	3.81555e-25	3.81555e-25	1.97212e-23
432	PEF1	-0.0318958	0.717083	0.717083	0.83975
433	AC114488.2	-0.00210775	5.38364e-08	5.38364e-08	3.92328e-07
434	AC114488.3	-0.0191267	0.291348	0.291348	0.490462
435	COL16A1	-0.0155541	0.225497	0.225497	0.418033
436	ADGRB2	0.00930836	5.80429e-15	5.80429e-15	5.88805e-14
437	SPOCD1	0.0354923	9.55776e-22	9.55776e-22	1.50132e-20
438	AL354919.1	-0.0200711	0.269318	0.269318	0.46773
439	AL136115.2	-0.00406608	7.81827e-07	7.81827e-07	5.28917e-06
440	PTP4A2	-0.0300185	0.722222	0.722222	0.842935
441	KHDRBS1	-0.107522	0.228098	0.228098	0.420671
442	AL445248.1	-0.0220264	0.223541	0.223541	0.415709
443	TMEM39B	-0.179282	0.0744506	0.0744506	0.192783
444	KPNA6	-0.278237	0.00116783	0.00116783	0.00555751
445	TXLNA	0.0917204	0.283328	0.283328	0.482231
446	CCDC28B	0.00426535	0.961979	0.961979	0.980879
447	AL049795.1	-0.0082961	2.35221e-08	2.35221e-08	1.75421e-07
448	IQCC	-0.0219113	0.57104	0.57104	0.737638
449	DCDC2B	-0.0014164	3.73815e-12	3.73815e-12	3.35983e-11
450	TMEM234	-0.174382	0.000116943	0.000116943	0.000650239
451	EIF3I	0.0175818	0.835439	0.835439	0.912179
452	FAM167B	0.00972063	0.840286	0.840286	0.91461
453	LCK	-0.408305	0.0304401	0.0304401	0.0957942
454	HDAC1	0.041929	0.758607	0.758607	0.86509
455	MARCKSL1	0.0873633	0.136149	0.136149	0.296513
456	TSSK3	0.0102954	1.86995e-23	1.86995e-23	3.82473e-22
457	FAM229A	-0.047904	0.282344	0.282344	0.481534
458	BSDC1	-0.245405	0.00156747	0.00156747	0.00728516
459	ZBTB8A	-0.0140972	0.273428	0.273428	0.471758
460	ZBTB8OS	0.0516834	0.555703	0.555703	0.726083
461	RBBP4	-0.277041	0.0156879	0.0156879	0.0556101
462	SYNC	0.0335798	0.570437	0.570437	0.737321
463	KIAA1522	-0.0238899	0.166475	0.166475	0.341132
464	YARS	-0.885645	6.88928e-11	6.88928e-11	5.82734e-10
465	S100PBP	-0.339025	0.0187681	0.0187681	0.0646148
466	FNDC5	0.00943381	2.60171e-20	2.60171e-20	3.51782e-19
467	HPCA	-0.00537004	0.674939	0.674939	0.813331
468	TMEM54	-0.00967453	0.105075	0.105075	0.2464
469	RNF19B	0.0927539	0.0478385	0.0478385	0.137216
470	AK2	0.126955	0.14986	0.14986	0.317669
471	AZIN2	-0.0709276	0.294178	0.294178	0.493389
472	TRIM62	-0.0140321	0.82565	0.82565	0.905795
473	ZNF362	-0.0314997	0.679333	0.679333	0.816466
474	A3GALT2	-0.00844544	0.509219	0.509219	0.689443
475	AL513327.1	0.00348153	4.6674e-25	4.6674e-25	2.11835e-23
476	PHC2	0.115555	0.00773139	0.00773139	0.0302544
477	ZSCAN20	-0.0399192	0.142415	0.142415	0.30664
478	SMIM12	0.260471	0.011359	0.011359	0.0422935
479	GJB5	-0.00250198	1.33121e-23	1.33121e-23	2.82036e-22
480	GJB4	0.000650987	1.86179e-25	1.86179e-25	1.80876e-23
481	GJB3	-0.000391158	0.011997	0.011997	0.0441942
482	GJA4	-0.00845449	8.77e-19	8.77e-19	1.06802e-17
483	DLGAP3	0.0323856	0.647234	0.647234	0.794125
484	AC114490.3	-0.0638376	0.0420032	0.0420032	0.124139
485	AC114490.2	0.0498618	0.515941	0.515941	0.695587
486	TMEM35B	0.138318	0.20918	0.20918	0.398783
487	ZMYM6	0.0501895	0.528231	0.528231	0.704705
488	ZMYM1	-0.0130345	0.87674	0.87674	0.934712
489	AL590434.1	0.0583964	0.153652	0.153652	0.323084
490	SFPQ	-0.419506	2.75959e-07	2.75959e-07	1.92922e-06
491	ZMYM4	0.0422594	0.55999	0.55999	0.729599
492	ZMYM4-AS1	-0.0044346	0.913502	0.913502	0.956326
493	KIAA0319L	-0.379141	0.0012127	0.0012127	0.00575198
494	NCDN	-0.319621	0.0596395	0.0596395	0.162989
495	AC004865.2	-0.306806	0.00192196	0.00192196	0.00877118
496	TFAP2E	0.00661451	0.904206	0.904206	0.950884
497	PSMB2	0.0794813	0.406607	0.406607	0.603805
498	C1orf216	-0.140724	0.104784	0.104784	0.245919
499	CLSPN	-0.090824	0.532529	0.532529	0.708299
500	AGO4	-0.0941922	0.0539682	0.0539682	0.150853
501	AGO1	-0.0408458	0.446353	0.446353	0.639102
502	AL139286.2	0.015081	1.05569e-23	1.05569e-23	2.27989e-22
503	AGO3	-0.150827	0.0399496	0.0399496	0.119208
504	TEKT2	-0.025842	0.045573	0.045573	0.132049
505	ADPRHL2	-0.12328	0.164244	0.164244	0.337796
506	COL8A2	0.112773	0.00559104	0.00559104	0.0227742
507	TRAPPC3	0.0963362	0.268706	0.268706	0.466988
508	MAP7D1	0.107863	0.139011	0.139011	0.301245
509	THRAP3	0.30708	0.00483354	0.00483354	0.0200626
510	SH3D21	0.00828744	0.828995	0.828995	0.907584
511	EVA1B	0.105102	0.0666106	0.0666106	0.177246
512	AL591845.1	-0.0224445	0.124336	0.124336	0.277798
513	STK40	0.0163545	0.684317	0.684317	0.819469
514	LSM10	-0.05191	0.563857	0.563857	0.732169
515	OSCP1	0.0119	0.692369	0.692369	0.825261
516	MRPS15	-0.037061	0.711412	0.711412	0.836226
517	CSF3R	-0.054977	0.221341	0.221341	0.413176
518	LINC01137	0.0194907	0.73582	0.73582	0.851281
519	ZC3H12A	-0.00401268	0.944353	0.944353	0.971708
520	MEAF6	0.0242539	0.844057	0.844057	0.916439
521	SNIP1	-0.33124	2.81757e-07	2.81757e-07	1.96838e-06
522	DNALI1	-0.030858	5.50219e-06	5.50219e-06	3.47665e-05
523	GNL2	-0.0384774	0.646492	0.646492	0.793747
524	C1orf109	-0.214477	0.0278412	0.0278412	0.0892783
525	CDCA8	0.0300981	0.792568	0.792568	0.885
526	MANEAL	0.0968387	0.0661352	0.0661352	0.176315
527	AL929472.3	0.0682137	0.0956061	0.0956061	0.230431
528	YRDC	0.0759491	0.150906	0.150906	0.319347
529	C1orf122	0.200595	0.00022296	0.00022296	0.00119769
530	MTF1	0.227415	0.000893001	0.000893001	0.00436429
531	AL929472.2	-0.000873578	1.43223e-14	1.43223e-14	1.42911e-13
532	INPP5B	0.0211843	0.820879	0.820879	0.902976
533	SF3A3	0.0382153	0.748657	0.748657	0.859327
534	FHL3	0.0610213	0.316005	0.316005	0.51672
535	UTP11	0.0862712	0.340163	0.340163	0.541042
536	POU3F1	-0.0505002	0.0492258	0.0492258	0.140348
537	RRAGC	0.00289208	0.95408	0.95408	0.976665
538	AL139260.1	0.00230712	0.966285	0.966285	0.983006
539	MYCBP	-0.00300252	0.978306	0.978306	0.988631
540	RHBDL2	0.00190697	1.677e-19	1.677e-19	2.12999e-18
541	AKIRIN1	-0.137972	0.118467	0.118467	0.268535
542	NDUFS5	-0.221118	0.0145748	0.0145748	0.0522033
543	MACF1	-0.12073	0.293634	0.293634	0.492928
544	BMP8A	0.00634957	2.90183e-07	2.90183e-07	2.02654e-06
545	PABPC4	0.121482	0.0775605	0.0775605	0.198932
546	AL365277.1	0.0209411	4.30169e-24	4.30169e-24	1.05347e-22
547	HPCAL4	-0.042704	0.316379	0.316379	0.517038
548	PPIE	0.03005	0.787052	0.787052	0.881242
549	BMP8B	-0.0264738	0.233576	0.233576	0.426856
550	OXCT2	0.0286396	0.289842	0.289842	0.488767
551	AL033527.3	-0.00346715	3.81678e-24	3.81678e-24	9.54479e-23
552	AL033527.5	0.00109567	0.974832	0.974832	0.986871
553	AL033527.4	0.0211853	2.36708e-22	2.36708e-22	3.99936e-21
554	TRIT1	0.0504553	0.522854	0.522854	0.70088
555	MYCL	0.00783918	0.519854	0.519854	0.698629
556	AL033527.2	-0.00325611	0.799459	0.799459	0.889358
557	MFSD2A	0.0665818	0.0361539	0.0361539	0.110162
558	CAP1	-0.00196636	0.979494	0.979494	0.989015
559	PPT1	0.177168	0.00525977	0.00525977	0.0215955
560	RLF	-0.247179	0.000740113	0.000740113	0.00367788
561	AL050341.2	-0.0334137	0.556512	0.556512	0.726761
562	ZMPSTE24	-0.0206803	0.825873	0.825873	0.905912
563	COL9A2	-0.0343409	0.376152	0.376152	0.574689
564	SMAP2	0.00269232	0.978223	0.978223	0.988631
565	AL031985.4	0.00760713	6.82589e-25	6.82589e-25	2.63419e-23
566	ZFP69B	-0.0307367	0.573832	0.573832	0.740103
567	ZFP69	-0.0487298	0.0705426	0.0705426	0.185257
568	AL603839.3	0.0452245	0.312307	0.312307	0.51255
569	EXO5	-0.0200925	0.760448	0.760448	0.866068
570	AL603839.1	0.0271168	0.348853	0.348853	0.5488
571	ZNF684	-0.159858	0.0206395	0.0206395	0.0699086
572	RIMS3	-0.00716663	0.885804	0.885804	0.94086
573	NFYC-AS1	-0.0696134	0.280392	0.280392	0.479588
574	NFYC	-0.0695758	0.394376	0.394376	0.592
575	KCNQ4	-0.00199339	0.87665	0.87665	0.934666
576	CITED4	-0.0294703	0.686229	0.686229	0.820781
577	CTPS1	0.025962	0.827946	0.827946	0.907196
578	SLFNL1-AS1	0.0236183	5.6424e-20	5.6424e-20	7.43909e-19
579	SCMH1	-0.183177	0.017268	0.017268	0.0603599
580	FOXO6	0.00885193	2.3974e-25	2.3974e-25	1.80876e-23
581	EDN2	-0.00597866	1.90854e-21	1.90854e-21	2.86794e-20
582	HIVEP3	0.141368	0.078141	0.078141	0.199937
583	FOXJ3	0.0739991	0.569343	0.569343	0.736494
584	ZMYND12	0.0352107	0.258091	0.258091	0.455591
585	PPCS	-0.146372	0.0829611	0.0829611	0.208632
586	CCDC30	-0.0627398	0.0178232	0.0178232	0.0619454
587	PPIH	-0.0779229	0.537081	0.537081	0.711976
588	YBX1	0.364336	1.47698e-05	1.47698e-05	8.9852e-05
589	P3H1	-0.0493829	0.591564	0.591564	0.754216
590	C1orf50	-0.0375294	0.714505	0.714505	0.838056
591	AC098484.3	-0.0900253	0.410614	0.410614	0.607715
592	TMEM269	-0.00316223	0.805405	0.805405	0.893236
593	SVBP	0.0811067	0.3423	0.3423	0.542853
594	ERMAP	0.165047	0.0311798	0.0311798	0.0977244
595	AL512353.1	0.0367284	0.0258954	0.0258954	0.0840849
596	ZNF691	-0.028919	0.65371	0.65371	0.799093
597	SLC2A1	-0.167762	0.07475	0.07475	0.193327
598	SLC2A1-AS1	0.000540426	0.000237131	0.000237131	0.00127072
599	FAM183A	-0.01596	0.235715	0.235715	0.429439
600	EBNA1BP2	0.0367952	0.683926	0.683926	0.819147
601	CFAP57	-0.0227077	0.0779296	0.0779296	0.19965
602	TMEM125	0.000549237	0.957059	0.957059	0.978124
603	C1orf210	-0.0105887	0.408776	0.408776	0.605842
604	TIE1	-0.0121871	0.501586	0.501586	0.683536
605	AL139289.2	-0.00238063	0.949244	0.949244	0.974446
606	CDC20	0.0975631	0.394625	0.394625	0.592202
607	ELOVL1	-0.0781362	0.33499	0.33499	0.53627
608	MED8	0.179191	0.0459727	0.0459727	0.133073
609	AL139289.1	-0.00439234	2.93272e-24	2.93272e-24	7.60843e-23
610	SZT2	0.11155	0.277577	0.277577	0.476761
611	HYI	0.0653258	0.487285	0.487285	0.671695
612	PTPRF	-0.0263874	0.048405	0.048405	0.138361
613	AL451062.3	0.00838348	0.922586	0.922586	0.961065
614	KDM4A	0.177192	0.0529272	0.0529272	0.148687
615	KDM4A-AS1	0.0234939	0.459071	0.459071	0.649047
616	ST3GAL3	-0.0440373	0.44708	0.44708	0.639512
617	ARTN	0.0095115	1.42657e-21	1.42657e-21	2.1906e-20
618	IPO13	0.0429925	0.554709	0.554709	0.725444
619	DPH2	-0.0951385	0.316865	0.316865	0.517411
620	ATP6V0B	0.233215	0.000493788	0.000493788	0.0025301
621	B4GALT2	-0.00618217	0.758886	0.758886	0.86519
622	CCDC24	-0.0831862	0.00317414	0.00317414	0.0137987
623	SLC6A9	-0.0172637	0.64104	0.64104	0.790042
624	AL139220.2	-0.0108134	0.84474	0.84474	0.916833
625	DMAP1	0.16017	0.200196	0.200196	0.386958
626	ERI3	0.200764	0.0377277	0.0377277	0.113863
627	RNF220	0.0777114	0.367742	0.367742	0.567359
628	TMEM53	0.065547	0.179515	0.179515	0.359697
629	ARMH1	-0.155666	0.0448225	0.0448225	0.13042
630	KIF2C	-0.166946	0.124557	0.124557	0.278081
631	AL592166.1	0.00182682	0.887142	0.887142	0.941261
632	RPS8	0.147013	0.0291243	0.0291243	0.0925954
633	BEST4	0.00115444	0.971988	0.971988	0.985601
634	PLK3	-0.0653655	0.106376	0.106376	0.248784
635	TCTEX1D4	-0.0185707	0.016016	0.016016	0.0566334
636	BTBD19	0.100957	0.0500958	0.0500958	0.142371
637	PTCH2	0.0842665	0.249194	0.249194	0.445478
638	EIF2B3	0.0204384	0.822386	0.822386	0.903941
639	HECTD3	-0.195984	0.0109857	0.0109857	0.0411394
640	UROD	0.207137	0.0194807	0.0194807	0.0666234
641	ZSWIM5	-0.0336182	0.0637692	0.0637692	0.171521
642	LINC01144	0.0657436	0.217424	0.217424	0.408821
643	HPDL	0.072304	0.186912	0.186912	0.369232
644	MUTYH	-0.153679	0.184035	0.184035	0.365453
645	TOE1	-0.181631	0.165466	0.165466	0.339753
646	TESK2	0.00568313	0.915516	0.915516	0.957121
647	CCDC163	0.000958111	0.983852	0.983852	0.99121
648	MMACHC	0.151938	0.0133807	0.0133807	0.0485268
649	PRDX1	0.422594	5.02552e-08	5.02552e-08	3.6663e-07
650	AKR1A1	0.223155	0.000658689	0.000658689	0.00330429
651	NASP	-0.0681669	0.616762	0.616762	0.772913
652	CCDC17	-0.0221119	0.000806128	0.000806128	0.00397938
653	GPBP1L1	-0.165904	0.10543	0.10543	0.247147
654	TMEM69	-0.00638566	0.937038	0.937038	0.967922
655	IPP	-0.0935647	0.152645	0.152645	0.321776
656	MAST2	-0.0470654	0.528068	0.528068	0.70457
657	PIK3R3	-0.0560469	0.297926	0.297926	0.497475
658	TSPAN1	-0.025094	0.149291	0.149291	0.316931
659	POMGNT1	0.116412	0.227788	0.227788	0.420328
660	LURAP1	0.0218866	2.69e-24	2.69e-24	7.15412e-23
661	RAD54L	-0.0416553	0.607391	0.607391	0.765559
662	LRRC41	0.0591252	0.601219	0.601219	0.761072
663	UQCRH	0.0213139	0.815686	0.815686	0.899231
664	NSUN4	-0.024234	0.772156	0.772156	0.872629
665	FAAH	-0.00150927	0.903586	0.903586	0.950431
666	DMBX1	0.000614311	0.841683	0.841683	0.915146
667	MKNK1	0.00446758	0.946342	0.946342	0.973023
668	MOB3C	0.0212676	0.748743	0.748743	0.859357
669	ATPAF1	-0.0494881	0.606055	0.606055	0.764546
670	EFCAB14	-0.109393	0.20891	0.20891	0.398552
671	CYP4B1	-0.0273864	1.73722e-10	1.73722e-10	1.44632e-09
672	CYP4X1	-0.00393331	4.2151e-25	4.2151e-25	2.06201e-23
673	PDZK1IP1	-0.00663146	1.23789e-09	1.23789e-09	9.83752e-09
674	STIL	-0.0353708	0.674566	0.674566	0.813295
675	CMPK1	-0.0566275	0.562576	0.562576	0.731388
676	FOXD2-AS1	-0.00232876	0.945724	0.945724	0.972521
677	FOXD2	-0.0266328	0.300542	0.300542	0.500057
678	SLC5A9	-0.00651366	1.31753e-11	1.31753e-11	1.15276e-10
679	SPATA6	0.0073724	0.639205	0.639205	0.788941
680	AGBL4	-0.00783535	3.56155e-25	3.56155e-25	1.92428e-23
681	BEND5	-0.100747	0.00535075	0.00535075	0.0219377
682	ELAVL4	-0.00343864	0.850394	0.850394	0.920138
683	DMRTA2	0.0019895	0.053585	0.053585	0.150032
684	FAF1	-0.150658	0.054428	0.054428	0.1518
685	CDKN2C	-0.265515	0.000952605	0.000952605	0.00462523
686	RNF11	0.113243	0.200799	0.200799	0.387751
687	TTC39A	-0.00291435	0.000267503	0.000267503	0.00142248
688	TTC39A-AS1	-0.00163488	4.9062e-15	4.9062e-15	4.99211e-14
689	EPS15	-0.296359	0.00655906	0.00655906	0.0261193
690	AC104170.1	-0.0263288	0.517259	0.517259	0.696537
691	OSBPL9	-0.183696	0.0540456	0.0540456	0.151006
692	NRDC	0.0521434	0.562727	0.562727	0.731457
693	AL050343.1	-0.00859237	0.81049	0.81049	0.895812
694	AL050343.2	0.00813064	1.65021e-25	1.65021e-25	1.80876e-23
695	RAB3B	-0.0473336	0.0645054	0.0645054	0.172996
696	TXNDC12	-0.0144514	0.875215	0.875215	0.933829
697	KTI12	-0.23104	0.0416941	0.0416941	0.123425
698	AL445685.1	0.00565905	0.661541	0.661541	0.80493
699	BTF3L4	0.0731978	0.325068	0.325068	0.525498
700	ZFYVE9	-0.0164747	0.670294	0.670294	0.810307
701	CC2D1B	-0.039282	0.646034	0.646034	0.79361
702	ORC1	-0.00639365	0.941561	0.941561	0.970858
703	PRPF38A	0.167562	0.141768	0.141768	0.305721
704	TUT4	-0.651216	3.19221e-06	3.19221e-06	2.05977e-05
705	GPX7	-0.0396436	0.783972	0.783972	0.879606
706	SHISAL2A	0.0227365	0.834562	0.834562	0.911688
707	COA7	0.00175422	0.975845	0.975845	0.987506
708	ZYG11B	0.0860539	0.273255	0.273255	0.471633
709	ZYG11A	-0.00245316	0.000528687	0.000528687	0.00269518
710	ECHDC2	-0.286403	0.019503	0.019503	0.0666883
711	SCP2	-0.161758	0.0829414	0.0829414	0.208609
712	SLC1A7	-0.0351924	0.111902	0.111902	0.257893
713	CPT2	0.191456	0.0556786	0.0556786	0.154495
714	AL606760.2	-0.0158673	0.219273	0.219273	0.411091
715	C1orf123	-0.0309445	0.770961	0.770961	0.871907
716	AL606760.3	-0.0224558	0.215337	0.215337	0.406087
717	MAGOH	0.0382661	0.730565	0.730565	0.847916
718	AL606760.1	-6.00327e-06	0.999745	0.999745	0.999795
719	LRP8	-0.0695507	0.42622	0.42622	0.622427
720	LINC01771	-0.0115054	0.765783	0.765783	0.868998
721	AC119428.2	-0.0112615	0.378928	0.378928	0.577352
722	NDC1	-0.109166	0.237929	0.237929	0.432179
723	YIPF1	0.122573	0.164288	0.164288	0.337833
724	DIO1	0.00541775	1.38136e-22	1.38136e-22	2.39428e-21
725	HSPB11	-0.125576	0.221101	0.221101	0.412933
726	LRRC42	-0.100167	0.235674	0.235674	0.429402
727	LDLRAD1	-0.016494	1.9053e-21	1.9053e-21	2.86522e-20
728	TMEM59	-0.0928246	0.280692	0.280692	0.479905
729	TCEANC2	0.00867512	0.927135	0.927135	0.963408
730	AL357673.1	0.0622297	0.0328133	0.0328133	0.102112
731	CYB5RL	-0.00166879	0.897099	0.897099	0.94663
732	MRPL37	0.198721	0.0971093	0.0971093	0.232998
733	SSBP3	0.0931371	0.197361	0.197361	0.383654
734	SSBP3-AS1	-0.00557551	0.663235	0.663235	0.805877
735	ACOT11	0.0149752	0.0895127	0.0895127	0.220125
736	MROH7	-0.0128845	0.313599	0.313599	0.51404
737	TTC4	0.0255358	0.794004	0.794004	0.885869
738	PARS2	-0.0115483	0.605236	0.605236	0.763869
739	TTC22	-0.089235	0.254668	0.254668	0.452093
740	DHCR24	-0.108338	0.0319612	0.0319612	0.0999086
741	AC096536.3	0.0129919	0.318966	0.318966	0.518904
742	TMEM61	-0.001538	9.53489e-14	9.53489e-14	9.16389e-13
743	BSND	-0.00162832	0.0297353	0.0297353	0.0940917
744	USP24	-0.18537	0.0306412	0.0306412	0.0963365
745	MIR4422HG	-0.0422424	0.0993704	0.0993704	0.236807
746	AC119674.1	0.00123627	0.197742	0.197742	0.383969
747	AC119674.2	0.00511452	0.794107	0.794107	0.885914
748	PLPP3	0.117513	0.000338783	0.000338783	0.00177431
749	PRKAA2	-0.00593506	1.8911e-25	1.8911e-25	1.80876e-23
750	FYB2	-0.00731233	1.38676e-20	1.38676e-20	1.90974e-19
751	C8B	-0.0177275	0.166598	0.166598	0.341345
752	DAB1	0.0219999	0.519491	0.519491	0.698468
753	OMA1	0.0322247	0.775528	0.775528	0.874672
754	TACSTD2	-0.0564554	4.62476e-09	4.62476e-09	3.56266e-08
755	MYSM1	-0.271077	0.00590589	0.00590589	0.0238969
756	JUN	-0.680494	2.32721e-17	2.32721e-17	2.63759e-16
757	LINC01135	-0.0859348	0.00938582	0.00938582	0.0358154
758	AL136985.2	-0.0190594	0.292278	0.292278	0.491349
759	AC105277.1	-0.011906	0.758728	0.758728	0.86509
760	LINC01358	-0.199534	0.0520272	0.0520272	0.146712
761	AL592431.1	0.0113774	2.73275e-24	2.73275e-24	7.22957e-23
762	AC093424.1	-0.014819	6.16757e-13	6.16757e-13	5.74675e-12
763	FGGY	-0.0161761	0.695832	0.695832	0.827456
764	HOOK1	0.0477398	0.37791	0.37791	0.57636
765	CYP2J2	0.0301555	0.298875	0.298875	0.498562
766	C1orf87	-0.00898621	3.03909e-23	3.03909e-23	5.88103e-22
767	NFIA	0.0711387	0.367406	0.367406	0.567021
768	TM2D1	-0.036664	0.658354	0.658354	0.802672
769	AC099791.2	-0.0544836	0.033028	0.033028	0.102653
770	PATJ	-0.259638	0.0117826	0.0117826	0.0435802
771	L1TD1	0.0131854	9.60683e-21	9.60683e-21	1.33671e-19
772	USP1	-0.0984678	0.457457	0.457457	0.647675
773	DOCK7	0.152964	0.0269907	0.0269907	0.0870507
774	AC103923.1	0.000761746	0.228997	0.228997	0.421824
775	ATG4C	0.102784	0.276643	0.276643	0.475562
776	FOXD3-AS1	0.00798304	4.48769e-25	4.48769e-25	2.10266e-23
777	FOXD3	0.0112695	1.82006e-24	1.82006e-24	5.20543e-23
778	ALG6	-0.0657403	0.548547	0.548547	0.720761
779	ITGB3BP	-0.146548	0.128687	0.128687	0.284953
780	EFCAB7	-0.197783	0.00791059	0.00791059	0.0308656
781	PGM1	-0.064357	0.657203	0.657203	0.801707
782	ROR1-AS1	-0.00637337	3.82063e-23	3.82063e-23	7.28129e-22
783	CACHD1	-0.00484912	1.8958e-14	1.8958e-14	1.87953e-13
784	RAVER2	0.000191411	0.88778	0.88778	0.941689
785	JAK1	0.392539	4.57789e-05	4.57789e-05	0.000266637
786	AL357078.3	0.00671671	2.57194e-17	2.57194e-17	2.9035e-16
787	AL357078.1	-0.000666744	0.733801	0.733801	0.850021
788	AK4	0.128551	3.59176e-05	3.59176e-05	0.000211405
789	DNAJC6	-0.00391951	0.914778	0.914778	0.956798
790	LEPROT	0.191163	0.001915	0.001915	0.00874471
791	LEPR	0.030032	0.344748	0.344748	0.545162
792	PDE4B	-0.388942	3.07356e-06	3.07356e-06	1.98512e-05
793	SGIP1	-0.000352629	0.711794	0.711794	0.83648
794	TCTEX1D1	-0.00336721	0.741034	0.741034	0.854608
795	WDR78	-0.0136261	0.683809	0.683809	0.819055
796	MIER1	-0.113272	0.23597	0.23597	0.429826
797	SLC35D1	-0.17238	0.054536	0.054536	0.15201
798	C1orf141	-0.0063783	2.76103e-22	2.76103e-22	4.6261e-21
799	IL23R	-0.0371655	0.563236	0.563236	0.731653
800	IL12RB2	-0.70439	2.38827e-07	2.38827e-07	1.67487e-06
801	SERBP1	0.0804752	0.441847	0.441847	0.63569
802	GADD45A	-0.11201	0.0501353	0.0501353	0.142416
803	GNG12	0.00776833	0.442553	0.442553	0.636239
804	DIRAS3	0.000287902	0.347384	0.347384	0.547374
805	WLS	-0.00559955	0.664901	0.664901	0.807224
806	DEPDC1	-0.137348	0.0391369	0.0391369	0.117322
807	LRRC40	0.0254494	0.827386	0.827386	0.906909
808	SRSF11	-0.227731	0.0286482	0.0286482	0.0913852
809	AL353771.1	0.0112555	2.17189e-25	2.17189e-25	1.80876e-23
810	ANKRD13C	-0.148478	0.18489	0.18489	0.366572
811	HHLA3	0.0138304	0.83613	0.83613	0.912591
812	CTH	0.0243425	0.699497	0.699497	0.829339
813	PTGER3	-0.0175041	0.173878	0.173878	0.352134
814	AL031429.1	0.0216773	4.93999e-22	4.93999e-22	7.99705e-21
815	ZRANB2	-0.351397	0.00114647	0.00114647	0.00546878
816	NEGR1	-0.0010593	0.0114445	0.0114445	0.0425488
817	LRRIQ3	-0.0387289	0.0967619	0.0967619	0.232381
818	FPGT	-0.00214972	0.959191	0.959191	0.979257
819	FPGT-TNNI3K	0.0212006	0.502835	0.502835	0.684774
820	ERICH3	-0.0142496	1.65573e-25	1.65573e-25	1.80876e-23
821	CRYZ	-0.154362	0.118274	0.118274	0.268339
822	TYW3	-0.0744115	0.47143	0.47143	0.659103
823	ACADM	0.0910119	0.487722	0.487722	0.671809
824	RABGGTB	-0.152053	0.0971548	0.0971548	0.233074
825	MSH4	-0.0105629	2.00902e-09	2.00902e-09	1.57787e-08
826	ST6GALNAC3	-0.023507	0.256993	0.256993	0.45473
827	PIGK	-0.0127025	0.903512	0.903512	0.950425
828	AK5	0.0144053	1.09671e-09	1.09671e-09	8.73975e-09
829	AC118549.1	-0.333545	0.00292449	0.00292449	0.012816
830	USP33	0.14461	0.267009	0.267009	0.465211
831	MIGA1	0.0258019	0.832774	0.832774	0.910432
832	NEXN-AS1	-0.0038727	2.17278e-07	2.17278e-07	1.52748e-06
833	NEXN	-0.0110599	0.543424	0.543424	0.716982
834	FUBP1	-0.100275	0.347334	0.347334	0.547356
835	DNAJB4	-0.0470252	0.405141	0.405141	0.602258
836	GIPC2	0.0010583	0.0430792	0.0430792	0.126575
837	AC103591.3	-0.250635	1.87692e-06	1.87692e-06	1.23204e-05
838	PTGFR	-0.0041217	0.749087	0.749087	0.859409
839	IFI44L	-0.278686	0.00934413	0.00934413	0.0356834
840	IFI44	-0.221022	0.0867258	0.0867258	0.215459
841	LINC01781	-0.00172676	1.89284e-05	1.89284e-05	0.000113774
842	ADGRL2	-0.004617	1.99071e-16	1.99071e-16	2.14727e-15
843	LINC01725	-0.00363754	7.26807e-07	7.26807e-07	4.93855e-06
844	TTLL7	0.0421733	0.244208	0.244208	0.439512
845	AL359504.2	-0.0320457	0.147959	0.147959	0.314968
846	PRKACB	-0.157699	0.370196	0.370196	0.569223
847	DNASE2B	0.0124178	0.0333217	0.0333217	0.103374
848	RPF1	-0.0367199	0.777862	0.777862	0.875879
849	GNG5	0.21584	0.00233197	0.00233197	0.0104611
850	SPATA1	-0.0461132	0.362695	0.362695	0.56216
851	CTBS	-0.0502678	0.467732	0.467732	0.656068
852	SSX2IP	-0.0192613	0.779815	0.779815	0.876752
853	LPAR3	0.0251744	0.0804004	0.0804004	0.204083
854	MCOLN2	-0.119384	0.403407	0.403407	0.600636
855	WDR63	-0.00487659	0.889237	0.889237	0.942472
856	MCOLN3	-0.0538639	0.353798	0.353798	0.553382
857	SYDE2	0.0336209	0.288829	0.288829	0.487777
858	C1orf52	-0.223245	0.0190463	0.0190463	0.0653268
859	BCL10	0.079324	0.343502	0.343502	0.543943
860	AL078459.1	0.0386284	0.183144	0.183144	0.364386
861	DDAH1	-0.00140525	9.88528e-05	9.88528e-05	0.000554403
862	CYR61	0.00516396	0.774517	0.774517	0.874144
863	ZNHIT6	-0.202634	0.0259029	0.0259029	0.0840917
864	COL24A1	-0.00263329	0.839824	0.839824	0.914559
865	AL136382.1	0.0109292	0.729796	0.729796	0.847726
866	ODF2L	-0.611075	9.47597e-09	9.47597e-09	7.20862e-08
867	CLCA2	-0.00118091	0.0672838	0.0672838	0.178565
868	CLCA4	0.00696858	1.53673e-24	1.53673e-24	4.60469e-23
869	AL356270.1	-0.00389175	1.18223e-23	1.18223e-23	2.52603e-22
870	AL049597.2	-0.00175684	0.969468	0.969468	0.984749
871	SH3GLB1	0.106235	0.154801	0.154801	0.324605
872	SELENOF	0.0109017	0.898271	0.898271	0.947182
873	HS2ST1	-0.124616	0.0365551	0.0365551	0.111124
874	LINC01140	0.0103676	2.15393e-23	2.15393e-23	4.33069e-22
875	AC099062.1	0.0174091	6.10646e-25	6.10646e-25	2.44902e-23
876	LMO4	-0.260449	0.0101956	0.0101956	0.0385675
877	PKN2	-0.128036	0.184644	0.184644	0.366191
878	GTF2B	-0.118941	0.212933	0.212933	0.403223
879	KYAT3	-0.0944465	0.438617	0.438617	0.632946
880	RBMXL1	-0.0532529	0.491781	0.491781	0.675342
881	GBP3	0.0218611	0.793929	0.793929	0.885869
882	GBP1	0.23185	0.00263545	0.00263545	0.0116869
883	GBP2	0.103408	0.249299	0.249299	0.445626
884	GBP7	-0.00895877	8.86424e-25	8.86424e-25	3.11581e-23
885	GBP4	0.0150859	0.893953	0.893953	0.944896
886	AC099063.4	-0.0400325	0.536834	0.536834	0.711743
887	GBP5	-0.00588869	0.958059	0.958059	0.978649
888	AC099063.1	-0.0329859	0.0683317	0.0683317	0.180797
889	GBP6	-0.0146439	0.254862	0.254862	0.452233
890	LRRC8B	0.021176	0.771252	0.771252	0.872051
891	LRRC8C-DT	-0.0157871	0.858689	0.858689	0.924268
892	LRRC8C	-0.168574	0.183846	0.183846	0.36515
893	AC099568.2	0.00301951	0.815451	0.815451	0.899219
894	LRRC8D	-0.103087	0.457563	0.457563	0.647752
895	ZNF326	-0.0885567	0.370079	0.370079	0.569087
896	ZNF644	-0.245176	0.0162128	0.0162128	0.0572087
897	CDC7	-0.130246	0.243511	0.243511	0.438878
898	TGFBR3	-0.288213	0.0513701	0.0513701	0.145246
899	EPHX4	-0.0173252	0.338762	0.338762	0.539653
900	SETSIP	-0.014262	0.431084	0.431084	0.626545
901	BTBD8	-0.0460133	0.317629	0.317629	0.518156
902	AC104836.1	-0.003561	0.844983	0.844983	0.916954
903	GLMN	-0.457731	0.000954946	0.000954946	0.00463436
904	RPAP2	-0.337912	0.0236996	0.0236996	0.078437
905	GFI1	-0.218119	0.0589829	0.0589829	0.16159
906	EVI5	0.102015	0.0264298	0.0264298	0.0854612
907	RPL5	0.0896686	0.309444	0.309444	0.509195
908	FAM69A	-0.0382391	0.7688	0.7688	0.870747
909	MTF2	-0.366873	0.000753776	0.000753776	0.00373839
910	TMED5	0.0916489	0.251493	0.251493	0.448194
911	CCDC18	-0.0646574	0.419671	0.419671	0.616097
912	DR1	-0.28034	0.0161694	0.0161694	0.0570853
913	FNBP1L	0.0675267	0.125104	0.125104	0.278986
914	BCAR3	0.0460714	0.174799	0.174799	0.353501
915	DNTTIP2	-0.0926215	0.222551	0.222551	0.414616
916	GCLM	0.149585	0.0483052	0.0483052	0.138233
917	ABCA4	0.000357598	2.10125e-07	2.10125e-07	1.47822e-06
918	ARHGAP29	-0.0083502	9.69887e-17	9.69887e-17	1.05924e-15
919	AC097059.1	0.000788886	0.0228699	0.0228699	0.0762938
920	ABCD3	-0.099849	0.188723	0.188723	0.371642
921	F3	-9.01189e-05	0.995607	0.995607	0.99799
922	SLC44A3	-0.00136935	0.967695	0.967695	0.984091
923	CNN3	-0.0314369	0.116028	0.116028	0.264887
924	ALG14	-0.121999	0.0142651	0.0142651	0.05129
925	TMEM56	-0.00606584	1.23984e-23	1.23984e-23	2.64572e-22
926	TMEM56-RWDD3	0.00495676	0.000877955	0.000877955	0.00429643
927	AC092802.1	-0.00581028	1.22119e-22	1.22119e-22	2.12767e-21
928	RWDD3	-0.177207	0.168603	0.168603	0.3444
929	PTBP2	-0.0853674	0.29569	0.29569	0.495016
930	DPYD	-0.028177	0.642448	0.642448	0.791124
931	DPYD-AS1	0.007414	1.51154e-21	1.51154e-21	2.3111e-20
932	SNX7	-0.00805639	0.517854	0.517854	0.697012
933	LINC01708	0.00872347	1.87758e-25	1.87758e-25	1.80876e-23
934	PALMD	-0.00723987	2.14132e-25	2.14132e-25	1.80876e-23
935	FRRS1	0.00443472	0.745325	0.745325	0.857196
936	AGL	-0.235782	0.00786978	0.00786978	0.0307243
937	AC118553.1	-0.0214827	0.179156	0.179156	0.35942
938	SLC35A3	0.158564	0.102197	0.102197	0.241796
939	AC118553.2	-0.0301947	0.566696	0.566696	0.73448
940	MFSD14A	-0.284047	0.0384583	0.0384583	0.115703
941	SASS6	-0.0552994	0.526561	0.526561	0.703317
942	TRMT13	-0.0799244	0.370453	0.370453	0.569283
943	LRRC39	-0.0130005	0.473385	0.473385	0.660301
944	DBT	-0.0267082	0.626733	0.626733	0.779674
945	RTCA-AS1	0.125786	0.036545	0.036545	0.111124
946	RTCA	-0.0145623	0.896941	0.896941	0.946623
947	CDC14A	-0.372524	0.00952279	0.00952279	0.0362783
948	VCAM1	-0.0029973	0.938304	0.938304	0.968506
949	EXTL2	-0.00779676	0.880659	0.880659	0.937448
950	AC104506.1	-0.00558103	0.805184	0.805184	0.893064
951	SLC30A7	-0.0883997	0.312542	0.312542	0.512685
952	DPH5	-0.181309	0.0472637	0.0472637	0.135871
953	AC093157.2	0.0373929	0.196969	0.196969	0.383115
954	AC093157.1	0.0614964	0.4337	0.4337	0.62883
955	AL109741.1	-0.0948705	0.115173	0.115173	0.263383
956	S1PR1	-0.447293	0.0161299	0.0161299	0.0569862
957	RNPC3	0.00988634	0.925775	0.925775	0.962887
958	AMY2B	-0.0863591	0.0117383	0.0117383	0.0434561
959	AMY1B	0.000671573	0.00292867	0.00292867	0.0128259
960	PRMT6	-0.0354344	0.621596	0.621596	0.776214
961	VAV3	-0.00846935	0.914385	0.914385	0.956685
962	VAV3-AS1	-0.00343063	0.789542	0.789542	0.883095
963	AL390036.1	0.0644506	4.0295e-05	4.0295e-05	0.000236202
964	SLC25A24	0.115021	0.0636053	0.0636053	0.171221
965	AL359258.2	0.093428	0.139442	0.139442	0.301919
966	FAM102B	-0.100207	0.15354	0.15354	0.323018
967	HENMT1	0.0315261	0.836269	0.836269	0.912615
968	PRPF38B	-0.460458	4.90723e-05	4.90723e-05	0.000285076
969	FNDC7	0.0210756	0.505378	0.505378	0.686563
970	STXBP3	0.0316451	0.721077	0.721077	0.842416
971	AKNAD1	0.0154367	4.57655e-24	4.57655e-24	1.11177e-22
972	AL449266.1	0.0394576	0.406467	0.406467	0.603754
973	GPSM2	-0.108503	0.0244067	0.0244067	0.0803014
974	CLCC1	0.0887758	0.187945	0.187945	0.370612
975	WDR47	-0.109743	0.166196	0.166196	0.340854
976	TAF13	0.0665512	0.189405	0.189405	0.372365
977	AL356488.3	-0.0462727	0.0559361	0.0559361	0.155039
978	TMEM167B	0.00105985	0.988262	0.988262	0.993649
979	AL356488.2	-0.0302823	0.0957563	0.0957563	0.230683
980	C1orf194	-0.0240113	4.02688e-22	4.02688e-22	6.57178e-21
981	KIAA1324	-0.0914212	0.219341	0.219341	0.411119
982	SARS	0.138688	0.256578	0.256578	0.454195
983	CELSR2	-0.0577465	0.056411	0.056411	0.15614
984	PSRC1	-0.0478837	0.226443	0.226443	0.418962
985	MYBPHL	0.00652206	2.71762e-24	2.71762e-24	7.20357e-23
986	SORT1	0.124732	0.00792103	0.00792103	0.0308883
987	PSMA5	0.186916	0.0554235	0.0554235	0.154
988	SYPL2	0.0124386	1.80823e-25	1.80823e-25	1.80876e-23
989	ATXN7L2	-0.232678	0.00645315	0.00645315	0.0257333
990	CYB561D1	-0.170856	0.06589	0.06589	0.175817
991	AMIGO1	0.00693053	2.24836e-25	2.24836e-25	1.80876e-23
992	GPR61	-0.00180321	4.06156e-17	4.06156e-17	4.53677e-16
993	GNAI3	-0.0438019	0.568327	0.568327	0.735717
994	GNAT2	0.0158801	3.80078e-25	3.80078e-25	1.96955e-23
995	AMPD2	0.0448212	0.528731	0.528731	0.705138
996	GSTM4	-0.00847686	0.925375	0.925375	0.962873
997	GSTM2	-0.0846668	0.452819	0.452819	0.644314
998	GSTM1	0.318269	0.0200093	0.0200093	0.0680955
999	AC000032.1	0.0935557	0.0660381	0.0660381	0.176149
1000	GSTM5	0.0118215	7.53605e-24	7.53605e-24	1.7063e-22
1001	GSTM3	-0.0301773	0.690876	0.690876	0.824231
1002	EPS8L3	-0.00262578	3.79912e-17	3.79912e-17	4.2507e-16
1003	AL450468.1	-0.000739636	0.954126	0.954126	0.976665
1004	AL450468.2	-0.026688	3.68215e-12	3.68215e-12	3.31097e-11
1005	CSF1	0.0133937	0.837622	0.837622	0.913448
1006	AHCYL1	0.154077	0.00880742	0.00880742	0.0339432
1007	STRIP1	-0.155913	0.143912	0.143912	0.309193
1008	AL160006.1	-0.0259458	0.155062	0.155062	0.32491
1009	LINC02586	0.0276543	0.291526	0.291526	0.490619
1010	KCNC4	-0.0525259	0.0824596	0.0824596	0.207709
1011	RBM15-AS1	0.0383799	0.261508	0.261508	0.459524
1012	RBM15	-0.342908	0.00430064	0.00430064	0.0181238
1013	SLC16A4	-0.0053823	0.880373	0.880373	0.937293
1014	AL355488.1	-0.0561844	0.0421739	0.0421739	0.124542
1015	LAMTOR5	0.149241	0.0601923	0.0601923	0.164187
1016	KCNA2	-0.00667251	0.854649	0.854649	0.92241
1017	AL365361.1	-0.206287	0.0222893	0.0222893	0.0746666
1018	KCNA3	-0.324223	0.0377422	0.0377422	0.113889
1019	CD53	-0.242549	0.00246451	0.00246451	0.0109992
1020	AL360270.1	-0.0325116	0.498709	0.498709	0.681219
1021	LRIF1	0.0929574	0.296027	0.296027	0.495175
1022	AL360270.3	0.0771773	0.226222	0.226222	0.418822
1023	DRAM2	0.0706898	0.264201	0.264201	0.462237
1024	CEPT1	0.111404	0.258376	0.258376	0.455808
1025	AL355816.2	-0.0299088	0.108069	0.108069	0.25146
1026	DENND2D	-0.161559	0.138651	0.138651	0.300595
1027	CHI3L2	0.0256896	0.7284	0.7284	0.847149
1028	PIFO	-0.011932	0.618609	0.618609	0.774408
1029	OVGP1	-0.00331534	1.25403e-19	1.25403e-19	1.60698e-18
1030	WDR77	-0.122049	0.145002	0.145002	0.310768
1031	ATP5PB	0.198381	0.0432611	0.0432611	0.126961
1032	C1orf162	0.0982081	0.0424306	0.0424306	0.125123
1033	TMIGD3	0.0371207	0.290848	0.290848	0.48997
1034	ADORA3	0.0486154	0.0948543	0.0948543	0.229196
1035	RAP1A	-0.182315	0.033912	0.033912	0.104865
1036	LINC01160	-0.0309442	0.162806	0.162806	0.33583
1037	INKA2	0.00389353	0.685758	0.685758	0.820364
1038	DDX20	-0.1825	0.0355635	0.0355635	0.108884
1039	KCND3	0.000104807	0.465325	0.465325	0.654264
1040	CTTNBP2NL	0.0533746	0.0208514	0.0208514	0.0705313
1041	WNT2B	-0.0179365	0.22102	0.22102	0.412933
1042	ST7L	-0.155318	0.0248223	0.0248223	0.0814156
1043	CAPZA1	-0.1885	0.0161344	0.0161344	0.0569918
1044	MOV10	0.188115	0.113575	0.113575	0.260736
1045	AL603832.1	0.0104287	3.83494e-22	3.83494e-22	6.28917e-21
1046	RHOC	0.198798	0.00777343	0.00777343	0.0303953
1047	PPM1J	0.0184815	5.54828e-25	5.54828e-25	2.33376e-23
1048	AL603832.2	-0.00447335	3.07551e-05	3.07551e-05	0.000181925
1049	AL390729.1	-0.011823	0.514396	0.514396	0.694123
1050	SLC16A1	-0.16565	0.150823	0.150823	0.319235
1051	SLC16A1-AS1	-0.182087	0.0685728	0.0685728	0.181292
1052	AL357055.3	0.0160774	0.612252	0.612252	0.76966
1053	LRIG2	-0.233152	0.00566655	0.00566655	0.0230398
1054	MAGI3	-0.0117523	0.749293	0.749293	0.859449
1055	PHTF1	-0.248586	0.0163161	0.0163161	0.0574961
1056	RSBN1	-0.839938	1.51564e-11	1.51564e-11	1.32092e-10
1057	AL137856.1	0.0315907	0.318436	0.318436	0.518803
1058	PTPN22	-0.82881	1.4883e-05	1.4883e-05	9.04861e-05
1059	AP4B1-AS1	0.0032293	2.97518e-16	2.97518e-16	3.19035e-15
1060	BCL2L15	-0.0331813	0.135224	0.135224	0.295042
1061	AP4B1	0.0284438	0.798116	0.798116	0.888484
1062	DCLRE1B	0.0123163	0.840524	0.840524	0.914692
1063	HIPK1-AS1	-0.025881	0.540954	0.540954	0.71513
1064	HIPK1	-0.146796	0.0243637	0.0243637	0.0801729
1065	OLFML3	-0.0165739	0.653245	0.653245	0.798818
1066	SYT6	0.00436401	5.40933e-12	5.40933e-12	4.82306e-11
1067	TRIM33	-0.132781	0.0516106	0.0516106	0.145721
1068	BCAS2	-0.149492	0.107807	0.107807	0.250992
1069	DENND2C	0.0206492	0.345565	0.345565	0.545877
1070	AMPD1	-0.00275321	2.73398e-25	2.73398e-25	1.80876e-23
1071	NRAS	-0.00649976	0.926533	0.926533	0.963092
1072	CSDE1	-0.0965045	0.305959	0.305959	0.505352
1073	SIKE1	-0.00417522	0.972099	0.972099	0.985629
1074	TSPAN2	0.0477466	0.660646	0.660646	0.804241
1075	LINC01765	-0.0124404	0.332262	0.332262	0.533455
1076	VANGL1	-0.0431171	0.680507	0.680507	0.817242
1077	SLC22A15	0.0213476	0.436368	0.436368	0.631025
1078	MAB21L3	-0.00877923	1.40559e-09	1.40559e-09	1.11132e-08
1079	ATP1A1	0.26657	0.000774542	0.000774542	0.00383098
1080	LINC01762	-0.0419839	0.0581594	0.0581594	0.159704
1081	AL390066.1	-0.0495161	0.0256728	0.0256728	0.0835508
1082	CD58	0.0931084	0.26217	0.26217	0.460245
1083	IGSF3	-0.00568377	0.657825	0.657825	0.80229
1084	CD2	-0.946477	3.71974e-08	3.71974e-08	2.73752e-07
1085	PTGFRN	-0.0054819	0.87904	0.87904	0.93632
1086	CD101	-0.416481	0.000444881	0.000444881	0.0022953
1087	AL445231.1	-0.0178796	0.323616	0.323616	0.524244
1088	TTF2	-0.0956152	0.433775	0.433775	0.628858
1089	TRIM45	-0.0705636	0.0144851	0.0144851	0.0519231
1090	VTCN1	0.00877525	4.24394e-23	4.24394e-23	8.00456e-22
1091	AL358072.1	-0.00136657	8.95643e-13	8.95643e-13	8.27184e-12
1092	MAN1A2	-0.0640498	0.506409	0.506409	0.687163
1093	AL157902.1	-0.0584819	0.0407215	0.0407215	0.121073
1094	TENT5C	-0.00513179	0.979695	0.979695	0.989091
1095	GDAP2	-0.166282	0.0372795	0.0372795	0.11273
1096	WDR3	-0.0536809	0.55369	0.55369	0.72496
1097	SPAG17	-0.0210963	0.0825616	0.0825616	0.20786
1098	WARS2	-0.180155	0.0894579	0.0894579	0.220071
1099	AL359915.2	-0.197166	0.00218675	0.00218675	0.00986464
1100	ZNF697	0.0475723	5.85737e-07	5.85737e-07	4.00845e-06
1101	PHGDH	-0.0925762	0.334743	0.334743	0.536069
1102	NOTCH2	0.0354698	0.480049	0.480049	0.6657
1103	SEC22B	0.0686412	0.28255	0.28255	0.48174
1104	NBPF26	0.164049	0.00848835	0.00848835	0.0328332
1105	PPIAL4A	0.00148227	2.81793e-17	2.81793e-17	3.17408e-16
1106	LINC00623	-0.406553	0.00304884	0.00304884	0.0132943
1107	FCGR1B	-0.0167708	0.569522	0.569522	0.736624
1108	AC244453.3	0.00192418	7.65457e-07	7.65457e-07	5.1889e-06
1109	AC244453.2	0.030523	0.29294	0.29294	0.492013
1110	FAM72B	-0.070809	0.226836	0.226836	0.419263
1111	SRGAP2C	0.135839	0.159725	0.159725	0.331657
1112	SRGAP2-AS1	0.000978536	0.480865	0.480865	0.666513
1113	AC244021.1	-0.0199562	0.127555	0.127555	0.282977
1114	AL592494.1	0.00728764	2.57322e-25	2.57322e-25	1.80876e-23
1115	AC239800.2	0.00794299	8.07784e-25	8.07784e-25	2.9476e-23
1116	AC239800.3	0.0609934	0.341684	0.341684	0.542347
1117	AC239798.2	-0.00301263	7.73708e-06	7.73708e-06	4.83411e-05
1118	HIST2H3PS2	-0.00824533	0.519174	0.519174	0.698228
1119	FAM72C	0.0304289	0.33754	0.33754	0.538695
1120	AC245595.1	-0.0179269	0.795085	0.795085	0.886387
1121	PPIAL4E	0.00944974	1.01059e-16	1.01059e-16	1.10309e-15
1122	AC246785.3	0.0471681	0.626556	0.626556	0.779647
1123	NBPF15	-0.139218	0.103399	0.103399	0.243836
1124	FP700111.1	0.0304233	0.294324	0.294324	0.493544
1125	SRGAP2B	0.0343701	0.68733	0.68733	0.821511
1126	FAM72D	0.0214717	0.471872	0.471872	0.659327
1127	AC245014.3	-0.170114	0.00094365	0.00094365	0.00458696
1128	AC245014.1	-0.0179453	0.163919	0.163919	0.337404
1129	NBPF20	-0.0765876	0.0211196	0.0211196	0.0712825
1130	GPR89A	-0.25618	0.0023639	0.0023639	0.0105925
1131	PDZK1	0.0184268	4.28148e-25	4.28148e-25	2.07507e-23
1132	CD160	-0.0493343	0.247078	0.247078	0.443115
1133	RNF115	-0.170849	0.130785	0.130785	0.288266
1134	POLR3C	0.0918582	0.397954	0.397954	0.595686
1135	NUDT17	0.0679766	0.288494	0.288494	0.487516
1136	PIAS3	0.00622827	0.958406	0.958406	0.978913
1137	ANKRD35	-0.0575953	0.184628	0.184628	0.366191
1138	ITGA10	0.0772716	0.0595825	0.0595825	0.162922
1139	PEX11B	-0.134883	0.249468	0.249468	0.445751
1140	RBM8A	0.0221743	0.816299	0.816299	0.899561
1141	LIX1L-AS1	-0.00316429	3.61854e-07	3.61854e-07	2.51137e-06
1142	LIX1L	-0.116016	0.381293	0.381293	0.579627
1143	ANKRD34A	-0.0517501	0.0433527	0.0433527	0.127192
1144	AC243547.2	0.00823749	0.809148	0.809148	0.894872
1145	POLR3GL	-0.0393049	0.771616	0.771616	0.872315
1146	TXNIP	-0.0719342	0.425182	0.425182	0.621238
1147	NBPF10	0.0147719	0.729698	0.729698	0.84767
1148	AC239799.1	0.00172273	6.3587e-23	6.3587e-23	1.16756e-21
1149	NOTCH2NL	0.0168281	0.784187	0.784187	0.8797
1150	AC239799.2	0.0100839	5.68385e-14	5.68385e-14	5.51276e-13
1151	AC243756.1	-0.000258571	0.756658	0.756658	0.864101
1152	NBPF12	0.113706	0.213798	0.213798	0.404157
1153	PRKAB2	-0.00187888	0.9857	0.9857	0.992178
1154	AC242426.2	-0.039745	0.301871	0.301871	0.501158
1155	FMO5	-0.0335499	0.11631	0.11631	0.26532
1156	CHD1L	0.164828	0.199164	0.199164	0.385852
1157	LINC00624	-0.00629894	0.87057	0.87057	0.931528
1158	BCL9	0.0370337	0.63983	0.63983	0.789325
1159	ACP6	-0.128751	0.0263535	0.0263535	0.0852678
1160	GPR89B	-0.314323	0.00679728	0.00679728	0.0269661
1161	NBPF11	-0.116566	0.287106	0.287106	0.485986
1162	AC239809.3	-0.00050188	0.0176984	0.0176984	0.0616075
1163	PPIAL4G	-0.0242577	0.0662609	0.0662609	0.176526
1164	NBPF14	0.164825	0.00853291	0.00853291	0.0329865
1165	NUDT4B	0.00393079	0.908465	0.908465	0.953638
1166	PDE4DIP	0.0871367	0.117655	0.117655	0.267265
1167	AC239804.1	0.0687873	0.0931749	0.0931749	0.226144
1168	NBPF9	-0.0607852	0.182743	0.182743	0.363713
1169	AC245297.3	0.070536	0.516691	0.516691	0.696249
1170	AC245297.2	-0.0309686	0.1629	0.1629	0.335959
1171	NBPF19	0.00906159	0.885085	0.885085	0.940334
1172	PPIAL4C	-0.000361718	0.000222967	0.000222967	0.00119769
1173	FCGR1A	0.18578	0.000234387	0.000234387	0.00125635
1174	HIST2H2BF	0.104832	0.131228	0.131228	0.288989
1175	AC243772.2	-0.0194497	0.130548	0.130548	0.287891
1176	HIST2H3D	-0.0142349	0.269551	0.269551	0.467899
1177	HIST2H4A	0.00792027	0.743698	0.743698	0.856158
1178	HIST2H2AA3	0.0644315	0.0918582	0.0918582	0.223894
1179	AC239868.3	0.00977685	0.774893	0.774893	0.87431
1180	HIST2H2AA4	0.117218	0.0212314	0.0212314	0.0716119
1181	HIST2H3A	-0.0180669	0.161395	0.161395	0.333894
1182	HIST2H4B	-0.1214	0.00377613	0.00377613	0.0161641
1183	AC239868.2	-0.00911923	0.61595	0.61595	0.772281
1184	HIST2H2BE	0.0569195	0.206222	0.206222	0.395123
1185	HIST2H2AC	-0.109867	0.132381	0.132381	0.290954
1186	HIST2H2AB	0.121786	0.286687	0.286687	0.485595
1187	BOLA1	-0.0964664	0.227776	0.227776	0.420328
1188	SV2A	-0.0923389	0.00638577	0.00638577	0.0255253
1189	SF3B4	0.038509	0.731647	0.731647	0.84865
1190	MTMR11	0.0390702	0.000197213	0.000197213	0.00106716
1191	OTUD7B	-0.150575	0.0222074	0.0222074	0.0744236
1192	VPS45	0.00559925	0.955576	0.955576	0.977453
1193	PLEKHO1	0.18452	0.0125322	0.0125322	0.0458716
1194	ANP32E	0.0578074	0.682823	0.682823	0.818362
1195	APH1A	0.0991024	0.339222	0.339222	0.540148
1196	C1orf54	0.0856005	0.0921703	0.0921703	0.224383
1197	CIART	-0.0206053	0.0220774	0.0220774	0.0740613
1198	MRPS21	-0.00645619	0.947233	0.947233	0.973574
1199	PRPF3	-0.0932535	0.32494	0.32494	0.525373
1200	RPRD2	-0.223162	0.0792306	0.0792306	0.201979
1201	TARS2	0.0589892	0.589015	0.589015	0.752206
1202	ECM1	0.116047	0.00110826	0.00110826	0.00531045
1203	FALEC	-0.0536315	0.0609388	0.0609388	0.165693
1204	AL356356.1	-0.0209531	0.0181861	0.0181861	0.0630323
1205	ADAMTSL4	0.103675	1.41672e-07	1.41672e-07	1.00617e-06
1206	MCL1	-0.13618	0.0662423	0.0662423	0.1765
1207	ENSA	-0.170543	0.0936942	0.0936942	0.226985
1208	GOLPH3L	-0.0688306	0.313206	0.313206	0.513521
1209	HORMAD1	0.0302939	0.296253	0.296253	0.495382
1210	CTSS	0.124802	0.0248138	0.0248138	0.0814156
1211	CTSK	0.0108714	0.755023	0.755023	0.863362
1212	ARNT	0.235961	0.0326724	0.0326724	0.101689
1213	SETDB1	-0.222871	0.00721142	0.00721142	0.0283854
1214	CERS2	-0.10718	0.24284	0.24284	0.438216
1215	AL590133.1	-0.000646406	0.479782	0.479782	0.665624
1216	ANXA9	-0.000461184	0.971361	0.971361	0.985427
1217	MINDY1	0.0655041	0.259793	0.259793	0.45735
1218	PRUNE1	0.0714407	0.539513	0.539513	0.713929
1219	BNIPL	-0.0110348	0.389402	0.389402	0.587126
1220	C1orf56	-0.1308	0.00122418	0.00122418	0.00579958
1221	CDC42SE1	0.0913674	0.282469	0.282469	0.481665
1222	MLLT11	-0.103422	0.0028264	0.0028264	0.0124545
1223	GABPB2	-0.00564314	0.952772	0.952772	0.975867
1224	SEMA6C	0.00236979	0.00410192	0.00410192	0.0173884
1225	TNFAIP8L2	0.125509	0.123839	0.123839	0.276898
1226	SCNM1	0.000854109	0.993388	0.993388	0.99671
1227	LYSMD1	0.0506809	0.218966	0.218966	0.410836
1228	VPS72	0.0169751	0.884597	0.884597	0.939969
1229	PIP5K1A	-0.0594505	0.525645	0.525645	0.702794
1230	PSMD4	-0.0106131	0.891384	0.891384	0.943571
1231	AL391069.2	-0.0241551	0.20401	0.20401	0.392181
1232	ZNF687	-0.132238	0.0315995	0.0315995	0.0989472
1233	PI4KB	-0.125731	0.123263	0.123263	0.276013
1234	RFX5	0.167072	0.110813	0.110813	0.256288
1235	AL391069.1	0.0143825	0.270824	0.270824	0.469413
1236	AL391069.3	-0.00585742	0.883062	0.883062	0.939012
1237	SELENBP1	-0.0172158	1.64785e-25	1.64785e-25	1.80876e-23
1238	PSMB4	0.139118	0.111821	0.111821	0.2578
1239	POGZ	-0.174211	0.0632713	0.0632713	0.170527
1240	CGN	-0.0189213	0.149478	0.149478	0.317192
1241	TUFT1	-0.0211469	0.585456	0.585456	0.749548
1242	SNX27	-0.0484799	0.402453	0.402453	0.599831
1243	AL391335.1	0.0152577	0.62993	0.62993	0.782125
1244	RIIAD1	-0.00718325	1.69893e-25	1.69893e-25	1.80876e-23
1245	AL589765.7	-0.0311257	0.161551	0.161551	0.334119
1246	MRPL9	-0.293503	0.0171609	0.0171609	0.0600064
1247	OAZ3	0.124947	0.070222	0.070222	0.184661
1248	AL589765.4	0.0396437	0.563673	0.563673	0.731998
1249	TDRKH	0.0170481	0.843138	0.843138	0.916084
1250	TDRKH-AS1	-0.0436711	0.433188	0.433188	0.628358
1251	RORC	-0.0759018	0.317861	0.317861	0.518281
1252	C2CD4D	-0.0234264	0.544135	0.544135	0.717684
1253	THEM4	-0.192056	0.219203	0.219203	0.411062
1254	S100A10	0.183052	0.00636438	0.00636438	0.0254651
1255	S100A11	0.422649	2.08942e-06	2.08942e-06	1.36617e-05
1256	TCHH	0.0348063	2.82069e-15	2.82069e-15	2.88468e-14
1257	CRCT1	-0.00260783	6.19522e-08	6.19522e-08	4.49193e-07
1258	SPRR1A	0.00927724	4.16045e-22	4.16045e-22	6.78426e-21
1259	SPRR3	-0.00698109	4.19365e-06	4.19365e-06	2.6776e-05
1260	SPRR1B	0.000170757	0.464301	0.464301	0.653317
1261	SPRR2D	0.000886904	3.76456e-10	3.76456e-10	3.08814e-09
1262	SPRR2A	0.00828309	3.77618e-24	3.77618e-24	9.45502e-23
1263	SPRR2E	-0.000955588	2.94066e-06	2.94066e-06	1.90051e-05
1264	SPRR2F	-0.000908809	0.036296	0.036296	0.110487
1265	LOR	0.00625699	0.00204416	0.00204416	0.00926925
1266	PGLYRP4	0.00796581	1.81559e-25	1.81559e-25	1.80876e-23
1267	S100A9	0.290202	1.88058e-06	1.88058e-06	1.23404e-05
1268	S100A12	-0.255138	7.95269e-08	7.95269e-08	5.72287e-07
1269	S100A8	-0.0122004	0.843671	0.843671	0.916337
1270	S100A7	-0.000412882	0.614058	0.614058	0.770954
1271	BX470102.1	0.00555257	2.38227e-25	2.38227e-25	1.80876e-23
1272	S100A6	-0.0252726	0.718006	0.718006	0.840354
1273	S100A5	0.00810652	0.812436	0.812436	0.897223
1274	S100A4	-0.0611319	0.427274	0.427274	0.623197
1275	S100A3	0.0243099	2.09405e-22	2.09405e-22	3.55299e-21
1276	S100A2	-0.000716372	0.946525	0.946525	0.973045
1277	S100A16	-0.0193748	0.000210007	0.000210007	0.00113232
1278	S100A14	-0.0135138	6.0769e-11	6.0769e-11	5.15972e-10
1279	S100A13	0.0732413	0.0588319	0.0588319	0.161242
1280	S100A1	0.00152776	7.9414e-09	7.9414e-09	6.05498e-08
1281	AL162258.2	-0.0769889	0.317733	0.317733	0.518156
1282	CHTOP	-0.0714709	0.421416	0.421416	0.617836
1283	SNAPIN	0.0424558	0.670004	0.670004	0.810307
1284	ILF2	0.0351088	0.739704	0.739704	0.853661
1285	NPR1	-0.00478254	0.00903573	0.00903573	0.0346703
1286	INTS3	0.0792188	0.384637	0.384637	0.582578
1287	SLC27A3	0.208618	0.0229559	0.0229559	0.0765343
1288	GATAD2B	-0.184647	0.0633154	0.0633154	0.170623
1289	AL358472.5	-0.00993687	0.774539	0.774539	0.874144
1290	DENND4B	0.0140934	0.828485	0.828485	0.907321
1291	CRTC2	-0.119236	0.0726455	0.0726455	0.189296
1292	SLC39A1	0.120772	0.131657	0.131657	0.289745
1293	AL358472.4	-0.00518095	0.690512	0.690512	0.823894
1294	AL358472.3	0.00323242	0.00021431	0.00021431	0.00115428
1295	CREB3L4	0.048454	0.430414	0.430414	0.625916
1296	JTB	0.177358	0.0657574	0.0657574	0.17565
1297	AL358472.2	0.0267004	0.399777	0.399777	0.597126
1298	RAB13	0.336107	3.20572e-12	3.20572e-12	2.89162e-11
1299	RPS27	-0.201671	0.0189144	0.0189144	0.0650129
1300	NUP210L	0.0171435	0.58793	0.58793	0.751345
1301	TPM3	-0.0497501	0.506514	0.506514	0.687177
1302	C1orf189	-0.00803107	2.61274e-24	2.61274e-24	7.01358e-23
1303	C1orf43	-0.0710756	0.294079	0.294079	0.493371
1304	UBAP2L	0.0976399	0.241925	0.241925	0.437109
1305	HAX1	0.0405744	0.675936	0.675936	0.813941
1306	ATP8B2	-0.295946	0.0243636	0.0243636	0.0801729
1307	IL6R-AS1	0.0324577	0.000382508	0.000382508	0.00198983
1308	IL6R	0.0354164	0.374589	0.374589	0.5734
1309	SHE	0.00696873	1.06008e-24	1.06008e-24	3.55826e-23
1310	AL162591.2	0.0011602	0.0427633	0.0427633	0.125904
1311	UBE2Q1	-0.00962995	0.884321	0.884321	0.939755
1312	ADAR	0.146968	0.125588	0.125588	0.279817
1313	KCNN3	0.0219279	2.82835e-22	2.82835e-22	4.73101e-21
1314	PMVK	0.034914	0.767501	0.767501	0.870155
1315	AL451085.1	-0.0337868	0.406653	0.406653	0.603809
1316	PBXIP1	-0.593501	0.000606617	0.000606617	0.0030545
1317	PYGO2	-0.346652	0.00273579	0.00273579	0.0120945
1318	AL451085.2	-0.0556109	0.0300499	0.0300499	0.0949227
1319	SHC1	0.0249253	0.764919	0.764919	0.868356
1320	CKS1B	0.224594	0.108562	0.108562	0.252398
1321	FLAD1	0.0200353	0.865062	0.865062	0.928033
1322	ZBTB7B	0.0485362	0.502149	0.502149	0.684117
1323	DCST1	0.0205418	0.478205	0.478205	0.664035
1324	DCST1-AS1	-0.0249465	0.0545887	0.0545887	0.152122
1325	ADAM15	-0.00681353	0.925252	0.925252	0.962844
1326	EFNA4	-0.00262641	0.965907	0.965907	0.982967
1327	EFNA3	0.0362541	0.211051	0.211051	0.400736
1328	EFNA1	0.017735	0.540807	0.540807	0.71503
1329	SLC50A1	-0.0388415	0.624202	0.624202	0.778165
1330	DPM3	-0.0290333	0.72497	0.72497	0.844747
1331	KRTCAP2	0.152706	0.112538	0.112538	0.258978
1332	TRIM46	-0.0453698	0.418929	0.418929	0.615625
1333	MUC1	0.0256169	0.485771	0.485771	0.670622
1334	AC234582.1	-0.00886333	0.829551	0.829551	0.907995
1335	THBS3	-0.0305796	0.623383	0.623383	0.77759
1336	MTX1	-0.0652814	0.336835	0.336835	0.538262
1337	AC234582.2	0.00817041	6.80508e-25	6.80508e-25	2.63121e-23
1338	GBA	0.109123	0.0492774	0.0492774	0.140475
1339	FAM189B	-0.0544489	0.453637	0.453637	0.644824
1340	SCAMP3	0.121213	0.297323	0.297323	0.496799
1341	CLK2	-0.0308647	0.691563	0.691563	0.824659
1342	HCN3	0.0459323	0.149443	0.149443	0.317151
1343	FDPS	-0.0159294	0.886832	0.886832	0.94118
1344	RUSC1-AS1	0.0670734	0.17166	0.17166	0.349083
1345	RUSC1	-0.00404945	0.966205	0.966205	0.983006
1346	ASH1L	-0.159714	0.0840078	0.0840078	0.210475
1347	ASH1L-AS1	0.149821	0.175341	0.175341	0.354311
1348	AL353807.2	-0.0181387	0.156602	0.156602	0.327267
1349	MSTO1	-0.0969296	0.152911	0.152911	0.322131
1350	YY1AP1	-0.201357	0.024893	0.024893	0.081581
1351	DAP3	-0.330762	0.000146056	0.000146056	0.000803228
1352	GON4L	-0.263713	0.0145762	0.0145762	0.0522033
1353	SYT11	0.0888287	0.52238	0.52238	0.700592
1354	RIT1	0.00438878	0.939429	0.939429	0.969161
1355	KHDC4	-0.271423	0.00136535	0.00136535	0.00642595
1356	ARHGEF2	-0.0195791	0.730005	0.730005	0.84787
1357	AL355388.2	0.00762022	1.58955e-24	1.58955e-24	4.70685e-23
1358	AL355388.1	0.0199188	1.30354e-23	1.30354e-23	2.76466e-22
1359	SSR2	-0.155422	0.106056	0.106056	0.24821
1360	UBQLN4	-0.142167	0.0238072	0.0238072	0.0786763
1361	LAMTOR2	0.252063	0.00233932	0.00233932	0.0104894
1362	RAB25	-0.0132902	4.04347e-05	4.04347e-05	0.000236951
1363	MEX3A	0.00185198	2.75719e-24	2.75719e-24	7.27506e-23
1364	LMNA	-0.00388737	0.950533	0.950533	0.974874
1365	SEMA4A	0.0291902	0.372657	0.372657	0.571477
1366	SLC25A44	-0.080335	0.218673	0.218673	0.41044
1367	PMF1-BGLAP	-0.0212486	0.803789	0.803789	0.892181
1368	PMF1	-0.00439008	0.96171	0.96171	0.980744
1369	BGLAP	0.0404292	0.36678	0.36678	0.566348
1370	PAQR6	-0.0619209	0.352077	0.352077	0.551979
1371	SMG5	-0.269796	0.00307244	0.00307244	0.0133885
1372	TMEM79	-0.188721	0.0182185	0.0182185	0.0631119
1373	GLMP	0.21094	0.000583539	0.000583539	0.0029479
1374	CCT3	-0.0970857	0.370308	0.370308	0.569241
1375	TSACC	0.00951812	8.45129e-25	8.45129e-25	3.02621e-23
1376	C1orf61	-0.0421597	0.442264	0.442264	0.636064
1377	AL139412.1	-0.0124844	0.329178	0.329178	0.529858
1378	MEF2D	0.0595163	0.388655	0.388655	0.586219
1379	IQGAP3	-0.0519878	0.317337	0.317337	0.517846
1380	TTC24	-0.232892	0.00202064	0.00202064	0.009175
1381	NAXE	0.0686974	0.506031	0.506031	0.687078
1382	GPATCH4	-0.01929	0.850287	0.850287	0.920122
1383	BCAN	-0.0118319	0.355059	0.355059	0.554601
1384	AL590666.2	0.0219588	0.487778	0.487778	0.671809
1385	NES	0.0254744	1.79021e-24	1.79021e-24	5.12944e-23
1386	CRABP2	-0.0159385	0.303275	0.303275	0.502692
1387	ISG20L2	-0.07948	0.393372	0.393372	0.59116
1388	RRNAD1	-0.123387	0.0580919	0.0580919	0.159584
1389	MRPL24	0.220384	0.0153166	0.0153166	0.0545439
1390	HDGF	0.150068	0.0189269	0.0189269	0.0650393
1391	PRCC	-0.0717827	0.441144	0.441144	0.635134
1392	SH2D2A	-0.0382818	0.856268	0.856268	0.923216
1393	NTRK1	-0.0395087	0.123433	0.123433	0.276333
1394	LRRC71	-0.00969711	6.49822e-25	6.49822e-25	2.53695e-23
1395	ARHGEF11	0.0713757	0.124058	0.124058	0.277238
1396	ETV3L	0.0362596	6.90019e-20	6.90019e-20	9.03224e-19
1397	ETV3	0.042243	0.450049	0.450049	0.641933
1398	FCRL5	0.0487111	0.257666	0.257666	0.455182
1399	FCRL4	-0.000810842	1.76619e-11	1.76619e-11	1.53462e-10
1400	FCRL3	0.00422086	0.951514	0.951514	0.975319
1401	FCRL2	0.0120207	3.11571e-12	3.11571e-12	2.81548e-11
1402	FCRL1	-0.0015857	0.208845	0.208845	0.398505
1403	CD5L	0.0251897	1.48618e-23	1.48618e-23	3.11912e-22
1404	CD1D	0.0477874	1.26455e-05	1.26455e-05	7.75392e-05
1405	AL138899.1	0.0130661	1.68186e-25	1.68186e-25	1.80876e-23
1406	CD1A	0.0242489	0.198744	0.198744	0.385314
1407	CD1C	0.0120394	0.45939	0.45939	0.649272
1408	CD1B	0.0857682	0.0373539	0.0373539	0.112911
1409	CD1E	-0.00886617	0.626619	0.626619	0.779674
1410	SPTA1	0.00550356	2.32799e-25	2.32799e-25	1.80876e-23
1411	OR6N1	0.0197932	0.400508	0.400508	0.597952
1412	MNDA	0.00135346	0.972759	0.972759	0.986012
1413	PYHIN1	-0.602386	0.00206997	0.00206997	0.00938418
1414	IFI16	-0.12398	0.225766	0.225766	0.418338
1415	AIM2	-0.0294138	0.766827	0.766827	0.869687
1416	FCER1A	-0.0197945	0.275087	0.275087	0.473577
1417	OR10J1	0.00149509	2.21444e-17	2.21444e-17	2.51545e-16
1418	DUSP23	0.117633	0.0813422	0.0813422	0.205638
1419	FCRL6	0.0158877	0.815599	0.815599	0.89922
1420	SLAMF8	0.289394	6.85994e-08	6.85994e-08	4.96315e-07
1421	AL590560.1	0.0321191	0.312374	0.312374	0.512618
1422	VSIG8	-0.0382171	0.052874	0.052874	0.148582
1423	AL590560.2	-0.0127289	0.482869	0.482869	0.668082
1424	CFAP45	-0.0347744	0.00740052	0.00740052	0.0290558
1425	TAGLN2	0.198007	0.0145018	0.0145018	0.0519739
1426	IGSF9	0.009971	1.54421e-12	1.54421e-12	1.40999e-11
1427	SLAMF9	0.115283	0.000119564	0.000119564	0.000663894
1428	LINC01133	0.00519882	5.68694e-23	5.68694e-23	1.04997e-21
1429	KCNJ10	0.0115249	3.21541e-25	3.21541e-25	1.88249e-23
1430	PIGM	0.110413	0.266494	0.266494	0.464671
1431	IGSF8	-0.132284	0.288891	0.288891	0.487777
1432	ATP1A4	0.0182291	5.9777e-20	5.9777e-20	7.86568e-19
1433	CASQ1	-0.00265041	0.836337	0.836337	0.912635
1434	AL121987.2	0.022249	2.44081e-19	2.44081e-19	3.06526e-18
1435	PEA15	0.222217	2.53129e-05	2.53129e-05	0.000151066
1436	DCAF8	-0.292596	0.00732476	0.00732476	0.0287977
1437	AL139011.2	-0.0146139	0.419703	0.419703	0.616097
1438	AL139011.1	-0.11602	0.106535	0.106535	0.249011
1439	PEX19	-0.0409849	0.645408	0.645408	0.792995
1440	COPA	-0.0980355	0.238237	0.238237	0.432505
1441	NCSTN	0.0587947	0.455023	0.455023	0.645835
1442	NHLH1	-0.0117787	5.03703e-06	5.03703e-06	3.19478e-05
1443	VANGL2	0.00202119	4.88016e-12	4.88016e-12	4.36091e-11
1444	SLAMF6	-0.243088	0.132238	0.132238	0.290735
1445	CD84	0.117758	0.0669439	0.0669439	0.177876
1446	SLAMF1	-0.00382311	0.969378	0.969378	0.984708
1447	AL121985.1	0.0129978	0.764891	0.764891	0.868356
1448	CD48	-0.332695	1.47662e-05	1.47662e-05	8.9852e-05
1449	SLAMF7	0.322864	4.09506e-07	4.09506e-07	2.83231e-06
1450	LY9	-0.139771	0.305261	0.305261	0.50461
1451	CD244	0.00793684	0.93093	0.93093	0.965248
1452	ITLN1	0.00729916	3.78103e-18	3.78103e-18	4.46135e-17
1453	F11R	0.11622	0.00886615	0.00886615	0.0341303
1454	AL591806.3	0.0185857	0.557095	0.557095	0.727063
1455	TSTD1	0.127745	0.206189	0.206189	0.395123
1456	USF1	0.0231526	0.806499	0.806499	0.893759
1457	ARHGAP30	-0.0341649	0.714995	0.714995	0.838416
1458	NECTIN4	-0.00149694	0.90795	0.90795	0.953475
1459	AL591806.1	0.0261885	2.06528e-24	2.06528e-24	5.76731e-23
1460	KLHDC9	0.0386741	0.247913	0.247913	0.444216
1461	PFDN2	-0.00339443	0.968888	0.968888	0.984443
1462	NIT1	0.0145135	0.867058	0.867058	0.929029
1463	DEDD	-0.16781	0.0512838	0.0512838	0.145043
1464	UFC1	-0.320946	0.000245411	0.000245411	0.0013116
1465	AL590714.1	-0.0345618	0.119033	0.119033	0.269485
1466	USP21	-0.0259257	0.82904	0.82904	0.907584
1467	PPOX	0.0692569	0.453955	0.453955	0.645079
1468	B4GALT3	-0.252773	0.0273871	0.0273871	0.0880389
1469	ADAMTS4	-0.0564271	0.027441	0.027441	0.0881779
1470	NDUFS2	0.0132965	0.89987	0.89987	0.947911
1471	FCER1G	0.533367	1.17848e-11	1.17848e-11	1.03289e-10
1472	APOA2	0.0180694	0.533094	0.533094	0.708743
1473	TOMM40L	0.00781701	0.885194	0.885194	0.940334
1474	NR1I3	-0.00423549	2.84193e-12	2.84193e-12	2.57387e-11
1475	PCP4L1	-0.00711149	7.30595e-25	7.30595e-25	2.74667e-23
1476	MPZ	-0.0282834	0.462823	0.462823	0.651967
1477	SDHC	-0.0427235	0.637838	0.637838	0.788367
1478	CFAP126	-0.0292677	0.0202762	0.0202762	0.0689104
1479	AL592295.4	0.053753	0.393912	0.393912	0.591637
1480	AL831711.1	0.0233576	4.48396e-25	4.48396e-25	2.10266e-23
1481	FCGR2A	0.220875	9.70213e-06	9.70213e-06	6.01885e-05
1482	HSPA6	-0.114652	0.0164011	0.0164011	0.0577412
1483	FCGR3A	0.183325	0.00115285	0.00115285	0.00549401
1484	FCGR3B	-0.0934563	0.0114226	0.0114226	0.0424908
1485	FCGR2B	0.10268	0.00609972	0.00609972	0.0245872
1486	AL451067.1	-0.0160578	0.209365	0.209365	0.398816
1487	FCRLA	-0.00101639	0.897474	0.897474	0.946906
1488	FCRLB	0.0362504	0.32705	0.32705	0.5277
1489	DUSP12	-0.49638	2.45673e-05	2.45673e-05	0.00014666
1490	AL359541.1	0.00324518	0.844271	0.844271	0.916473
1491	ATF6	-0.114677	0.0508282	0.0508282	0.143998
1492	OLFML2B	0.0834701	7.50582e-05	7.50582e-05	0.00042715
1493	AL590408.1	0.0239444	5.85371e-25	5.85371e-25	2.41178e-23
1494	NOS1AP	0.0188173	0.545524	0.545524	0.718526
1495	C1orf226	-0.0179924	0.160186	0.160186	0.332408
1496	SH2D1B	0.0408103	0.702691	0.702691	0.831272
1497	UHMK1	-0.0228461	0.850136	0.850136	0.920008
1498	AL596325.1	0.0203704	0.52047	0.52047	0.698803
1499	UAP1	-0.0212365	0.795554	0.795554	0.886663
1500	DDR2	-0.0505986	0.246252	0.246252	0.442146
1501	HSD17B7	-0.36116	0.00118505	0.00118505	0.00563011
1502	CCDC190	-0.0131818	7.33411e-21	7.33411e-21	1.03335e-19
1503	RGS4	0.000392043	0.310205	0.310205	0.5101
1504	RGS5	0.00126923	1.18238e-05	1.18238e-05	7.27003e-05
1505	RGS5-1	-0.0551709	0.0542055	0.0542055	0.15139
1506	NUF2	-0.129604	0.288183	0.288183	0.487154
1507	PBX1	0.00486821	1.85887e-19	1.85887e-19	2.35356e-18
1508	AL356441.1	-0.021307	0.0975	0.0975	0.233707
1509	MGST3	0.206416	0.0018528	0.0018528	0.00849216
1510	ALDH9A1	0.00397273	0.97064	0.97064	0.985144
1511	TMCO1	0.0504764	0.601779	0.601779	0.761589
1512	AL451074.2	-1.1453e-05	0.997415	0.997415	0.998653
1513	UCK2	-0.0813254	0.309225	0.309225	0.509029
1514	AL358115.1	0.0113268	6.16978e-21	6.16978e-21	8.76057e-20
1515	LINC01675	-0.0235245	0.19346	0.19346	0.378082
1516	POGK	-0.0115784	0.894415	0.894415	0.945236
1517	TADA1	-0.0359874	0.757182	0.757182	0.864455
1518	ILDR2	0.107035	0.0773216	0.0773216	0.198446
1519	GPA33	0.0620128	0.148663	0.148663	0.316044
1520	LINC01363	0.00476131	1.18597e-21	1.18597e-21	1.84133e-20
1521	AL451050.2	-0.0242764	0.176682	0.176682	0.356163
1522	POU2F1	-0.117951	0.0120437	0.0120437	0.0443336
1523	CD247	-0.370622	0.0711449	0.0711449	0.186257
1524	AL359962.2	-0.189889	7.20041e-05	7.20041e-05	0.000410816
1525	CREG1	0.319033	2.78045e-10	2.78045e-10	2.2902e-09
1526	AL031733.2	-0.0144859	0.424436	0.424436	0.620814
1527	RCSD1	0.198356	0.156819	0.156819	0.327415
1528	MPZL1	0.0482572	0.132342	0.132342	0.290932
1529	ADCY10	0.0112988	1.71952e-24	1.71952e-24	4.96021e-23
1530	Z99943.1	0.00315788	0.0560954	0.0560954	0.155437
1531	MPC2	-0.284876	0.00285332	0.00285332	0.0125589
1532	DCAF6	0.0311551	0.708199	0.708199	0.834206
1533	GPR161	-0.00456777	0.741265	0.741265	0.854697
1534	TIPRL	-0.170471	0.0566004	0.0566004	0.15647
1535	SFT2D2	0.260118	0.0197959	0.0197959	0.0675521
1536	TBX19	0.00669138	0.861871	0.861871	0.926276
1537	XCL2	-0.43097	0.000114669	0.000114669	0.000638653
1538	XCL1	-0.447538	0.000335445	0.000335445	0.00175728
1539	ATP1B1	-0.0160865	0.674834	0.674834	0.813295
1540	NME7	-0.122806	0.217987	0.217987	0.409611
1541	BLZF1	0.0881443	0.286341	0.286341	0.485346
1542	CCDC181	0.0236934	0.415335	0.415335	0.612224
1543	SLC19A2	-0.0178906	0.671708	0.671708	0.811425
1544	AL021068.1	0.00779027	2.92662e-20	2.92662e-20	3.93597e-19
1545	F5	-0.0181532	0.840207	0.840207	0.91461
1546	SELP	-0.0374306	0.143675	0.143675	0.308823
1547	C1orf112	-0.12198	0.29343	0.29343	0.492627
1548	SELL	0.183317	0.148199	0.148199	0.315278
1549	METTL18	-0.236463	0.0303946	0.0303946	0.0956808
1550	SCYL3	-0.138398	0.224214	0.224214	0.416424
1551	KIFAP3	0.090776	0.462139	0.462139	0.651589
1552	AL354732.1	0.000469591	0.696846	0.696846	0.827932
1553	GORAB	0.0134464	0.883238	0.883238	0.939034
1554	MROH9	-0.00737786	0.000287652	0.000287652	0.00152479
1555	FMO3	-0.0045021	1.74617e-19	1.74617e-19	2.21504e-18
1556	FMO2	0.00790501	1.3303e-12	1.3303e-12	1.21799e-11
1557	AL021026.1	0.00385111	6.23881e-25	6.23881e-25	2.47411e-23
1558	FMO1	0.00157138	1.35464e-05	1.35464e-05	8.28359e-05
1559	FMO4	0.0812729	0.124533	0.124533	0.278081
1560	PRRC2C	-0.266738	0.00352346	0.00352346	0.0151827
1561	MYOCOS	0.0339187	0.241555	0.241555	0.436686
1562	VAMP4	-0.227369	0.0312723	0.0312723	0.0979989
1563	METTL13	-0.105037	0.317449	0.317449	0.517945
1564	DNM3	-0.0521044	0.0689337	0.0689337	0.182007
1565	PIGC	0.055125	0.695329	0.695329	0.827245
1566	SUCO	-0.231486	0.0113752	0.0113752	0.04233
1567	FASLG	-0.215953	0.0932487	0.0932487	0.226241
1568	TNFSF18	0.00561292	2.77661e-12	2.77661e-12	2.51584e-11
1569	TNFSF4	-0.0683033	0.318926	0.318926	0.518896
1570	AL645568.1	-0.0399468	0.464985	0.464985	0.653959
1571	PRDX6	0.0714996	0.446786	0.446786	0.639229
1572	ANKRD45	-0.0276174	0.0879185	0.0879185	0.217268
1573	KLHL20	-0.109632	0.262942	0.262942	0.461036
1574	CENPL	-0.261156	0.00217502	0.00217502	0.00981836
1575	DARS2	0.029756	0.677843	0.677843	0.815023
1576	GAS5-AS1	0.0202732	0.12476	0.12476	0.278466
1577	ZBTB37	-0.0591234	0.347909	0.347909	0.547859
1578	RC3H1	-0.0875942	0.32881	0.32881	0.52958
1579	AL121983.1	0.0134721	0.662823	0.662823	0.80569
1580	AL121983.2	0.045922	0.57603	0.57603	0.74194
1581	RABGAP1L	-0.472752	0.000674458	0.000674458	0.00337581
1582	GPR52	-0.0114084	4.97999e-23	4.97999e-23	9.28827e-22
1583	Z99127.1	0.00302294	0.00105476	0.00105476	0.00507744
1584	CACYBP	0.022004	0.838938	0.838938	0.914424
1585	MRPS14	0.12155	0.198997	0.198997	0.385641
1586	KIAA0040	-0.408117	0.000528303	0.000528303	0.00269458
1587	TNR	-0.00560713	6.81844e-14	6.81844e-14	6.58778e-13
1588	AL513329.1	0.00166104	0.000707131	0.000707131	0.00352444
1589	COP1	0.0119206	0.886104	0.886104	0.941041
1590	AL590723.1	-0.00842054	0.510338	0.510338	0.690316
1591	AL359265.3	0.0183679	0.678114	0.678114	0.815293
1592	SEC16B	0.00129123	2.75181e-05	2.75181e-05	0.000163643
1593	RASAL2-AS1	0.0244072	0.0393509	0.0393509	0.117824
1594	RASAL2	0.0571697	0.0303423	0.0303423	0.0955611
1595	CLEC20A	0.00292964	1.66437e-25	1.66437e-25	1.80876e-23
1596	C1orf220	0.00351207	0.176824	0.176824	0.356378
1597	AL137796.1	0.00643172	1.86962e-25	1.86962e-25	1.80876e-23
1598	AL449106.1	0.000330743	0.431097	0.431097	0.626545
1599	RALGPS2	-0.120707	0.0333547	0.0333547	0.10346
1600	FAM20B	0.0349651	0.63225	0.63225	0.783912
1601	TOR3A	-0.125687	0.23152	0.23152	0.424412
1602	ABL2	0.170128	5.74647e-05	5.74647e-05	0.000331816
1603	SOAT1	0.137152	0.0346091	0.0346091	0.106562
1604	AXDND1	0.0334861	0.29237	0.29237	0.491464
1605	TOR1AIP2	-0.0843291	0.258389	0.258389	0.455808
1606	AL353708.3	-0.0414466	0.416212	0.416212	0.613247
1607	TOR1AIP1	-0.21803	0.0133872	0.0133872	0.0485414
1608	AL353708.1	-0.00450289	0.896046	0.896046	0.946015
1609	CEP350	0.0972093	0.381302	0.381302	0.579627
1610	QSOX1	0.155748	0.0019064	0.0019064	0.00870744
1611	LHX4	0.00380038	1.88025e-09	1.88025e-09	1.4802e-08
1612	ACBD6	-0.154321	0.0691784	0.0691784	0.182461
1613	XPR1	-0.10603	0.245163	0.245163	0.440662
1614	KIAA1614	0.0844795	0.0396387	0.0396387	0.118474
1615	AL162431.2	-0.00736269	0.840172	0.840172	0.91461
1616	KIAA1614-AS1	0.0209788	0.492606	0.492606	0.676017
1617	STX6	-0.148807	0.0233186	0.0233186	0.0775462
1618	MR1	-0.0404752	0.591514	0.591514	0.754216
1619	IER5	-0.0316981	0.51998	0.51998	0.698659
1620	LINC01732	0.00295727	0.0328189	0.0328189	0.102113
1621	CACNA1E	-0.0178991	1.40123e-16	1.40123e-16	1.5204e-15
1622	LINC01344	-0.00943477	1.47031e-15	1.47031e-15	1.51833e-14
1623	GLUL	0.136961	0.0102679	0.0102679	0.038791
1624	RNASEL	0.0381698	0.618222	0.618222	0.774164
1625	RGS16	-0.122535	0.394264	0.394264	0.591882
1626	LINC01686	0.00498812	0.00568514	0.00568514	0.0231013
1627	NPL	0.143013	3.00614e-05	3.00614e-05	0.000178031
1628	DHX9	-0.182746	0.0492941	0.0492941	0.140483
1629	LAMC1	0.0412583	4.15811e-16	4.15811e-16	4.41643e-15
1630	LAMC2	-0.0205932	0.110806	0.110806	0.256288
1631	NMNAT2	-0.00145752	0.000739027	0.000739027	0.00367339
1632	SMG7	-0.2302	0.00117768	0.00117768	0.00560169
1633	NCF2	0.200223	4.56272e-06	4.56272e-06	2.9031e-05
1634	ARPC5	0.208839	0.00448828	0.00448828	0.0188003
1635	RGL1	0.129649	0.000257166	0.000257166	0.00137078
1636	APOBEC4	-0.00970323	1.88819e-25	1.88819e-25	1.80876e-23
1637	COLGALT2	-0.0771316	0.263112	0.263112	0.461295
1638	TSEN15	-0.196807	0.160265	0.160265	0.332461
1639	AL445228.2	0.0342089	0.237999	0.237999	0.432238
1640	C1orf21	0.107093	0.248565	0.248565	0.444858
1641	EDEM3	-0.089875	0.318131	0.318131	0.518511
1642	FAM129A	-0.250828	0.00141367	0.00141367	0.00662949
1643	RNF2	-0.11273	0.0989428	0.0989428	0.235956
1644	TRMT1L	0.0850139	0.365787	0.365787	0.565471
1645	SWT1	-0.00806707	0.909077	0.909077	0.954011
1646	IVNS1ABP	-0.387101	7.70314e-11	7.70314e-11	6.49389e-10
1647	AL078644.2	-0.0530271	0.00112927	0.00112927	0.00539699
1648	HMCN1	0.0123657	2.97981e-25	2.97981e-25	1.86565e-23
1649	TPR	-0.304605	0.0043935	0.0043935	0.018461
1650	ODR4	-0.0550706	0.455762	0.455762	0.64645
1651	OCLM	0.00539523	0.677849	0.677849	0.815023
1652	PTGS2	0.137969	0.00194815	0.00194815	0.00888199
1653	PACERR	0.00491461	0.0192123	0.0192123	0.06584
1654	PLA2G4A	0.0316272	0.0270176	0.0270176	0.0871236
1655	ERVMER61-1	-0.0030242	0.868144	0.868144	0.929658
1656	RGS18	-0.0873644	0.00200328	0.00200328	0.00910854
1657	AL390957.1	0.00438728	0.928772	0.928772	0.964162
1658	AL136987.1	-0.000806222	0.982658	0.982658	0.990803
1659	RGS1	-0.0494641	0.651455	0.651455	0.797307
1660	RGS13	-0.0110415	0.693635	0.693635	0.826149
1661	AL136454.1	-0.439844	2.56649e-05	2.56649e-05	0.000153076
1662	RGS2	-0.199366	4.70068e-05	4.70068e-05	0.000273472
1663	UCHL5	0.170249	0.19744	0.19744	0.383681
1664	TROVE2	-0.0323731	0.78008	0.78008	0.876952
1665	GLRX2	0.0674388	0.319682	0.319682	0.519732
1666	CDC73	-0.0863858	0.392414	0.392414	0.590074
1667	B3GALT2	-0.0360353	0.555517	0.555517	0.725981
1668	LINC01031	-0.00959765	0.597002	0.597002	0.758156
1669	CFH	-0.0439658	0.488585	0.488585	0.672275
1670	ASPM	-0.100305	0.415846	0.415846	0.612842
1671	ZBTB41	0.143326	0.123965	0.123965	0.277093
1672	DENND1B	0.0531922	0.626317	0.626317	0.77948
1673	C1orf53	0.0253338	0.193886	0.193886	0.378841
1674	NEK7	-0.282298	0.000819965	0.000819965	0.00403678
1675	ATP6V1G3	0.0300715	0.299027	0.299027	0.498684
1676	PTPRC	-0.327645	0.000280119	0.000280119	0.00148721
1677	AL157402.2	-0.0284081	0.768905	0.768905	0.870794
1678	MIR181A1HG	0.0878146	0.324637	0.324637	0.525113
1679	NR5A2	0.0272618	0.636237	0.636237	0.786872
1680	LINC00862	-0.00778515	9.18114e-20	9.18114e-20	1.18864e-18
1681	AC104461.1	0.0270014	0.351128	0.351128	0.551071
1682	ZNF281	-0.120336	0.0988105	0.0988105	0.235752
1683	AL359834.1	0.00444713	0.896264	0.896264	0.946195
1684	KIF14	-0.157591	0.0495822	0.0495822	0.141164
1685	DDX59	0.221043	0.0370816	0.0370816	0.112326
1686	AL445483.1	-0.0025317	0.84392	0.84392	0.916426
1687	CAMSAP2	0.0929172	0.0285865	0.0285865	0.0912463
1688	GPR25	-0.568898	9.82645e-06	9.82645e-06	6.0941e-05
1689	INAVA	-0.0201491	0.528094	0.528094	0.70457
1690	KIF21B	-0.367989	0.000349254	0.000349254	0.00182772
1691	AL358473.1	0.0382072	0.187691	0.187691	0.370299
1692	ASCL5	-0.00912191	0.475758	0.475758	0.662024
1693	TMEM9	-0.0851383	0.378348	0.378348	0.576687
1694	IGFN1	0.00318624	1.32741e-15	1.32741e-15	1.37359e-14
1695	PKP1	-0.00561717	9.25429e-12	9.25429e-12	8.1644e-11
1696	TNNT2	0.00225246	0.861212	0.861212	0.925766
1697	LAD1	0.0392119	0.213434	0.213434	0.403774
1698	AC119427.1	-0.00394133	0.705595	0.705595	0.832884
1699	TNNI1	0.00732299	3.47839e-24	3.47839e-24	8.80812e-23
1700	PHLDA3	-0.0045393	0.867846	0.867846	0.929617
1701	CSRP1	-0.135744	0.134616	0.134616	0.29429
1702	AC096677.1	-0.0485455	0.147627	0.147627	0.314359
1703	NAV1	0.0487915	0.00214666	0.00214666	0.00969686
1704	IPO9-AS1	-0.0815409	0.174471	0.174471	0.353039
1705	IPO9	0.158014	0.176244	0.176244	0.355631
1706	SHISA4	-0.016377	0.67907	0.67907	0.816248
1707	TIMM17A	-0.0921265	0.186248	0.186248	0.368283
1708	RNPEP	0.0673188	0.370932	0.370932	0.569842
1709	AC099676.1	-0.000577467	0.000915732	0.000915732	0.00446453
1710	ELF3-AS1	-0.00962184	7.46827e-24	7.46827e-24	1.69669e-22
1711	ELF3	-0.0594041	2.26359e-10	2.26359e-10	1.87445e-09
1712	GPR37L1	-0.00164878	1.01042e-09	1.01042e-09	8.07451e-09
1713	ARL8A	0.0922396	0.0804207	0.0804207	0.204083
1714	PTPN7	-0.492988	0.000145191	0.000145191	0.000799567
1715	UBE2T	-0.0990096	0.461559	0.461559	0.651052
1716	PPP1R12B	-0.0296849	0.724809	0.724809	0.844642
1717	SYT2	0.0595883	0.0406487	0.0406487	0.120953
1718	AC104463.2	0.00369217	3.49855e-24	3.49855e-24	8.84055e-23
1719	KDM5B	-0.0631396	0.541997	0.541997	0.715945
1720	AC098934.4	0.000805983	0.00598039	0.00598039	0.0241595
1721	PCAT6	-0.0173704	0.769743	0.769743	0.871351
1722	RABIF	-0.0608651	0.5147	0.5147	0.694488
1723	KLHL12	-0.0158464	0.848387	0.848387	0.918795
1724	ADIPOR1	-0.000124161	0.998593	0.998593	0.999189
1725	CYB5R1	0.115645	0.106027	0.106027	0.24817
1726	TMEM183A	-0.0297888	0.750939	0.750939	0.860666
1727	PPFIA4	0.0421015	0.18505	0.18505	0.366743
1728	MYBPH	0.0745046	0.0757473	0.0757473	0.195378
1729	CHI3L1	0.1352	0.004719	0.004719	0.0196074
1730	CHIT1	0.0883689	0.0237332	0.0237332	0.0784964
1731	LINC01353	-0.00906455	0.792287	0.792287	0.884873
1732	LINC01136	-0.00891071	0.846206	0.846206	0.917266
1733	BTG2	-0.117368	0.121215	0.121215	0.272642
1734	ATP2B4	-0.450002	0.00317499	0.00317499	0.0137995
1735	LAX1	-0.581902	8.72825e-07	8.72825e-07	5.89289e-06
1736	ZC3H11A	-0.059619	0.554065	0.554065	0.724995
1737	ZBED6	-0.0975072	0.0603765	0.0603765	0.164582
1738	SNRPE	0.138098	0.144955	0.144955	0.31076
1739	LINC00303	0.0116374	9.71585e-15	9.71585e-15	9.77713e-14
1740	SOX13	0.0227988	0.507938	0.507938	0.688134
1741	ETNK2	-0.0488477	0.0582895	0.0582895	0.159996
1742	KISS1	0.00995345	2.58407e-19	2.58407e-19	3.23507e-18
1743	GOLT1A	-0.0109034	6.18495e-13	6.18495e-13	5.75982e-12
1744	PLEKHA6	0.0391773	0.177635	0.177635	0.357619
1745	LINC00628	0.00340966	7.44693e-19	7.44693e-19	9.09095e-18
1746	PPP1R15B	-0.0798281	0.149184	0.149184	0.316804
1747	PIK3C2B	-0.119419	0.090175	0.090175	0.220943
1748	MDM4	-0.129132	0.123786	0.123786	0.276847
1749	AL512306.3	-0.00687945	4.89111e-21	4.89111e-21	7.01431e-20
1750	AL512306.2	0.0374356	0.383237	0.383237	0.581405
1751	NFASC	-0.00209103	4.69015e-11	4.69015e-11	3.99915e-10
1752	CNTN2	0.015441	0.62546	0.62546	0.779002
1753	TMEM81	0.0279009	0.359633	0.359633	0.559517
1754	RBBP5	0.0260122	0.80251	0.80251	0.891358
1755	DSTYK	-0.239789	0.00558654	0.00558654	0.0227646
1756	TMCC2	0.0150515	0.760632	0.760632	0.866131
1757	NUAK2	0.090079	0.0678776	0.0678776	0.179761
1758	LEMD1	0		1
1759	CDK18	-0.0156331	0.529044	0.529044	0.705508
1760	MFSD4A	-0.0436597	0.0865302	0.0865302	0.215079
1761	ELK4	-0.283713	0.00438757	0.00438757	0.0184399
1762	SLC45A3	0.0216902	0.0124091	0.0124091	0.0454871
1763	NUCKS1	-0.0383832	0.724361	0.724361	0.844436
1764	RAB29	-0.124213	0.262794	0.262794	0.460939
1765	SLC41A1	-0.125561	0.228181	0.228181	0.420693
1766	PM20D1	0.0677001	0.203357	0.203357	0.391122
1767	SLC26A9	0.0187526	5.89459e-25	5.89459e-25	2.41378e-23
1768	RAB7B	0.136055	2.01033e-05	2.01033e-05	0.000120656
1769	CTSE	-0.00027977	0.0105035	0.0105035	0.0395622
1770	RHEX	-0.00947142	0.459186	0.459186	0.649117
1771	FAM72A	-0.0558978	0.254972	0.254972	0.452366
1772	SRGAP2	-0.113809	0.271494	0.271494	0.469926
1773	IKBKE	-0.173488	0.0899637	0.0899637	0.220667
1774	C1orf147	0.0122312	2.02009e-25	2.02009e-25	1.80876e-23
1775	AC244034.2	0.00817771	1.56469e-23	1.56469e-23	3.27363e-22
1776	RASSF5	-0.26502	0.00536231	0.00536231	0.0219805
1777	EIF2D	-0.220954	0.0736694	0.0736694	0.191386
1778	AL591846.2	0.0852651	0.0399288	0.0399288	0.119164
1779	DYRK3	0.0813447	0.100211	0.100211	0.238245
1780	MAPKAPK2	0.0542145	0.371502	0.371502	0.570227
1781	IL10	0.049292	0.213652	0.213652	0.404034
1782	IL19	-0.0067134	0.0331186	0.0331186	0.102903
1783	IL20	0.0210109	8.27875e-24	8.27875e-24	1.85153e-22
1784	IL24	0.00573626	5.26026e-12	5.26026e-12	4.69431e-11
1785	FCMR	-0.150307	0.378133	0.378133	0.576499
1786	PIGR	-0.0377795	2.37747e-10	2.37747e-10	1.96633e-09
1787	FCAMR	0.0350761	0.226802	0.226802	0.419241
1788	C1orf116	-0.00370149	0.00262692	0.00262692	0.0116568
1789	PFKFB2	0.00651923	0.834267	0.834267	0.911519
1790	YOD1	0.0665035	0.295372	0.295372	0.494731
1791	C4BPB	0.000277048	0.621285	0.621285	0.776018
1792	C4BPA	0.00322004	5.42363e-13	5.42363e-13	5.06491e-12
1793	CD55	0.0498482	0.467395	0.467395	0.655833
1794	CR2	0.0066363	2.84526e-19	2.84526e-19	3.55101e-18
1795	CR1	-0.0490769	0.167908	0.167908	0.343225
1796	AL137789.1	0.00508642	8.98725e-24	8.98725e-24	1.97484e-22
1797	CR1L	0.0107275	0.232017	0.232017	0.424857
1798	CD46	-0.094843	0.293856	0.293856	0.493177
1799	MIR29B2CHG	-0.00840515	0.847973	0.847973	0.918458
1800	PLXNA2	0.00506626	0.576515	0.576515	0.742421
1801	CAMK1G	0.0313757	0.0879067	0.0879067	0.217268
1802	LAMB3	-0.00469947	0.791738	0.791738	0.884634
1803	AL031316.1	-0.034159	0.250831	0.250831	0.447427
1804	G0S2	0.0345353	0.445018	0.445018	0.638198
1805	HSD11B1	0.0991399	0.00953674	0.00953674	0.0363224
1806	TRAF3IP3	-0.549847	0.000219337	0.000219337	0.00117946
1807	C1orf74	-0.0249754	0.522838	0.522838	0.70088
1808	IRF6	-0.00196781	4.13986e-25	4.13986e-25	2.04387e-23
1809	UTP25	-0.0653166	0.526329	0.526329	0.703221
1810	SERTAD4-AS1	-0.00283902	1.90205e-14	1.90205e-14	1.88387e-13
1811	SERTAD4	0.00288988	4.41281e-13	4.41281e-13	4.14018e-12
1812	HHAT	-0.0231331	0.451504	0.451504	0.64305
1813	RCOR3	-0.133108	0.253074	0.253074	0.450253
1814	TRAF5	0.157881	0.339225	0.339225	0.540148
1815	LINC00467	0.0151879	0.772199	0.772199	0.872629
1816	SLC30A1	-0.045372	0.0993868	0.0993868	0.236818
1817	NEK2	-0.160429	0.000394627	0.000394627	0.00205076
1818	AC096637.2	0.00535126	6.67052e-15	6.67052e-15	6.73958e-14
1819	LPGAT1	-0.0468489	0.455061	0.455061	0.645835
1820	INTS7	-0.0576486	0.577036	0.577036	0.742615
1821	DTL	0.0427598	0.705453	0.705453	0.832874
1822	AL451060.1	0.0568794	0.0507336	0.0507336	0.143831
1823	PPP2R5A	-0.188321	0.0393979	0.0393979	0.117872
1824	AL360091.3	0.0265175	0.359622	0.359622	0.559517
1825	TMEM206	-0.0264349	0.721963	0.721963	0.842935
1826	NENF	0.106024	0.183694	0.183694	0.364959
1827	LINC01740	0.0109265	9.60131e-21	9.60131e-21	1.33671e-19
1828	AC092803.2	0.0279803	0.257813	0.257813	0.455299
1829	ATF3	-0.0216966	0.694513	0.694513	0.826615
1830	FAM71A	0.0126844	0.333351	0.333351	0.534388
1831	AL590648.3	0.00558916	6.50663e-20	6.50663e-20	8.53932e-19
1832	BATF3	-0.0230236	0.590799	0.590799	0.753766
1833	NSL1	-0.132707	0.243385	0.243385	0.438878
1834	TATDN3	-0.103257	0.276162	0.276162	0.47498
1835	FLVCR1-DT	-0.0790897	0.255781	0.255781	0.453344
1836	FLVCR1	-0.074202	0.117908	0.117908	0.267781
1837	VASH2	-0.0135635	0.288868	0.288868	0.487777
1838	ANGEL2	0.0101596	0.933237	0.933237	0.966352
1839	RPS6KC1	0.163518	0.101594	0.101594	0.240736
1840	PROX1	0.00627892	0.627068	0.627068	0.779754
1841	SMYD2	0.0861722	0.490998	0.490998	0.674594
1842	PTPN14	0.00122104	0.0116096	0.0116096	0.0430588
1843	CENPF	-0.038581	0.830023	0.830023	0.908314
1844	KCTD3	0.0264346	0.486823	0.486823	0.671423
1845	ESRRG	0.000963178	2.37853e-11	2.37853e-11	2.05512e-10
1846	GPATCH2	-0.0997529	0.291124	0.291124	0.490229
1847	SPATA17	-0.010004	2.96875e-20	2.96875e-20	3.98462e-19
1848	RRP15	-0.0100927	0.925848	0.925848	0.962887
1849	TGFB2-AS1	0.00738553	1.59487e-24	1.59487e-24	4.71565e-23
1850	TGFB2	0.00425223	9.45982e-23	9.45982e-23	1.67724e-21
1851	C1orf143	-0.00229353	3.31297e-09	3.31297e-09	2.57482e-08
1852	LYPLAL1	-0.0421993	0.640902	0.640902	0.790018
1853	AC096642.1	-0.0189207	0.139256	0.139256	0.301613
1854	ZC3H11B	0.0320433	0.620594	0.620594	0.775781
1855	EPRS	0.358336	0.00413681	0.00413681	0.0175215
1856	BPNT1	-0.0165723	0.868228	0.868228	0.929658
1857	IARS2	0.00358193	0.970355	0.970355	0.985053
1858	RAB3GAP2	0.0350688	0.745536	0.745536	0.857272
1859	MARK1	-0.0075363	1.86579e-05	1.86579e-05	0.000112182
1860	C1orf115	0.00701823	0.404187	0.404187	0.601262
1861	2021-03-02	-0.0100315	0.433332	0.433332	0.628523
1862	2021-03-01	-0.00768919	3.35411e-10	3.35411e-10	2.75369e-09
1863	HLX-AS1	0.0306298	1.51037e-20	1.51037e-20	2.07428e-19
1864	HLX	0.1099	0.00408823	0.00408823	0.0173413
1865	DUSP10	-0.257983	0.00162657	0.00162657	0.00753372
1866	LINC01655	0.000216452	0.986563	0.986563	0.992586
1867	LINC02257	0.0230178	5.84367e-24	5.84367e-24	1.37418e-22
1868	LINC01705	0.0657543	5.94069e-11	5.94069e-11	5.04833e-10
1869	AL513314.2	0.00681503	0.829883	0.829883	0.908209
1870	TAF1A	-0.0847911	0.266388	0.266388	0.464607
1871	TAF1A-AS1	-0.040321	0.0901732	0.0901732	0.220943
1872	MIA3	-0.156487	0.16704	0.16704	0.342006
1873	AL592148.3	-0.0348533	0.414561	0.414561	0.611486
1874	AIDA	0.0224997	0.822956	0.822956	0.90432
1875	BROX	0.121121	0.131347	0.131347	0.28922
1876	FAM177B	-0.013988	0.274417	0.274417	0.472836
1877	AL392172.1	-0.00601359	0.925453	0.925453	0.962887
1878	DISP1	-0.0230025	0.302663	0.302663	0.501938
1879	TLR5	0.0433848	0.3563	0.3563	0.556112
1880	SUSD4	-0.0202776	0.59968	0.59968	0.759797
1881	CAPN8	-0.00190837	4.86029e-05	4.86029e-05	0.000282512
1882	CAPN2	0.0847986	0.315986	0.315986	0.51672
1883	TP53BP2	0.0770622	0.36029	0.36029	0.560007
1884	FBXO28	-0.124627	0.172319	0.172319	0.350105
1885	DEGS1	-0.167313	0.118796	0.118796	0.269037
1886	NVL	-0.0635861	0.540307	0.540307	0.714558
1887	CNIH4	0.133913	0.0678479	0.0678479	0.179738
1888	WDR26	-0.0561497	0.451927	0.451927	0.643379
1889	CNIH3	-0.0334821	0.149817	0.149817	0.317645
1890	DNAH14	0.0241153	0.578046	0.578046	0.743386
1891	LBR	0.107237	0.398048	0.398048	0.595694
1892	ENAH	-0.0315211	0.0479753	0.0479753	0.137484
1893	SRP9	-0.048968	0.61811	0.61811	0.774164
1894	EPHX1	0.0709752	0.000816685	0.000816685	0.0040226
1895	AL591895.1	0.05326	0.21957	0.21957	0.411279
1896	TMEM63A	0.0628621	0.537803	0.537803	0.712714
1897	PYCR2	0.37278	0.00599666	0.00599666	0.0242106
1898	SDE2	-0.100134	0.215745	0.215745	0.406652
1899	AL512343.2	0.00465787	3.38078e-25	3.38078e-25	1.89837e-23
1900	H3F3A	-0.0776192	0.346567	0.346567	0.546563
1901	LINC01703	0.00860184	0.72959	0.72959	0.84767
1902	ACBD3	0.0963182	0.139821	0.139821	0.302543
1903	ACBD3-AS1	-0.0392985	0.102275	0.102275	0.241913
1904	LIN9	-0.150322	0.0750317	0.0750317	0.193931
1905	PARP1	0.00515114	0.973747	0.973747	0.986431
1906	STUM	-0.000973759	0.0417378	0.0417378	0.123518
1907	ITPKB	-0.143703	0.248321	0.248321	0.444629
1908	PSEN2	-0.0328139	0.619063	0.619063	0.77459
1909	COQ8A	-0.0302497	0.803417	0.803417	0.892022
1910	CDC42BPA	0.0169465	2.37822e-05	2.37822e-05	0.0001421
1911	ZNF678	-0.149281	0.0407249	0.0407249	0.121073
1912	SNAP47	-0.365054	0.0242074	0.0242074	0.0797409
1913	JMJD4	-0.0933674	0.410077	0.410077	0.607235
1914	WNT9A	-0.00161091	3.55802e-08	3.55802e-08	2.6233e-07
1915	ARF1	-0.00908096	0.911166	0.911166	0.955165
1916	C1orf35	-0.0665057	0.577868	0.577868	0.743211
1917	MRPL55	-0.0111158	0.912292	0.912292	0.955639
1918	GUK1	-0.112415	0.183153	0.183153	0.364386
1919	GJC2	-0.0115742	0.365881	0.365881	0.56553
1920	IBA57-DT	0.00621227	3.662e-24	3.662e-24	9.20352e-23
1921	IBA57	-0.111252	0.0937333	0.0937333	0.227033
1922	OBSCN-AS1	-0.0443656	0.082765	0.082765	0.208246
1923	OBSCN	-0.163653	0.014007	0.014007	0.0505067
1924	AL353593.1	-0.0225331	0.310012	0.310012	0.509824
1925	AL353593.2	0.0177285	2.50212e-25	2.50212e-25	1.80876e-23
1926	TRIM11	-0.212983	0.0124803	0.0124803	0.0457233
1927	AL670729.1	0.0407891	0.198601	0.198601	0.385172
1928	TRIM17	-0.0135868	0.288767	0.288767	0.487777
1929	HIST3H2A	-0.027234	0.786984	0.786984	0.881242
1930	HIST3H2BB	-0.0258623	0.386976	0.386976	0.584476
1931	RNF187	-0.0313648	0.773329	0.773329	0.873383
1932	RHOU	0.0818216	0.00918276	0.00918276	0.0351741
1933	RAB4A	0.040939	0.664614	0.664614	0.807094
1934	AL117350.1	-0.00176099	0.891512	0.891512	0.943571
1935	CCSAP	0.102848	0.196703	0.196703	0.382745
1936	ACTA1	0.00925746	3.70298e-24	3.70298e-24	9.29489e-23
1937	NUP133	0.0316642	0.796675	0.796675	0.88747
1938	AL121990.1	-0.04589	0.0535685	0.0535685	0.150007
1939	ABCB10	0.0140326	0.858396	0.858396	0.924108
1940	TAF5L	-0.0231888	0.699808	0.699808	0.829365
1941	URB2	-0.140259	0.0435296	0.0435296	0.127525
1942	LINC01736	0.0127003	2.68335e-25	2.68335e-25	1.80876e-23
1943	GALNT2	-0.305491	0.0104951	0.0104951	0.0395456
1944	AL136988.1	0.0429542	0.176013	0.176013	0.355314
1945	PGBD5	0.0330282	0.255437	0.255437	0.453014
1946	COG2	-0.183931	0.0182266	0.0182266	0.0631289
1947	AGT	-0.00127636	4.95446e-25	4.95446e-25	2.19899e-23
1948	CAPN9	-0.000372756	9.77444e-05	9.77444e-05	0.000548492
1949	C1orf198	0.0597149	0.305062	0.305062	0.504466
1950	TTC13	-0.197708	0.0387288	0.0387288	0.116377
1951	ARV1	0.098703	0.345685	0.345685	0.545941
1952	FAM89A	0.0836247	0.210265	0.210265	0.399669
1953	C1orf131	-0.214631	0.0648619	0.0648619	0.173743
1954	GNPAT	-0.239167	0.0449725	0.0449725	0.130661
1955	EXOC8	-0.0470514	0.662833	0.662833	0.80569
1956	SPRTN	-0.268754	0.00637175	0.00637175	0.0254794
1957	EGLN1	0.0893591	0.347241	0.347241	0.547322
1958	AL445524.1	0.000298562	0.99451	0.99451	0.997288
1959	TSNAX	0.0277049	0.700073	0.700073	0.829396
1960	TSNAX-DISC1	0.0277897	0.338559	0.338559	0.539559
1961	DISC1	-0.00162399	0.965116	0.965116	0.982551
1962	SIPA1L2	-0.0150134	0.499205	0.499205	0.6814
1963	MAP10	-0.00913667	0.804372	0.804372	0.892632
1964	NTPCR	0.00383413	0.968993	0.968993	0.984443
1965	PCNX2	-0.489226	8.86827e-05	8.86827e-05	0.000499875
1966	MAP3K21	-0.0456731	0.0848723	0.0848723	0.211982
1967	KCNK1	-0.0253564	0.0210822	0.0210822	0.0711684
1968	SLC35F3	0.0700041	0.0878502	0.0878502	0.217206
1969	AL355472.4	0.00658731	6.42234e-05	6.42234e-05	0.00036841
1970	AL355472.1	-0.164295	0.0287874	0.0287874	0.0917273
1971	COA6	0.0173391	0.802204	0.802204	0.891256
1972	TARBP1	-0.163297	0.000527855	0.000527855	0.00269298
1973	LINC01354	-0.0062747	4.73649e-06	4.73649e-06	3.00986e-05
1974	IRF2BP2	-0.0101755	0.878416	0.878416	0.935854
1975	AL160408.2	-0.0303154	0.436475	0.436475	0.631033
1976	AL160408.4	0.0146406	3.38027e-24	3.38027e-24	8.586e-23
1977	LINC01132	0.0111194	0.74475	0.74475	0.85667
1978	AL391832.1	-0.00211672	1.22135e-15	1.22135e-15	1.26449e-14
1979	AL391832.2	-0.052304	0.0149512	0.0149512	0.0533942
1980	AL391832.3	0.0148337	0.548767	0.548767	0.720956
1981	LINC01348	-0.00609337	1.99476e-11	1.99476e-11	1.72874e-10
1982	TOMM20	-0.230729	0.0143755	0.0143755	0.0516133
1983	RBM34	0.163478	0.247307	0.247307	0.443327
1984	ARID4B	-0.380661	6.73461e-05	6.73461e-05	0.000385114
1985	GGPS1	0.0621512	0.350642	0.350642	0.55061
1986	TBCE	-0.0988058	0.0349729	0.0349729	0.107485
1987	AL357556.4	0.00775146	1.88956e-25	1.88956e-25	1.80876e-23
1988	TBCE-1	-0.0976488	0.100998	0.100998	0.239719
1989	B3GALNT2	-0.0779548	0.315877	0.315877	0.516637
1990	GNG4	0.0326461	0.628847	0.628847	0.781249
1991	LYST	-0.134146	0.176958	0.176958	0.356613
1992	AL139161.2	0.00858257	2.37108e-22	2.37108e-22	4.00277e-21
1993	NID1	0.0232461	0.000119348	0.000119348	0.000662875
1994	GPR137B	0.179288	0.00107777	0.00107777	0.00517548
1995	ERO1B	-0.160514	0.0425379	0.0425379	0.125369
1996	EDARADD	-0.225263	0.0342016	0.0342016	0.105615
1997	LGALS8	-0.0951353	0.35375	0.35375	0.553373
1998	LGALS8-AS1	0.0407225	0.357138	0.357138	0.556809
[truncated: 18,111 more rows]

## Sheet: MonoMacVAP_EarlyTime_vs_LateTim
	gene	log2FC	pval	Pval_clean	qval
2440	IL1RN	1.1211	2.93e-154	1e-30	5.14e-150
1480	PTGS2	1.10949	2.63e-141	1e-30	2.31e-137
4384	TNIP3	1.08282	1.05e-103	1e-30	1.54e-100
11649	ACOD1	1.03639	2.41e-82	1e-30	1.41e-79
17169	APOBEC3A	1.00377	3.31e-90	1e-30	2.77e-87
11352	OASL	0.995164	2.31e-108	1e-30	4.5e-105
10228	IFIT2	0.982663	5.43e-136	1e-30	3.18e-132
5576	TNF	0.982258	3.65e-90	1e-30	2.91e-87
16322	ZFP36	0.975839	5.15e-130	1e-30	2.26e-126
10229	IFIT3	0.938566	3.28e-119	1e-30	1.15e-115
5554	IER3	0.933851	1.97e-112	1e-30	4.93e-109
5318	SERPINB9	0.93303	8.05e-90	1e-30	6.14e-87
9371	NEAT1	0.929008	8.98e-109	1e-30	1.97e-105
12	ISG15	0.926709	4.77e-114	1e-30	1.4e-110
15045	PMAIP1	0.920298	1.11e-91	1e-30	9.7e-89
4226	CXCL10	0.908142	4.76e-62	1e-30	1.31e-59
14692	H3F3B	0.882388	2.51e-97	1e-30	2.76e-94
14235	CCL4	0.87089	2.32e-85	1e-30	1.7e-82
6353	IL6	0.868149	1.51e-60	1e-30	3.89e-58
16563	PPP1R15A	0.859802	6.19e-102	1e-30	7.76e-99
2319	DUSP2	0.8589	2.28e-80	1e-30	1.29e-77
11935	NFKBIA	0.857085	3.71e-94	1e-30	3.62e-91
2435	IL1B	0.8449	7.56e-83	1e-30	4.58e-80
14203	CCL8	0.844529	2.14e-51	1e-30	3.8e-49
14658	CD300E	0.844283	2.54e-55	1e-30	5.24e-53
15933	JUNB	0.844019	1.48e-101	1e-30	1.73e-98
8630	TRAF1	0.827741	1.45e-65	1e-30	4.64e-63
5709	CDKN1A	0.827523	1.85e-77	1e-30	9.29e-75
4539	MIR3945HG	0.826682	4.78e-72	1e-30	2.06e-69
3478	NFKBIZ	0.824135	8.59e-97	1e-30	8.87e-94
8799	FCN1	0.810234	3.53e-55	1e-30	7.22e-53
12872	ISG20	0.802986	2.68e-107	1e-30	4.71e-104
9345	EHD1	0.799016	7.44e-83	1e-30	4.58e-80
12011	GCH1	0.793761	2.42e-70	1e-30	9.06e-68
14237	CCL3L1	0.780145	1.81e-65	1e-30	5.69e-63
9880	PFKFB3	0.76551	8.84e-84	1e-30	6.21e-81
4327	NFKB1	0.76508	3.41e-60	1e-30	8.68e-58
9016	ADM	0.76238	5.7e-75	1e-30	2.57e-72
4227	CXCL11	0.760529	1.38e-40	1e-30	1.6e-38
12323	TNFAIP2	0.76042	5.38e-72	1e-30	2.25e-69
1846	RSAD2	0.756374	6.25e-80	1e-30	3.43e-77
5141	TNIP1	0.753485	2.04e-70	1e-30	7.77e-68
15661	GADD45B	0.744662	1.5e-76	1e-30	7.33e-74
8896	IRF7	0.743817	1.11e-79	1e-30	5.88e-77
7707	SLC25A37	0.734805	2.56e-71	1e-30	1.04e-68
6877	AC016831.1	0.730731	1.31e-54	1e-30	2.64e-52
15848	ICAM1	0.729974	4.59e-67	1e-30	1.52e-64
7169	SAT1	0.72883	2.71e-76	1e-30	1.25e-73
14742	SOCS3	0.723614	2.13e-56	1e-30	4.56e-54
14520	AC015912.3	0.719548	3.36e-64	1e-30	9.83e-62
4940	TNFAIP8	0.719297	1.2e-48	1e-30	1.87e-46
10889	NR4A1	0.70859	7.2e-46	1e-30	1.04e-43
13285	IL27	0.705769	7.49e-40	1e-30	8.37e-38
13714	DNAAF1	0.700544	2.34e-53	1e-30	4.62e-51
17460	MX1	0.698643	1.45e-64	1e-30	4.3e-62
6776	NAMPT	0.698231	5.7e-61	1e-30	1.49e-58
11144	ATP2B1-AS1	0.694794	7.35e-57	1e-30	1.63e-54
3803	TNFSF10	0.693686	3.77e-63	1e-30	1.07e-60
17362	MIR155HG	0.689773	7.43e-40	1e-30	8.36e-38
14560	VMP1	0.688307	7.63e-60	1e-30	1.89e-57
5922	PNRC1	0.68098	1.52e-58	1e-30	3.55e-56
10231	IFIT1	0.678621	3.8e-70	1e-30	1.39e-67
10939	GPR84	0.678492	1.53e-46	1e-30	2.25e-44
15231	RIN2	0.673396	1.18e-36	1e-30	1.11e-34
778	GBP1	0.672931	7.06e-58	1e-30	1.63e-55
9372	MALAT1	0.67273	3.66e-43	1e-30	4.73e-41
5790	VEGFA	0.672512	1.07e-55	1e-30	2.25e-53
1821	NLRP3	0.666025	2.62e-45	1e-30	3.74e-43
10593	SLC2A3	0.665411	1.54e-56	1e-30	3.33e-54
2160	PLEK	0.663646	3.95e-60	1e-30	9.92e-58
8296	DDX58	0.66048	9.52e-50	1e-30	1.58e-47
6910	ZC3HAV1	0.657284	1.29e-52	1e-30	2.43e-50
13968	KDM6B	0.656373	4.43e-65	1e-30	1.34e-62
17349	SAMSN1	0.655709	9.93e-59	1e-30	2.36e-56
1636	ATF3	0.65437	1.48e-46	1e-30	2.21e-44
2172	MXD1	0.653945	2.45e-66	1e-30	7.96e-64
7564	FLNA	0.653486	6.66e-50	1e-30	1.12e-47
14539	AC004687.1	0.652603	3.85e-51	1e-30	6.76e-49
14086	AC007952.4	0.647857	2.17e-35	1e-30	1.95e-33
15617	MIDN	0.645843	7.86e-51	1e-30	1.37e-48
4289	HERC5	0.645692	2.93e-62	1e-30	8.15e-60
164	TNFRSF1B	0.642679	9.4e-49	1e-30	1.47e-46
16733	LILRB2	0.640566	1.3e-37	1e-30	1.29e-35
14234	CCL3	0.639563	2.22e-52	1e-30	4.11e-50
6093	TNFAIP3	0.637717	3.32e-53	1e-30	6.47e-51
8671	ZBTB43	0.634272	3.13e-40	1e-30	3.55e-38
10941	ITGA5	0.633283	1.23e-39	1e-30	1.34e-37
13820	SLC43A2	0.631236	9.97e-44	1e-30	1.32e-41
12302	WARS	0.628381	6.23e-39	1e-30	6.55e-37
812	F3	0.628097	4.23e-42	1e-30	5.23e-40
1434	ABL2	0.62718	4.47e-34	1e-30	3.74e-32
13746	SLC7A5	0.620528	2.74e-43	1e-30	3.57e-41
10635	OLR1	0.620159	4.85e-34	1e-30	4.02e-32
15953	IER2	0.614987	8.56e-50	1e-30	1.43e-47
1071	MCL1	0.613508	7.28e-49	1e-30	1.17e-46
9297	NXF1	0.609325	1e-42	1e-30	1.27e-40
4497	DDX60L	0.609237	1.26e-56	1e-30	2.77e-54
7787	IDO1	0.608169	6.45e-31	1e-30	4.66e-29
11502	FLT1	0.607871	5.1e-30	5.1e-30	3.46e-28
1615	G0S2	0.597023	2.48e-52	1e-30	4.53e-50
4211	CXCL2	0.596295	2.53e-42	1e-30	3.17e-40
14768	RNF213	0.594153	2.12e-52	1e-30	3.96e-50
5204	LCP2	0.589391	1.21e-52	1e-30	2.32e-50
5537	HLA-E	0.589168	1.14e-46	1e-30	1.71e-44
17148	MAFF	0.588264	1.89e-49	1e-30	3.1e-47
1138	S100A12	0.584321	9.08e-48	1e-30	1.4e-45
4410	NOCT	0.580775	1.85e-28	1.85e-28	1.16e-26
3749	CCNL1	0.580668	5.55e-52	1e-30	9.94e-50
3036	IRAK2	0.578811	2.91e-45	1e-30	4.12e-43
14238	CCL4L2	0.574783	7.63e-36	1e-30	7.05e-34
14107	WSB1	0.574204	7.99e-49	1e-30	1.26e-46
12626	AQP9	0.573597	5.28e-46	1e-30	7.66e-44
463	ZC3H12A	0.567997	1.02e-37	1e-30	1.02e-35
1302	SLAMF7	0.564814	9.68e-38	1e-30	9.71e-36
8882	IFITM3	0.563709	1.46e-40	1e-30	1.69e-38
11755	PNP	0.56152	3.79e-30	3.79e-30	2.61e-28
14104	MAP2K3	0.559821	6.78e-42	1e-30	8.26e-40
1976	FOSL2	0.559694	3.84e-45	1e-30	5.39e-43
6766	KMT2E-AS1	0.550504	1.13e-36	1e-30	1.07e-34
2434	IL1A	0.550289	6.59e-30	6.59e-30	4.45e-28
4214	EREG	0.549144	1.17e-28	1.17e-28	7.42e-27
17459	MX2	0.547228	1.43e-47	1e-30	2.18e-45
1853	ID2	0.545357	1.73e-32	1e-30	1.36e-30
9301	WDR74	0.543576	1.33e-25	1.33e-25	5.06e-24
16344	SERTAD1	0.543523	9.09e-33	1e-30	7.22e-31
1137	S100A9	0.542876	9.1e-40	1e-30	1.01e-37
11147	BTG1	0.540211	1.24e-34	1e-30	1.07e-32
13402	FUS	0.539955	7.87e-35	1e-30	6.87e-33
7178	GK	0.539675	1.07e-39	1e-30	1.17e-37
6013	CALHM6	0.538901	5.83e-25	5.83e-25	2.05e-23
11420	UBC	0.534993	8.16e-36	1e-30	7.5e-34
16476	FOSB	0.533731	1.13e-35	1e-30	1.03e-33
5061	HBEGF	0.533241	1.24e-24	1.24e-24	4.14e-23
783	GBP5	0.532354	2.1e-40	1e-30	2.4e-38
8880	IFITM1	0.53184	2.57e-61	1e-30	6.83e-59
16734	LILRA5	0.531001	6.36e-32	1e-30	4.89e-30
10096	SRGN	0.52967	5e-35	1e-30	4.41e-33
6485	MYO1G	0.52761	7.44e-25	7.44e-25	2.55e-23
6455	INHBA	0.527103	1.92e-24	1.92e-24	6.24e-23
13224	DCUN1D3	0.525554	6.39e-28	6.39e-28	3.79e-26
17443	ETS2	0.524874	1.27e-34	1e-30	1.09e-32
1139	S100A8	0.52395	3.8e-33	1e-30	3.06e-31
566	PLK3	0.520529	7.32e-39	1e-30	7.65e-37
7208	MIR222HG	0.51826	1.38e-24	1.38e-24	4.57e-23
8490	NINJ1	0.516912	4.93e-34	1e-30	4.07e-32
4496	DDX60	0.515925	4.64e-32	1e-30	3.59e-30
2114	REL	0.514432	1.24e-29	1.24e-29	8.22e-28
7700	TNFRSF10D	0.513377	1.96e-23	1.96e-23	5.78e-22
5602	HSPA1A	0.511691	7.12e-29	7.12e-29	4.53e-27
11615	INTS6	0.511499	4.85e-33	1e-30	3.89e-31
17295	PIM3	0.509316	9.02e-33	1e-30	7.2e-31
2133	PELI1	0.509172	4.69e-31	1e-30	3.42e-29
16323	PLEKHG2	0.508955	9.68e-31	1e-30	6.91e-29
4061	CD38	0.508943	5.8e-26	5.8e-26	2.32e-24
7068	INSIG1	0.507835	6.12e-28	6.12e-28	3.64e-26
2135	LINC00309	0.507443	1.22e-23	1.22e-23	3.65e-22
2742	CFLAR	0.505294	1.68e-33	1e-30	1.37e-31
2583	IFIH1	0.504218	3.89e-32	1e-30	3.05e-30
297	RSRP1	0.503711	4.11e-31	1e-30	3.03e-29
14503	SPAG9	0.50357	7.06e-37	1e-30	6.77e-35
740	IFI44	0.502418	1.23e-29	1.23e-29	8.19e-28
700	PDE4B	0.502129	1.52e-34	1e-30	1.29e-32
6195	SOD2	0.501655	4.33e-38	1e-30	4.37e-36
2284	CYTOR	0.499927	1.22e-30	1.22e-30	8.63e-29
9967	YME1L1	0.497679	7.47e-30	7.47e-30	5.02e-28
974	NBPF26	0.496213	1.24e-31	1e-30	9.34e-30
1255	ETV3	0.495784	3.12e-23	3.12e-23	8.99e-22
5542	PPP1R10	0.495017	6.63e-35	1e-30	5.82e-33
8247	CD274	0.494755	2.7e-28	2.7e-28	1.66e-26
16213	FFAR2	0.492547	2.15e-41	1e-30	2.57e-39
10184	PPIF	0.492218	1.05e-39	1e-30	1.16e-37
14413	HEXIM1	0.490979	1.32e-25	1.32e-25	5.02e-24
12553	AC025580.2	0.490234	6.29e-22	6.29e-22	1.63e-20
6764	AC007384.1	0.487607	1.23e-29	1.23e-29	8.19e-28
9005	DENND5A	0.48232	4.04e-29	4.04e-29	2.63e-27
8113	NDRG1	0.481426	2.05e-28	2.05e-28	1.27e-26
13409	ITGAX	0.480697	2.18e-31	1e-30	1.62e-29
3157	CSRNP1	0.479462	1.33e-35	1e-30	1.21e-33
15375	TOP1	0.479311	1.06e-26	1.06e-26	5.11e-25
6197	WTAP	0.478741	8.61e-26	8.61e-26	3.35e-24
5394	JARID2	0.478473	4.5e-21	4.5e-21	1.09e-19
8301	DNAJA1	0.478327	2.51e-27	2.51e-27	1.43e-25
12059	HIF1A	0.475619	3.64e-28	3.64e-28	2.21e-26
404	MARCKSL1	0.474037	1.37e-21	1.37e-21	3.46e-20
14762	EIF4A3	0.471666	8.08e-28	8.08e-28	4.71e-26
16747	LILRB1	0.46991	1.23e-18	1.23e-18	2.53e-17
1552	BTG2	0.469683	1.42e-35	1e-30	1.29e-33
15988	ADGRE2	0.46869	4.95e-27	4.95e-27	2.78e-25
17422	RUNX1	0.467373	2.6e-20	2.6e-20	5.99e-19
9942	ARL5B	0.466469	1.77e-37	1e-30	1.75e-35
1595	IL10	0.465141	2.44e-19	2.44e-19	5.23e-18
15470	PTPN1	0.464339	4.85e-20	4.85e-20	1.1e-18
357	SESN2	0.463427	6.45e-25	6.45e-25	2.25e-23
9999	CREM	0.463263	8.18e-32	1e-30	6.24e-30
10343	NFKB2	0.462484	8.15e-32	1e-30	6.24e-30
3896	HES1	0.461754	2.18e-26	2.18e-26	9.65e-25
12757	PML	0.459314	1.05e-26	1.05e-26	5.06e-25
1972	RBKS	0.458198	1.52e-28	1.52e-28	9.58e-27
8540	NR4A3	0.457928	1.58e-22	1.58e-22	4.31e-21
415	RNF19B	0.457161	6.1e-24	6.1e-24	1.89e-22
2703	NABP1	0.457077	9.31e-32	1e-30	7.04e-30
14850	METRNL	0.456721	3.8e-24	3.8e-24	1.2e-22
5603	HSPA1B	0.456148	1.95e-23	1.95e-23	5.74e-22
3568	PARP14	0.45542	6.78e-25	6.78e-25	2.35e-23
739	IFI44L	0.455364	1.6e-26	1.6e-26	7.29e-25
4537	ACSL1	0.453163	1.8e-27	1.8e-27	1.03e-25
1176	IL6R	0.452321	2.41e-24	2.41e-24	7.77e-23
11293	OAS3	0.451426	3.11e-25	3.11e-25	1.14e-23
6496	UPP1	0.450939	1.28e-21	1.28e-21	3.23e-20
734	NEXN	0.449973	1.63e-16	1.63e-16	2.94e-15
4991	AFF4	0.449101	1.66e-27	1.66e-27	9.56e-26
10128	DDIT4	0.447825	4.92e-30	4.92e-30	3.34e-28
2620	MAP3K20	0.446636	1.74e-20	1.74e-20	4.06e-19
8791	SLC2A6	0.446208	3.96e-17	3.96e-17	7.4e-16
4847	VCAN	0.443837	3.27e-17	3.27e-17	6.13e-16
13655	ZFHX3	0.441479	2.68e-17	2.68e-17	5.07e-16
16194	GRAMD1A	0.44068	5.16e-25	5.16e-25	1.83e-23
13477	MT2A	0.44018	5.85e-23	5.85e-23	1.66e-21
3348	STAB1	0.43827	1.6e-15	1.6e-15	2.73e-14
15766	TNFSF9	0.437225	1.14e-17	1.14e-17	2.21e-16
5643	BRD2	0.437065	5.07e-28	5.07e-28	3.04e-26
4882	ELL2	0.436073	1.75e-20	1.75e-20	4.08e-19
16027	MYO9B	0.43585	4.07e-21	4.07e-21	9.94e-20
1605	CD55	0.43578	5.16e-29	5.16e-29	3.33e-27
11292	OAS1	0.435586	2.55e-20	2.55e-20	5.88e-19
6372	HNRNPA2B1	0.435092	3.83e-23	3.83e-23	1.1e-21
13915	XAF1	0.43505	6.81e-26	6.81e-26	2.69e-24
12886	ANPEP	0.434789	8.92e-18	8.92e-18	1.74e-16
9520	RELT	0.432841	2.09e-23	2.09e-23	6.13e-22
16422	PLAUR	0.432232	1.28e-27	1.28e-27	7.42e-26
3898	ATP13A3	0.431459	1.64e-18	1.64e-18	3.35e-17
8944	KCNQ1OT1	0.431385	3.26e-18	3.26e-18	6.55e-17
11558	EPSTI1	0.429872	1.97e-20	1.97e-20	4.59e-19
4982	IRF1	0.429029	8.39e-27	8.39e-27	4.27e-25
15557	HELZ2	0.427609	1.36e-27	1.36e-27	7.86e-26
12823	BCL2A1	0.427332	5.13e-25	5.13e-25	1.82e-23
6414	NT5C3A	0.426355	5.76e-26	5.76e-26	2.32e-24
14714	SPHK1	0.425417	3.1e-19	3.1e-19	6.63e-18
16781	UBE2S	0.424487	1.1e-23	1.1e-23	3.31e-22
1045	HIST2H2AA4	0.424484	1.25e-20	1.25e-20	2.95e-19
4215	AREG	0.424048	6.1e-18	6.1e-18	1.2e-16
6011	DSE	0.423469	1.19e-19	1.19e-19	2.63e-18
17184	ATF4	0.423209	2.99e-21	2.99e-21	7.38e-20
10714	AC087239.1	0.422943	2.53e-23	2.53e-23	7.37e-22
13262	RBBP6	0.422733	6.46e-22	6.46e-22	1.67e-20
3743	TIPARP	0.418717	2.24e-18	2.24e-18	4.54e-17
15459	SNAI1	0.418549	5.58e-15	5.58e-15	9.25e-14
2701	STAT4	0.418312	1.16e-19	1.16e-19	2.56e-18
11480	SPATA13	0.418198	1.57e-22	1.57e-22	4.27e-21
7229	CFP	0.417603	1.79e-16	1.79e-16	3.2e-15
9655	CARD16	0.41715	7.23e-28	7.23e-28	4.24e-26
2544	TNFAIP6	0.416557	1.12e-21	1.12e-21	2.85e-20
10389	DUSP5	0.416184	5.79e-23	5.79e-23	1.65e-21
1449	IER5	0.414758	7.37e-23	7.37e-23	2.06e-21
9980	MAP3K8	0.414347	2.71e-17	2.71e-17	5.11e-16
8878	IFITM2	0.413978	1.92e-28	1.92e-28	1.19e-26
1845	CMPK2	0.413393	1.16e-23	1.16e-23	3.5e-22
16453	NECTIN2	0.412021	6.23e-16	6.23e-16	1.09e-14
16012	KLF2	0.411473	4.21e-27	4.21e-27	2.38e-25
496	MFSD2A	0.411028	2.42e-17	2.42e-17	4.59e-16
5284	SQSTM1	0.409839	4.05e-25	4.05e-25	1.46e-23
17237	Z93241.1	0.409268	3.54e-14	3.54e-14	5.57e-13
15678	GNA15	0.40809	7.34e-17	7.34e-17	1.34e-15
4324	SLC39A8	0.407705	7.03e-16	7.03e-16	1.23e-14
8856	TUBB4B	0.406643	1.54e-19	1.54e-19	3.36e-18
16913	USP18	0.406195	6.89e-25	6.89e-25	2.38e-23
16612	ATF5	0.405634	3.62e-15	3.62e-15	6.08e-14
779	GBP2	0.405562	6.84e-22	6.84e-22	1.76e-20
16233	NFKBID	0.405531	1.47e-31	1e-30	1.1e-29
6801	IFRD1	0.405454	4.97e-28	4.97e-28	3e-26
15613	SBNO2	0.405292	3.2e-21	3.2e-21	7.87e-20
14813	MAFG	0.404645	2.4e-21	2.4e-21	5.95e-20
15279	HCK	0.40442	1.71e-20	1.71e-20	4.01e-19
17314	TYMP	0.403414	2.43e-18	2.43e-18	4.92e-17
15358	SRC	0.403265	3.68e-14	3.68e-14	5.79e-13
2414	MIR4435-2HG	0.402633	2.65e-26	2.65e-26	1.14e-24
8016	AP003354.2	0.402445	2.13e-21	2.13e-21	5.29e-20
9765	H2AFX	0.400247	5.38e-15	5.38e-15	8.95e-14
8555	ABCA1	0.398852	1.49e-18	1.49e-18	3.07e-17
15063	SERPINB2	0.398344	2.88e-14	2.88e-14	4.57e-13
9003	NRIP3	0.397857	3.04e-15	3.04e-15	5.13e-14
4326	AF213884.3	0.397772	7.89e-16	7.89e-16	1.37e-14
15961	AC020916.1	0.397159	4.27e-25	4.27e-25	1.52e-23
9366	CDC42EP2	0.396475	6.02e-19	6.02e-19	1.26e-17
5390	CD83	0.396066	2.15e-20	2.15e-20	4.98e-19
2329	ARID5A	0.395558	1.01e-20	1.01e-20	2.42e-19
11098	THAP2	0.393196	4.24e-15	4.24e-15	7.1e-14
16479	VASP	0.39193	2.1e-22	2.1e-22	5.65e-21
6767	KMT2E	0.390844	1.83e-20	1.83e-20	4.26e-19
11926	BAZ1A	0.390705	2.63e-20	2.63e-20	6.05e-19
14343	STAT3	0.390253	1.38e-23	1.38e-23	4.12e-22
15466	CEBPB	0.389487	2.3e-19	2.3e-19	4.95e-18
5412	RNF144B	0.389414	1.51e-17	1.51e-17	2.9e-16
2529	ZEB2	0.38937	4.48e-18	4.48e-18	8.88e-17
8012	KLF10	0.38772	1.63e-20	1.63e-20	3.84e-19
11392	VPS37B	0.386477	2.73e-28	2.73e-28	1.67e-26
8948	PHLDA2	0.386295	1.07e-16	1.07e-16	1.94e-15
11749	AL355075.4	0.386013	2.73e-13	2.73e-13	3.99e-12
12447	THBS1	0.384124	1.83e-14	1.83e-14	2.95e-13
3802	FNDC3B	0.383566	4.35e-19	4.35e-19	9.18e-18
13956	EIF4A1	0.382313	9.03e-17	9.03e-17	1.64e-15
6003	MARCKS	0.382095	1.47e-19	1.47e-19	3.21e-18
10888	GRASP	0.381894	2.23e-14	2.23e-14	3.57e-13
5035	EGR1	0.381735	3.83e-17	3.83e-17	7.17e-16
15771	TRIP10	0.380046	5.24e-16	5.24e-16	9.19e-15
4863	LUCAT1	0.379606	1.67e-22	1.67e-22	4.54e-21
14518	TRIM25	0.379573	1.94e-23	1.94e-23	5.71e-22
8464	CKS2	0.379404	3.45e-16	3.45e-16	6.1e-15
2373	RNF149	0.378927	3.17e-24	3.17e-24	1.01e-22
7177	CXorf21	0.377252	1.83e-14	1.83e-14	2.95e-13
10793	SLC38A2	0.377142	1.72e-17	1.72e-17	3.29e-16
97	KLHL21	0.376619	4.13e-25	4.13e-25	1.48e-23
9282	CSKMT	0.376601	1.24e-15	1.24e-15	2.13e-14
4484	RAPGEF2	0.376315	2.08e-13	2.08e-13	3.07e-12
6878	AC016831.5	0.376249	1.78e-17	1.78e-17	3.4e-16
4574	LPCAT1	0.374634	3.97e-22	3.97e-22	1.04e-20
8735	IER5L	0.374038	1.22e-13	1.22e-13	1.85e-12
14058	RASD1	0.373876	1.37e-14	1.37e-14	2.23e-13
9587	PCF11	0.373327	3.38e-18	3.38e-18	6.77e-17
5872	CGAS	0.373287	1.77e-15	1.77e-15	3.01e-14
11143	ATP2B1	0.373028	5.61e-17	5.61e-17	1.04e-15
2657	SESTD1	0.372436	1.91e-13	1.91e-13	2.82e-12
3221	CCRL2	0.371638	4.94e-19	4.94e-19	1.04e-17
15452	ZNFX1	0.371611	2.05e-17	2.05e-17	3.91e-16
8969	TRIM22	0.370844	2.35e-22	2.35e-22	6.29e-21
15978	ADGRE5	0.370776	1.31e-18	1.31e-18	2.71e-17
3148	OXSR1	0.370434	4.37e-20	4.37e-20	9.92e-19
7427	TSC22D3	0.367885	8.4e-19	8.4e-19	1.75e-17
17160	GTPBP1	0.367563	1.4e-23	1.4e-23	4.19e-22
11404	RILPL2	0.366555	7.57e-20	7.57e-20	1.68e-18
7565	EMD	0.366509	1.67e-16	1.67e-16	3e-15
15982	DNAJB1	0.366157	5.73e-17	5.73e-17	1.06e-15
4250	RASGEF1B	0.365632	1.11e-12	1.11e-12	1.55e-11
15768	TNFSF14	0.365364	2.24e-26	2.24e-26	9.89e-25
1301	CD48	0.364446	8.22e-18	8.22e-18	1.61e-16
15243	CD93	0.36434	5.35e-13	5.35e-13	7.67e-12
16004	TPM4	0.364295	2.74e-16	2.74e-16	4.86e-15
7614	DEFB1	0.363813	6.88e-12	6.88e-12	9.03e-11
14152	NUFIP2	0.361369	7.09e-15	7.09e-15	1.17e-13
1475	IVNS1ABP	0.360919	3.12e-25	3.12e-25	1.14e-23
9876	IL15RA	0.360091	4.35e-13	4.35e-13	6.26e-12
10276	PIK3AP1	0.359729	1.1e-17	1.1e-17	2.14e-16
14728	SRSF2	0.358873	2.75e-17	2.75e-17	5.18e-16
5212	STK10	0.358497	1.98e-18	1.98e-18	4.03e-17
1538	KDM5B	0.357852	2.46e-17	2.46e-17	4.66e-16
9511	ARAP1	0.357777	1.56e-17	1.56e-17	2.99e-16
15858	CDC37	0.357737	1.31e-13	1.31e-13	1.98e-12
13274	IL4R	0.357655	6.49e-19	6.49e-19	1.36e-17
4609	BASP1	0.357261	1.99e-19	1.99e-19	4.31e-18
2698	GLS	0.356631	1.37e-13	1.37e-13	2.06e-12
15373	MAFB	0.35603	1.38e-12	1.38e-12	1.9e-11
3191	ABHD5	0.355636	3.34e-18	3.34e-18	6.69e-17
16741	LENG9	0.355413	1.52e-13	1.52e-13	2.28e-12
6293	FSCN1	0.355195	7.28e-12	7.28e-12	9.52e-11
11294	OAS2	0.355088	1.1e-14	1.1e-14	1.8e-13
10990	IL23A	0.354942	1.1e-14	1.1e-14	1.8e-13
7077	DNAJB6	0.354921	1.84e-13	1.84e-13	2.72e-12
5397	MYLIP	0.35428	6.98e-19	6.98e-19	1.46e-17
15456	SLC9A8	0.352257	2.32e-18	2.32e-18	4.7e-17
12350	GPR132	0.351839	4.34e-13	4.34e-13	6.25e-12
8315	UBAP1	0.351679	1.93e-16	1.93e-16	3.45e-15
5115	ADRB2	0.350197	7.36e-13	7.36e-13	1.04e-11
9117	CD44	0.349174	6.55e-17	6.55e-17	1.2e-15
3011	THUMPD3-AS1	0.347902	4.04e-13	4.04e-13	5.83e-12
17051	OSM	0.347592	1.52e-31	1e-30	1.14e-29
804	CCDC18	0.346851	2.81e-12	2.81e-12	3.8e-11
3043	HRH1	0.34617	3.83e-11	3.83e-11	4.74e-10
16321	MED29	0.3456	3.82e-15	3.82e-15	6.41e-14
4668	ANXA2R	0.343847	1.48e-16	1.48e-16	2.68e-15
245	ECE1	0.343354	1.03e-22	1.03e-22	2.84e-21
15648	DOT1L	0.342341	5.25e-11	5.25e-11	6.43e-10
13390	STX4	0.34232	5.87e-13	5.87e-13	8.39e-12
5839	ELOVL5	0.342038	1.14e-15	1.14e-15	1.96e-14
5879	CD109	0.341508	3.2e-10	3.2e-10	3.68e-09
7912	AC083837.1	0.341434	2.09e-11	2.09e-11	2.64e-10
17032	XBP1	0.340919	2.61e-15	2.61e-15	4.42e-14
13406	PYCARD-AS1	0.340697	4.16e-11	4.16e-11	5.14e-10
461	CSF3R	0.340457	1.46e-25	1.46e-25	5.48e-24
15534	SLCO4A1	0.34032	2.84e-14	2.84e-14	4.5e-13
5427	C6orf62	0.339878	3.23e-14	3.23e-14	5.11e-13
9135	C11orf96	0.339693	3.92e-10	3.92e-10	4.45e-09
3431	RYBP	0.339567	9.27e-18	9.27e-18	1.81e-16
6038	NCOA7	0.339399	1.36e-18	1.36e-18	2.8e-17
11984	SAV1	0.339102	1.47e-11	1.47e-11	1.88e-10
13420	ZNF267	0.336858	5.72e-17	5.72e-17	1.06e-15
10788	ANO6	0.336117	2.05e-10	2.05e-10	2.39e-09
17071	LIMK2	0.335123	1.86e-23	1.86e-23	5.48e-22
12744	ARIH1	0.335089	2.18e-14	2.18e-14	3.5e-13
2023	CDC42EP3	0.334922	8.94e-17	8.94e-17	1.63e-15
7275	TSPYL2	0.334689	3.92e-13	3.92e-13	5.68e-12
17124	CYTH4	0.334415	2.31e-14	2.31e-14	3.69e-13
14717	RHBDF2	0.332332	8.13e-13	8.13e-13	1.15e-11
6793	PNPLA8	0.331785	2.58e-14	2.58e-14	4.1e-13
13926	ASGR2	0.331704	5.13e-10	5.13e-10	5.77e-09
12916	CHD2	0.331105	1.43e-17	1.43e-17	2.76e-16
13618	NFAT5	0.327689	4.61e-13	4.61e-13	6.62e-12
15721	SEMA6B	0.327239	5.42e-10	5.42e-10	6.08e-09
17378	BACH1	0.326492	5.92e-13	5.92e-13	8.45e-12
7692	EGR3	0.326279	1.74e-18	1.74e-18	3.55e-17
13752	CYBA	0.32562	3.13e-14	3.13e-14	4.96e-13
13373	FBRS	0.325449	4.57e-15	4.57e-15	7.63e-14
2317	ADRA2B	0.324474	2.91e-11	2.91e-11	3.63e-10
14758	CBX4	0.323097	3e-13	3e-13	4.36e-12
15405	SDC4	0.322292	1.38e-10	1.38e-10	1.62e-09
7228	TIMP1	0.322148	2.07e-13	2.07e-13	3.05e-12
6124	STX11	0.32173	9.33e-13	9.33e-13	1.31e-11
2526	KYNU	0.320751	7.33e-11	7.33e-11	8.87e-10
17241	ARFGAP3	0.320311	1.51e-10	1.51e-10	1.78e-09
15314	TP53INP2	0.318663	1.2e-15	1.2e-15	2.06e-14
14342	STAT5A	0.317859	1.17e-12	1.17e-12	1.63e-11
11671	DNAJC3-DT	0.317788	4.25e-11	4.25e-11	5.23e-10
7670	ATP6V1B2	0.316786	4.48e-14	4.48e-14	7.01e-13
14333	DHX58	0.316479	4.04e-13	4.04e-13	5.83e-12
6704	MEPCE	0.316069	2.33e-12	2.33e-12	3.17e-11
9446	CLCF1	0.315234	8.02e-10	8.02e-10	8.82e-09
11097	ZFC3H1	0.314881	1.72e-13	1.72e-13	2.56e-12
5435	TRIM38	0.314605	1.05e-12	1.05e-12	1.47e-11
10299	SLC25A28	0.314477	7.7e-10	7.7e-10	8.48e-09
4483	FNIP2	0.313243	8.06e-11	8.06e-11	9.71e-10
12182	BATF	0.313119	7.83e-19	7.83e-19	1.63e-17
13983	TMEM107	0.312914	1.73e-09	1.73e-09	1.84e-08
2887	CCL20	0.312502	1.84e-10	1.84e-10	2.16e-09
9639	BIRC3	0.312395	1.63e-12	1.63e-12	2.24e-11
11717	ING1	0.312024	3.96e-11	3.96e-11	4.88e-10
8751	FNBP1	0.312004	2.95e-12	2.95e-12	3.98e-11
879	AMPD2	0.311827	7.46e-13	7.46e-13	1.06e-11
16423	SMG9	0.311622	5.88e-10	5.88e-10	6.58e-09
15791	STXBP2	0.311272	2.81e-13	2.81e-13	4.11e-12
6531	RABGEF1	0.310931	2.54e-12	2.54e-12	3.45e-11
8303	B4GALT1	0.310254	8.93e-11	8.93e-11	1.07e-09
12138	NUMB	0.309974	8.41e-13	8.41e-13	1.19e-11
366	AL360012.1	0.308372	7.2e-10	7.2e-10	7.96e-09
3715	TSC22D2	0.307975	1.66e-10	1.66e-10	1.95e-09
5569	HLA-B	0.307566	5.43e-13	5.43e-13	7.79e-12
5801	NFKBIE	0.307113	5.41e-11	5.41e-11	6.62e-10
8945	CDKN1C	0.307084	2.55e-11	2.55e-11	3.21e-10
1778	ERO1B	0.307084	3.86e-11	3.86e-11	4.77e-10
8126	AGO2	0.307076	3.14e-12	3.14e-12	4.24e-11
473	MTF1	0.306668	9.22e-13	9.22e-13	1.29e-11
16319	SAMD4B	0.306438	7.17e-14	7.17e-14	1.1e-12
15453	ZFAS1	0.306221	1.05e-12	1.05e-12	1.46e-11
7085	PLCXD1	0.306059	1.11e-09	1.11e-09	1.2e-08
1489	RGS2	0.305382	6.77e-14	6.77e-14	1.04e-12
7696	TNFRSF10B	0.305186	7.09e-10	7.09e-10	7.86e-09
8679	FAM129B	0.304442	2.75e-10	2.75e-10	3.18e-09
16450	BCL3	0.303768	4.81e-15	4.81e-15	8.02e-14
9139	CD82	0.303213	2.45e-12	2.45e-12	3.32e-11
2895	SP110	0.302715	1.78e-16	1.78e-16	3.19e-15
12178	FOS	0.302634	1.94e-12	1.94e-12	2.65e-11
972	NOTCH2	0.301607	2.06e-11	2.06e-11	2.6e-10
14881	DLGAP1-AS2	0.301457	1.49e-11	1.49e-11	1.91e-10
1587	SRGAP2	0.301304	4.95e-10	4.95e-10	5.57e-09
4204	CXCL8	0.301296	6.5e-12	6.5e-12	8.56e-11
17285	AL118516.1	0.301144	1.52e-12	1.52e-12	2.09e-11
14597	ERN1	0.300251	1.63e-13	1.63e-13	2.43e-12
11442	ANKLE2	0.299941	1.38e-09	1.38e-09	1.49e-08
6919	KDM7A	0.29994	3.02e-10	3.02e-10	3.48e-09
12829	CEMIP	0.299739	5.2e-08	5.2e-08	4.78e-07
10221	ANKRD22	0.299343	1.01e-09	1.01e-09	1.11e-08
1333	FCGR2A	0.298124	7.65e-12	7.65e-12	9.99e-11
6640	SAMD9	0.297852	3.39e-16	3.39e-16	6.01e-15
15027	TCF4	0.297845	6.95e-09	6.95e-09	7.01e-08
13722	CRISPLD2	0.297769	3.07e-10	3.07e-10	3.53e-09
6177	SNX9	0.297103	4.07e-09	4.07e-09	4.2e-08
7378	DIAPH2	0.296932	1.52e-09	1.52e-09	1.63e-08
11418	NCOR2	0.296026	3.55e-09	3.55e-09	3.67e-08
12060	HIF1A-AS2	0.295962	3.29e-13	3.29e-13	4.77e-12
4673	HMGCS1	0.294462	8.44e-12	8.44e-12	1.1e-10
12541	TRIM69	0.293466	2.69e-11	2.69e-11	3.37e-10
12551	C15orf48	0.293423	1.39e-13	1.39e-13	2.09e-12
2016	EIF2AK2	0.293035	1.83e-14	1.83e-14	2.95e-13
10554	CHD4	0.292961	2.75e-11	2.75e-11	3.44e-10
568	BTBD19	0.292957	2.98e-11	2.98e-11	3.72e-10
14745	DNAH17	0.292837	3.11e-11	3.11e-11	3.87e-10
6712	LRCH4	0.292562	1.02e-10	1.02e-10	1.22e-09
1666	HLX	0.292375	3.73e-08	3.73e-08	3.48e-07
15542	OGFR	0.292048	3.58e-12	3.58e-12	4.81e-11
1769	ARID4B	0.291736	4.1e-14	4.1e-14	6.45e-13
14747	CYTH1	0.291466	2.36e-11	2.36e-11	2.98e-10
5997	TRAF3IP2	0.291277	1.54e-08	1.54e-08	1.5e-07
14711	UBALD2	0.290706	5.93e-12	5.93e-12	7.81e-11
9730	IL10RA	0.290642	1.98e-10	1.98e-10	2.31e-09
8616	TNFSF8	0.289687	3.03e-09	3.03e-09	3.15e-08
12539	PATL2	0.289355	2.34e-12	2.34e-12	3.17e-11
5316	SERPINB1	0.288769	2.29e-11	2.29e-11	2.89e-10
13540	RRAD	0.288586	5.61e-10	5.61e-10	6.28e-09
3699	PLSCR1	0.288559	8.11e-12	8.11e-12	1.06e-10
994	AC245014.3	0.288055	5.37e-08	5.37e-08	4.93e-07
14537	TSPOAP1	0.287586	3.26e-11	3.26e-11	4.05e-10
774	GTF2B	0.287583	2.53e-11	2.53e-11	3.19e-10
8747	TOR1B	0.287211	1.66e-11	1.66e-11	2.11e-10
4871	MCTP1	0.287186	4.61e-12	4.61e-12	6.14e-11
11963	RPS29	0.287107	3.45e-11	3.45e-11	4.28e-10
16740	LENG8	0.286685	2.26e-10	2.26e-10	2.63e-09
435	SFPQ	0.286493	1.73e-09	1.73e-09	1.84e-08
14830	CSNK1D	0.286281	1.28e-12	1.28e-12	1.77e-11
6740	CUX1	0.286144	2.46e-09	2.46e-09	2.58e-08
11991	GNG2	0.285677	1.88e-19	1.88e-19	4.08e-18
6782	HBP1	0.28495	3.39e-11	3.39e-11	4.21e-10
15774	VAV1	0.284556	1.13e-11	1.13e-11	1.45e-10
17095	Z82244.2	0.284419	8.42e-10	8.42e-10	9.24e-09
4264	HPSE	0.284064	3.1e-10	3.1e-10	3.57e-09
8129	DENND3	0.283256	8.36e-14	8.36e-14	1.28e-12
6875	AC016831.7	0.28282	8.8e-13	8.8e-13	1.24e-11
3899	LINC00884	0.282785	6.42e-08	6.42e-08	5.85e-07
5278	HNRNPH1	0.282377	1.21e-09	1.21e-09	1.31e-08
15394	ADA	0.282103	7e-08	7e-08	6.35e-07
8467	GADD45G	0.281705	1.68e-08	1.68e-08	1.63e-07
13647	ZNF821	0.281547	1.04e-08	1.04e-08	1.03e-07
781	GBP4	0.281376	9.47e-12	9.47e-12	1.23e-10
777	GBP3	0.281225	6.97e-12	6.97e-12	9.14e-11
10546	VAMP1	0.280795	1.26e-09	1.26e-09	1.35e-08
6113	HIVEP2	0.280551	2.96e-11	2.96e-11	3.69e-10
5217	DUSP1	0.280068	6.68e-12	6.68e-12	8.78e-11
13149	SOCS1	0.280051	1.67e-10	1.67e-10	1.96e-09
9397	FOSL1	0.279598	1.32e-10	1.32e-10	1.57e-09
10078	JMJD1C	0.279381	3.5e-12	3.5e-12	4.71e-11
14602	POLG2	0.278568	2.08e-08	2.08e-08	2e-07
2168	AAK1	0.277137	5.11e-09	5.11e-09	5.21e-08
16353	ITPKC	0.277037	1.64e-09	1.64e-09	1.74e-08
4608	MYO10	0.276822	1.16e-08	1.16e-08	1.14e-07
14744	PGS1	0.276819	2.49e-13	2.49e-13	3.64e-12
2639	NFE2L2	0.276494	4.21e-11	4.21e-11	5.18e-10
7555	ARHGAP4	0.27593	2.02e-10	2.02e-10	2.35e-09
1269	MNDA	0.275252	1.6e-11	1.6e-11	2.04e-10
5002	UBE2B	0.275249	2.46e-14	2.46e-14	3.93e-13
1043	HIST2H2AA3	0.274804	1.75e-09	1.75e-09	1.86e-08
3966	GAK	0.274228	1.9e-10	1.9e-10	2.22e-09
736	DNAJB4	0.274056	4.61e-09	4.61e-09	4.72e-08
14988	PSTPIP2	0.273935	8.45e-10	8.45e-10	9.27e-09
16368	TGFB1	0.272534	1.64e-10	1.64e-10	1.93e-09
5855	PTP4A1	0.272211	9.69e-10	9.69e-10	1.06e-08
8051	ENPP2	0.271841	1.64e-07	1.64e-07	1.42e-06
15607	TMEM259	0.271574	8.97e-09	8.97e-09	8.97e-08
7355	RLIM	0.270242	7.03e-10	7.03e-10	7.8e-09
15859	PDE4A	0.270239	2.49e-07	2.49e-07	2.12e-06
7941	AF117829.1	0.269822	6.45e-08	6.45e-08	5.87e-07
14260	AC006449.6	0.269483	3.19e-09	3.19e-09	3.32e-08
14893	ANKRD12	0.268957	4.35e-12	4.35e-12	5.79e-11
17094	TOM1	0.26876	6.76e-13	6.76e-13	9.6e-12
7561	MECP2	0.268326	1.12e-10	1.12e-10	1.33e-09
4183	YTHDC1	0.267859	7.58e-11	7.58e-11	9.16e-10
17128	GGA1	0.267722	3.25e-09	3.25e-09	3.37e-08
14375	TMEM106A	0.267217	5.5e-07	5.5e-07	4.47e-06
12586	DMXL2	0.267135	1.6e-08	1.6e-08	1.55e-07
1454	RGS16	0.267048	4.24e-09	4.24e-09	4.35e-08
15242	THBD	0.266911	8.75e-07	8.75e-07	6.96e-06
282	PNRC2	0.266709	7.91e-09	7.91e-09	7.95e-08
9957	OTUD1	0.266429	6.13e-07	6.13e-07	4.95e-06
15840	C19orf66	0.266176	6.09e-10	6.09e-10	6.79e-09
4288	HERC6	0.265905	5.23e-11	5.23e-11	6.41e-10
13883	C17orf107	0.265865	8.18e-12	8.18e-12	1.07e-10
7549	SLC6A8	0.265733	4.15e-09	4.15e-09	4.27e-08
14132	SUPT6H	0.265194	2.94e-09	2.94e-09	3.06e-08
1334	HSPA6	0.265023	3.28e-08	3.28e-08	3.08e-07
8412	CEMIP2	0.264543	2.4e-09	2.4e-09	2.52e-08
9652	CASP4	0.26419	7.56e-11	7.56e-11	9.13e-10
16888	DDX3Y	0.26413	3.06e-11	3.06e-11	3.81e-10
9853	IDI1	0.26317	9.1e-11	9.1e-11	1.09e-09
15303	CHMP4B	0.263122	6.56e-09	6.56e-09	6.63e-08
12104	ACTN1	0.262801	2.13e-08	2.13e-08	2.04e-07
15850	ICAM4	0.26275	1.71e-09	1.71e-09	1.82e-08
4115	RHOH	0.262432	1.98e-14	1.98e-14	3.18e-13
5033	FAM53C	0.2619	3.51e-14	3.51e-14	5.54e-13
4435	SMARCA5	0.26148	1.17e-08	1.17e-08	1.15e-07
7147	SYAP1	0.261262	1.23e-11	1.23e-11	1.58e-10
16709	ZNF331	0.261153	1.03e-07	1.03e-07	9.15e-07
9172	SPI1	0.261009	1.02e-09	1.02e-09	1.12e-08
13084	MEFV	0.260389	2.94e-12	2.94e-12	3.98e-11
7780	TACC1	0.260134	2.14e-08	2.14e-08	2.05e-07
6802	LSMEM1	0.260024	2.67e-10	2.67e-10	3.09e-09
9275	EML3	0.259878	1.53e-07	1.53e-07	1.33e-06
11487	NUP58	0.259536	3.68e-09	3.68e-09	3.81e-08
1452	GLUL	0.259421	1.13e-09	1.13e-09	1.22e-08
4247	PRDM8	0.259071	4.86e-10	4.86e-10	5.47e-09
14021	HS3ST3B1	0.258602	1.54e-07	1.54e-07	1.35e-06
5247	RAB24	0.258236	1.06e-10	1.06e-10	1.27e-09
10854	NCKAP5L	0.257895	5.61e-07	5.61e-07	4.55e-06
12075	HSPA2	0.25775	1.04e-08	1.04e-08	1.03e-07
11045	USP15	0.257461	4.4e-10	4.4e-10	4.97e-09
6282	AP5Z1	0.256734	8.62e-11	8.62e-11	1.04e-09
14557	AC091271.1	0.256726	2.12e-14	2.12e-14	3.4e-13
5501	HIST1H2AM	0.256647	3.11e-09	3.11e-09	3.23e-08
11019	DDIT3	0.256485	2.59e-13	2.59e-13	3.8e-12
16730	LILRB3	0.256361	3.41e-10	3.41e-10	3.9e-09
15877	LDLR	0.255992	1.32e-09	1.32e-09	1.42e-08
13783	VPS9D1	0.255937	1.8e-12	1.8e-12	2.47e-11
1036	NBPF19	0.255734	1.36e-10	1.36e-10	1.61e-09
4155	TMEM165	0.255209	9.57e-09	9.57e-09	9.53e-08
11706	TNFSF13B	0.255096	5.33e-09	5.33e-09	5.43e-08
7942	RIPK2	0.254698	1.69e-07	1.69e-07	1.47e-06
13509	KIFC3	0.254618	1.05e-07	1.05e-07	9.32e-07
5703	ETV7	0.254575	2.19e-11	2.19e-11	2.77e-10
14642	SSTR2	0.2543	5.14e-07	5.14e-07	4.19e-06
9380	MAP3K11	0.253386	1.57e-09	1.57e-09	1.68e-08
3865	TRA2B	0.253162	5.61e-08	5.61e-08	5.13e-07
2032	SRSF7	0.25305	7.77e-09	7.77e-09	7.81e-08
4467	TLR2	0.253021	6.59e-10	6.59e-10	7.34e-09
16763	PPP1R12C	0.252995	1.4e-07	1.4e-07	1.23e-06
12128	SIPA1L1	0.252895	4.68e-09	4.68e-09	4.79e-08
13664	MLKL	0.252755	7.26e-09	7.26e-09	7.31e-08
16011	AC020911.2	0.252561	1.58e-10	1.58e-10	1.87e-09
6432	TRGC1	0.251637	2.7e-06	2.7e-06	2e-05
12920	MCTP2	0.251414	7.59e-14	7.59e-14	1.16e-12
9212	MPEG1	0.251211	4.29e-06	4.29e-06	3.08e-05
1683	TP53BP2	0.250619	3.21e-07	3.21e-07	2.7e-06
2106	PNPT1	0.250271	4.65e-10	4.65e-10	5.25e-09
1325	TOMM40L	0.249545	1.56e-08	1.56e-08	1.52e-07
1890	FAM49A	0.249236	1.94e-06	1.94e-06	1.47e-05
14546	TEX14	0.249206	8.93e-07	8.93e-07	7.1e-06
13630	ST3GAL2	0.24891	3.61e-07	3.61e-07	3.02e-06
16908	LINC00528	0.248889	7.19e-14	7.19e-14	1.1e-12
9017	AMPD3	0.248775	1.18e-07	1.18e-07	1.05e-06
2139	SERTAD2	0.24866	7.14e-08	7.14e-08	6.47e-07
10650	YBX3	0.248617	3.58e-07	3.58e-07	2.99e-06
6191	TAGAP	0.24859	6.4e-13	6.4e-13	9.11e-12
4246	ANTXR2	0.24843	8.33e-08	8.33e-08	7.49e-07
16071	JUND	0.248258	3.58e-08	3.58e-08	3.35e-07
12309	DYNC1H1	0.248219	2.16e-07	2.16e-07	1.85e-06
65	AL139246.5	0.247775	2.13e-14	2.13e-14	3.42e-13
7199	DDX3X	0.247518	5.73e-09	5.73e-09	5.82e-08
8564	KLF4	0.247439	3.49e-07	3.49e-07	2.92e-06
10021	RASSF4	0.246831	6.73e-06	6.73e-06	4.69e-05
10826	RND1	0.246618	6.89e-10	6.89e-10	7.65e-09
4717	PLK2	0.246593	1.49e-09	1.49e-09	1.59e-08
10189	AL135925.1	0.246339	9.89e-07	9.89e-07	7.79e-06
8615	TNFSF15	0.245199	9.08e-07	9.08e-07	7.21e-06
14743	AC061992.1	0.244794	9.01e-07	9.01e-07	7.16e-06
14726	JMJD6	0.244785	2.24e-10	2.24e-10	2.6e-09
9654	CASP1	0.244312	1.8e-08	1.8e-08	1.74e-07
3377	HESX1	0.244303	2.28e-09	2.28e-09	2.4e-08
17106	MYH9	0.24421	1.83e-09	1.83e-09	1.94e-08
15644	MKNK2	0.24402	7.64e-12	7.64e-12	9.98e-11
5097	NR3C1	0.243058	2.91e-07	2.91e-07	2.46e-06
4225	CXCL9	0.243051	1.45e-05	1.45e-05	9.64e-05
17100	APOL6	0.242701	6.46e-09	6.46e-09	6.53e-08
970	ZNF697	0.242137	4.55e-06	4.55e-06	3.25e-05
12326	MARK3	0.241998	8.24e-08	8.24e-08	7.41e-07
924	MOV10	0.241582	1.72e-08	1.72e-08	1.67e-07
738	AC103591.3	0.241119	1.27e-05	1.27e-05	8.52e-05
10	AL645608.8	0.241031	2.82e-13	2.82e-13	4.12e-12
16610	IL4I1	0.240882	8.82e-06	8.82e-06	6.05e-05
6741	SH2B2	0.240384	2.11e-09	2.11e-09	2.22e-08
11148	AC025164.1	0.240367	1.08e-06	1.08e-06	8.5e-06
15455	B4GALT5	0.239994	1.53e-07	1.53e-07	1.33e-06
11849	PPP1R3E	0.23961	3.33e-10	3.33e-10	3.81e-09
1594	MAPKAPK2	0.239105	2.74e-07	2.74e-07	2.32e-06
15425	ZNF335	0.239087	1.49e-07	1.49e-07	1.3e-06
6484	AC004854.2	0.238969	2.76e-09	2.76e-09	2.88e-08
1218	ARHGEF2	0.238487	3.91e-07	3.91e-07	3.26e-06
3159	AC092053.2	0.238198	1.83e-08	1.83e-08	1.77e-07
16947	MED15	0.237668	2.56e-07	2.56e-07	2.18e-06
15696	DAPK3	0.237418	2.14e-08	2.14e-08	2.05e-07
16308	NFKBIB	0.236966	1.69e-07	1.69e-07	1.47e-06
6730	TRIM56	0.236949	9.36e-09	9.36e-09	9.34e-08
14647	RPL38	0.236632	2.48e-07	2.48e-07	2.11e-06
2290	EIF2AK3	0.236265	1.37e-07	1.37e-07	1.21e-06
14369	IFI35	0.236247	6.46e-08	6.46e-08	5.87e-07
15701	SIRT6	0.235714	4.36e-07	4.36e-07	3.6e-06
9749	PHLDB1	0.235698	2.13e-06	2.13e-06	1.6e-05
10431	BAG3	0.235433	7.93e-06	7.93e-06	5.47e-05
11200	DRAM1	0.235069	8.55e-07	8.55e-07	6.81e-06
13826	MIR22HG	0.234798	3.61e-08	3.61e-08	3.37e-07
362	SNHG12	0.234788	5.46e-07	5.46e-07	4.44e-06
1534	PTPN7	0.234712	1.07e-08	1.07e-08	1.06e-07
5954	PRDM1	0.234704	1.08e-08	1.08e-08	1.07e-07
5432	RIPOR2	0.234595	9.39e-12	9.39e-12	1.22e-10
12699	MAP2K1	0.234589	2.13e-06	2.13e-06	1.6e-05
13998	PIK3R5	0.234468	2.61e-07	2.61e-07	2.22e-06
9383	RELA	0.234129	1.07e-07	1.07e-07	9.48e-07
17195	MKL1	0.234108	7.88e-07	7.88e-07	6.29e-06
13058	SRRM2	0.233919	7.57e-08	7.57e-08	6.82e-07
10109	PPA1	0.233917	2.14e-06	2.14e-06	1.61e-05
1860	ADAM17	0.233518	3.34e-07	3.34e-07	2.8e-06
9378	EHBP1L1	0.233517	4.43e-07	4.43e-07	3.65e-06
3751	PTX3	0.233316	1.26e-05	1.26e-05	8.44e-05
16746	LILRA1	0.233227	7.82e-06	7.82e-06	5.4e-05
3904	FAM43A	0.232719	2.91e-07	2.91e-07	2.46e-06
709	GADD45A	0.232265	1.34e-06	1.34e-06	1.03e-05
17115	CSF2RB	0.232242	5.72e-10	5.72e-10	6.4e-09
5987	AMD1	0.232198	6.97e-07	6.97e-07	5.6e-06
12325	EIF5	0.231978	2.12e-07	2.12e-07	1.82e-06
9053	NCR3LG1	0.231949	4.59e-08	4.59e-08	4.24e-07
3363	DCP1A	0.231843	4.6e-07	4.6e-07	3.78e-06
12807	DNAJA4	0.231535	5.14e-06	5.14e-06	3.65e-05
11100	RAB21	0.231443	9.12e-09	9.12e-09	9.11e-08
7222	CDK16	0.230882	2.22e-06	2.22e-06	1.66e-05
10872	SLC11A2	0.230561	1.3e-06	1.3e-06	1.01e-05
2735	CLK1	0.230474	2.48e-08	2.48e-08	2.37e-07
10167	SAMD8	0.230396	2.2e-07	2.2e-07	1.88e-06
5689	PPARD	0.229874	1.67e-06	1.67e-06	1.28e-05
13138	ATF7IP2	0.229868	4.42e-06	4.42e-06	3.17e-05
2255	MAT2A	0.229642	2.73e-06	2.73e-06	2.02e-05
6258	ZFAND2A	0.229386	2.33e-06	2.33e-06	1.75e-05
7087	LINC00685	0.228941	2.26e-07	2.26e-07	1.93e-06
4958	LMNB1	0.228853	4.9e-14	4.9e-14	7.62e-13
14637	KCNJ2	0.228667	1.12e-10	1.12e-10	1.33e-09
17207	TOB2	0.22789	2.84e-06	2.84e-06	2.1e-05
6918	PARP12	0.227714	6.52e-07	6.52e-07	5.25e-06
7944	NBN	0.227616	4.19e-08	4.19e-08	3.88e-07
5639	TAP1	0.227548	1.55e-08	1.55e-08	1.51e-07
10887	ACVR1B	0.227286	1.49e-06	1.49e-06	1.15e-05
1442	QSOX1	0.227271	2.01e-06	2.01e-06	1.51e-05
12112	SRSF5	0.226922	4.74e-07	4.74e-07	3.89e-06
1563	PPP1R15B	0.226811	2.42e-07	2.42e-07	2.06e-06
5036	ETF1	0.226793	2.12e-08	2.12e-08	2.04e-07
14290	CSF3	0.226495	5.55e-06	5.55e-06	3.92e-05
4928	FEM1C	0.226263	5.06e-07	5.06e-07	4.14e-06
12826	ARNT2	0.225446	1.93e-05	1.93e-05	0.000126186
1300	AL121985.1	0.225367	7.23e-08	7.23e-08	6.54e-07
2584	GCA	0.225325	1.07e-09	1.07e-09	1.17e-08
10402	TCF7L2	0.224956	9.82e-06	9.82e-06	6.7e-05
15770	GPR108	0.224623	1.43e-07	1.43e-07	1.25e-06
14165	CPD	0.224536	9.26e-10	9.26e-10	1.01e-08
3796	SKIL	0.224396	3.74e-08	3.74e-08	3.48e-07
5738	TREM1	0.223852	2.5e-08	2.5e-08	2.38e-07
16736	LAIR1	0.223778	1.8e-05	1.8e-05	0.000118237
1032	PDE4DIP	0.223732	7.83e-06	7.83e-06	5.4e-05
4864	AC123595.2	0.223416	5.96e-07	5.96e-07	4.83e-06
293	CLIC4	0.223381	4.72e-06	4.72e-06	3.37e-05
8489	CARD19	0.223311	1.15e-06	1.15e-06	8.99e-06
14228	CCL5	0.222996	1.39e-09	1.39e-09	1.5e-08
14215	SLFN11	0.222882	3.98e-05	3.98e-05	0.000244922
4262	PLAC8	0.222792	7.55e-08	7.55e-08	6.81e-07
13747	BANP	0.222662	1.01e-05	1.01e-05	6.9e-05
4045	WDR1	0.222507	1.37e-06	1.37e-06	1.06e-05
13230	METTL9	0.222213	2.06e-08	2.06e-08	1.98e-07
17218	AL021453.1	0.222111	7.56e-07	7.56e-07	6.05e-06
13741	MAP1LC3B	0.221827	1.24e-07	1.24e-07	1.1e-06
8798	RXRA	0.221822	5.35e-08	5.35e-08	4.92e-07
16755	FCAR	0.221765	3.67e-08	3.67e-08	3.43e-07
11520	N4BP2L1	0.221509	1.3e-05	1.3e-05	8.69e-05
13733	IRF8	0.221277	3.29e-05	3.29e-05	0.000206441
2575	TANK	0.221188	2.33e-08	2.33e-08	2.22e-07
8046	EXT1	0.221079	4.87e-07	4.87e-07	3.99e-06
3172	CTNNB1	0.220904	6.72e-06	6.72e-06	4.69e-05
11592	RB1	0.220055	2.89e-06	2.89e-06	2.13e-05
5226	CPEB4	0.219927	8.85e-09	8.85e-09	8.85e-08
4207	CXCL1	0.219289	1.78e-07	1.78e-07	1.54e-06
1064	PRPF3	0.219086	4.05e-06	4.05e-06	2.92e-05
16361	EGLN2	0.218887	2.44e-07	2.44e-07	2.08e-06
4971	FNIP1	0.218491	4.88e-09	4.88e-09	4.99e-08
5525	HLA-F	0.218446	5.4e-07	5.4e-07	4.39e-06
2554	NR4A2	0.218243	4.16e-06	4.16e-06	2.99e-05
6845	HILPDA	0.218137	4.89e-07	4.89e-07	4.01e-06
4729	ZSWIM6	0.217435	9.57e-07	9.57e-07	7.56e-06
1086	MLLT11	0.217097	2.72e-08	2.72e-08	2.58e-07
8176	PARP10	0.216663	8.67e-07	8.67e-07	6.9e-06
5380	PHACTR1	0.216632	1.37e-09	1.37e-09	1.47e-08
5659	RGL2	0.216594	2.57e-07	2.57e-07	2.18e-06
11425	LINC02376	0.216282	3.89e-06	3.89e-06	2.82e-05
3136	EPM2AIP1	0.2161	1.32e-06	1.32e-06	1.02e-05
16666	HAS1	0.21589	1.02e-07	1.02e-07	9.07e-07
5708	SRSF3	0.215867	5.57e-07	5.57e-07	4.52e-06
15870	DNM2	0.215554	5.89e-07	5.89e-07	4.77e-06
7737	DUSP4	0.215443	6.39e-07	6.39e-07	5.16e-06
14920	LDLRAD4	0.215311	3.36e-06	3.36e-06	2.45e-05
12499	EHD4	0.21514	1.21e-05	1.21e-05	8.12e-05
12726	TLE3	0.215103	8.87e-09	8.87e-09	8.87e-08
16528	NAPA	0.215034	2.6e-07	2.6e-07	2.21e-06
6236	DLL1	0.214592	3.73e-05	3.73e-05	0.000231266
3336	ALAS1	0.214274	3.1e-05	3.1e-05	0.000195804
5167	ADAM19	0.213803	3.37e-08	3.37e-08	3.16e-07
5096	ARHGAP26	0.213579	2.05e-08	2.05e-08	1.97e-07
14654	CD300LB	0.213539	4.29e-07	4.29e-07	3.55e-06
10353	AL391121.1	0.213228	1.16e-06	1.16e-06	9.04e-06
11137	DUSP6	0.212803	1.96e-05	1.96e-05	0.000128106
16727	MBOAT7	0.212552	1.93e-08	1.93e-08	1.87e-07
9906	OPTN	0.212448	5.16e-06	5.16e-06	3.66e-05
13951	POLR2A	0.212312	3.22e-08	3.22e-08	3.04e-07
1299	SLAMF1	0.212066	1.05e-05	1.05e-05	7.12e-05
15098	NFATC1	0.212015	6.83e-06	6.83e-06	4.75e-05
15608	CNN2	0.211509	2.08e-08	2.08e-08	2e-07
9111	ABTB2	0.211506	5.99e-07	5.99e-07	4.84e-06
10491	ADAM8	0.211257	1.38e-07	1.38e-07	1.21e-06
6798	DOCK4	0.210966	1.13e-06	1.13e-06	8.81e-06
10603	CLEC4D	0.210956	1.54e-07	1.54e-07	1.35e-06
5295	MGAT1	0.210941	4e-06	4e-06	2.89e-05
8571	AKAP2	0.21016	2.32e-05	2.32e-05	0.000149405
9015	AC080023.1	0.21011	3e-06	3e-06	2.2e-05
11365	LINC01089	0.209991	4.03e-06	4.03e-06	2.91e-05
10352	TRIM8	0.20966	1.08e-05	1.08e-05	7.32e-05
14865	SMCHD1	0.209532	5.25e-11	5.25e-11	6.43e-10
14268	CWC25	0.209503	5.14e-07	5.14e-07	4.19e-06
16785	SSC5D	0.209081	2.31e-06	2.31e-06	1.73e-05
9580	AP003086.1	0.208971	1.58e-06	1.58e-06	1.21e-05
10852	FMNL3	0.208969	8.55e-05	8.55e-05	0.000499412
2377	IL1R1	0.208572	1.15e-06	1.15e-06	8.99e-06
6215	QKI	0.208219	5.42e-06	5.42e-06	3.83e-05
16424	KCNN4	0.208017	0.000138619	0.000138619	0.000778618
13206	COQ7	0.207962	1.03e-08	1.03e-08	1.03e-07
14202	CCL7	0.20795	0.000267551	0.000267551	0.00141456
9632	MAML2	0.207891	1.11e-06	1.11e-06	8.66e-06
16078	ELL	0.207451	4.46e-07	4.46e-07	3.67e-06
8530	TRIM14	0.206973	5.52e-07	5.52e-07	4.49e-06
1402	PRRC2C	0.206638	7.22e-07	7.22e-07	5.8e-06
16349	SHKBP1	0.206607	1.46e-07	1.46e-07	1.28e-06
4337	TET2	0.206574	4.03e-06	4.03e-06	2.91e-05
3877	RTP4	0.20655	2.65e-07	2.65e-07	2.25e-06
15728	TICAM1	0.206447	1.62e-06	1.62e-06	1.24e-05
13408	ITGAM	0.206362	9.03e-06	9.03e-06	6.18e-05
16611	NUP62	0.206352	4.9e-05	4.9e-05	0.000297646
16665	SPACA6	0.206225	6.46e-07	6.46e-07	5.21e-06
14262	MLLT6	0.2061	7.36e-07	7.36e-07	5.9e-06
6586	POMZP3	0.206027	4.43e-05	4.43e-05	0.000271553
6483	PURB	0.205936	3.84e-06	3.84e-06	2.78e-05
10380	ITPRIP	0.205662	5.53e-08	5.53e-08	5.07e-07
12655	LACTB	0.205519	1.3e-05	1.3e-05	8.66e-05
12111	SUSD6	0.205491	2.06e-06	2.06e-06	1.55e-05
192	ZBTB17	0.2053	3.89e-05	3.89e-05	0.000239984
334	SLC9A1	0.205183	1.93e-07	1.93e-07	1.66e-06
13782	SPATA2L	0.205007	3.49e-06	3.49e-06	2.54e-05
11601	PHF11	0.204898	4.21e-07	4.21e-07	3.49e-06
9227	MS4A14	0.204892	0.00016577	0.00016577	0.000914731
16608	AKT1S1	0.204732	4.26e-05	4.26e-05	0.000261205
9465	UNC93B1	0.20467	6.01e-05	6.01e-05	0.000360715
1237	C1orf61	0.204553	2.87e-08	2.87e-08	2.72e-07
14299	RARA	0.20454	2.11e-06	2.11e-06	1.59e-05
10300	AL353719.1	0.204306	2.15e-05	2.15e-05	0.000138854
15864	CDKN2D	0.204035	7.75e-08	7.75e-08	6.98e-07
6777	AC007032.1	0.20403	1.18e-08	1.18e-08	1.17e-07
15604	ARID3A	0.203823	8.39e-06	8.39e-06	5.76e-05
976	FCGR1B	0.203612	1.78e-06	1.78e-06	1.36e-05
14441	KPNB1	0.203463	1.26e-06	1.26e-06	9.77e-06
10761	FGD4	0.203231	1.06e-07	1.06e-07	9.44e-07
9616	PANX1	0.202612	0.000108349	0.000108349	0.000621521
16007	HSH2D	0.202574	1.2e-11	1.2e-11	1.55e-10
1166	RPS27	0.202357	1.87e-06	1.87e-06	1.41e-05
7710	AC120193.1	0.202274	6.88e-05	6.88e-05	0.000408555
177	EFHD2	0.202273	1.19e-05	1.19e-05	8.03e-05
12556	BLOC1S6	0.202239	6.18e-06	6.18e-06	4.33e-05
13394	ZNF646	0.202049	9.57e-07	9.57e-07	7.56e-06
5007	SEC24A	0.202049	3.09e-06	3.09e-06	2.26e-05
1030	NBPF14	0.201977	8.72e-06	8.72e-06	5.98e-05
5242	HK3	0.201721	6.94e-05	6.94e-05	0.000411724
16054	JAK3	0.201665	1.09e-08	1.09e-08	1.08e-07
6184	DYNLT1	0.20153	3.58e-06	3.58e-06	2.6e-05
13136	C16orf72	0.201274	2.98e-06	2.98e-06	2.19e-05
6260	MICALL2	0.201263	8.2e-06	8.2e-06	5.64e-05
1168	TPM3	0.20099	8.17e-06	8.17e-06	5.62e-05
6637	FAM133B	0.200951	6.33e-06	6.33e-06	4.43e-05
11936	RALGAPA1	0.200912	5.89e-08	5.89e-08	5.37e-07
11287	TRAFD1	0.20055	6.52e-07	6.52e-07	5.25e-06
1050	HIST2H2AC	0.200284	8.62e-07	8.62e-07	6.86e-06
7560	IRAK1	0.200251	2.05e-05	2.05e-05	0.000132716
9715	SIK3	0.20023	7.87e-06	7.87e-06	5.42e-05
16028	USE1	0.200042	3.68e-05	3.68e-05	0.000228621
13153	LITAF	0.199927	1.5e-06	1.5e-06	1.15e-05
4723	ELOVL7	0.199796	0.000105011	0.000105011	0.000603553
5539	GNL1	0.199711	7.44e-06	7.44e-06	5.15e-05
3004	EDEM1	0.199164	3.82e-05	3.82e-05	0.000236119
13971	CYB5D1	0.198914	3.27e-06	3.27e-06	2.39e-05
10398	ACSL5	0.198801	1.06e-05	1.06e-05	7.18e-05
3266	DALRD3	0.198214	2.33e-05	2.33e-05	0.000149632
2444	CBWD2	0.198162	2.88e-05	2.88e-05	0.000182907
15908	ZNF844	0.198119	7.7e-07	7.7e-07	6.15e-06
7893	MSC	0.197895	0.000267857	0.000267857	0.0014157
1039	HIST2H2BF	0.197777	9.71e-07	9.71e-07	7.67e-06
15109	ADNP2	0.197655	3.48e-06	3.48e-06	2.53e-05
7251	PIM2	0.197505	7.36e-10	7.36e-10	8.13e-09
7533	MAMLD1	0.197486	1.41e-05	1.41e-05	9.38e-05
15064	SERPINB10	0.197432	4.23e-08	4.23e-08	3.92e-07
4287	PPM1K	0.197423	1.53e-06	1.53e-06	1.18e-05
17000	ADORA2A	0.197179	1.28e-06	1.28e-06	9.9e-06
10232	IFIT5	0.19706	6.12e-08	6.12e-08	5.57e-07
11387	HCAR3	0.196918	7.31e-14	7.31e-14	1.12e-12
7230	ELK1	0.196439	5.58e-05	5.58e-05	0.000336698
3686	XRN1	0.196372	4.29e-07	4.29e-07	3.55e-06
4892	CHD1	0.196367	5.41e-08	5.41e-08	4.95e-07
4959	2021-03-03	0.195771	1.12e-06	1.12e-06	8.76e-06
7090	CRLF2	0.195724	3.06e-06	3.06e-06	2.25e-05
8779	RALGDS	0.195577	1.96e-08	1.96e-08	1.89e-07
11159	CRADD	0.195455	0.000144418	0.000144418	0.0008068
7794	GPAT4	0.195392	2.38e-06	2.38e-06	1.78e-05
10637	GABARAPL1	0.195212	5.65e-06	5.65e-06	3.99e-05
10170	ZNF503	0.195164	5.86e-05	5.86e-05	0.000352653
7052	NUB1	0.194962	1.63e-06	1.63e-06	1.25e-05
6925	BRAF	0.194813	1.62e-06	1.62e-06	1.24e-05
3879	BCL6	0.194703	1.2e-07	1.2e-07	1.06e-06
4258	THAP9-AS1	0.194634	1.03e-06	1.03e-06	8.11e-06
1127	SPRR3	0.194517	6.03e-25	6.03e-25	2.11e-23
10604	CLEC4E	0.19395	1.05e-06	1.05e-06	8.2e-06
10809	VDR	0.193945	2e-05	2e-05	0.000129773
12694	DENND4A	0.19334	3.28e-06	3.28e-06	2.39e-05
5137	SMIM3	0.193329	0.000318395	0.000318395	0.00165594
10991	STAT2	0.193178	3.28e-05	3.28e-05	0.000206182
1613	LAMB3	0.19315	1.79e-06	1.79e-06	1.36e-05
5581	PRRC2A	0.192872	8.54e-06	8.54e-06	5.87e-05
11976	LINC01588	0.192769	0.000320735	0.000320735	0.00166613
3729	MBNL1	0.192489	4.22e-05	4.22e-05	0.000259109
8955	NUP98	0.192467	4.45e-07	4.45e-07	3.66e-06
14603	DDX5	0.192168	6.77e-06	6.77e-06	4.72e-05
15642	CSNK1G2	0.192141	4.38e-06	4.38e-06	3.14e-05
8455	TUT7	0.192101	6.11e-06	6.11e-06	4.29e-05
12657	RAB8B	0.19195	7.04e-06	7.04e-06	4.89e-05
15215	RRBP1	0.191861	7.96e-05	7.96e-05	0.000467265
14812	SIRT7	0.191684	2e-06	2e-06	1.51e-05
9347	ATG2A	0.191598	2.81e-11	2.81e-11	3.52e-10
7434	ACSL4	0.191418	0.000174631	0.000174631	0.000958802
2794	KANSL1L	0.191331	3.24e-05	3.24e-05	0.000203904
17418	KCNE1	0.191277	2.95e-05	2.95e-05	0.000186713
14330	CNP	0.190732	0.000160153	0.000160153	0.000885687
3537	ADPRH	0.190382	0.000183715	0.000183715	0.00100272
5552	FLOT1	0.190375	1.78e-06	1.78e-06	1.35e-05
2431	SLC20A1	0.190305	1.53e-06	1.53e-06	1.18e-05
10833	DDN-AS1	0.19017	8.03e-06	8.03e-06	5.53e-05
6558	LAT2	0.190121	1.79e-05	1.79e-05	0.000117439
13414	ARMC5	0.189952	2.39e-05	2.39e-05	0.000153434
10868	DIP2B	0.18934	5.07e-06	5.07e-06	3.6e-05
15002	SMAD7	0.189252	0.000256293	0.000256293	0.00135995
5068	APBB3	0.188209	8.15e-05	8.15e-05	0.000477829
3425	FOXP1	0.188128	5.95e-06	5.95e-06	4.18e-05
11138	AC024909.2	0.188035	0.0001857	0.0001857	0.00101198
14467	UBE2Z	0.187971	0.000120051	0.000120051	0.000683064
67	TNFRSF14	0.187869	3.3e-06	3.3e-06	2.41e-05
156	MTHFR	0.187808	4.52e-05	4.52e-05	0.000276603
16411	LYPD3	0.187791	6.99e-06	6.99e-06	4.86e-05
1374	RCSD1	0.187743	4.33e-05	4.33e-05	0.000265478
17050	LIF	0.187739	1.03e-06	1.03e-06	8.09e-06
5411	DEK	0.187729	5.94e-05	5.94e-05	0.000357165
9123	LDLRAD3	0.187647	0.000725156	0.000725156	0.00345137
1387	BLZF1	0.187533	2.01e-05	2.01e-05	0.000130309
13969	TMEM88	0.187345	1.76e-05	1.76e-05	0.000115753
7717	PPP2R2A	0.187221	4.57e-06	4.57e-06	3.27e-05
10122	VSIR	0.187122	9.13e-07	9.13e-07	7.24e-06
10755	AC023157.3	0.187111	3.16e-11	3.16e-11	3.93e-10
8177	GRINA	0.187077	1.08e-05	1.08e-05	7.32e-05
2715	PGAP1	0.187065	1.2e-05	1.2e-05	8.07e-05
13021	RPS2	0.186713	6.81e-05	6.81e-05	0.000404882
16417	IRGQ	0.186507	3.89e-05	3.89e-05	0.000240032
13709	OSGIN1	0.18649	8.74e-06	8.74e-06	5.99e-05
10822	CCNT1	0.186463	5.31e-06	5.31e-06	3.77e-05
1422	RABGAP1L	0.185783	1.71e-07	1.71e-07	1.48e-06
4406	SCLT1	0.185573	3.66e-06	3.66e-06	2.65e-05
12863	AKAP13	0.185459	3.84e-05	3.84e-05	0.000237209
10962	MMP19	0.185402	0.00058184	0.00058184	0.00283617
15041	MALT1	0.185344	0.000125959	0.000125959	0.000714593
346	STX12	0.185277	0.00017698	0.00017698	0.000969068
1610	MIR29B2CHG	0.185164	1.98e-05	1.98e-05	0.000128693
15685	FZR1	0.184977	9.45e-06	9.45e-06	6.45e-05
12134	PSEN1	0.184749	1.71e-05	1.71e-05	0.00011201
5794	C6orf223	0.184643	3.12e-05	3.12e-05	0.000196571
15922	ZNF791	0.184546	1.95e-05	1.95e-05	0.000127286
3997	SH3BP2	0.184504	2.26e-05	2.26e-05	0.000145572
15856	ICAM3	0.184421	2.56e-10	2.56e-10	2.97e-09
11582	RUBCNL	0.184286	1.17e-05	1.17e-05	7.89e-05
8629	PHF19	0.184154	2.28e-05	2.28e-05	0.000146857
11322	TAOK3	0.18414	0.000151342	0.000151342	0.000841212
16667	FPR1	0.183986	7.11e-06	7.11e-06	4.93e-05
14835	SECTM1	0.18374	3.54e-07	3.54e-07	2.97e-06
8436	TLE4	0.183649	6.78e-05	6.78e-05	0.000403693
11515	HSPH1	0.183492	0.000131124	0.000131124	0.000740073
8000	PABPC1	0.183377	4.72e-05	4.72e-05	0.000288073
6685	ZKSCAN1	0.183068	6.11e-06	6.11e-06	4.29e-05
1419	RC3H1	0.18285	3.32e-05	3.32e-05	0.000208314
14770	ENDOV	0.182778	7.7e-05	7.7e-05	0.000452907
7507	INTS6L	0.182643	3.81e-05	3.81e-05	0.000235884
16853	ZNF274	0.182619	2.5e-05	2.5e-05	0.000159721
6400	ZNRF2	0.182495	0.000403091	0.000403091	0.00204375
5324	AL031963.3	0.182469	1.24e-05	1.24e-05	8.35e-05
5921	AL353135.1	0.182388	6.34e-05	6.34e-05	0.000378817
6750	POLR2J3-1	0.182152	3.19e-05	3.19e-05	0.000200911
7777	AC087623.3	0.182098	1.98e-05	1.98e-05	0.000128693
5605	NEU1	0.181826	1.31e-05	1.31e-05	8.76e-05
9116	AL356215.1	0.181151	2.37e-05	2.37e-05	0.000152211
13651	DHX38	0.180639	0.000247084	0.000247084	0.00131706
8014	AZIN1	0.180473	2.44e-05	2.44e-05	0.000156222
13435	N4BP1	0.180387	6.82e-07	6.82e-07	5.49e-06
15499	ZBP1	0.180303	8.95e-14	8.95e-14	1.37e-12
7227	SYN1	0.180275	0.000131415	0.000131415	0.000741446
8405	TJP2	0.180268	7.94e-05	7.94e-05	0.00046639
7171	KLHL15	0.179818	1.95e-05	1.95e-05	0.000127214
10060	UBE2D1	0.179684	0.000108984	0.000108984	0.000624755
5450	HIST1H2AC	0.179538	8.18e-05	8.18e-05	0.000479436
1635	AC092803.2	0.179399	6.39e-05	6.39e-05	0.000381368
990	NBPF15	0.179088	2.85e-05	2.85e-05	0.000180875
14418	FMNL1	0.179065	2.77e-06	2.77e-06	2.05e-05
7718	BNIP3L	0.178714	0.000249547	0.000249547	0.00132857
11468	LATS2	0.178641	3.74e-05	3.74e-05	0.000231755
14655	CD300C	0.178548	0.00139208	0.00139208	0.00615343
2898	SP100	0.178545	1.25e-05	1.25e-05	8.36e-05
4448	PRMT9	0.178527	0.000468701	0.000468701	0.00233459
5556	LINC00243	0.17845	9.98e-07	9.98e-07	7.86e-06
17526	LSS	0.178421	0.000660415	0.000660415	0.00317335
15500	PMEPA1	0.178332	3.66e-05	3.66e-05	0.000227733
11007	STAT6	0.178193	5.96e-05	5.96e-05	0.000358125
3140	GOLGA4	0.178096	0.000123963	0.000123963	0.000703724
13646	IST1	0.177858	6.67e-05	6.67e-05	0.000397005
4536	CENPU	0.177734	0.000111665	0.000111665	0.000639289
4114	N4BP2	0.17743	0.000147355	0.000147355	0.000821121
10666	CDKN1B	0.177403	2.43e-06	2.43e-06	1.81e-05
17037	EWSR1	0.177378	9.67e-05	9.67e-05	0.000559201
8294	C9orf72	0.176834	5.32e-06	5.32e-06	3.77e-05
14681	GRB2	0.176683	9.4e-05	9.4e-05	0.000545104
2449	AC110769.2	0.176658	0.000102869	0.000102869	0.000592078
15820	MYO1F	0.176578	9.67e-06	9.67e-06	6.6e-05
8858	TOR4A	0.176526	0.000191023	0.000191023	0.00103777
5207	KCNMB1	0.176495	0.000387758	0.000387758	0.00197285
17315	ODF3B	0.176357	0.000150728	0.000150728	0.000838584
6570	HIP1	0.176246	3.87e-05	3.87e-05	0.000238889
14576	TLK2	0.176203	3.09e-05	3.09e-05	0.000195345
4316	DAPP1	0.176051	2.55e-06	2.55e-06	1.9e-05
6641	SAMD9L	0.175843	1.71e-06	1.71e-06	1.3e-05
11764	RNASE2	0.175467	0.00135794	0.00135794	0.00601915
11570	TPT1	0.17514	3.44e-05	3.44e-05	0.000215489
13348	CORO1A	0.175019	1.02e-06	1.02e-06	8.04e-06
652	SSBP3	0.174961	0.000339797	0.000339797	0.00175477
7315	STARD8	0.174726	0.00056799	0.00056799	0.00277714
2745	CASP8	0.174583	1.15e-05	1.15e-05	7.75e-05
8767	RAPGEF1	0.17451	0.000275838	0.000275838	0.00145181
13	AL645608.2	0.17432	3.48e-06	3.48e-06	2.53e-05
8522	TDRD7	0.174225	2.93e-05	2.93e-05	0.000185818
15703	EBI3	0.174075	0.000886614	0.000886614	0.00413572
11494	RASL11A	0.173995	0.000150218	0.000150218	0.000836275
5257	PDLIM7	0.173832	2.46e-05	2.46e-05	0.000157453
6431	TRGC2	0.173811	2.95e-05	2.95e-05	0.000186713
5136	DCTN4	0.173808	0.00011994	0.00011994	0.000682656
5578	LST1	0.173553	2.13e-05	2.13e-05	0.000137886
17104	APOL2	0.173454	4.66e-05	4.66e-05	0.000284925
7803	AC083973.1	0.173338	3.14e-06	3.14e-06	2.3e-05
5205	AC034199.1	0.173299	3.83e-06	3.83e-06	2.77e-05
8293	MOB3B	0.173244	0.000670995	0.000670995	0.00322155
15602	R3HDM4	0.173227	3.7e-07	3.7e-07	3.09e-06
16749	LILRB4	0.173154	0.00106828	0.00106828	0.0048718
12832	TLNRD1	0.173049	0.000882023	0.000882023	0.00411869
163	TNFRSF8	0.173041	9.53e-06	9.53e-06	6.51e-05
2825	SLC11A1	0.172868	0.000150594	0.000150594	0.000838104
6591	PTPN12	0.172517	0.000204846	0.000204846	0.0011067
3434	PPP4R2	0.172479	5.92e-05	5.92e-05	0.000356135
17441	DYRK1A	0.17246	6.85e-05	6.85e-05	0.000406943
5323	RIPK1	0.172395	6.19e-05	6.19e-05	0.000370483
2194	DYSF	0.172208	1.56e-06	1.56e-06	1.19e-05
4862	AC123595.1	0.171957	3.35e-05	3.35e-05	0.000209754
9859	KLF6	0.17193	6.47e-05	6.47e-05	0.000385647
4745	ERBIN	0.17158	5.43e-06	5.43e-06	3.84e-05
13788	TCF25	0.171565	0.000110187	0.000110187	0.000631446
33	CCNL2	0.171377	0.00019523	0.00019523	0.001058
17102	APOL3	0.171365	0.000652972	0.000652972	0.00314235
5346	F13A1	0.171196	6.18e-05	6.18e-05	0.00037023
3529	ARHGAP31	0.171122	0.000545403	0.000545403	0.00267564
4487	2021-03-01	0.171062	0.00206153	0.00206153	0.00873005
3632	ATP2C1	0.170763	0.00145981	0.00145981	0.0064092
3565	PARP9	0.170714	1.96e-05	1.96e-05	0.000127788
1789	KMO	0.170708	0.00229189	0.00229189	0.00958074
5609	CFB	0.17069	5.88e-05	5.88e-05	0.000353952
15432	ELMO2	0.170599	8.84e-05	8.84e-05	0.000515516
13753	MVD	0.170591	0.000136587	0.000136587	0.000767696
7091	CSF2RA	0.170564	0.000126651	0.000126651	0.000717823
2674	ITGAV	0.170517	0.00140829	0.00140829	0.00621346
14917	PTPN2	0.170291	0.000559958	0.000559958	0.00274092
863	WDR47	0.170247	8.42e-05	8.42e-05	0.000492263
1481	PACERR	0.170082	7.23e-05	7.23e-05	0.00042715
7161	RPS6KA3	0.169915	0.000445307	0.000445307	0.00223009
12766	CLK3	0.169893	3.71e-05	3.71e-05	0.00022989
1471	FAM129A	0.169797	5.37e-07	5.37e-07	4.37e-06
15311	MAP1LC3A	0.169631	0.000118	0.000118	0.000672268
12295	CCNK	0.169385	0.000137521	0.000137521	0.000772699
2896	SP140	0.169308	4.02e-07	4.02e-07	3.34e-06
1034	NBPF9	0.169099	0.000160917	0.000160917	0.00088963
8344	RMRP	0.169033	3.52e-05	3.52e-05	0.000219492
773	PKN2	0.168836	5.41e-05	5.41e-05	0.000327676
14598	SNHG25	0.168803	0.000416694	0.000416694	0.0021024
1781	LGALS8-AS1	0.168677	5.88e-06	5.88e-06	4.14e-05
12139	AC005280.2	0.168611	0.000275774	0.000275774	0.00145181
2695	NAB1	0.168176	0.000158476	0.000158476	0.000877239
11929	FAM177A1	0.168138	2.87e-05	2.87e-05	0.000182239
10058	IPMK	0.16772	0.000249725	0.000249725	0.00132911
9965	ABI1	0.167382	0.00036738	0.00036738	0.00188171
2823	TMBIM1	0.167219	0.000170481	0.000170481	0.000938957
2327	NEURL3	0.166572	6.72e-06	6.72e-06	4.69e-05
11773	HNRNPC	0.166494	9.33e-05	9.33e-05	0.000541391
3369	SELENOK	0.166169	0.000372865	0.000372865	0.00190647
16719	OSCAR	0.166005	0.00107628	0.00107628	0.00490443
12595	MAPK6	0.165968	0.000317965	0.000317965	0.00165419
9177	CELF1	0.165899	0.000376177	0.000376177	0.00192172
9195	UBE2L6	0.165844	0.000176725	0.000176725	0.000968486
2318	ASTL	0.16575	2.32e-05	2.32e-05	0.000149563
13071	TNFRSF12A	0.165682	4.9e-05	4.9e-05	0.000297646
15930	TRIR	0.165124	0.000331324	0.000331324	0.00171707
11835	RBM23	0.165115	0.00010137	0.00010137	0.000583967
10669	GPRC5A	0.164906	2.84e-09	2.84e-09	2.96e-08
5374	NEDD9	0.164793	2.44e-07	2.44e-07	2.08e-06
7723	CLU	0.164779	0.000330465	0.000330465	0.00171363
2137	AC008074.3	0.164608	1.48e-05	1.48e-05	9.79e-05
6166	MTRF1L	0.164176	0.0015343	0.0015343	0.00670609
14612	PRKCA	0.164128	0.00019929	0.00019929	0.00107934
9191	SLC43A3	0.16399	0.000225595	0.000225595	0.00121134
1640	BATF3	0.163939	0.00119208	0.00119208	0.00537631
3065	SLC6A6	0.163899	9.65e-05	9.65e-05	0.000558051
9578	GAB2	0.163544	0.000478018	0.000478018	0.00237316
4666	AC025171.3	0.163308	3.89e-05	3.89e-05	0.000239984
4420	MAML3	0.163256	8.92e-05	8.92e-05	0.000519106
5895	TENT5A	0.163224	0.000462599	0.000462599	0.00230682
3900	TMEM44-AS1	0.163091	0.000659574	0.000659574	0.00317018
16484	QPCTL	0.162883	3.07e-05	3.07e-05	0.000194042
11	HES4	0.162848	3.26e-07	3.26e-07	2.74e-06
6339	TWISTNB	0.162769	0.00133957	0.00133957	0.00594974
5547	PPP1R18	0.162649	0.000194141	0.000194141	0.00105308
1015	NOTCH2NL	0.162579	0.000128427	0.000128427	0.000726954
8824	SNHG7	0.162573	0.00062398	0.00062398	0.00301811
9386	AP5B1	0.161997	3.3e-05	3.3e-05	0.000207335
15318	TRPC4AP	0.161978	0.000214938	0.000214938	0.00115766
4054	CPEB2	0.161822	0.000412917	0.000412917	0.00208514
16731	LILRA6	0.161731	0.000675587	0.000675587	0.00324005
11873	IRF9	0.16173	1.87e-05	1.87e-05	0.000121968
7479	ELF4	0.161652	0.000200835	0.000200835	0.00108704
11607	DLEU2	0.161511	0.000112385	0.000112385	0.000642988
3925	UBXN7	0.161249	0.000409429	0.000409429	0.0020705
1159	CRTC2	0.161137	8.75e-05	8.75e-05	0.000510818
6253	ADAP1	0.161032	0.000730638	0.000730638	0.00347558
7098	AKAP17A	0.160934	0.000401881	0.000401881	0.00203879
10108	SAR1A	0.16065	0.000897955	0.000897955	0.0041864
10615	KLRG1	0.160597	3.03e-05	3.03e-05	0.000191877
9302	SLC3A2	0.160537	0.000191715	0.000191715	0.00104121
12680	PLEKHO2	0.160505	0.000107911	0.000107911	0.000619209
5718	TMEM217	0.160444	0.000805044	0.000805044	0.00378845
15165	SIGLEC1	0.160304	0.00426637	0.00426637	0.0164155
1049	HIST2H2BE	0.160254	9.24e-05	9.24e-05	0.000536504
9054	AC124798.1	0.160205	0.000234624	0.000234624	0.0012556
13407	TRIM72	0.159827	1.03e-05	1.03e-05	7.01e-05
1013	NBPF10	0.159758	0.000312872	0.000312872	0.00163011
5459	HIST1H2BG	0.159683	7.46e-05	7.46e-05	0.000440061
3768	KPNA4	0.159616	0.000293267	0.000293267	0.00153571
9941	NSUN6	0.159592	7.5e-05	7.5e-05	0.000442148
12914	AC106028.4	0.159511	0.000107726	0.000107726	0.00061835
219	IFFO2	0.159418	0.000346954	0.000346954	0.0017891
7207	KDM6A	0.159253	0.000305308	0.000305308	0.00159354
9653	CASP5	0.159114	6.14e-05	6.14e-05	0.000368412
6677	ZNF394	0.159038	4.15e-05	4.15e-05	0.000254994
13959	MPDU1	0.158907	0.00142114	0.00142114	0.00626296
7551	ABCD1	0.158824	0.00357618	0.00357618	0.01409
6583	DTX2	0.15852	0.000339796	0.000339796	0.00175477
14866	EMILIN2	0.158412	0.00285439	0.00285439	0.0115631
14332	NKIRAS2	0.15823	0.00139402	0.00139402	0.00616042
5533	TRIM26	0.158045	0.000207588	0.000207588	0.00112117
8559	FSD1L	0.157719	0.00321391	0.00321391	0.0128418
3889	IL1RAP	0.157711	2.26e-05	2.26e-05	0.000145701
9976	WAC	0.157693	0.000178671	0.000178671	0.000977012
1903	RHOB	0.157496	0.000508544	0.000508544	0.00251096
9108	LMO2	0.157415	0.00218183	0.00218183	0.00918575
8968	TRIM5	0.157312	0.000153775	0.000153775	0.000853371
7759	RNF122	0.157248	6.18e-05	6.18e-05	0.00037023
5378	HIVEP1	0.157195	0.00026032	0.00026032	0.00137882
14545	2021-09-04	0.157054	8.41e-05	8.41e-05	0.000492005
10154	ZSWIM8	0.156939	0.00017955	0.00017955	0.000980906
14689	SAP30BP	0.156521	0.000850692	0.000850692	0.00398605
6407	GARS	0.156507	0.000486351	0.000486351	0.00240952
13085	LINC00921	0.156486	5.68e-06	5.68e-06	4e-05
13295	ATXN2L	0.156418	0.00027095	0.00027095	0.00142994
1977	AC104695.3	0.156325	2.08e-05	2.08e-05	0.000135168
12779	C15orf39	0.156301	4.72e-05	4.72e-05	0.00028822
7221	UBA1	0.156128	0.000749105	0.000749105	0.00355572
4362	FAM241A	0.156021	1.28e-05	1.28e-05	8.55e-05
5439	HIST1H3A	0.155962	0.000124999	0.000124999	0.00070938
4716	GPBP1	0.155802	3.44e-05	3.44e-05	0.000215444
16461	RELB	0.155534	0.000471009	0.000471009	0.0023421
14574	MED13	0.155212	0.000936806	0.000936806	0.00434216
11067	IRAK3	0.154968	0.000121683	0.000121683	0.000691678
8753	NCS1	0.154448	0.000637725	0.000637725	0.00307818
3134	TRANK1	0.154289	5.49e-05	5.49e-05	0.00033172
10226	CH25H	0.154229	0.000707577	0.000707577	0.00337778
14213	SLFN5	0.154212	0.000120873	0.000120873	0.000687517
9982	ZNF438	0.15414	9.3e-05	9.3e-05	0.000539797
6425	AOAH	0.154018	0.000515852	0.000515852	0.00254633
10156	NDST2	0.154005	0.0022756	0.0022756	0.00952401
6371	AC004520.1	0.153746	0.000382659	0.000382659	0.00195029
12892	SEMA4B	0.153731	0.000102879	0.000102879	0.000592078
5223	CREBRF	0.153572	1.35e-05	1.35e-05	8.98e-05
16523	DHX34	0.153551	3.66e-05	3.66e-05	0.000227697
13446	NOD2	0.153437	0.000161644	0.000161644	0.000893368
1389	SLC19A2	0.153378	0.00233485	0.00233485	0.00973252
15932	HOOK2	0.153306	1.06e-05	1.06e-05	7.22e-05
5302	TRIM41	0.153257	0.000643576	0.000643576	0.00310178
6864	UBE2H	0.153199	0.000130945	0.000130945	0.000739776
8063	ZHX2	0.15305	0.000275	0.000275	0.00144914
9796	NRGN	0.153011	0.000596493	0.000596493	0.00290276
8175	PLEC	0.152975	0.000918607	0.000918607	0.00426916
3638	ACPP	0.152929	0.00080373	0.00080373	0.00378386
13022	SNHG9	0.15288	0.000467381	0.000467381	0.00232868
14423	PLEKHM1	0.152768	0.000127186	0.000127186	0.000720393
8870	LINC01001	0.152756	6.66e-07	6.66e-07	5.36e-06
10302	ENTPD7	0.152709	0.000720771	0.000720771	0.00343423
15188	GPCPD1	0.15266	0.000667959	0.000667959	0.00320785
14797	HGS	0.152396	0.000750022	0.000750022	0.00355911
1239	MEF2D	0.152323	0.000443031	0.000443031	0.00222123
1771	TBCE	0.15232	0.000216757	0.000216757	0.00116674
13244	NPIPB5	0.152218	0.000281531	0.000281531	0.00147867
15387	OSER1	0.152152	8.87e-05	8.87e-05	0.000516489
8136	ADGRB1	0.152145	0.000157702	0.000157702	0.000874057
8130	AC040970.1	0.152103	0.000379516	0.000379516	0.00193596
5121	CSNK1A1	0.152086	0.000833766	0.000833766	0.00391417
4865	ARRDC3	0.152044	0.00102524	0.00102524	0.00469747
16325	SUPT5H	0.151857	0.000254806	0.000254806	0.0013537
2710	HECW2	0.151812	8.68e-07	8.68e-07	6.9e-06
15628	C19orf25	0.151745	0.00097217	0.00097217	0.00449066
15813	ANGPTL4	0.151734	0.000154458	0.000154458	0.000856888
454	SH3D21	0.151725	9.59e-05	9.59e-05	0.00055476
122	SPSB1	0.151657	0.00217703	0.00217703	0.0091727
17317	U62317.5	0.151596	0.000106643	0.000106643	0.000612533
8997	RPL27A	0.151545	0.00142027	0.00142027	0.00626067
7336	OGT	0.151531	9.83e-05	9.83e-05	0.000567256
7918	ZBTB10	0.151505	0.00271807	0.00271807	0.0110722
14192	ZNF207	0.15139	0.00080365	0.00080365	0.00378386
693	JAK1	0.15138	0.000920416	0.000920416	0.00427409
11386	HCAR2	0.151325	5.23e-08	5.23e-08	4.81e-07
4831	ZFYVE16	0.150842	0.000331628	0.000331628	0.00171814
1726	RHOU	0.150776	0.00343753	0.00343753	0.0136144
15679	AC005264.1	0.150656	0.000376883	0.000376883	0.00192477
17031	CCDC117	0.150613	0.000615403	0.000615403	0.00298238
2569	2021-03-07	0.150606	0.000297977	0.000297977	0.00155805
1175	IL6R-AS1	0.15058	1.44e-05	1.44e-05	9.52e-05
8746	PTGES	0.150552	0.00316064	0.00316064	0.0126548
15180	PRNP	0.15044	0.00134351	0.00134351	0.00596575
7691	BIN3	0.150425	0.000483075	0.000483075	0.00239396
3220	CCR5	0.150195	0.00295013	0.00295013	0.0119016
10989	PAN2	0.150122	0.000516773	0.000516773	0.00255016
16040	BST2	0.150054	0.00147635	0.00147635	0.00647376
5496	HIST1H2AL	0.149896	9.42e-05	9.42e-05	0.000546061
10658	BCL2L14	0.149674	9.55e-05	9.55e-05	0.000553318
17165	AL021707.6	0.149613	4.46e-07	4.46e-07	3.67e-06
15483	ZNF217	0.149578	0.000368022	0.000368022	0.0018839
16729	RPS9	0.149466	0.000445872	0.000445872	0.00223228
14188	AC116407.2	0.149427	2.37e-05	2.37e-05	0.000152019
5494	HIST1H2BN	0.149391	2.64e-05	2.64e-05	0.000168222
13490	NLRC5	0.149351	4.94e-05	4.94e-05	0.000300124
10469	PTPRE	0.14927	0.00078618	0.00078618	0.00371163
7252	OTUD5	0.14914	0.000187993	0.000187993	0.00102289
3833	LAMP3	0.149134	0.0010102	0.0010102	0.0046431
7124	TLR8	0.148985	0.00231224	0.00231224	0.00964973
152	MAD2L2	0.148977	0.00339765	0.00339765	0.0134844
6273	LFNG	0.148844	0.0022947	0.0022947	0.00958596
5624	GPSM3	0.148793	0.000179013	0.000179013	0.000978577
6526	ASL	0.14869	0.00241587	0.00241587	0.0100203
16519	CCDC9	0.148481	0.000302795	0.000302795	0.00158136
12215	GTF2A1	0.148227	0.000380518	0.000380518	0.00194051
16041	BISPR	0.148122	0.000748483	0.000748483	0.00355373
3566	DTX3L	0.14799	0.000245257	0.000245257	0.00130851
15624	DAZAP1	0.147986	0.00222568	0.00222568	0.00934177
14568	USP32	0.147922	0.000426573	0.000426573	0.00214792
15720	LRG1	0.147889	2.04e-07	2.04e-07	1.75e-06
13284	APOBR	0.147713	0.000176852	0.000176852	0.000968879
15614	STK11	0.147524	0.00197818	0.00197818	0.00841748
9479	IGHMBP2	0.147479	0.00101542	0.00101542	0.00466098
14898	RAB31	0.147476	0.00263924	0.00263924	0.0108063
11934	AL133163.2	0.14744	0.000130294	0.000130294	0.000736807
15360	CTNNBL1	0.147353	0.00317509	0.00317509	0.0126982
1271	IFI16	0.147266	0.0001728	0.0001728	0.000950235
4979	AC116366.3	0.147237	3.65e-05	3.65e-05	0.00022694
5772	SRF	0.147227	0.00133112	0.00133112	0.00591371
12010	SAMD4A	0.146867	0.00380466	0.00380466	0.0148638
465	SNIP1	0.146569	0.000441213	0.000441213	0.00221275
3077	EAF1	0.146493	0.00345918	0.00345918	0.0136878
6388	CREB5	0.146217	0.000295051	0.000295051	0.00154459
5664	PHF1	0.146213	0.000271879	0.000271879	0.00143398
14501	TOB1	0.146166	0.000213575	0.000213575	0.00115102
1210	ASH1L-AS1	0.146036	0.000178374	0.000178374	0.000975691
6800	ZNF277	0.145982	0.000786427	0.000786427	0.00371179
66	TNFRSF14-AS1	0.145815	5.44e-06	5.44e-06	3.85e-05
6522	ERV3-1	0.145795	2.46e-05	2.46e-05	0.000157218
6262	MAFK	0.145689	0.0010348	0.0010348	0.00473758
151	FBXO6	0.145579	0.000777007	0.000777007	0.00367282
973	SEC22B	0.145417	0.000129631	0.000129631	0.000733295
17063	SLC35E4	0.145412	0.000976902	0.000976902	0.00450896
16209	FFAR3	0.145383	1.15e-05	1.15e-05	7.73e-05
180	CASP9	0.145225	0.000468879	0.000468879	0.00233482
6362	TRA2A	0.145155	0.000838839	0.000838839	0.00393483
16875	TRIM28	0.145115	0.00195052	0.00195052	0.0083121
7082	ESYT2	0.144983	0.00196612	0.00196612	0.00837249
2082	FBXO11	0.144778	0.00219182	0.00219182	0.00921952
2374	MAP4K4	0.144732	7.18e-05	7.18e-05	0.000424459
3066	CCDC174	0.144634	0.000549501	0.000549501	0.00269424
17105	APOL1	0.144609	0.00124039	0.00124039	0.0055613
10938	AC079313.2	0.144395	0.00023135	0.00023135	0.00123921
15913	ZNF44	0.144352	0.000642486	0.000642486	0.00309823
7217	RP2	0.144331	0.00195457	0.00195457	0.00832731
12308	AL118558.3	0.144216	6.64e-05	6.64e-05	0.000395255
2187	NAGK	0.144173	0.00212694	0.00212694	0.00897673
15884	PLPPR2	0.144136	0.000517309	0.000517309	0.00255208
932	RSBN1	0.144092	0.000637802	0.000637802	0.00307818
11155	NUDT4	0.14401	0.00116317	0.00116317	0.00526484
11718	LINC00346	0.143912	0.00526049	0.00526049	0.019684
6860	STRIP2	0.143677	0.000746863	0.000746863	0.00354699
4329	UBE2D3	0.143593	0.000606641	0.000606641	0.00294317
1688	WDR26	0.143522	0.00181443	0.00181443	0.00778505
8330	DNAJB5-DT	0.143492	0.000333894	0.000333894	0.00172784
199	SZRD1	0.143432	0.002514	0.002514	0.0103782
11679	STK24	0.143411	0.00190402	0.00190402	0.00813366
3247	ATRIP	0.143378	0.000437211	0.000437211	0.00219581
7255	TFE3	0.143258	0.00041184	0.00041184	0.00208149
3110	AZI2	0.143035	0.00262893	0.00262893	0.0107716
11379	CLIP1	0.142816	0.00239468	0.00239468	0.00994884
14631	FAM20A	0.142495	0.00985196	0.00985196	0.0337691
821	DPYD	0.142328	0.00213845	0.00213845	0.00902095
10183	ZMIZ1	0.14231	0.00185029	0.00185029	0.00793116
13972	CHD3	0.142264	0.00114141	0.00114141	0.00517435
16878	MZF1-AS1	0.142229	0.000167336	0.000167336	0.000922504
10261	TBC1D12	0.142123	0.00354814	0.00354814	0.0139987
12349	CDCA4	0.141989	0.00428565	0.00428565	0.0164825
7779	FGFR1	0.14191	0.00107434	0.00107434	0.00489688
8909	PNPLA2	0.141733	0.000564952	0.000564952	0.00276383
14748	USP36	0.141536	7.1e-05	7.1e-05	0.000420423
8091	TRIB1	0.141514	0.000193967	0.000193967	0.00105278
16728	TSEN34	0.141425	0.00113548	0.00113548	0.0051488
7572	GDI1	0.141336	0.00106433	0.00106433	0.00486136
14417	AC008105.3	0.140771	0.000178309	0.000178309	0.00097564
17212	DESI1	0.140726	0.00492739	0.00492739	0.0185921
8819	SEC16A	0.140477	0.00148824	0.00148824	0.00651937
15134	SIRPD	0.140324	0.000620255	0.000620255	0.00300506
12497	SPTBN5	0.140044	4.38e-05	4.38e-05	0.000268135
1130	SPRR2A	0.140013	5.42e-19	5.42e-19	1.14e-17
13880	PLD2	0.139846	0.00283623	0.00283623	0.0115002
3938	MELTF	0.139736	0.00267208	0.00267208	0.0109179
8156	MAFA	0.139697	5.75e-05	5.75e-05	0.000346641
11355	P2RX4	0.139363	0.00344617	0.00344617	0.0136455
499	RLF	0.139212	0.000438923	0.000438923	0.00220252
8281	IFNB1	0.139211	1.49e-05	1.49e-05	9.82e-05
9468	TCIRG1	0.139175	0.00312344	0.00312344	0.0125259
8491	AL390760.1	0.139108	0.00153475	0.00153475	0.00670637
5218	ERGIC1	0.138823	0.0025495	0.0025495	0.0104927
16320	PAF1	0.138766	0.000980524	0.000980524	0.00452211
15571	DNAJC5	0.138697	0.00109741	0.00109741	0.00498908
9608	SLC36A4	0.13865	0.00410499	0.00410499	0.0158851
9640	BIRC2	0.138619	0.00205655	0.00205655	0.00871736
4532	IRF2	0.138422	0.000632888	0.000632888	0.00305698
3852	FAM131A	0.138366	0.00119312	0.00119312	0.00537823
5326	TUBB2A	0.138324	0.0066539	0.0066539	0.0241914
598	MOB3C	0.138172	0.00123499	0.00123499	0.00554275
3056	IQSEC1	0.138075	0.00100017	0.00100017	0.00460063
6754	POLR2J2	0.138045	0.000603388	0.000603388	0.00293143
13882	CHRNE	0.137855	0.00143942	0.00143942	0.00632917
14222	AP2B1	0.137764	0.00089876	0.00089876	0.00418904
9006	TMEM41B	0.137725	0.00251546	0.00251546	0.0103818
6915	AC083880.1	0.137704	0.000554761	0.000554761	0.002717
3832	MCCC1	0.13769	0.00316291	0.00316291	0.012661
17385	SCAF4	0.137377	0.00228342	0.00228342	0.00955216
1980	PPP1CB	0.137163	0.0014085	0.0014085	0.00621346
5553	IER3-AS1	0.136835	0.000135081	0.000135081	0.000760448
11056	TBK1	0.136659	0.0019112	0.0019112	0.00816237
2283	LINC01943	0.136538	2.46e-05	2.46e-05	0.000157281
9216	PATL1	0.136507	0.0011619	0.0011619	0.00526048
15645	MOB3A	0.136359	0.000865842	0.000865842	0.00404851
4252	AC124016.1	0.136356	0.00220756	0.00220756	0.00927572
12125	PCNX1	0.136261	0.00256631	0.00256631	0.0105532
1393	SELL	0.136193	1.13e-07	1.13e-07	1e-06
13156	AC007613.1	0.135957	0.00078743	0.00078743	0.00371553
5871	DDX43	0.135898	0.000222941	0.000222941	0.00119746
1272	AIM2	0.135886	0.00105224	0.00105224	0.00480991
13448	CYLD	0.135863	0.000461689	0.000461689	0.00230293
2376	IL1R2	0.135849	0.000613489	0.000613489	0.00297392
1590	RASSF5	0.135825	0.000297863	0.000297863	0.00155792
3536	AC073352.2	0.135754	0.00279252	0.00279252	0.0113334
7698	AC107959.4	0.135749	2.32e-05	2.32e-05	0.000149405
15174	PANK2	0.135587	0.00126579	0.00126579	0.00565641
296	SYF2	0.135327	0.00242879	0.00242879	0.0100667
3996	TNIP2	0.135258	0.0072271	0.0072271	0.0259528
16345	SERTAD3	0.135239	0.00396475	0.00396475	0.0154343
582	NASP	0.135228	0.00129437	0.00129437	0.00577093
7524	FMR1	0.1352	0.000547185	0.000547185	0.00268364
8463	S1PR3	0.135079	0.000527612	0.000527612	0.0025978
5716	FGD2	0.134954	0.00910773	0.00910773	0.0316445
1861	AC073195.1	0.13481	0.00107948	0.00107948	0.00491648
9311	MARK2	0.134713	0.00406865	0.00406865	0.0157688
15817	HNRNPM	0.134641	0.00444077	0.00444077	0.0169712
6607	DMTF1	0.13459	0.0036597	0.0036597	0.0143743
5473	BTN2A1	0.134424	0.00157027	0.00157027	0.00684113
7277	KDM5C	0.134296	0.00238539	0.00238539	0.00991259
1938	OTOF	0.134164	2.42e-05	2.42e-05	0.000155158
6062	VNN3	0.133963	3.62e-05	3.62e-05	0.000225702
2885	AGFG1	0.133884	0.00681391	0.00681391	0.0247066
9382	SIPA1	0.133824	0.000882504	0.000882504	0.00411984
5527	HLA-A	0.133805	0.00157258	0.00157258	0.0068478
14755	ENGASE	0.133713	0.00402781	0.00402781	0.0156347
8227	KANK1	0.133594	0.00795419	0.00795419	0.0282204
3598	TPRA1	0.133317	0.00253836	0.00253836	0.0104551
5710	RAB44	0.133274	5.92e-05	5.92e-05	0.000356135
14314	KRT13	0.133048	2.57e-14	2.57e-14	4.1e-13
6765	LINC01004	0.132634	0.00121575	0.00121575	0.00546917
3872	EIF4A2	0.132623	0.000542407	0.000542407	0.00266318
14053	FLCN	0.132497	0.00046981	0.00046981	0.00233879
11579	LCP1	0.132206	0.00152716	0.00152716	0.00667723
4308	EIF4E	0.132187	0.00657828	0.00657828	0.0239462
1757	AL355472.1	0.132138	0.0039883	0.0039883	0.0154985
15118	RBCK1	0.132136	0.000653067	0.000653067	0.00314235
8200	CYHR1	0.132122	0.000260014	0.000260014	0.00137761
9344	CDC42BPG	0.131854	0.000331304	0.000331304	0.00171707
9628	SESN3	0.13181	0.000530713	0.000530713	0.00261088
10624	CD69	0.131802	2.23e-06	2.23e-06	1.67e-05
8192	DGAT1	0.131742	0.00898189	0.00898189	0.031263
14300	RARA-AS1	0.131453	0.000201701	0.000201701	0.00109071
992	SRGAP2B	0.131273	0.00856264	0.00856264	0.03006
3435	EBLN2	0.131267	0.000332785	0.000332785	0.00172321
11315	TESC	0.131253	0.00106659	0.00106659	0.00486914
15857	TYK2	0.131138	0.00274843	0.00274843	0.0111829
7005	EZH2	0.130822	0.00175684	0.00175684	0.00756387
15773	SH2D3A	0.1308	1.82e-06	1.82e-06	1.38e-05
15445	PREX1	0.130792	0.000291072	0.000291072	0.00152559
5440	HIST1H4A	0.130789	0.000139163	0.000139163	0.000781283
11754	PIP4P1	0.130776	0.000761388	0.000761388	0.00360914
7990	STK3	0.130714	0.00648213	0.00648213	0.0236207
3000	BHLHE40	0.13054	0.00493162	0.00493162	0.0186033
14829	SLC16A3	0.13036	0.00289175	0.00289175	0.0116956
1472	RNF2	0.130251	0.0112288	0.0112288	0.037708
209	ATP13A2	0.13022	0.00237466	0.00237466	0.00987269
8286	CDKN2B	0.13021	0.00295852	0.00295852	0.0119299
5582	BAG6	0.130025	0.00489146	0.00489146	0.0184688
17178	AL031590.1	0.129928	0.00698497	0.00698497	0.0252278
170	PRDM2	0.129836	0.000826523	0.000826523	0.00388225
1232	SMG5	0.129792	0.00463124	0.00463124	0.0175957
6809	TFEC	0.129529	0.00490548	0.00490548	0.0185134
12785	SIN3A	0.129518	0.00376483	0.00376483	0.0147279
17048	MTMR3	0.129483	0.000989295	0.000989295	0.00455896
10542	LTBR	0.129323	0.00496836	0.00496836	0.0187145
13837	HIC1	0.129153	0.00158846	0.00158846	0.00691009
5320	LINC01011	0.128911	0.00024337	0.00024337	0.00129884
1038	FCGR1A	0.128652	0.00280775	0.00280775	0.01139
12902	BLM	0.128579	0.00302904	0.00302904	0.0121891
8752	GPR107	0.128426	0.00746203	0.00746203	0.0266709
3227	NBEAL2	0.128391	9.82e-05	9.82e-05	0.000566663
11952	PNN	0.128314	0.00226015	0.00226015	0.00946158
12554	SLC30A4	0.128152	0.000479574	0.000479574	0.00237863
2961	GPR35	0.128123	0.00627754	0.00627754	0.0229897
5168	NIPAL4	0.128099	0.00510812	0.00510812	0.0191915
15288	AL035071.1	0.128046	0.000285571	0.000285571	0.00149854
5711	CPNE5	0.127972	1.59e-05	1.59e-05	0.000104852
17033	Z93930.2	0.127911	0.00776048	0.00776048	0.0276252
15960	AC020916.2	0.127718	0.00116653	0.00116653	0.00527872
15699	ZBTB7A	0.12757	0.00859687	0.00859687	0.0301621
6932	MGAM	0.12741	2.01e-05	2.01e-05	0.000130668
6033	SMPDL3A	0.127363	0.0184526	0.0184526	0.0569829
17170	APOBEC3B	0.127278	0.000936246	0.000936246	0.00434071
2530	ZEB2-AS1	0.126894	0.0167247	0.0167247	0.0524512
10773	AC079630.1	0.12677	8.49e-05	8.49e-05	0.000496209
371	SRSF4	0.126734	0.00580134	0.00580134	0.0214516
11224	CKAP4	0.126728	0.00502566	0.00502566	0.0189101
13814	CRK	0.126723	0.00418639	0.00418639	0.0161538
5188	MIR3142HG	0.126689	0.00367197	0.00367197	0.0144128
1551	LINC01136	0.126531	0.000227961	0.000227961	0.00122292
6708	TSC22D4	0.126525	0.000459767	0.000459767	0.00229465
6211	AGPAT4	0.126179	0.0168842	0.0168842	0.052885
10246	BTAF1	0.126162	0.00549874	0.00549874	0.0204794
904	LRIF1	0.125897	0.00489119	0.00489119	0.0184688
6528	TPST1	0.125531	0.0184537	0.0184537	0.0569829
16879	MZF1	0.125521	0.00252038	0.00252038	0.0103948
1226	SEMA4A	0.125455	0.0105277	0.0105277	0.0357433
12137	AC004846.2	0.125347	0.00398276	0.00398276	0.0154838
6804	BMT2	0.125299	0.00699922	0.00699922	0.0252689
15052	PHLPP1	0.125294	0.000175831	0.000175831	0.000964791
15784	MCOLN1	0.125266	0.00197296	0.00197296	0.00839852
5317	SERPINB9P1	0.125244	0.00331	0.00331	0.0131777
2146	ACTR2	0.125146	0.00572698	0.00572698	0.0212169
3040	GHRLOS	0.125139	7.81e-05	7.81e-05	0.00045956
7487	STK26	0.125101	0.0053719	0.0053719	0.0200538
13859	P2RX1	0.124941	0.00139631	0.00139631	0.00616898
12922	ARRDC4	0.124692	0.00848752	0.00848752	0.0298381
17053	TBC1D10A	0.124689	0.00186734	0.00186734	0.00799449
15056	VPS4B	0.124533	0.00305311	0.00305311	0.0122691
8338	RUSC2	0.124284	0.0191973	0.0191973	0.0587795
16643	SIGLEC9	0.124265	0.0232498	0.0232498	0.0686697
1077	ARNT	0.124221	0.00673344	0.00673344	0.02444
5456	AL031777.3	0.124197	0.000542894	0.000542894	0.00266483
2983	NEU4	0.12412	0.00346616	0.00346616	0.0137092
1217	KHDC4	0.123985	0.00540716	0.00540716	0.020164
13644	AP1G1	0.123823	0.0049053	0.0049053	0.0185134
890	STRIP1	0.123816	0.00317398	0.00317398	0.0126966
3013	SETD5	0.123729	0.00444035	0.00444035	0.0169712
7467	XIAP	0.123659	0.00565756	0.00565756	0.0209907
6589	GSAP	0.123601	0.00933735	0.00933735	0.0322825
7721	PTK2B	0.123595	0.000590925	0.000590925	0.00287806
11597	FNDC3A	0.123423	0.00410791	0.00410791	0.0158908
2771	INO80D	0.123408	0.00341231	0.00341231	0.0135237
2851	TUBA4A	0.123369	0.00204382	0.00204382	0.00866969
3429	PROK2	0.123344	3.4e-08	3.4e-08	3.19e-07
5379	EDN1	0.123301	0.000727361	0.000727361	0.00346093
13750	ZC3H18	0.122927	0.00357689	0.00357689	0.01409
4580	SRD5A1	0.122926	0.01521	0.01521	0.0484539
8336	FAM214B	0.122814	0.0158539	0.0158539	0.0501863
1328	MPZ	0.122623	0.000110651	0.000110651	0.000633893
15237	RALGAPA2	0.12251	0.000405513	0.000405513	0.00205543
8159	GSDMD	0.122438	0.00465705	0.00465705	0.0176823
13155	TXNDC11	0.12243	0.00861452	0.00861452	0.0302075
13100	CREBBP	0.12241	0.00185841	0.00185841	0.0079621
2891	TRIP12	0.122246	0.00624544	0.00624544	0.0228865
8557	AL359182.2	0.122056	0.000272192	0.000272192	0.0014352
13819	PITPNA	0.122036	0.00604774	0.00604774	0.0222363
2002	NLRC4	0.122027	0.0088565	0.0088565	0.0308816
472	C1orf122	0.121985	0.0164925	0.0164925	0.051834
14777	AATK	0.1217	0.000230402	0.000230402	0.00123488
14261	AC006449.2	0.121638	0.00186858	0.00186858	0.00799784
10576	C12orf57	0.121538	0.0162941	0.0162941	0.0512932
749	SPATA1	0.121289	0.00369391	0.00369391	0.0144827
17407	SON	0.121147	0.00564898	0.00564898	0.0209633
17062	TCN2	0.121143	0.0230324	0.0230324	0.0681078
3120	CMTM6	0.120898	0.00383351	0.00383351	0.0149665
4429	IL15	0.120747	0.0208396	0.0208396	0.0628735
9783	SORL1	0.120512	2.16e-06	2.16e-06	1.62e-05
11109	PHLDA1	0.120423	0.0148871	0.0148871	0.0475906
5715	MTCH1	0.120392	0.0126196	0.0126196	0.041575
15992	BRD4	0.120371	0.00387017	0.00387017	0.0150862
12514	UBR1	0.120344	0.00126037	0.00126037	0.00563796
2415	BCL2L11	0.120227	0.00628605	0.00628605	0.0230161
16662	SIGLEC5	0.120167	0.000104234	0.000104234	0.00059948
14886	EPB41L3	0.119997	0.0218157	0.0218157	0.0652464
12589	LYSMD2	0.119975	0.00512713	0.00512713	0.0192588
16352	COQ8B	0.119869	0.00445045	0.00445045	0.0170045
133	KIF1B	0.119832	0.0139805	0.0139805	0.0451851
9245	CYB561A3	0.11983	0.0123234	0.0123234	0.0407752
13862	CYB5D2	0.119753	0.00359446	0.00359446	0.0141434
15552	ARFGAP1	0.119696	0.00974974	0.00974974	0.0334644
14729	MFSD11	0.119583	0.00405349	0.00405349	0.015724
13513	USB1	0.119511	0.00847184	0.00847184	0.0298045
16398	ERF	0.11948	0.00447629	0.00447629	0.0170735
16564	TULP2	0.119471	5.02e-05	5.02e-05	0.000304634
10070	ARID5B	0.119325	0.00876523	0.00876523	0.0306364
6711	SAP25	0.119193	0.00311099	0.00311099	0.0124845
1171	UBAP2L	0.119127	0.00506147	0.00506147	0.0190407
5978	MICAL1	0.11881	0.0131205	0.0131205	0.0428714
9968	MASTL	0.11876	0.00829442	0.00829442	0.0292647
3035	VHL	0.118729	0.00436554	0.00436554	0.0167347
13872	ARRB2	0.118698	0.00464339	0.00464339	0.0176342
8951	CARS	0.118531	0.00296782	0.00296782	0.0119564
14422	ARHGAP27	0.118377	0.00395414	0.00395414	0.0154032
11057	RASSF3	0.118324	0.00356316	0.00356316	0.0140485
16759	AC011476.3	0.11831	0.00044461	0.00044461	0.00222787
1132	SPRR2E	0.118215	6.55e-12	6.55e-12	8.62e-11
4090	ARAP2	0.117969	0.00320214	0.00320214	0.0128005
7179	TAB3	0.117915	0.00349907	0.00349907	0.0138145
11383	RSRC2	0.117819	0.00664703	0.00664703	0.0241714
15095	MBP	0.11757	0.000496841	0.000496841	0.00245941
16547	CYTH2	0.117539	0.00865704	0.00865704	0.0303171
6418	HERPUD2	0.117501	0.00421279	0.00421279	0.0162339
8404	AL358113.1	0.117397	0.00247059	0.00247059	0.0102207
11720	AL442128.2	0.117308	0.00531224	0.00531224	0.0198395
16388	ARHGEF1	0.117123	0.00106734	0.00106734	0.00487131
5919	AKIRIN2	0.117081	0.00451163	0.00451163	0.0171934
4977	SLC22A4	0.11705	0.00160602	0.00160602	0.00697955
1764	AL391832.2	0.117047	0.000143132	0.000143132	0.000800384
5549	MDC1	0.117018	0.00682089	0.00682089	0.0247185
4433	USP38	0.116893	0.0138571	0.0138571	0.0448604
9012	AC026250.1	0.116831	0.000849003	0.000849003	0.00397932
7413	MORF4L2	0.116811	0.00489156	0.00489156	0.0184688
6406	AC005154.4	0.116785	0.00594462	0.00594462	0.0219184
16463	ZNF296	0.116676	0.000527562	0.000527562	0.0025978
16573	SNRNP70	0.116526	0.00803171	0.00803171	0.0284579
1503	MIR181A1HG	0.11643	0.025115	0.025115	0.0732663
8646	RC3H2	0.116354	0.0113471	0.0113471	0.0380395
14652	GPRC5C	0.116297	0.000366428	0.000366428	0.00187793
9682	SIK2	0.116093	0.0113709	0.0113709	0.038105
1555	ZC3H11A	0.116085	0.00143253	0.00143253	0.00630362
1035	AC245297.3	0.115893	0.00527853	0.00527853	0.0197346
51	NADK	0.115892	0.00236978	0.00236978	0.00985471
3915	TNK2	0.115793	0.00426196	0.00426196	0.0164022
7749	GTF2E2	0.115773	0.014825	0.014825	0.0474426
216	ARHGEF10L	0.11576	0.0340813	0.0340813	0.093561
7624	PPP1R3B	0.11575	0.00179617	0.00179617	0.00771805
207	BX284668.6	0.115703	7.43e-05	7.43e-05	0.000438553
13445	SNX20	0.11548	0.00180679	0.00180679	0.00775799
5994	REV3L	0.115459	0.00644591	0.00644591	0.0235033
10600	LINC00937	0.115415	0.0131824	0.0131824	0.0430335
9597	PICALM	0.115371	0.007338	0.007338	0.0262822
5970	FOXO3	0.115338	0.017158	0.017158	0.0535899
10727	STK38L	0.11525	0.0127457	0.0127457	0.0419353
10657	ETV6	0.114986	0.0178376	0.0178376	0.0553481
16478	PPM1N	0.114964	0.0086526	0.0086526	0.0303091
8313	UBAP2	0.114824	0.00524481	0.00524481	0.0196388
3430	LINC00877	0.114685	0.00507595	0.00507595	0.0190884
6563	NCF1	0.114587	0.0097411	0.0097411	0.0334532
10159	PLAU	0.114551	4.61e-06	4.61e-06	3.29e-05
6486	SNHG15	0.114467	0.0238637	0.0238637	0.0702229
2455	CCDC93	0.114322	0.00469387	0.00469387	0.0178105
343	FGR	0.114153	0.00678414	0.00678414	0.0246088
16819	AC005261.1	0.114136	0.00423953	0.00423953	0.016323
11568	GPALPP1	0.114124	0.0139385	0.0139385	0.0450832
11276	SH2B3	0.114037	0.0328888	0.0328888	0.090913
12264	BTBD7	0.113899	0.0193768	0.0193768	0.0591926
294	RUNX3	0.113897	0.00254284	0.00254284	0.0104702
10663	DUSP16	0.113896	0.000314127	0.000314127	0.00163568
11885	TGM1	0.113867	1e-05	1e-05	6.82e-05
6309	ZNF316	0.113741	0.00168201	0.00168201	0.00727022
5260	FAM193B	0.113687	0.00118524	0.00118524	0.00535232
10459	AL731571.1	0.113528	0.000395555	0.000395555	0.0020096
3835	B3GNT5	0.113461	0.00920706	0.00920706	0.0319201
14741	AC087645.2	0.11323	0.00970772	0.00970772	0.0333594
15562	RTEL1-TNFRSF6B	0.113144	0.00434632	0.00434632	0.0166756
10012	AC010864.1	0.11307	0.00123116	0.00123116	0.00552983
7961	GEM	0.113069	0.030476	0.030476	0.0854819
4117	RBM47	0.112913	0.0128	0.0128	0.0420826
14074	TOP3A	0.112842	0.00952974	0.00952974	0.0328442
668	JUN	0.112786	0.0137372	0.0137372	0.0445382
5601	HSPA1L	0.112781	0.000406361	0.000406361	0.00205795
864	TAF13	0.112651	0.0152458	0.0152458	0.0485414
98	PHF13	0.112564	0.00327187	0.00327187	0.0130466
14686	RECQL5	0.112533	0.00179818	0.00179818	0.0077229
12338	TDRD9	0.112456	0.000826162	0.000826162	0.00388159
3044	ATG7	0.112331	0.0112883	0.0112883	0.0378643
4708	AC016596.1	0.112329	0.00347445	0.00347445	0.0137358
6574	POR	0.112244	0.0133972	0.0133972	0.0436292
14635	MAP2K6	0.112179	3.59e-05	3.59e-05	0.000224041
10404	CASP7	0.112158	0.0195528	0.0195528	0.0595852
4893	LINC02062	0.112131	0.00523925	0.00523925	0.0196254
14828	AC132872.2	0.112124	0.000146201	0.000146201	0.000815722
13812	ABR	0.112026	0.0203839	0.0203839	0.0617639
16507	PRKD2	0.112017	0.00156896	0.00156896	0.00684054
569	PTCH2	0.11198	0.0288199	0.0288199	0.0818834
1158	DENND4B	0.111892	0.0102011	0.0102011	0.0347892
13976	CNTROB	0.111835	0.00811686	0.00811686	0.0287133
17002	UPB1	0.111709	0.0012028	0.0012028	0.0054163
7309	MSN	0.111696	0.0159548	0.0159548	0.0504604
8249	RIC1	0.111516	0.0104794	0.0104794	0.0356137
15316	ACSS2	0.111255	0.0139732	0.0139732	0.0451696
16593	SCAF1	0.111229	0.0187647	0.0187647	0.0577855
14303	IGFBP4	0.111192	0.00410827	0.00410827	0.0158908
11738	GAS6	0.111146	0.0336974	0.0336974	0.09271
10280	FRAT2	0.110893	0.00583167	0.00583167	0.0215547
9217	STX3	0.110892	0.00158557	0.00158557	0.00690095
7855	CHD7	0.110886	0.00224925	0.00224925	0.0094227
12889	ZNF710	0.110859	0.0114865	0.0114865	0.038419
11530	CCNA1	0.110757	0.00366953	0.00366953	0.0144065
6233	AL354892.2	0.110739	0.00278008	0.00278008	0.0112891
21	TNFRSF4	0.11065	0.00455778	0.00455778	0.0173391
5000	PPP2CA	0.11059	0.0113809	0.0113809	0.0381238
6355	FAM126A	0.11034	0.0281993	0.0281993	0.0805503
8320	FAM219A	0.110249	0.00954775	0.00954775	0.0328998
8224	C9orf66	0.110231	0.00135728	0.00135728	0.00601775
9205	LPXN	0.110165	0.0358543	0.0358543	0.0973322
348	THEMIS2	0.110155	0.0177116	0.0177116	0.0550482
1556	ZBED6	0.110146	0.00221339	0.00221339	0.00929464
1438	AL353708.3	0.110059	0.00425636	0.00425636	0.0163842
17001	ADORA2A-AS1	0.109993	0.000642834	0.000642834	0.00309906
11302	SLC8B1	0.10997	0.0344771	0.0344771	0.0943967
7223	USP11	0.109787	0.018255	0.018255	0.0564434
15402	PI3	0.109758	0.000218645	0.000218645	0.00117618
5660	TAPBP	0.109713	0.0114474	0.0114474	0.0383101
16508	STRN4	0.109606	0.0209574	0.0209574	0.0631528
10279	FRAT1	0.109577	0.0172028	0.0172028	0.0537106
6893	TMEM140	0.109562	0.000774501	0.000774501	0.00366338
14116	TNFAIP1	0.109375	0.0179508	0.0179508	0.0556401
16756	AC245128.3	0.109098	0.0067113	0.0067113	0.0243647
15133	SIRPB2	0.108957	0.0107864	0.0107864	0.0364452
11335	PXN	0.108864	0.00243684	0.00243684	0.0100953
13716	ADAD2	0.108815	0.00038978	0.00038978	0.00198198
4718	GAPT	0.108518	0.00103641	0.00103641	0.00474248
14833	AC132872.1	0.108451	0.00253633	0.00253633	0.0104508
9061	HPS5	0.108407	0.00430736	0.00430736	0.0165587
3695	C3orf58	0.108308	0.0378378	0.0378378	0.101384
6778	CCDC71L	0.108243	0.00561898	0.00561898	0.0208829
13393	ZNF668	0.108142	0.0188709	0.0188709	0.0580006
11055	AC135279.3	0.108104	0.00513375	0.00513375	0.0192754
854	FAM102B	0.107898	0.0392126	0.0392126	0.104114
3138	LRRFIP2	0.107898	0.0269542	0.0269542	0.0776382
14075	SMCR8	0.107887	0.0148587	0.0148587	0.0475159
1474	SWT1	0.107754	0.0148542	0.0148542	0.0475102
17168	CBX6	0.107735	0.0187836	0.0187836	0.057823
14636	KCNJ2-AS1	0.107513	0.000676863	0.000676863	0.00324528
1212	YY1AP1	0.107479	0.0123019	0.0123019	0.0407349
1638	FAM71A	0.107438	0.00336822	0.00336822	0.0133943
6930	WEE2-AS1	0.107376	0.000390456	0.000390456	0.00198485
9898	UPF2	0.107191	0.0125794	0.0125794	0.0414971
113	RERE	0.107172	0.0144866	0.0144866	0.0465379
3961	PCGF3	0.10714	0.0266373	0.0266373	0.076902
6138	TAB2	0.107108	0.0102626	0.0102626	0.0349717
4236	CCNG2	0.106998	0.00326633	0.00326633	0.0130275
4595	ANKRD33B	0.106968	0.00372093	0.00372093	0.0145757
15775	ADGRE1	0.106916	0.00697105	0.00697105	0.0251934
3096	UBE2E1	0.106904	0.027329	0.027329	0.0784987
2164	LINC01888	0.106676	0.00951847	0.00951847	0.0328118
2238	HK2	0.106572	0.0434683	0.0434683	0.112903
4538	AC084871.2	0.106563	0.000153492	0.000153492	0.000852072
10874	CSRNP2	0.106444	0.01553	0.01553	0.0492856
5613	STK19	0.106386	0.0162242	0.0162242	0.0511372
16823	TRAPPC2B	0.106325	0.0207433	0.0207433	0.0626476
15609	ABCA7	0.106303	0.00274826	0.00274826	0.0111829
13836	AC090617.5	0.106265	0.000411836	0.000411836	0.00208149
16065	MPV17L2	0.106247	0.0199814	0.0199814	0.0607109
6214	CAHM	0.106181	0.00881176	0.00881176	0.0307562
6248	AC147651.4	0.10616	0.0321034	0.0321034	0.0892904
4411	ELF2	0.10616	0.00413889	0.00413889	0.0159894
4321	PPP3CA	0.106152	0.0124997	0.0124997	0.0412807
12749	ADPGK	0.106036	0.0246241	0.0246241	0.0720618
9174	SLC39A13	0.106009	0.0229443	0.0229443	0.0679389
5416	E2F3	0.105994	0.00479082	0.00479082	0.0181313
15430	CD40	0.105923	0.0447988	0.0447988	0.115776
7689	CCAR2	0.105799	0.0129737	0.0129737	0.0425268
3361	PRKCD	0.105683	0.0125957	0.0125957	0.0415275
1819	AL390728.5	0.105616	0.0137532	0.0137532	0.0445817
1799	ADSS	0.105591	0.0364617	0.0364617	0.0985392
7244	WAS	0.105526	0.0107029	0.0107029	0.0362258
12913	FAM174B	0.105416	0.000538029	0.000538029	0.00264316
15698	PIAS4	0.105362	0.0183778	0.0183778	0.0567931
14142	FLOT2	0.105248	0.00770052	0.00770052	0.027434
15505	STX16	0.105155	0.0114979	0.0114979	0.0384497
8108	PHF20L1	0.105118	0.00758993	0.00758993	0.0270675
17159	JOSD1	0.105097	0.00611023	0.00611023	0.0224425
2615	DLX2	0.10502	0.000449807	0.000449807	0.00224814
14024	AC022816.1	0.10499	0.000123706	0.000123706	0.000702722
9206	ZFP91	0.10498	0.0389669	0.0389669	0.103572
8651	DENND1A	0.104975	0.0293959	0.0293959	0.0831565
17419	RCAN1	0.104926	0.0426795	0.0426795	0.111268
9121	FJX1	0.104886	0.00526743	0.00526743	0.0197015
4079	PI4K2B	0.104883	0.011117	0.011117	0.0374112
5687	ZNF76	0.104788	0.0171513	0.0171513	0.0535785
1506	ZNF281	0.104788	0.00849987	0.00849987	0.0298755
6626	AC002456.1	0.104786	0.0355644	0.0355644	0.0967155
12427	SLC12A6	0.104754	0.00419249	0.00419249	0.0161738
8462	C9orf47	0.104651	0.000896901	0.000896901	0.0041826
3091	RAB5A	0.104385	0.0101632	0.0101632	0.0346735
16090	HOMER3	0.104376	0.0508365	0.0508365	0.127732
12003	FERMT2	0.104295	0.00667529	0.00667529	0.024249
12033	PSMA3-AS1	0.104247	0.0107407	0.0107407	0.036319
15598	PTBP1	0.104045	0.0318821	0.0318821	0.0888015
8020	BAALC	0.104037	0.0277601	0.0277601	0.0795547
484	AKIRIN1	0.104008	0.0217808	0.0217808	0.0651753
201	NECAP2	0.103984	0.033039	0.033039	0.0912563
14849	B3GNTL1	0.103857	0.00914529	0.00914529	0.0317687
7215	CHST7	0.103828	0.0261519	0.0261519	0.0757875
4242	AC098818.2	0.103793	0.0172485	0.0172485	0.053834
214	PADI4	0.103784	0.000913716	0.000913716	0.00425085
14177	NF1	0.103708	0.0185436	0.0185436	0.0571848
2388	AC012360.3	0.103693	0.00200054	0.00200054	0.00850666
6810	TES	0.10365	0.0191441	0.0191441	0.0586757
6743	ORAI2	0.103558	0.0135997	0.0135997	0.0441574
8103	ASAP1	0.103455	0.0339851	0.0339851	0.0933698
5211	FBXW11	0.103446	0.0298229	0.0298229	0.084078
3158	AC092053.3	0.103388	0.000775298	0.000775298	0.00366617
4659	RPL37	0.103294	0.0160559	0.0160559	0.0507251
1674	AIDA	0.103205	0.0322656	0.0322656	0.0895425
7391	GLA	0.103197	0.0186198	0.0186198	0.0574096
6386	JAZF1	0.103146	0.0328698	0.0328698	0.0908746
13654	AC004943.2	0.103139	0.0214707	0.0214707	0.064423
14961	RNF138	0.103116	0.0105903	0.0105903	0.0359142
2378	IL1RL2	0.103076	0.000778152	0.000778152	0.00367669
16607	PNKP	0.103016	0.0245084	0.0245084	0.0717949
6703	ZCWPW1	0.102989	0.00860181	0.00860181	0.0301734
14297	WIPF2	0.102967	0.012988	0.012988	0.042557
2494	AC012306.2	0.102956	0.00926254	0.00926254	0.0320492
11709	IRS2	0.102901	0.00765561	0.00765561	0.0272961
14905	CHMP1B	0.102857	0.0331011	0.0331011	0.0914134
14392	TMUB2	0.10278	0.0140063	0.0140063	0.0452268
15959	ZSWIM4	0.102645	0.0241432	0.0241432	0.0708908
5568	HLA-C	0.102604	0.014764	0.014764	0.0472906
8118	AC083843.3	0.102579	0.00290744	0.00290744	0.0117509
9551	DGAT2	0.102562	0.000538335	0.000538335	0.00264393
3917	TFRC	0.102449	0.0534038	0.0534038	0.132757
14852	AC144831.1	0.102435	0.0106514	0.0106514	0.0360727
11344	RNF10	0.102432	0.017552	0.017552	0.0546261
16403	CNFN	0.102386	1.07e-08	1.07e-08	1.05e-07
9674	ZC3H12C	0.102239	0.0532163	0.0532163	0.132469
10292	ZFYVE27	0.102173	0.0100252	0.0100252	0.0342826
7800	AC103724.3	0.102091	0.000136434	0.000136434	0.000767079
840	SLC30A7	0.102014	0.0263984	0.0263984	0.0763379
952	ATP1A1	0.102011	0.0427198	0.0427198	0.111305
5064	ANKHD1	0.101894	0.0163385	0.0163385	0.0514145
12050	TRMT5	0.101749	0.0398851	0.0398851	0.105406
6560	CLIP2	0.101677	0.0450834	0.0450834	0.11631
13404	AC009088.1	0.101652	0.000528616	0.000528616	0.00260202
17284	CERK	0.101578	0.0122978	0.0122978	0.0407349
2514	RAB3GAP1	0.101465	0.0203065	0.0203065	0.0615401
5800	SLC35B2	0.10146	0.0208811	0.0208811	0.0629769
6092	AL357060.1	0.101372	0.00996713	0.00996713	0.0341172
8934	LSP1	0.101165	0.0106505	0.0106505	0.0360727
10289	PI4K2A	0.101136	0.0564554	0.0564554	0.138577
[truncated: 15,793 more rows]

## Sheet: NeutroVAP_EarlyTime_vs_LateTime
	gene	log2FC	pval	Pval_clean	qval
[truncated: 17,553 more rows]

[truncated: 1 more sheets: TcellVAP_EarlyTime_vs_LateTime]
