# Supplementary material for: Impaired immune signaling and changes in the lung microbiome precede secondary bacterial pneumonia in COVID-19
Source: Res Sq. 2021 Apr 23:rs.3.rs-380803. Preprint. [Version 1] doi: 10.21203/rs.3.rs-380803/v1 (PMC8132240; doi:10.21203/rs.3.rs-380803/v1)
Supplement: Supplement 7 [file fb3e7666cf1e26f6764aa51c.xlsx]

## Sheet: MonoMac_VAP_vs_NOVAP_EarlyTime
Ingenuity Canonical Pathways	-log(p-value)	zScore	Molecules
IL-6 Signaling	7.21	-3.87298	CSNK2B,CXCL8,FOS,IL1RN,IL6R,JUN,MAP2K3,MCL1,NFKB1,NFKB2,NFKBIA,NFKBID,PIK3R5,TNFRSF1B,VEGFA
Cardiac Hypertrophy Signaling (Enhanced)	2.26	-3.29983	ADCY3,adenosine triphosphate,ADRB2,AKAP13,CALM1 (includes others),CTNNB1,CXCL8,EIF4E,GNAI2,IL6R,ITGA5,JUN,MAP2K3,NFKB1,NFKB2,OSM,PDIA3,PIK3R5,TNFRSF1B,TNFSF14
TREM1 Signaling	5.4	-3.16228	CCL3,CD83,CXCL8,IRAK1,ITGA5,ITGAX,NFKB1,NFKB2,TLR2,TREM1
Systemic Lupus Erythematosus In B Cell Signaling Pathway	3.54	-3	CALM1 (includes others),CTNNB1,CXCL8,FGR,FOS,IL6R,IRAK1,JUN,MCL1,NFKB1,NFKB2,OSM,PIK3R5,RAC1,TNFSF14,TRAF1
Acute Phase Response Signaling	4.52	-2.88675	FOS,IL1RN,IL6R,IRAK1,JUN,MAP2K3,NFKB1,NFKB2,NFKBIA,NFKBID,OSM,RBP4,SERPING1,TNFRSF1B
iNOS Signaling	8.48	-2.82843	CALM1 (includes others),FOS,HMGA1,IRAK1,IRAK2,IRF1,JUN,NFKB1,NFKB2,NFKBIA,NFKBID
Aryl Hydrocarbon Receptor Signaling	4.81	-2.82843	AHR,ALDH2,FOS,GSTO1,GSTP1,HSP90AB1,HSP90B1,JUN,MGST1,MGST3,NCOR2,NFKB1,NFKB2
IL-15 Production	1.87	-2.64575	ABL2,CLK1,FGR,IRF1,MAP2K3,NFKB1,NFKB2
Type II Diabetes Mellitus Signaling	1.67	-2.64575	adenosine triphosphate,CD36,NFKB1,NFKB2,NFKBIA,NFKBID,PIK3R5,TNFRSF1B
IL-1 Signaling	6.17	-2.52982	ADCY3,adenosine triphosphate,FOS,GNAI2,IRAK1,IRAK2,JUN,MAP2K3,NFKB1,NFKB2,NFKBIA,NFKBID
HMGB1 Signaling	3.14	-2.52982	CXCL8,FOS,JUN,MAP2K3,NFKB1,NFKB2,OSM,PIK3R5,RAC1,TNFRSF1B,TNFSF14
Neuroinflammation Signaling Pathway	4.93	-2.52357	adenosine triphosphate,ATF4,B2M,CCL3,CTNNB1,CXCL8,FOS,HLA-DRB5,HLA-E,IL6R,IRAK1,IRAK2,JUN,MAPK6,MMP9,NFKB1,NFKB2,PIK3R5,TLR2,TREM2
LPS/IL-1 Mediated Inhibition of RXR Function	3.97	-2.44949	ALDH2,APOC1,APOC2,APOE,FABP3,FABP4,GSTO1,GSTP1,IL1RN,IRAK1,JUN,MGST1,MGST3,PLTP,TNFRSF1B
FAT10 Cancer Signaling Pathway	3.43	-2.44949	CTNNB1,CXCR4,NFKB1,NFKB2,NFKBIA,TNFRSF1B
Huntington's Disease Signaling	3.17	-2.44949	ATF4,ATP5F1D,ATP5MC1,CLTB,HSPA1A/HSPA1B,HSPA6,JUN,NCOR2,PIK3R5,POLR2L,PSME1,PSME2,SGK1,UBC
Estrogen-Dependent Breast Cancer Signaling	2.88	-2.44949	ATF4,FOS,HSD17B14,JUN,NFKB1,NFKB2,PIK3R5
Pyridoxal 5'-phosphate Salvage Pathway	2.29	-2.44949	adenosine triphosphate,DAPK1,IRAK1,MAP2K3,MAPK6,SGK1
NF-κB Activation by Viruses	2.26	-2.44949	NFKB1,NFKB2,NFKBIA,NFKBID,PIK3R5,TNFRSF14
Thyroid Cancer Signaling	2.16	-2.44949	CTNNB1,CXCL8,CXCR4,FOS,JUN,PIK3R5
TNFR2 Signaling	9.53	-2.33333	FOS,JUN,NFKB1,NFKB2,NFKBIA,NFKBID,TANK,TNFAIP3,TNFRSF1B,TRAF1
Type I Diabetes Mellitus Signaling	4.64	-2.33333	FCER1G,HLA-DRB5,HLA-E,IRAK1,IRF1,MAP2K3,NFKB1,NFKB2,NFKBIA,NFKBID,TNFRSF1B
Th17 Activation Pathway	3.85	-2.33333	AHR,FCER1G,HSP90AB1,HSP90B1,IL6R,IRAK1,IRAK2,NFKB1,NFKB2
p38 MAPK Signaling	3.08	-2.33333	ATF4,DDIT3,DUSP1,H3-3A/H3-3B,IL1RN,IRAK1,IRAK2,MAP2K3,TNFRSF1B
B Cell Receptor Signaling	3.15	-2.3094	ATF4,CALM1 (includes others),EGR1,JUN,MAP2K3,NFKB1,NFKB2,NFKBIA,NFKBID,PIK3R5,POU2F2,RAC1
Hypoxia Signaling in the Cardiovascular System	5.51	-2.23607	ATF4,HSP90AB1,HSP90B1,JUN,NFKBIA,NFKBID,P4HB,UBE2L3,UBE2V1,VEGFA
JAK/Stat Signaling	1.59	-2.23607	FOS,JUN,NFKB1,NFKB2,PIK3R5
Neurotrophin/TRK Signaling	1.57	-2.23607	ATF4,FOS,JUN,MAP2K3,PIK3R5
Role of Hypercytokinemia/hyperchemokinemia in the Pathogenesis of Influenza	1.45	-2.23607	CCL3,CXCL8,IL1RN,NFKB1,NFKB2
Dendritic Cell Maturation	5.73	-2.13809	ATF4,B2M,CD83,FCER1G,HLA-DRB5,HLA-E,IL1RN,NFKB1,NFKB2,NFKBIA,NFKBID,PDIA3,PIK3R5,TLR2,TNFRSF1B,TREM2
HER-2 Signaling in Breast Cancer	4.19	-2.13809	COX4I1,COX5A,COX7A2,COX8A,CYB5A,FCER1G,FGR,FOS,JUN,NFKB1,NFKB2,NFKBIA,NFKBID,PIK3R5
Senescence Pathway	2.62	-2.13809	CALM1 (includes others),CXCL8,EIF4E,GADD45B,HBP1,JUN,MAP2K3,MAPK6,NFKB1,NFKB2,PIK3R5,SQSTM1,TLR2,ZFP36L1
Toll-like Receptor Signaling	8.18	-2.12132	FOS,IL1RN,IRAK1,IRAK2,JUN,MAP2K3,NFKB1,NFKB2,NFKBIA,TLR2,TNFAIP3,TRAF1,UBC
Salvage Pathways of Pyrimidine Ribonucleotides	2.54	-2.12132	adenosine triphosphate,APOBEC3A,DAPK1,IRAK1,MAP2K3,MAPK6,NME2,SGK1
PKCθ Signaling in T Lymphocytes	3.28	-2.11058	FCER1G,FOS,HLA-DRB5,JUN,LCP2,NFKB1,NFKB2,NFKBIA,NFKBID,PIK3R5,RAC1
B Cell Activating Factor Signaling	4.7	-2	FOS,JUN,NFKB1,NFKB2,NFKBIA,NFKBID,TRAF1
4-1BB Signaling in T Lymphocytes	4.34	-2	JUN,NFKB1,NFKB2,NFKBIA,NFKBID,TRAF1
CD27 Signaling in Lymphocytes	3.96	-2	FOS,JUN,MAP2K3,NFKB1,NFKB2,NFKBIA,NFKBID
Inhibition of Angiogenesis by TSP1	2.91	-2	CD36,JUN,MMP9,SDC2,VEGFA
UVB-Induced MAPK Signaling	2.35	-2	EIF4E,FOS,H3-3A/H3-3B,JUN,PIK3R5
Small Cell Lung Cancer Signaling	2.35	-2	NFKB1,NFKB2,NFKBIA,NFKBID,PIK3R5,TRAF1
Role of IL-17F in Allergic Inflammatory Airway Diseases	1.92	-2	ATF4,CXCL8,NFKB1,NFKB2
Remodeling of Epithelial Adherens Junctions	3.27	2	ACTB,ARPC1B,ARPC3,CTNNB1,RAB5C,TUBA1C,TUBB
Glycolysis I	2.76	2	adenosine triphosphate,ALDOA,FBP1,GAPDH,TPI1
Glutathione-mediated Detoxification	1.88	2	GSTO1,GSTP1,MGST1,MGST3
Coronavirus Replication Pathway	1.82	2	CTSL,IFITM2,TUBA1C,TUBB
LXR/RXR Activation	7.12	2.11058	APOC1,APOC2,APOE,CD36,ECHS1,IL1RN,MMP9,MSR1,MYLIP,NCOR2,NFKB1,NFKB2,PLTP,RBP4,TNFRSF1B
Xenobiotic Metabolism CAR Signaling Pathway	1.74	2.33333	ALDH2,CITED2,GSTO1,GSTP1,HSP90AB1,HSP90B1,MAP2K3,MGST1,MGST3
Oxidative Phosphorylation	11.2	4.3589	adenosine triphosphate,ATP5F1D,ATP5MC1,ATP5MC2,ATP5MC3,ATP5MF,ATP5PO,COX4I1,COX5A,COX7A2,COX8A,CYB5A,CYC1,NDUFA6,NDUFAB1,NDUFB8,NDUFB9,NDUFS5,UQCRQ

## Sheet: Neutro_VAP_vs_NOVAP_EarlyTime
Ingenuity Canonical Pathways	-log(p-value)	zScore	Molecules
Type II Diabetes Mellitus Signaling	3.11	-3.16228	ACSL1,CEBPB,IRS2,NFKB1,NFKB2,NFKBIA,NFKBIB,NFKBID,NFKBIE,NSMAF,PIK3R5,TNFRSF1B
IL-6 Signaling	13.8	-3	CEBPB,CSNK2B,CXCL8,FOS,IL1A,IL1B,IL1R2,IL1RAP,IL1RL1,IL1RN,MAP2K3,MAP4K4,MCL1,NFKB1,NFKB2,NFKBIA,NFKBIB,NFKBID,NFKBIE,PIK3R5,RALB,STAT3,TNFAIP6,TNFRSF1B,VEGFA
IL-1 Signaling	8.17	-2.88675	FOS,GNB2,GNG10,GNG2,GNG5,IL1A,IL1RAP,IRAK2,IRAK3,MAP2K3,NFKB1,NFKB2,NFKBIA,NFKBIB,NFKBID,NFKBIE
Coronavirus Pathogenesis Pathway	14.6	-2.74563	ADAM17,CASP1,CTSL,CXCL8,DDIT3,EEF1A1,FAU,FOS,IL1B,NFKB1,NFKB2,NFKBIA,NFKBIB,NFKBID,NFKBIE,NLRP3,PTGS2,PYCARD,RPS10,RPS13,RPS27A,RPS28,RPS3A,RPS7,RPS9,SIN3A,STAT3,TBK1
FAT10 Cancer Signaling Pathway	3.52	-2.64575	CXCR4,EEF1A1,NFKB1,NFKB2,NFKBIA,STAT3,TNFRSF1B
Dendritic Cell Maturation	7.81	-2.4004	B2M,CD83,FCER1G,FCGR1A,FCGR1B,FCGR3A/FCGR3B,HLA-A,HLA-C,ICAM1,IL1A,IL1B,IL1RN,NFKB1,NFKB2,NFKBIA,NFKBIB,NFKBID,NFKBIE,PIK3R5,TLR2,TNFRSF1B,TYROBP
Systemic Lupus Erythematosus In B Cell Signaling Pathway	6.98	-2.35339	CXCL8,FGR,FOS,FOXO3,HCK,IFIT3,IFNGR2,IL1A,IL1B,MAP4K4,MCL1,NFAT5,NFKB1,NFKB2,OSM,PIK3AP1,PIK3R5,PIM2,RAC1,RALB,STAT3,TBK1,TNFSF13B,TNFSF14,TRAF1,VAV1
NF-κB Activation by Viruses	3.51	-2.33333	NFKB1,NFKB2,NFKBIA,NFKBIB,NFKBID,NFKBIE,PIK3R5,RALB,TNFRSF14
TREM1 Signaling	8.57	-2.32379	CASP1,CCL3,CD83,CXCL8,ICAM1,IL1B,IL1RL1,ITGAX,NFKB1,NFKB2,NLRP3,STAT3,TLR2,TREM1,TYROBP
Type I Diabetes Mellitus Signaling	5.47	-2.3094	FCER1G,HLA-A,HLA-C,IFNGR2,IL1B,IL1RAP,MAP2K3,NFKB1,NFKB2,NFKBIA,NFKBIB,NFKBID,NFKBIE,TNFRSF1B
Small Cell Lung Cancer Signaling	4.49	-2.23607	NFKB1,NFKB2,NFKBIA,NFKBIB,NFKBID,NFKBIE,PIK3R5,PTGS2,SIN3A,TRAF1
Hypoxia Signaling in the Cardiovascular System	3.6	-2.23607	NFKBIA,NFKBIB,NFKBID,NFKBIE,UBE2D1,UBE2D3,UBE2L6,UBE2V1,VEGFA
Role of IL-17F in Allergic Inflammatory Airway Diseases	2.14	-2.23607	CCL4,CXCL8,IL1B,NFKB1,NFKB2
Senescence Pathway	3	-2.18282	ANAPC13,CEBPB,CXCL8,FOXO3,GADD45B,HBP1,IL1A,MAP2K3,MAPK6,NBN,NFAT5,NFKB1,NFKB2,PIK3R5,RALB,SQSTM1,TBK1,TLR2
PI3K Signaling in B Lymphocytes	5.67	-2.13809	FOS,FOXO3,IL4R,IRS2,NFAT5,NFKB1,NFKB2,NFKBIA,NFKBIB,NFKBID,NFKBIE,PIK3AP1,PTPRC,RAC1,RALB,VAV1
iCOS-iCOSL Signaling in T Helper Cells	5.47	-2.12132	FCER1G,HLA-A,LCP2,NFAT5,NFKB1,NFKB2,NFKBIA,NFKBIB,NFKBID,NFKBIE,PIK3R5,PTPRC,RAC1,VAV1
MIF-mediated Glucocorticoid Regulation	5.4	-2.12132	LY96,NFKB1,NFKB2,NFKBIA,NFKBIB,NFKBID,NFKBIE,PTGS2
PI3K/AKT Signaling	5.23	-2.12132	CXCR1,CXCR2,FOXO3,IL10RA,IL10RB,IL18R1,IL1R2,IL1RL1,IL4R,MCL1,NFKB1,NFKB2,NFKBIA,NFKBIB,NFKBID,NFKBIE,PTGS2,RALB
Th2 Pathway	3.27	-2.12132	CCR1,CHD4,CXCR4,HLA-A,ICAM1,IL1RL1,IL4R,NFKB1,PIK3R5,PSEN1,PSENEN,VAV1
TNFR2 Signaling	10.8	-2.11058	FOS,NFKB1,NFKB2,NFKBIA,NFKBIB,NFKBID,NFKBIE,TANK,TBK1,TNFAIP3,TNFRSF1B,TRAF1
Breast Cancer Regulation by Stathmin1	3.05	-2.04265	ADGRE1,ADGRE5,ADGRG3,ADORA2A,ARHGEF2,CCR1,CXCR1,FFAR2,FPR1,GNB2,GNG10,GNG2,GNG5,GPR108,GPR84,HCAR3,LTB4R,NFKB1,NFKB2,PIK3R5,PPP1R10,PTAFR,PTGER4,RAC1,RALB,RHOA,RLIM,STAT3,SUCNR1,TUBA1A,VEGFA
RhoGDI Signaling	6.28	-2	ACTB,ACTG1,ACTR3,ARHGAP9,ARHGDIA,ARHGEF2,ARPC1B,ARPC3,GNB2,GNG10,GNG2,GNG5,LIMK2,MYL12A,MYL12B,MYL6,RAC1,RHOA,RHOG,RHOH
PKCθ Signaling in T Lymphocytes	5.01	-2	FCER1G,FOS,HLA-A,LCP2,MAP3K11,NFAT5,NFKB1,NFKB2,NFKBIA,NFKBIB,NFKBID,NFKBIE,PIK3R5,RAC1,RALB,VAV1
B Cell Receptor Signaling	4.59	-2	APBB1IP,BCL2A1,MAP2K3,MAP3K11,NFAT5,NFKB1,NFKB2,NFKBIA,NFKBIB,NFKBID,NFKBIE,PIK3AP1,PIK3R5,PTPRC,RAC1,RALB,VAV1
Role of RIG1-like Receptors in Antiviral Innate Immunity	4.52	-2	NFKB1,NFKB2,NFKBIA,NFKBIB,NFKBID,NFKBIE,TANK,TBK1
Differential Regulation of Cytokine Production in Intestinal Epithelial Cells by IL-17A and IL-17F	2.42	-2	CCL3,CCL4,IL1A,IL1B
Integrin Signaling	5.47	2.06474	ACTB,ACTG1,ACTR3,ARHGAP26,ARPC1B,ARPC3,ITGA7,ITGAX,MAP3K11,MYL12A,MYL12B,NEDD9,PFN1,PIK3R5,RAC1,RALB,RHOA,RHOG,RHOH,VASP
Antioxidant Action of Vitamin C	3.54	2.12132	GSTO1,HMOX1,NFKB1,NFKB2,NFKBIA,NFKBIB,NFKBID,NFKBIE,PNPLA8,TXN,TXNRD1
Semaphorin Neuronal Repulsive Signaling Pathway	1.34	2.12132	LIMK2,MAP2K3,MYL12A,MYL12B,MYL6,PIK3R5,RAC1,RHOA
PPAR Signaling	8.15	2.18282	FOS,IL1A,IL1B,IL1R2,IL1RAP,IL1RL1,IL1RN,MAP4K4,NFKB1,NFKB2,NFKBIA,NFKBIB,NFKBID,NFKBIE,PTGS2,RALB,TNFRSF1B
Interferon Signaling	2.47	2.23607	IFIT3,IFITM1,IFITM2,IFITM3,IFNGR2
Erythropoietin Signaling Pathway	5.61	2.35702	CXCL8,FOS,FOXO3,IL1A,IL1B,IRS2,NFKB1,NFKB2,NFKBIA,NFKBIB,NFKBID,NFKBIE,OSM,PIK3R5,RAC1,RALB,TNFSF13B,TNFSF14
EIF2 Signaling	11.7	3	ACTB,AGO2,DDIT3,EIF1,EIF4A1,EIF5,FAU,PIK3R5,PPP1R15A,RALB,RPL12,RPL18,RPL19,RPL28,RPL30,RPL32,RPL34,RPL36AL,RPL37,RPL39,RPL6,RPL8,RPS10,RPS13,RPS27A,RPS28,RPS3A,RPS7,RPS9,VEGFA
Oxidative Phosphorylation	2.95	3.16228	ATP5F1E,ATP5ME,COX17,COX5B,COX6A1,COX7A2,NDUFA1,NDUFA13,NDUFA3,NDUFB3

## Sheet: Tcell_VAP_vs_NOVAP_EarlyTime
Ingenuity Canonical Pathways	-log(p-value)	zScore	Molecules
Phospholipase C Signaling	4.71	-3.41121	ARHGEF1,ARHGEF3,CALM1 (includes others),CAMK4,CD3D,CD3G,CD79B,FCER1G,FYN,GNB2,GNB5,GNG2,GRAP2,HDAC7,HMOX1,ITGA1,ITGA4,ITGAL,ITK,LAT,LCK,MPRIP,PEBP1,PLCG1,PRKCH,PRKCQ,RAC1,RAC2,RELA,RHOF,RHOH,ZAP70
Cardiac Hypertrophy Signaling (Enhanced)	1.7	-3.18198	CALM1 (includes others),CAMK4,CD40LG,CD70,CYBB,GDE1,GNG2,HDAC7,IFNG,IL10RA,IL12RB2,IL18,IL18RAP,IL1B,IL21R,IL27RA,IL2RA,IL2RB,IL4R,IL6,ITGA1,ITGA4,ITGAL,JUN,LTA,LTB,MAP2K7,PDE3B,PDE4B,PDE4D,PIK3CD,PLCG1,PRKCH,PRKCQ,RELA,RPS6KA5,TGFBR2,TNFSF10
Natural Killer Cell Signaling	9.36	-3.08697	CD226,CD48,FCER1G,FYN,HLA-C,HLA-E,IFNG,IL12RB2,IL18,IL18RAP,IL2RB,ITGAL,KLRB1,KLRC1,KLRC4-KLRK1/KLRK1,KLRD1,LAT,LCK,LILRB1,MICB,NCR3,NECTIN2,PIK3CD,PLCG1,PRKCQ,PTK2B,RAC1,RAC2,RASSF5,RELA,SH2D1A,STAT4,TNFSF10,TYROBP,ZAP70
Superpathway of Inositol Phosphate Compounds	1.94	-2.9824	ATP1A1,CDC25B,DUSP10,DUSP11,DUSP12,IGBP1,INPP5D,IP6K2,NUDT4,PDCD1,PIK3CD,PLCG1,PPM1K,PPP1R16B,PTPN22,PTPN7,PTPRC,SOCS3,TNS3
Retinoic acid Mediated Apoptosis Signaling	1.38	-2.64575	CASP8,DAP3,IFNG,IRF1,PARP16,PARP8,TNFSF10
Prolactin Signaling	2.39	-2.52982	FYN,IRF1,JUN,NR3C1,PIK3CD,PLCG1,PRKCH,PRKCQ,SOCS1,SOCS2,SOCS3
CD28 Signaling in T Helper Cells	8.93	-2.52357	ARPC1B,ARPC5L,CALM1 (includes others),CAMK4,CARD11,CD3D,CD3G,CD86,FCER1G,FYN,GRAP2,HLA-DMA,HLA-DQA1,HLA-DRA,HLA-DRB1,ITK,JUN,LAT,LCK,PIK3CD,PLCG1,PRKCQ,PTPRC,RAC1,RELA,ZAP70
3-phosphoinositide Degradation	3.11	-2.52357	ATP1A1,CDC25B,DUSP10,DUSP11,DUSP12,IGBP1,INPP4A,INPP4B,INPP5D,NUDT4,PDCD1,PPM1K,PPP1R16B,PTPMT1,PTPN22,PTPN7,PTPRC,SOCS3,TNS3
D-myo-inositol-5-phosphate Metabolism	1.96	-2.5	ATP1A1,CDC25B,DUSP10,DUSP11,DUSP12,IGBP1,NUDT4,PDCD1,PLCG1,PPM1K,PPP1R16B,PTPN22,PTPN7,PTPRC,SOCS3,TNS3
3-phosphoinositide Biosynthesis	1.75	-2.5	ATP1A1,CDC25B,DUSP10,DUSP11,DUSP12,IGBP1,NUDT4,PDCD1,PIK3CD,PPM1K,PPP1R16B,PTPN22,PTPN7,PTPRC,SOCS3,TNS3
IL-15 Production	1.86	-2.49615	CLK1,FLT3LG,FYN,IL6,IRF1,IRF3,ITK,JAK1,LCK,MAP2K7,PTK2B,RELA,ZAP70
Senescence Pathway	2.11	-2.44949	ANAPC5,ATM,CALM1 (includes others),CAMK4,CBX7,CCNB1,CDC25B,CDK6,CDKN1B,DMTF1,ELF1,IL6,IRF3,JUN,KAT2B,MAP2K7,PHF1,PIK3CD,PPP2CA,PPP2R2B,PPP2R5C,RASSF5,RPS6KA5,SOD2,TGFBR2
Tec Kinase Signaling	5.67	-2.35702	ACTB,ACTG1,FCER1G,FYN,GNB2,GNB5,GNG2,ITGA1,ITGA4,ITGAL,ITK,JAK1,LCK,PIK3CD,PLCG1,PRKCH,PRKCQ,PTK2B,RAC1,RAC2,RELA,RHOF,RHOH,STAT4,TNFRSF25,TNFSF10
D-myo-inositol (1,4,5,6)-Tetrakisphosphate Biosynthesis	2	-2.32379	ATP1A1,CDC25B,DUSP10,DUSP11,DUSP12,IGBP1,NUDT4,PDCD1,PPM1K,PPP1R16B,PTPN22,PTPN7,PTPRC,SOCS3,TNS3
D-myo-inositol (3,4,5,6)-tetrakisphosphate Biosynthesis	2	-2.32379	ATP1A1,CDC25B,DUSP10,DUSP11,DUSP12,IGBP1,NUDT4,PDCD1,PPM1K,PPP1R16B,PTPN22,PTPN7,PTPRC,SOCS3,TNS3
Gαq Signaling	1.96	-2.3094	CALM1 (includes others),CAMK4,GNB2,GNB5,GNG2,HMOX1,PIK3CD,PLCG1,PRKCH,PRKCQ,PTK2B,RAC1,RAC2,RELA,RHOF,RHOH
Regulation Of The Epithelial Mesenchymal Transition By Growth Factors Pathway	1.58	-2.18282	CD40LG,CD70,DOCK10,FOXO1,IL6,JAK1,JUN,LTA,LTB,MAP2K7,PIK3CD,RAC1,RELA,TGFBR2,TNFSF10,VIM,ZEB1
CCR5 Signaling in Macrophages	3.3	-2.12132	CALM1 (includes others),CAMK4,CCL5,CD3D,CD3G,FCER1G,GNB2,GNB5,GNG2,JUN,PLCG1,PRKCH,PRKCQ,PTK2B
Cell Cycle Control of Chromosomal Replication	2	-2.12132	CDK11A,CDK13,CDK17,CDK6,CDT1,DBF4,ORC5,POLD1
Growth Hormone Signaling	1.43	-2.12132	PIK3CD,PLCG1,PRKCH,PRKCQ,RPS6KA5,SOCS1,SOCS2,SOCS3
Sperm Motility	1.47	-2.11058	CALM1 (includes others),CAMK4,CLK1,FLT3LG,FYN,ITK,JAK1,LCK,MAP2K7,PDE4B,PDE4D,PLA2G7,PLAAT3,PLAAT4,PLCG1,PRKCH,PRKCQ,PTK2B,ZAP70
Systemic Lupus Erythematosus In B Cell Signaling Pathway	5.22	-2.05798	BCL2,CALM1 (includes others),CAMK4,CARD11,CD40,CD40LG,CD70,CD79B,FOXO1,FYN,IFNG,IL18,IL1B,IL6,INPP5D,IRF3,JAK1,JUN,LCK,LILRB4,LTA,LTB,PAG1,PDCD1,PIK3CD,PIM2,PLAAT4,PRKCH,PRKCQ,RAC1,RAC2,RASGRP1,RELA,TNFSF10
HMGB1 Signaling	3.64	-2	CD40LG,CD70,IFNG,IL18,IL1B,IL6,JUN,KAT2B,KAT6A,KAT6B,KAT7,LTA,LTB,MAP2K7,PIK3CD,RAC1,RAC2,RELA,RHOF,RHOH,TNFSF10
Cholesterol Biosynthesis I	2.39	-2	EBP,FDFT1,HSD17B7,SC5D
Cholesterol Biosynthesis II (via 24,25-dihydrolanosterol)	2.39	-2	EBP,FDFT1,HSD17B7,SC5D
Cholesterol Biosynthesis III (via Desmosterol)	2.39	-2	EBP,FDFT1,HSD17B7,SC5D
Tumoricidal Function of Hepatic Natural Killer Cells	2.09	-2	CASP6,CASP8,GZMB,ITGAL,PRF1
Integrin Signaling	1.93	-2	ACTB,ACTG1,ARPC1B,ARPC5L,FYN,GSN,ITGA1,ITGA4,ITGAE,ITGAL,ITGB7,MPRIP,NEDD9,PIK3CD,PLCG1,RAC1,RAC2,RHOF,RHOH,ZYX
Cyclins and Cell Cycle Regulation	2.39	2.12132	ATM,CCNB1,CDK6,CDKN1B,CDKN2C,HDAC7,PA2G4,PPP2CA,PPP2R2B,PPP2R5C,SUV39H1

## Sheet: MonoMac_VAP_EarlyvsLateTime
Ingenuity Canonical Pathways	-log(p-value)	zScore	Molecules
Oxidative Phosphorylation	39.5	-7.21605	ATP5F1A,ATP5F1C,ATP5F1D,ATP5F1E,ATP5MC1,ATP5MC2,ATP5MC3,ATP5ME,ATP5MF,ATP5MG,ATP5PB,ATP5PD,ATP5PF,ATP5PO,COX17,COX4I1,COX5A,COX5B,COX6B1,COX6C,COX7A2,COX7A2L,COX7B,COX8A,CYB5A,NDUFA1,NDUFA12,NDUFA13,NDUFA2,NDUFA3,NDUFA4,NDUFA6,NDUFA8,NDUFAB1,NDUFB1,NDUFB10,NDUFB2,NDUFB3,NDUFB4,NDUFB6,NDUFB7,NDUFB9,NDUFS3,NDUFS5,NDUFS7,NDUFS8,SDHB,SDHC,SDHD,UQCR10,UQCR11,UQCRB,UQCRC1,UQCRH,UQCRQ,VPS9D1
EIF2 Signaling	30.3	-5.60449	AGO2,ATF3,ATF4,ATF5,DDIT3,EIF2AK2,EIF2S1,EIF3K,EIF3M,EIF4A1,EIF4A3,EIF5B,FAU,PPP1CA,PPP1R15A,RALA,RASD1,RPL10,RPL11,RPL12,RPL14,RPL15,RPL17,RPL18,RPL18A,RPL19,RPL21,RPL22,RPL26,RPL26L1,RPL29,RPL30,RPL32,RPL34,RPL35,RPL36AL,RPL39,RPL5,RPL6,RPL7,RPL7A,RPL8,RPL9,RPLP0,RPLP1,RPS12,RPS13,RPS14,RPS15,RPS15A,RPS20,RPS23,RPS24,RPS26,RPS27A,RPS27L,RPS29,RPS3,RPS3A,RPS4X,RPS4Y1,RPS5,RPS6,RPS7,RPS8,RPSA,VEG…
LXR/RXR Activation	5.26	-3.5	ABCA1,APOC1,APOC2,APOE,ECHS1,IL1A,IL1B,IL1RN,IL6,LDLR,LPL,MSR1,MYLIP,NCOR2,NFKB1,NFKB2,PTGS2,RBP4,S100A8,TNF,TNFRSF1B
PPAR Signaling	5.09	-2.82843	FOS,HSP90AB1,HSP90B1,IL1A,IL1B,IL1RN,NCOR2,NFKB1,NFKB2,NFKBIA,NFKBID,NFKBIE,PPARG,PTGS2,RALA,RASD1,STAT5A,TNF,TNFRSF1B
NER Pathway	3.09	-2.67261	COPS3,COPS6,GTF2H5,H3-3A/H3-3B,NEDD8,POLD4,POLE3,POLE4,POLR2F,POLR2G,POLR2I,POLR2K,RBX1,RPA3,TCEA1
Coronavirus Replication Pathway	3.71	-2.52982	COPZ1,CTSL,IFITM1,IFITM2,IFITM3,TUBA1B,TUBA1C,TUBB,TUBB4B,ZCRB1
Glutathione Redox Reactions I	2.7	-2.44949	GPX4,GSTP1,MGST1,MGST2,MGST3,PRDX6
TCA Cycle II (Eukaryotic)	2.7	-2.44949	MDH1,MDH2,SDHB,SDHC,SDHD,SUCLG1
Gluconeogenesis I	2.51	-2.44949	ALDOA,ENO1,FBP1,GAPDH,MDH1,MDH2
Assembly of RNA Polymerase II Complex	2.13	-2.12132	GTF2A2,GTF2B,GTF2H5,POLR2F,POLR2G,POLR2I,POLR2K,TAF9
Bile Acid Biosynthesis, Neutral Pathway	2.29	-2	AKR1C3,CYP27A1,HSD3B7,SCP2
Complement System	1.74	-2	C1QA,C1QB,C1QC,CD55,CD59,ITGAX
4-1BB Signaling in T Lymphocytes	2.71	2	NFKB1,NFKB2,NFKBIA,NFKBID,NFKBIE,TNFSF9,TRAF1
Hepatic Fibrosis Signaling Pathway	4.76	2.03026	ATF4,CALM1 (includes others),CCL3,CEBPB,CXCL8,FLT1,FNBP1,FOS,FTL,HIF1A,ICAM1,IL1A,IL1B,IL1RN,IRAK2,ITGA5,MAP2K3,MYL12B,MYL6,NFKB1,NFKB2,NFKBIA,NFKBID,NFKBIE,PPARG,RAC1,RALA,RASD1,RHOA,RHOH,SDHB,SDHC,SDHD,SNAI1,SOD2,SPP1,STAT3,TCF4,TGFB1,TIMP1,TNF,TNFRSF1B,VEGFA
Production of Nitric Oxide and Reactive Oxygen Species in Macrophages	4.04	2.04124	APOC1,APOC2,APOE,CYBA,FNBP1,FOS,IRF1,MAP3K11,MAP3K8,NFKB1,NFKB2,NFKBIA,NFKBID,NFKBIE,PPP1CA,PPP1R10,RAC1,RBP4,RHOA,RHOH,S100A8,SPI1,TLR2,TNF,TNFRSF1B
HIF1α Signaling	3.48	2.04124	ADM,CDKN1A,EIF4EBP1,ELOB,ELOC,FLT1,HIF1A,HSPA1A/HSPA1B,HSPA2,HSPA6,IL6,IL6R,LDHB,MAP2K3,RACK1,RALA,RAN,RASD1,RBX1,RPS6,SAT1,SLC2A3,STAT3,TGFB1,VEGFA
Interferon Signaling	5.45	2.11058	BAX,IFIT1,IFIT3,IFITM1,IFITM2,IFITM3,IRF1,ISG15,MX1,OAS1,SOCS1
IL-23 Signaling Pathway	4.53	2.11058	HIF1A,IL1B,IL23A,NFKB1,NFKB2,NFKBIA,RUNX1,SOCS3,STAT3,STAT4,TNF
TNFR1 Signaling	2.7	2.12132	BIRC3,FOS,NFKB1,NFKB2,NFKBIA,NFKBID,NFKBIE,TNF,TNFAIP3
Role of Pattern Recognition Receptors in Recognition of Bacteria and Viruses	8.44	2.18282	C1QA,C1QB,C1QC,CLCF1,CXCL8,DDX58,EIF2AK2,EIF2S1,IFIH1,IL10,IL1A,IL1B,IL6,IRF7,NFKB1,NFKB2,NLRP3,OAS1,OAS2,OAS3,OSM,RIPK2,TGFB1,TLR2,TNF,TNFSF10,TNFSF13B,TNFSF14,TNFSF8,TNFSF9
B Cell Activating Factor Signaling	3.35	2.23607	FOS,NFAT5,NFKB1,NFKB2,NFKBIA,NFKBID,NFKBIE,TNFSF13B,TRAF1
Natural Killer Cell Signaling	5.03	2.26779	B2M,CD48,CFL1,FCER1G,FCGR2A,HLA-B,HLA-E,HSPA1A/HSPA1B,HSPA2,HSPA6,LCP2,LILRB1,LIMK2,MAP2K3,MAP3K11,MAP3K8,NCK1,NECTIN2,NFAT5,NFKB1,NFKB2,RAC1,RALA,RASD1,STAT4,TNFSF10,TYROBP,VAV1
TNFR2 Signaling	6.35	2.33333	BIRC3,FOS,NFKB1,NFKB2,NFKBIA,NFKBID,NFKBIE,TNF,TNFAIP3,TNFRSF1B,TRAF1
Toll-like Receptor Signaling	5.26	2.33333	EIF2AK2,FOS,IL1A,IL1B,IL1RN,IRAK2,MAP2K3,NFKB1,NFKB2,NFKBIA,RPS27A,TLR2,TNF,TNFAIP3,TRAF1,UBC
Role of IL-17F in Allergic Inflammatory Airway Diseases	3.88	2.33333	ATF4,CCL4,CXCL10,CXCL5,CXCL8,IL1B,IL6,NFKB1,NFKB2,TRAF3IP2
B Cell Receptor Signaling	2.26	2.35702	ATF4,BCL2A1,CALM1 (includes others),CFL1,EGR1,FCGR2A,MAP2K3,MAP3K11,MAP3K8,NFAT5,NFKB1,NFKB2,NFKBIA,NFKBID,NFKBIE,PIK3AP1,RAC1,RALA,RASD1,VAV1
MSP-RON Signaling In Macrophages Pathway	7.64	2.44949	ATF4,ETV3,FOS,HLA-DMA,HLA-DMB,HLA-DPA1,HLA-DPB1,HLA-DQA1,HLA-DQB1,HLA-DRA,HLA-DRB1,HLA-DRB5,IL10,NFKB1,NFKB2,NFKBIZ,PTGS2,RALA,RASD1,SBNO2,SOCS1,SOCS3,STAT3,TNF
Differential Regulation of Cytokine Production in Macrophages and T Helper Cells by IL-17A and IL-17F	3.43	2.44949	CCL3,CCL4,IL10,IL1B,IL6,TNF
Hypoxia Signaling in the Cardiovascular System	2.48	2.44949	ATF4,CSNK1D,HIF1A,HSP90AB1,HSP90B1,NFKBIA,NFKBID,NFKBIE,UBE2B,UBE2S,VEGFA
Cholecystokinin/Gastrin-mediated Signaling	2.45	2.49615	CREM,FNBP1,FOS,IL1A,IL1B,IL1RN,MAP2K3,PTGS2,RAC1,RALA,RASD1,RHOA,RHOH,SRC,TNF
p38 MAPK Signaling	1.73	2.49615	ATF4,DDIT3,DUSP1,H3-3A/H3-3B,HSPB1,IL1A,IL1B,IL1RN,IRAK2,MAP2K3,TGFB1,TNF,TNFRSF1B
PI3K Signaling in B Lymphocytes	3	2.5	ATF3,ATF4,ATF5,CALM1 (includes others),CD81,FOS,IL4R,NFAT5,NFKB1,NFKB2,NFKBIA,NFKBID,NFKBIE,PIK3AP1,RAC1,RALA,RASD1,VAV1
Aryl Hydrocarbon Receptor Signaling	6.2	2.52357	BAX,CDKN1A,CTSD,FOS,GSTO1,GSTP1,HSP90AB1,HSP90B1,HSPB1,IL1A,IL1B,IL6,MGST1,MGST2,MGST3,NCOA7,NCOR2,NEDD8,NFE2L2,NFKB1,NFKB2,PTGES3,SRC,TGFB1,TNF
HMGB1 Signaling	5.54	2.52357	CLCF1,CXCL8,FNBP1,FOS,HMGB1,ICAM1,IL1A,IL1B,IL6,MAP2K3,NFKB1,NFKB2,OSM,RAC1,RALA,RASD1,RHOA,RHOH,TGFB1,TNF,TNFRSF1B,TNFSF10,TNFSF13B,TNFSF14,TNFSF8,TNFSF9
Differential Regulation of Cytokine Production in Intestinal Epithelial Cells by IL-17A and IL-17F	3.65	2.64575	CCL3,CCL4,DEFB1,IL10,IL1A,IL1B,TNF
CD27 Signaling in Lymphocytes	3.1	2.64575	FOS,MAP2K3,MAP3K11,MAP3K8,NFKB1,NFKB2,NFKBIA,NFKBID,NFKBIE,SIVA1
iNOS Signaling	3.03	2.64575	CALM1 (includes others),FOS,IRAK2,IRF1,NFKB1,NFKB2,NFKBIA,NFKBID,NFKBIE
Colorectal Cancer Metastasis Signaling	1.44	2.68328	BAX,FNBP1,FOS,GNG2,GNG5,IL6,IL6R,NFKB1,NFKB2,PTGS2,RAC1,RALA,RASD1,RHOA,RHOH,SRC,STAT3,TCF4,TGFB1,TLR2,TNF,VEGFA
Osteoarthritis Pathway	5.42	2.74563	ANXA2,ATF4,CASP4,CEBPB,CXCL8,DDIT4,HES1,HIF1A,HMGB1,IL1B,ITGA5,MTF1,NAMPT,NFKB1,NFKB2,PPARG,PTGS2,RAC1,RBP4,S100A8,S100A9,SDC4,SLC39A8,SPHK1,SPP1,TCF4,TGFB1,TLR2,TNF,TNFRSF1B,VEGFA
Senescence Pathway	2.3	2.74563	ANAPC11,ATF3,CALM1 (includes others),CDKN1A,CEBPB,CGAS,CXCL8,EIF4EBP1,ETS2,GADD45B,GADD45G,HBP1,IL1A,IL6,ING1,MAP2K3,NFAT5,NFKB1,NFKB2,PML,PPP1CA,RALA,RASD1,SOD2,SQSTM1,TGFB1,TLR2
Sirtuin Signaling Pathway	25.1	2.77143	ABCA1,ATP5F1A,ATP5F1C,ATP5F1D,ATP5F1E,ATP5MC1,ATP5PB,ATP5PF,BAX,CXCL8,DOT1L,GABARAP,GADD45B,GADD45G,GLS,H1-0,H3-3A/H3-3B,HIF1A,LDHB,NAMPT,NDRG1,NDUFA1,NDUFA12,NDUFA13,NDUFA2,NDUFA3,NDUFA4,NDUFA6,NDUFA8,NDUFAB1,NDUFB1,NDUFB10,NDUFB2,NDUFB3,NDUFB4,NDUFB6,NDUFB7,NDUFB9,NDUFS3,NDUFS5,NDUFS7,NDUFS8,NFE2L2,NFKB1,NFKB2,PAM16,PFKFB3,POLR2F,PPARG,PPIF,SDHB,SDHC,SDHD,SLC25A5,SMARCA5,SOD1,SOD2,STAT3,TIMM10,…
FAT10 Cancer Signaling Pathway	2.36	2.82843	IL6,NFKB1,NFKB2,NFKBIA,STAT3,TGFB1,TNF,TNFRSF1B
Tec Kinase Signaling	2.99	2.84019	FCER1G,FNBP1,FOS,GNA15,GNG2,GNG5,HCK,ITGA5,NFKB1,NFKB2,RAC1,RHOA,RHOH,SRC,STAT3,STAT4,STAT5A,TNF,TNFRSF10B,TNFSF10,VAV1
MSP-RON Signaling In Cancer Cells Pathway	1.98	2.84019	ATF4,ETS2,FLNA,FOS,HIF1A,NFKB1,NFKB2,NFKBIA,PLAUR,RALA,RASD1,SRC,STAT3,TCF4,VEGFA
T Cell Exhaustion Signaling Pathway	5.06	2.88675	BATF,CD274,FCER1G,FOS,HLA-B,HLA-DMA,HLA-DMB,HLA-DPA1,HLA-DPB1,HLA-DQA1,HLA-DQB1,HLA-DRA,HLA-DRB1,HLA-DRB5,HLA-E,IL10,IL10RA,IL6,IL6R,NFAT5,RALA,RASD1,STAT3,STAT4,TGFB1,VEGFA
IL-1 Signaling	2.19	3	FOS,GNA15,GNG2,GNG5,IL1A,IRAK2,MAP2K3,NFKB1,NFKB2,NFKBIA,NFKBID,NFKBIE
HER-2 Signaling in Breast Cancer	6.62	3.05329	AREG,CDKN1A,COPS6,COX17,COX4I1,COX5A,COX5B,COX6B1,COX6C,COX7A2,COX7A2L,COX7B,COX8A,CYB5A,ETS2,FCER1G,FOS,HBEGF,HCK,IL1A,NFKB1,NFKB2,NFKBIA,NFKBID,NFKBIE,PTGS2,RALA,RASD1,RPS6,SRC,STAT3
IL-6 Signaling	7.31	3.26599	CEBPB,CXCL8,FOS,HSPB1,IL1A,IL1B,IL1RN,IL6,IL6R,MAP2K3,MCL1,NFKB1,NFKB2,NFKBIA,NFKBID,NFKBIE,RALA,RASD1,SOCS1,SOCS3,STAT3,TNF,TNFAIP6,TNFRSF1B,VEGFA
Tumor Microenvironment Pathway	6	3.40168	CD274,CD44,CFLAR,CXCL8,FOS,HIF1A,HLA-B,HLA-E,ICAM1,IDO1,IL10,IL1B,IL6,IL6R,ITGA5,NFKB1,NFKB2,OSM,PTGS2,RAC1,RALA,RASD1,SLC2A3,SPP1,STAT3,TGFB1,TNF,VEGFA
Th17 Activation Pathway	6.73	3.44124	BATF,CCL20,DEFB1,FCER1G,HIF1A,HSP90AB1,HSP90B1,IL10,IL1B,IL23A,IL6,IL6R,IRAK2,NFAT5,NFKB1,NFKB2,RUNX1,SOCS3,STAT3,STAT4
Regulation Of The Epithelial Mesenchymal Transition By Growth Factors Pathway	3.27	3.54475	EGR1,FOS,ID2,IL6,IL6R,MAP2K3,NFKB1,NFKB2,RAC1,RALA,RASD1,RHOA,SNAI1,STAT3,TGFB1,TNF,TNFRSF1B,TNFSF10,TNFSF13B,TNFSF14,TNFSF8,TNFSF9,ZEB2
TREM1 Signaling	6.02	3.63803	CCL3,CD83,CXCL8,ICAM1,IL10,IL1B,IL6,ITGA5,ITGAX,NFKB1,NFKB2,NLRP3,STAT3,STAT5A,TLR2,TNF,TYROBP
IL-17 Signaling	5.47	3.77964	CCL20,CEBPB,CLCF1,CXCL5,CXCL8,DEFB1,FOS,HSP90AB1,HSP90B1,IL1A,IL1B,IL6,MAP2K3,NFKB1,OSM,PTGS2,RALA,RASD1,RGS16,TGFB1,TNF,TNFSF10,TNFSF13B,TNFSF14,TNFSF8,TNFSF9,TRAF3IP2,VEGFA
Cardiac Hypertrophy Signaling (Enhanced)	2.27	4	ADRA2B,ADRB2,CALM1 (includes others),CLCF1,CXCL8,DIAPH2,EIF4EBP1,GNA15,GNG2,GNG5,HSPB1,IL10RA,IL15RA,IL1A,IL1B,IL4R,IL6,IL6R,ITGA5,MAP2K3,MAP3K11,MAP3K20,MAP3K8,NFAT5,NFKB1,NFKB2,OSM,PDE4A,PDE4B,PTGS2,RALA,RASD1,RHOA,RPS6,STAT3,TGFB1,TNF,TNFRSF1B,TNFSF10,TNFSF13B,TNFSF14,TNFSF8,TNFSF9
Coronavirus Pathogenesis Pathway	20	4.42246	ATF4,BAX,CTSL,CXCL8,DDIT3,DDX58,FAU,FOS,IL1B,IL6,IRF7,NFKB1,NFKB2,NFKBIA,NFKBID,NFKBIE,NLRP3,NPM1,PA2G4,PTGS2,PYCARD,RPS12,RPS13,RPS14,RPS15,RPS15A,RPS20,RPS23,RPS24,RPS26,RPS27A,RPS27L,RPS29,RPS3,RPS3A,RPS4X,RPS4Y1,RPS5,RPS6,RPS7,RPS8,RPSA,STAT3,TGFB1,TRIM25
Systemic Lupus Erythematosus In B Cell Signaling Pathway	6.27	4.5422	CALM1 (includes others),CLCF1,CXCL8,FCGR2A,FOS,HCK,IFIH1,IFIT2,IFIT3,IL10,IL1A,IL1B,IL6,IL6R,IRF7,ISG15,ISG20,LILRB3,MCL1,NFAT5,NFKB1,NFKB2,OSM,PIK3AP1,RAC1,RALA,RASD1,SRC,STAT3,TGFB1,TNF,TNFSF10,TNFSF13B,TNFSF14,TNFSF8,TNFSF9,TRAF1,VAV1
Role of Hypercytokinemia/hyperchemokinemia in the Pathogenesis of Influenza	12.8	4.81125	AREG,CCL3,CCL4,CXCL10,CXCL8,DDX58,EIF2AK2,IFIT2,IFIT3,IL10,IL1A,IL1B,IL1RN,IL6,IRF7,ISG15,ISG20,MX1,NFKB1,NFKB2,NLRP3,OAS1,OAS2,OAS3,PYCARD,RSAD2,TNF

## Sheet: Neutro_VAP_EarlyvsLateTime
Ingenuity Canonical Pathways	-log(p-value)	zScore	Molecules
EIF2 Signaling	16.1	-4.31455	EIF1,EIF2AK2,EIF4A1,EIF4A3,FAU,PIK3CA,PPP1R15A,RAP1A,RPL12,RPL14,RPL17,RPL18,RPL19,RPL21,RPL22L1,RPL30,RPL32,RPL34,RPL35A,RPL36AL,RPL37,RPL39,RPL39L,RPL41,RPL6,RPL8,RPL9,RPLP1,RPLP2,RPS11,RPS13,RPS15,RPS16,RPS21,RPS26,RPS27,RPS27A,RPS27L,RPS28,RPS3A,RPS7,RPS9,UBA52
Oxidative Phosphorylation	6.11	-3.77124	ATP5F1E,ATP5MC2,ATP5ME,ATP5MG,COX17,COX5B,COX6A1,COX7A2,COX7B,COX8A,NDUFA1,NDUFA3,NDUFB1,NDUFB9,UQCR10,UQCR11,UQCRQ,VPS9D1
Erythropoietin Signaling Pathway	4.3	-2.68328	CXCL8,IL1A,IL1B,IRS2,ITPR1,JUN,LIF,NFKB1,NFKB2,NFKBIA,NFKBID,OSM,PIK3CA,PRKCB,PRKCD,RAP1A,TNF,TNFSF10,TNFSF13B,TNFSF14
Ephrin Receptor Signaling	4.23	-2.68328	ACTR2,ARPC1B,ARPC2,ARPC3,ARPC5,CDC42,CFL1,CREB5,CXCR4,EPHB1,GNAI3,GNAS,GNG10,GNG2,GNG5,GRINA,LIMK2,RAP1A,RHOA,SDCBP,STAT3
Remodeling of Epithelial Adherens Junctions	3.24	-2.64575	ACTR2,APC,ARPC1B,ARPC2,ARPC3,ARPC5,IQGAP1,TUBA1A,TUBB4B,ZYX
Rac Signaling	6.72	-2.52357	ACTR2,ARPC1B,ARPC2,ARPC3,ARPC5,CDC42,CFL1,IQGAP1,JUN,LIMK2,MAP3K1,MAP3K11,NCF1,NCF2,NFKB1,NFKB2,PIK3CA,RAP1A,RHOA,SH3RF1
CXCR4 Signaling	5.04	-2.52357	CDC42,CXCR4,EGR1,GNAI3,GNAS,GNG10,GNG2,GNG5,ITPR1,JUN,LYN,MYL12A,MYL12B,MYL6,PIK3CA,PRKCB,PRKCD,RAP1A,RHOA,RHOB,RHOG
Integrin Signaling	3.49	-2.52357	ACTR2,ARPC1B,ARPC2,ARPC3,ARPC5,CDC42,ITGA7,ITGAX,LIMS1,MAP3K11,MYL12A,MYL12B,PFN1,PIK3CA,PPP1R12A,RAP1A,RHOA,RHOB,RHOG,VASP,ZYX
GDNF Family Ligand-Receptor Interactions	1.37	-2.44949	CDC42,DOK3,IRS2,ITPR1,JUN,PIK3CA,RAP1A
fMLP Signaling in Neutrophils	9.22	-2.4004	ACTR2,ARPC1B,ARPC2,ARPC3,ARPC5,CDC42,FPR1,GNAI3,GNAS,GNG10,GNG2,GNG5,ITPR1,NCF1,NCF2,NFKB1,NFKB2,NFKBIA,NFKBID,PIK3CA,PRKCB,PRKCD,RAP1A
TGF-β Signaling	1.67	-2.33333	CDC42,EP300,IRF7,JUN,MAP2K3,RAP1A,SMAD2,TGFBR1,TGIF1
Regulation of Actin-based Motility by Rho	4.52	-2.13809	ACTR2,ARPC1B,ARPC2,ARPC3,ARPC5,CDC42,CFL1,MYL12A,MYL12B,MYL6,PFN1,PPP1R12A,RHOA,RHOB,RHOG
SAPK/JNK Signaling	2.39	-2.11058	CDC42,FCER1G,GNG2,GNG5,HNRNPK,JUN,MAP3K1,MAP3K11,MAP3K2,PIK3CA,RAP1A
Cdc42 Signaling	4.19	-2.06474	ACTR2,APC,ARPC1B,ARPC2,ARPC3,ARPC5,B2M,CDC42,CDC42EP2,CFL1,FCER1G,IQGAP1,JUN,LIMK2,MAP3K11,MYL12A,MYL12B,MYL6,PPP1R12A,VAV1
Renal Cell Carcinoma Signaling	2.16	-2	CDC42,ELOB,ELOC,EP300,JUN,PIK3CA,RAP1A,RPS27A,UBA52
Differential Regulation of Cytokine Production in Macrophages and T Helper Cells by IL-17A and IL-17F	2.21	2	CCL3,CCL4,IL1B,TNF
Inflammasome pathway	2.04	2	IL1B,NFKB1,NFKB2,NLRP3
Pancreatic Adenocarcinoma Signaling	2.17	2.12132	CDC42,E2F3,JAK3,NFKB1,NFKB2,PIK3CA,PTGS2,RALGDS,SMAD2,STAT3,TGFBR1
Interferon Signaling	11.2	2.13809	IFI35,IFI6,IFIT1,IFIT3,IFITM1,IFITM3,IFNAR1,IFNGR1,IFNGR2,IRF1,IRF9,ISG15,MX1,OAS1,TAP1
Differential Regulation of Cytokine Production in Intestinal Epithelial Cells by IL-17A and IL-17F	2.61	2.23607	CCL3,CCL4,IL1A,IL1B,TNF
Th17 Activation Pathway	1.81	2.33333	CCL20,FCER1G,IL1B,IRAK2,JAK3,NFKB1,NFKB2,SOCS3,STAT3
Coronavirus Pathogenesis Pathway	14.3	2.61116	CXCL8,DDX58,E2F3,EP300,FAU,IFNAR1,IL1B,IRF7,IRF9,JUN,NFKB1,NFKB2,NFKBIA,NFKBID,NLRP3,PTGS2,RPS11,RPS13,RPS15,RPS16,RPS21,RPS26,RPS27,RPS27A,RPS27L,RPS28,RPS3A,RPS7,RPS9,STAT3,TGFBR1,TNPO1,TRIM25
Systemic Lupus Erythematosus In B Cell Signaling Pathway	8.1	3.21159	CXCL8,HCK,IFIH1,IFIT2,IFIT3,IFNAR1,IFNGR1,IFNGR2,IL1A,IL1B,IRF7,IRF9,ISG15,ISG20,JUN,LIF,LILRB3,LYN,MCL1,NFKB1,NFKB2,OSM,PAG1,PIK3CA,PIM2,PRKCB,PRKCD,RAP1A,STAT3,TNF,TNFSF10,TNFSF13B,TNFSF14,TRAF1,VAV1
Role of Hypercytokinemia/hyperchemokinemia in the Pathogenesis of Influenza	13	4.08248	AREG,CCL3,CCL4,CXCL8,DDX58,EIF2AK2,IFIT2,IFIT3,IFNAR1,IL1A,IL1B,IL1RN,IRF7,IRF9,ISG15,ISG20,MX1,NFKB1,NFKB2,NLRP3,OAS1,OAS3,RSAD2,TNF

## Sheet: TCell_VAP_EarlyvsLateTime
Ingenuity Canonical Pathways	-log(p-value)	zScore	Molecules
Oxidative Phosphorylation	18.3	-5.75396	ATP5F1C,ATP5F1E,ATP5MC1,ATP5MC2,ATP5MC3,ATP5ME,ATP5MF,ATP5MG,ATP5PD,ATP5PF,COX4I1,COX6A1,COX6B1,COX6C,COX7A2,COX7A2L,COX7B,COX7C,COX8A,CYB5A,NDUFA1,NDUFA12,NDUFA13,NDUFA2,NDUFA3,NDUFA4,NDUFA6,NDUFB2,NDUFB3,NDUFS7,NDUFV1,UQCR10,UQCR11,UQCRB,UQCRC1,UQCRH,UQCRQ
EIF2 Signaling	22.3	-4.22577	ACTB,EIF1AY,EIF2AK2,EIF4A2,EIF5,FAU,KRAS,MAPK1,PIK3CD,PPP1CA,PPP1CC,PPP1R15A,RPL10,RPL11,RPL12,RPL14,RPL15,RPL18,RPL18A,RPL19,RPL22,RPL24,RPL26,RPL29,RPL30,RPL32,RPL34,RPL35,RPL35A,RPL36AL,RPL39,RPL5,RPL6,RPL7,RPL7A,RPL8,RPL9,RPLP1,RPLP2,RPS11,RPS13,RPS14,RPS15,RPS15A,RPS19,RPS2,RPS21,RPS23,RPS24,RPS26,RPS27A,RPS27L,RPS28,RPS3,RPS3A,RPS7,RPS8,RPSA,UBA52
PPARα/RXRα Activation	1.48	-2.49615	ABCA1,CAND1,HELZ2,HSP90AA1,HSP90AB1,HSP90B1,KRAS,MAP2K7,MAP3K14,MAPK1,MAPK8,NFKB2,NFKBIA,NFKBID,PLCG1,RELA,STAT5B,TGFBR2
Glutathione Redox Reactions I	1.31	-2	GPX4,GSTP1,MGST3,PRDX6
Th17 Activation Pathway	5.93	2.06474	BATF,CCR6,FCER1G,HSP90AA1,HSP90AB1,HSP90B1,IL21R,IL22,JAK3,NFAT5,NFATC2,NFKB2,PTGER4,RELA,RORA,RORC,STAT3,STAT4,TRGV9
Renin-Angiotensin Signaling	1.67	2.11058	CCL5,FOS,KRAS,MAPK1,MAPK8,NFKB2,PIK3CD,PLCG1,PRKCZ,RELA,STAT1,STAT3,TNF
HGF Signaling	1.61	2.11058	ELF1,FOS,ITGB2,KRAS,MAP2K7,MAP3K14,MAP3K2,MAPK1,MAPK8,PIK3CD,PLCG1,PRKCZ,STAT3
TNFR2 Signaling	5.31	2.12132	BIRC3,FOS,MAP3K14,MAPK8,NFKB2,NFKBIA,NFKBID,RELA,TNF,TNFAIP3
B Cell Activating Factor Signaling	4.76	2.12132	FOS,MAP2K7,MAP3K14,MAPK1,MAPK8,NFAT5,NFATC2,NFKB2,NFKBIA,NFKBID,RELA
EGF Signaling	1.84	2.12132	FOS,MAP2K7,MAPK1,MAPK8,PIK3CD,PLCG1,STAT1,STAT3
PEDF Signaling	1.66	2.12132	FAS,KRAS,MAPK1,NFKB2,NFKBIA,NFKBID,PIK3CD,RELA,TCF7,ZEB1
Type I Diabetes Mellitus Signaling	9.72	2.13809	CD28,CD86,FAS,FCER1G,HLA-A,HLA-B,HLA-C,HLA-DMA,HLA-DMB,HLA-DRA,HLA-DRB1,HLA-E,HLA-F,HLA-G,HSPD1,IRF1,MAP2K7,MAP3K14,MAPK1,MAPK8,NFKB2,NFKBIA,NFKBID,RELA,STAT1,TNF,TRGV9
Colorectal Cancer Metastasis Signaling	3.33	2.2	BAX,BRAF,E2F4,FOS,GNG2,GNG5,IL6ST,JAK3,KRAS,LEF1,LRP1,MAPK1,MAPK8,MLH1,MMP14,NFKB2,PIK3CD,PTGER4,RALGDS,RELA,RHOC,RHOH,STAT1,STAT3,TCF7,TGFBR2,TLR4,TNF,VEGFB
Phospholipase C Signaling	2.98	2.2	AHNAK,CALM1 (includes others),CAMK4,FCER1G,FYN,GNG2,GNG5,GRAP2,HDAC6,ITGB2,ITK,KRAS,LYN,MAPK1,MYL12A,MYL6,NFAT5,NFATC2,NFKB2,PLCG1,PLD3,PPP3CC,PRKCZ,RALGDS,RELA,RHOC,RHOH,TRGV9,ZAP70
Coronavirus Pathogenesis Pathway	14.8	2.2711	BAX,CCL5,CTSL,DDX58,E2F4,FAU,FOS,IRF7,IRF9,MAPK1,MAPK8,NFKB2,NFKBIA,NFKBID,PYCARD,RELA,RPS11,RPS13,RPS14,RPS15,RPS15A,RPS19,RPS2,RPS21,RPS23,RPS24,RPS26,RPS27A,RPS27L,RPS28,RPS3,RPS3A,RPS7,RPS8,RPSA,STAT1,STAT2,STAT3,TGFBR2
Acute Myeloid Leukemia Signaling	4.83	2.3094	BRAF,EIF4EBP1,FLT3LG,IDH2,IDH3B,KRAS,LEF1,MAP2K7,MAPK1,NFKB2,PIK3CD,PIM2,PML,RELA,STAT3,STAT5B,TCF7
Ceramide Signaling	2.73	2.3094	CTSD,FOS,KRAS,MAPK8,NFKB2,PIK3CD,PPP2R1B,PRKCZ,RELA,S1PR1,S1PR4,SMPD1,TNF
LPS-stimulated MAPK Signaling	2.48	2.3094	FOS,KRAS,MAP3K14,MAPK1,MAPK8,NFKB2,NFKBIA,NFKBID,PIK3CD,PRKCZ,RELA,TLR4
IL-1 Signaling	2.55	2.33333	FOS,GNA12,GNAI2,GNG2,GNG5,MAP2K7,MAP3K14,MAPK1,MAPK8,NFKB2,NFKBIA,NFKBID,RELA
Thrombopoietin Signaling	1.96	2.33333	FOS,KRAS,MAPK1,PIK3CD,PLCG1,PRKCZ,STAT1,STAT3,STAT5B
Growth Hormone Signaling	1.64	2.33333	FOS,MAPK1,PIK3CD,PLCG1,PRKCZ,RPS6KA5,STAT1,STAT3,STAT5B
IL-3 Signaling	1.38	2.33333	FOS,KRAS,MAPK1,PIK3CD,PPP3CC,PRKCZ,STAT1,STAT3,STAT5B
Thyroid Cancer Signaling	1.38	2.33333	BRAF,FOS,KRAS,LEF1,MAPK1,NTRK2,PDK1,PIK3CD,TCF7
Role of Hypercytokinemia/hyperchemokinemia in the Pathogenesis of Influenza	7.74	2.4004	CCL5,DDX58,EIF2AK2,IFIT2,IFIT3,IL18,IRF7,IRF9,ISG15,ISG20,MX1,NFKB2,OAS1,OAS3,PYCARD,RSAD2,S1PR1,STAT1,STAT2,TLR4,TNF
Death Receptor Signaling	7.19	2.4004	ACTB,BIRC3,CASP6,FAS,LIMK1,MAP2K7,MAP3K14,MAPK8,NFKB2,NFKBIA,NFKBID,PARP10,PARP11,PARP12,PARP14,PARP9,RELA,TNF,TNFRSF10A,TNFRSF25,TNFSF10
JAK/Stat Signaling	3.12	2.49615	CEBPB,FOS,JAK3,KRAS,MAPK1,NFKB2,PIK3CD,RELA,STAT1,STAT2,STAT3,STAT4,STAT5B
PI3K Signaling in B Lymphocytes	3.77	2.52357	CALM1 (includes others),CAMK4,CD40,CD81,FOS,FYN,KRAS,LYN,MAPK1,NFAT5,NFATC2,NFKB2,NFKBIA,NFKBID,PIK3CD,PLCG1,PPP3CC,PRKCZ,RELA,TLR4
TNFR1 Signaling	3.9	2.52982	BIRC3,CASP6,FOS,MAP3K14,MAPK8,NFKB2,NFKBIA,NFKBID,RELA,TNF,TNFAIP3
IL-23 Signaling Pathway	3.72	2.52982	IL22,NFKB2,NFKBIA,PIK3CD,RELA,RORA,RORC,STAT3,STAT4,TNF
PDGF Signaling	1.53	2.52982	EIF2AK2,FOS,JAK3,KRAS,MAPK1,MAPK8,PIK3CD,PLCG1,STAT1,STAT3
HER-2 Signaling in Breast Cancer	6.43	2.55604	BRAF,CASP6,CDKN1B,COX4I1,COX6A1,COX6B1,COX6C,COX7A2,COX7A2L,COX7B,COX7C,COX8A,CYB5A,ELF1,FCER1G,FOS,FYN,ITGB2,KRAS,LYN,MAPK1,NFKB2,NFKBIA,NFKBID,PARD6A,PDK1,PIK3CD,PLCG1,PRKCZ,RELA,STAT3
FAT10 Cancer Signaling Pathway	1.76	2.64575	NFKB2,NFKBIA,PCNA,RELA,STAT3,TGFBR2,TNF
IL-6 Signaling	2.94	2.66789	CEBPB,FOS,IL18,IL6ST,KRAS,MAP2K7,MAP3K14,MAPK1,MAPK8,MCL1,NFKB2,NFKBIA,NFKBID,PIK3CD,RELA,STAT3,TNF
Interferon Signaling	10.3	2.67261	BAX,IFI35,IFI6,IFIT1,IFIT3,IFITM1,IRF1,IRF9,ISG15,MED14,MX1,OAS1,RELA,STAT1,STAT2,TAP1
CD28 Signaling in T Helper Cells	11	2.68328	ARPC1B,ARPC5,CALM1 (includes others),CAMK4,CD28,CD86,CTLA4,FCER1G,FOS,FYN,GRAP2,HLA-A,HLA-B,HLA-DMA,HLA-DMB,HLA-DRA,HLA-DRB1,ITK,MAPK8,NFAT5,NFATC2,NFKB2,NFKBIA,NFKBID,PIK3CD,PLCG1,PPP3CC,RELA,TRGV9,ZAP70
iCOS-iCOSL Signaling in T Helper Cells	10.5	2.71069	CALM1 (includes others),CAMK4,CD28,CD40,CD40LG,CD86,FCER1G,GRAP2,HLA-A,HLA-B,HLA-DMA,HLA-DMB,HLA-DRA,HLA-DRB1,ICOS,ITK,NFAT5,NFATC2,NFKB2,NFKBIA,NFKBID,PIK3CD,PLCG1,PPP3CC,RELA,TRAT1,TRGV9,ZAP70
NF-κB Activation by Viruses	2.32	2.7136	EIF2AK2,KRAS,MAP3K14,MAPK1,NFKB2,NFKBIA,NFKBID,PIK3CD,PRKCZ,RELA,TNFRSF14
FLT3 Signaling in Hematopoietic Progenitor Cells	2.15	2.7136	EIF4EBP1,FLT3LG,KRAS,MAPK1,PIK3CD,RPS6KA5,STAT1,STAT2,STAT3,STAT4,STAT5B
Tec Kinase Signaling	8.75	2.74563	ACTB,FAS,FCER1G,FOS,FYN,GNA12,GNAI2,GNG2,GNG5,ITGB2,ITK,JAK3,LYN,MAPK8,NFKB2,PIK3CD,PLCG1,PRKCZ,RELA,RHOC,RHOH,STAT1,STAT2,STAT3,STAT4,STAT5B,TLR4,TNF,TNFRSF10A,TNFRSF25,TNFSF10,TRGV9,TXK
IL-9 Signaling	3.28	2.82843	JAK3,NFKB2,PIK3CD,RELA,STAT1,STAT3,STAT5B,TNF
ERK/MAPK Signaling	2.4	2.83683	BRAF,DUSP1,DUSP6,EIF4EBP1,ELF1,FOS,FYN,H3-3A/H3-3B,ITGB2,KRAS,MAPK1,PIK3CD,PLCG1,PPP1CA,PPP1CC,PPP1R14B,PPP1R7,PPP2R1B,RPS6KA5,STAT1,STAT3,VRK2
Prolactin Signaling	3.07	2.88675	CEBPB,FOS,FYN,IRF1,KRAS,MAPK1,PIK3CD,PLCG1,PRKCZ,STAT1,STAT3,STAT5B,TCF7
B Cell Receptor Signaling	1.86	2.9824	CALM1 (includes others),CAMK4,KRAS,LYN,MAP2K7,MAP3K14,MAP3K2,MAPK1,MAPK8,NFAT5,NFATC2,NFKB2,NFKBIA,NFKBID,PAG1,PIK3CD,PPP3CC,RASSF5,RELA
Spliceosomal Cycle	2.76	3	BCAS2,DDX39B,GPKOW,HSPA8,SF1,SF3A1,SF3B3,SNRNP200,XAB2
Retinoic acid Mediated Apoptosis Signaling	2.61	3.16228	DAP3,IRF1,PARP10,PARP11,PARP12,PARP14,PARP9,RARG,TNFRSF10A,TNFSF10
IL-15 Production	1.93	3.20713	FLT3LG,FYN,IRF1,ITK,JAK3,LYN,MAP2K7,NFKB2,NTRK2,PRKCZ,RELA,STAT1,TXK,ZAP70
Regulation Of The Epithelial Mesenchymal Transition By Growth Factors Pathway	2.44	4.14614	BRAF,CD40LG,DOCK10,FOS,ID2,JAK3,KRAS,LTB,MAP2K7,MAPK1,MAPK8,NFKB2,PARD6A,PIK3CD,RELA,STAT3,TGFBR2,TNF,TNFSF10,TNFSF14,ZEB1
Systemic Lupus Erythematosus In B Cell Signaling Pathway	6.49	4.32346	CALM1 (includes others),CAMK4,CD40,CD40LG,CD5,FOS,FYN,IFIT2,IFIT3,IL18,IL6ST,IRF7,IRF9,ISG15,ISG20,KRAS,LILRB4,LTB,LYN,MAP3K14,MAPK1,MCL1,NFAT5,NFATC2,NFKB2,PAG1,PDCD1,PIK3CD,PIM2,PPP3CC,PRKCZ,RASGRP2,RELA,STAT1,STAT2,STAT3,TNF,TNFSF10,TNFSF14
