# Supplementary material for: Impaired immune signaling and changes in the lung microbiome precede secondary bacterial pneumonia in COVID-19
Source: Res Sq. 2021 Apr 23:rs.3.rs-380803. Preprint. [Version 1] doi: 10.21203/rs.3.rs-380803/v1 (PMC8132240; doi:10.21203/rs.3.rs-380803/v1)
Supplement: Supplement 8 [file db08ccf8a28d9f9ee6c1c8e7.xlsx]

## Sheet: MonoMac_VAP_vs_NOVAP_EarlyTime
Upstream Regulator_Cytokine	Activation z-score	p-value of overlap	Target molecules in dataset	Mechanistic Network
TNF	-5.288	5.66e-43	ACP5,ACTB,ADAM17,adenosine triphosphate,ADRB2,AKR1B1,ALDH2,AMPD3,ANXA1,APOC2,APOE,AQP9,ATF4,ATP2B1,B2M,BHLHE41,BLVRA,BTG1,BTG3,CCL18,CCL3,CD36,CD44,CD59,CD83,CFD,CHI3L1,CITED2,CLEC4E,COTL1,CTNNB1,CTSC,CTSK,CTSS,CXCL2,CXCL8,CXCR4,CYBA,DDIT3,DDX5,DUSP1,DUSP2,ECH1,EGR1,EHD1,FABP4,FCER1G,FOS,FOSB,FOSL2,FTH1,G0S2,GADD45B,GM2A,GNAI2,GSTP1,HCAR3,HES1,HEXB,HLA-E,HSP90AB1,HSP90B1,HSPA1A/HSPA1B,IER2,IER3,I…	CEBPB,CREBBP,IFNG,IL1B,JUN,NFKB1,NFKBIA,NFkB (complex),NR3C1,REL,RELA,SMAD3,SMAD4,SP1,STAT1,STAT3,TGFB1,TNF
IL1B	-5.114	2.78e-33	adenosine triphosphate,ADRB2,AKR1B1,AMPD3,ANXA1,APOC2,APOE,ATF4,B2M,CCL3,CCL3L1,CCRL2,CD44,CD74,CD83,CHI3L1,CSRNP1,CTNNB1,CTSS,CXCL2,CXCL8,CXCR4,CYBA,DDIT3,DDX5,DUSP1,EGR1,EIF4E,FOS,FOSB,G0S2,GADD45B,GCHFR,GM2A,HES1,HEXB,HLA-E,HMGA1,HSPA1A/HSPA1B,IER2,IER3,IL1RN,IL6R,IRAK1,IRAK2,IRF1,ITGA5,ITGAM,JUN,JUNB,JUND,KLF10,MCL1,MMP12,MMP9,MT2A,NAMPT,NEAT1,NFKB1,NFKB2,NFKBIA,NFKBIZ,NR4A1,OLR1,OSM,P4HB,PHL…	CEBPB,CREBBP,FOSL1,IFNG,IL1A,IL1B,NFKB1,NFKBIA,NFkB (complex),NR3C1,REL,RELA,SP1,STAT1,STAT3,TNF
CD40LG	-4.256	3.09e-26	ADAM17,AHR,AKAP13,B2M,BTG1,BTG3,CCL18,CCL3,CD44,CD83,CTSC,CXCL2,CXCL8,CXCR4,DECR1,DUSP1,DUSP2,EGR1,FOS,FOSB,FOSL2,G0S2,HSPA1A/HSPA1B,ID2,IRF1,ITGAM,JUN,JUNB,JUND,KDM6B,MAP2K3,MARCKS,MCL1,MT2A,NAMPT,NFKB1,NFKB2,NFKBIA,PLAUR,PLEK,PSMB9,PSME1,PSME2,REL,TANK,TNFAIP2,TNFAIP3,TNIP1,TRAF1,TREM2,TUBB,VEGFA,ZFP36L1	CD40,CD40LG,CREBBP,IL6,NFKB1,NFKBIA,NFkB (complex),NR3C1,REL,RELA,SP1,STAT3,TNF
CSF2	-3.845	8.12e-24	ACP5,ADAM17,ADGRE5,AKR1A1,ANXA1,CCL18,CCL3,CCRL2,CD74,CD83,CLEC4E,CLEC7A,CTSC,CXCL2,CXCL8,CXCR4,DDIT3,DUSP2,EGR1,FOS,HCAR3,ID2,IER3,IL1RN,IRAK1,ITGAM,ITGAX,JUN,JUNB,MCL1,MMP9,NFKB1,NFKB2,NFKBIA,NR4A1,OLR1,OSM,PLAUR,PPIF,PPP1R15A,QSOX1,RBM3,SERPINB9,SGK1,SLC2A3,SLC7A11,SPHK1,SPP1,SQSTM1,TLR2,TNFAIP3,TNFRSF1B,TNFSF14,TPI1,TPM4,TPT1,TREM1,ZFP36	CSF2,EGR1,IL10,IL1B,NFKB1,NFKBIA,NFkB (complex),NR3C1,P38 MAPK,RELA,SP1,STAT1,STAT3,TNF
IL6	-3.477	7.89e-14	adenosine triphosphate,ADGRE5,AHR,ANXA1,APOE,CCL3L1,CD36,CD44,CD68,CD74,CD83,CFD,CLEC4E,COX4I1,CSF3R,CST3,CTNNB1,CTSC,CTSK,CXCL2,CXCL8,CXCR4,DUSP1,EGR1,FOS,GADD45B,GLRX,HLA-DRB5,ID2,IL1RN,IL6R,IRF1,ITGAM,JUN,JUNB,JUND,MCL1,MMP12,MMP9,MSR1,NAMPT,NFKB1,NFKBIA,PLEK,PPP1R15A,PSMB9,PSME1,PSME2,SGK1,SPP1,TLR2,TNFRSF1B,VASP,VEGFA,VIM	CEBPB,CSF3,Creb,FOXO3,IL10,IL1B,IL6,JUN,NFKB1,NFKBIA,NFkB (complex),NR3C1,RELA,SP1,STAT1,STAT3
IL33	-3.234	2e-20	ACTB,APOE,ARFGAP3,CCL18,CCL3,CD36,CLEC4E,CSF3R,CXCL2,CXCL8,DUSP2,EHD1,FGR,G0S2,GADD45B,GCHFR,IL1RN,ITGA5,ITGAM,ITGAX,JUNB,MMP12,MSR1,NABP1,NFKB1,NFKB2,NFKBIA,NFKBID,NFKBIZ,PIK3R5,POU2F2,RAPGEF1,REL,SLC7A11,TLR2,TNFAIP2,TNFAIP3,TNFRSF1B,TRAF1,ZFHX3	IL1B,IL33,Ige,NFKB1,NFKBIA,NFkB (complex),NR3C1,Nfat (family),RELA,RNA polymerase II,SP1,STAT3,TNF,TNFSF11
WNT3A	-3.207	0.00527	AHR,CD44,CD68,CFD,CTNNB1,FABP4,GPNMB,JUN,KLF4,NUMB,RFLNB,SLC7A11,VEGFA,VIM	AR,ATF2,Ap1,CTNNB1,FOS,FOXM1,FOXO3,Ins1,LEF1,MYC,NFkB (complex),PPARG,SMAD3,SMARCA4,SP1,SRC,SREBF1,SRF,STAT3,TCF7L2,Vegf,WNT3A,estrogen receptor
CCL5	-3.002	1.37e-20	ADGRE5,AHR,ATF4,CCL3,CCRL2,CD44,CXCL2,CXCL8,DUSP1,FOS,HMGA1,IER2,ITGAM,LIMS1,MMP9,NAMPT,NCOR2,OLR1,PLAUR,PPIF,SGK1,SOD1,VASP,ZFP36	Ap1,CCL5,CREBBP,ERK1/2,FOSL1,FOXO3,JUN,NFKB1,NFKBIA,NFkB (complex),NR3C1,PI3K (complex),RELA,SP1,STAT1,STAT3,TNF
IL18	-2.886	6.64e-06	adenosine triphosphate,CCL3,CCRL2,CD44,CD83,CXCL8,FOSL2,GADD45B,IRF1,ITGAM,JUN,MMP9,NFKBIZ,SLC2A3,SPP1,VEGFA	Ap1,FAS,HMGB1,IL18,IL1B,JUN,MYD88,NFKB1,NFKBIA,NFkB (complex),NR3C1,PI3K (complex),RELA,SP1,STAT3
IFNG	-2.751	1.59e-38	ACTB,ADAM17,adenosine triphosphate,AHR,AQP9,ARFGAP3,ATF4,B2M,BTG1,C1QA,C1QB,C1QC,CCL18,CCL3,CCRL2,CD36,CD44,CD68,CD74,CD83,CLEC4E,CLEC7A,CTNNB1,CTSC,CTSK,CTSS,CXCL2,CXCL8,CXCR4,CYB5A,CYBA,DAPK1,DDIT3,DDX5,DECR1,DUSP1,EGR1,FBP1,FCER1G,FOS,FOSB,FTH1,GCHFR,GNAI2,GSTP1,HCAR3,HLA-DRB5,HLA-E,HMGA1,HSP90AB1,HSPA1A/HSPA1B,IER2,IER3,IFI27,IFI30,IFITM2,IL1RN,IL6R,IRAK1,IRAK2,IRF1,ITGA5,ITGAM,ITGAX,JUN,JUNB…	FOXO3,HDAC3,IFNG,IL10,IL1B,IL4,JUN,NFKB1,NFKBIA,NFkB (complex),NR3C1,RELA,STAT1,STAT3,STAT6,TNF
C5	-2.645	2.65e-07	CCL3,CD59,CXCL2,CXCL8,EGR1,ITGAM,MMP9,NFKB1,NFKBIA,PLK3,PPP1R15A,TNFAIP2,TNFAIP3,VEGFA,ZFP36	C5,CSF2,IL1,IL1B,NFKB1,NFKBIA,NFkB (complex),NR3C1,RELA,SP1,STAT3,TNF
IL2	-2.611	1.1e-13	ADCY3,AHR,ANXA1,ARAP1,ARHGEF2,CAPG,CCL3,CCL3L1,CD44,CD59,CD74,CD83,CSRNP1,CTSC,CXCL8,CXCR4,DAPK1,DUSP2,FCER1G,FOS,GADD45B,GAPDH,HSP90B1,HSPA1A/HSPA1B,IER3,IRF1,JUN,JUND,KLF6,LCP2,MCL1,MMP9,NDRG1,NEAT1,NFKB1,OSM,PDIA3,PHLDA1,SERPINB9,SLC2A3,SPP1,TLR2,TNFRSF1B,TNFSF14,TPI1,TRAF1,VEGFA,VIM	Ap1,CREBBP,HDAC3,IL12 (complex),IL1B,IL2,IL4,IL6,NFKB1,NFKBIA,NFkB (complex),NR3C1,RELA,SP1,STAT3,STAT6
TNFSF11	-2.366	1.79e-17	ACP5,AHR,AKAP13,AQP9,CD44,CD83,CLEC4E,CREBRF,CTNNB1,CTSK,CXCL8,DUSP1,EHD1,FGR,FOS,GADD45B,GLRX,IER3,IL1RN,ITGA5,ITGAM,JUN,JUNB,MMP9,NFKB1,NFKB2,NFKBIA,NFKBIZ,PLAUR,SERPINB9,SPP1,TLR2,TNFRSF1B,TNIP1,TRAF1	CEBPB,EGR1,IFNG,IL6,NFKB1,NFKBIA,NFkB (complex),NR3C1,P38 MAPK,RELA,SP1,STAT1,STAT3,TNF,TNFSF11
THPO	-2.36	7.41e-05	CD44,FOS,IRF1,KLF4,NFKB2,NFKBIA,NFKBIZ,REL,TNFAIP3,VEGFA	Ap1,Creb,FOXO3,JUN,NFKB1,NFKBIA,NFkB (complex),PI3K (complex),REL,RELA,SP1,STAT1,STAT3,THPO,VAV1,VAV2
PF4	-2.351	8.54e-08	CCL3,CD83,CXCL8,IRF1,ITGAM,KLF4,NFKB2,NFKBIA,NFKBIZ,REL,SPHK1,TNFAIP3	Ap1,CAMP,HMGB1,JUN,LYN,NFKB1,NFKBIA,NFkB (complex),NR3C1,PF4,PI3K (complex),PROC,RELA,STAT3,TNF
EDN1	-2.337	1.85e-11	ACTB,ANXA1,CST3,CTNNB1,CXCL8,CXCR4,EGR1,FOS,FOSB,ITGA5,ITGAM,JUN,JUNB,MMP9,MYL6,MYO9B,OLR1,PDIA6,PLAUR,SOD1,TPM4,TPT1,VCAN,VEGFA,VIM	ATF2,Ap1,CREBBP,Creb,EDN1,EGFR,ELK1,ERK1/2,ESR1,FOS,FOSL1,HRAS,MAPK3,Mapk,NFkB (complex),RELA,RNA polymerase II,SMAD3,SP1,STAT3,TP53
IL17A	-2.272	2e-09	ACTB,CD68,CD83,COTL1,CTSK,CXCL2,CXCL8,CXCR4,ECHS1,FOS,HEXB,IL1RN,JUN,MAP2K3,MCL1,MMP9,NFKBIZ,PI3,SGK1,TLR2,TNFAIP3,TNFRSF14,TNFRSF1B,VEGFA,VIM	CEBPB,CSF3,Creb,EGR1,IL10,IL17A,IL6,NFKB1,NFKBIA,NFkB (complex),NR3C1,P38 MAPK,RELA,SP1,STAT1,STAT3,TNF
IL1A	-2.261	4.28e-12	CCL3,CD44,CD83,CTSK,CXCL2,CXCL8,FOS,FOSB,FTH1,IER3,IL1RN,IRAK1,IRF1,ITGA5,JUN,JUNB,MMP12,MMP9,MT2A,NFKB1,NFKBIA,NFKBIZ,PI3,S100A10,SPP1,TLR2,TNFAIP3,VIM	Ap1,CEBPB,EP300,IFNG,IL1A,MYD88,NFKB1,NFKBIA,NFkB (complex),NR3C1,RELA,SP1,STAT1,STAT3,TNF,hyaluronic acid
LTA	-2.236	0.00798	CD44,ITGA5,NFKB1,NFKB2,REL	Ap1,BCL6,Igm,LTA,NFKB1,NFKBIA,NFkB (complex),NR3C1,RELA,SP1,STAT3,STAT5A,TNF
IL22	-2.216	0.0112	CXCL2,CXCL8,CYBA,FTH1,HSP90AB1,MCL1,MMP9,PI3
MIF	-2.103	0.000533	CD44,CXCL2,CXCL8,CXCR4,DUSP1,FOS,JUN,MMP9,RETN,RPS27	Ap1,CREBBP,EGR1,IL10,JUN,Jnk,MEF2C,MIF,NFKB1,NFKBIA,NFkB (complex),P38 MAPK,PI3K (complex),RELA,SP1,STAT1,STAT3,cytokine
CSF3	-2.053	2.94e-12	adenosine triphosphate,CAPG,CCL3,CD44,CSF3R,CST3,CTNNB1,CXCL2,CXCL8,CXCR4,EGR1,FOS,GADD45B,HLA-DPA1,IL1RN,ITGAM,JUN,MCL1,MMP9,NME2,TLR2,TNFAIP3,TNFRSF1B,VEGFA	Ap1,CREBBP,CSF3,EGR1,IL12 (complex),IL1B,IL6,NFKB1,NFKBIA,NFkB (complex),NR3C1,P38 MAPK,RELA,SP1,STAT3

## Sheet: Neutro_VAP_vs_NOVAP_EarlyTime
Upstream Regulator_Cytokine	Activation z-score	p-value of overlap	Target molecules in dataset	Mechanistic Network
TNF	-3.614	2.84e-41	ACSL1,ACTB,ADAM17,ADAM8,ADORA2A,ALOX5AP,AMPD3,AQP9,ATP2B1,B2M,B4GALT1,BCL2A1,CAMP,CARD16,CASP1,CASP4,CCL3,CCL4,CCR1,CD163,CD82,CD83,CEBPB,CEBPD,CFLAR,CHI3L1,CLEC4E,CST7,CTSS,CXCL16,CXCL2,CXCL8,CXCR1,CXCR2,CXCR4,CYLD,CYP1B1,DDIT3,DDX5,DENND4A,DSC2,EFHD2,EGR3,EHD1,FCAR,FCER1G,FOS,FOSB,FOSL2,FPR1,FTH1,G0S2,GADD45B,GCH1,GCLM,GPR84,GRN,HCAR3,HIVEP1,HLA-A,HMOX1,ICAM1,IER3,IFI16,IFIT3,IFITM1,IFNGR2,IL10…	Ap1,CEBPB,CSF2,IFNG,IL1B,NFKB1,NFKBIA,NFkB (complex),RELA,SP1,STAT1,STAT3,TNF,TP53
TNFSF11	-3.572	2.65e-14	ADGRE1,AQP9,BCL2A1,CCL4,CCR1,CD83,CLEC4E,CXCL8,EHD1,FGR,FOS,FPR1,GADD45B,GCH1,GRN,HCK,HMOX1,ICAM1,IER3,IL1A,IL1B,IL1RN,NFKB1,NFKB2,NFKBIA,NFKBIB,NFKBIZ,PTGER4,PTGS2,PTPRE,RALGDS,SERPINB9,TLR2,TNFRSF1B,TNIP1,TRAF1	Ap1,CHUK,IL1B,KLF6,NFKB1,NFKBIA,NFkB (complex),NOTCH1,RELA,STAT3,TNFSF11,TP53
IL4	-3.554	9e-18	ACSL1,ACTB,ACTG1,ADAM17,ADGRE1,ALDH1A2,ALOX5AP,ATP5MD,CCL3,CCL4,CD163,CD83,CFLAR,CHD4,COL6A3,CSF3R,CST7,CXCL16,CXCL2,CXCL8,CXCR1,CXCR4,DENND4A,EFHD2,EIF4A1,FCER1G,FCGR3A/FCGR3B,FLNA,FOS,FOSB,GBE1,GBP5,GLIPR2,HCK,ICAM1,IER3,IFI16,IFI30,IFIT3,IFITM3,IFNGR2,IGF2R,IL10RA,IL18R1,IL1A,IL1B,IL1R2,IL1RL1,IL1RN,IL4R,ITGAX,JUND,KDM6B,KLF6,LCP2,LGALS3,MCL1,MYH9,NABP1,NEDD9,NFKB1,NFKB2,NFKBIA,NUP214,OSM,PIM2…	Ap1,CD40,CEBPB,IFNG,IL10,IL4,NFKB1,NFKBIA,NFkB (complex),PPARA,REL,RELA,STAT1,STAT3,STAT5a/b,STAT6,TNF
CSF2	-3.031	9.74e-21	ADAM17,ADAM8,ADGRE5,ALOX5AP,BCL2A1,CARD16,CASP1,CCL3,CCL4,CCR1,CD163,CD63,CD83,CLEC4E,CXCL2,CXCL8,CXCR4,DDIT3,EGR3,FCGR1A,FFAR2,FOS,GCH1,GCLM,GK,HCAR3,HMOX1,ICAM1,IER3,IFITM3,IL1A,IL1B,IL1RL1,IL1RN,IRAK3,ITGAX,LY96,MCL1,NACA,NFE2,NFKB1,NFKB2,NFKBIA,NLRP3,OSM,PIM2,PLAU,PPIF,PPP1R15A,PROK2,PSEN1,PTGER4,PTGS2,RHOH,SERPINB9,SGK1,SQSTM1,TLR2,TNFAIP3,TNFRSF1B,TNFSF14,TREM1	Ap1,CEBPB,CSF2,IFNG,IL6,NFKB1,NFKBIA,NFkB (complex),PI3K (complex),RELA,SP1,STAT1,STAT3,TNF
CD40LG	-3.016	1.2e-22	ADAM17,B2M,BCL2A1,CASP1,CCL3,CCL4,CCR1,CD63,CD83,CFLAR,CXCL2,CXCL8,CXCR4,CYP1B1,FOS,FOSB,FOSL2,G0S2,GCH1,ICAM1,IFIT3,IFITM1,IL10RA,IL1A,IL1B,IL1RAP,IL4R,JUND,KDM6B,MAP2K3,MCL1,MT2A,NFKB1,NFKB2,NFKBIA,NFKBIB,NFKBIE,PLAU,PLEK,PSMB10,PSMB9,PSME1,PSME2,PTGS2,REL,SAMSN1,SELL,STAT3,TANK,TNFAIP2,TNFAIP3,TNFAIP6,TNFSF13B,TNIP1,TRAF1,VEGFA	Ap1,CD40,CD40LG,IL1B,KLF6,NFKB1,NFKBIA,NFkB (complex),REL,RELA,STAT3,TNF
CXCL8	-2.708	5.85e-07	CFLAR,CXCL2,CXCL8,CXCR1,CXCR2,ICAM1,IL1B,ITGAX,LGALS3,NFKBIA,PTGS2,RAC1,SELL	Ap1,CREB1,CXCL8,Creb,ERK,HMGB1,IL18,IL6R,JUN,NFKB1,NFKBIA,NFkB (complex),PI3K (complex),RELA,SP1,STAT3,histamine
IL3	-2.485	8.05e-12	ADGRE1,ADGRE5,ALOX5AP,CAMKK2,CD53,CD63,CD83,CXCL8,CXCR4,DAD1,DDIT3,EEF1A1,EGR3,FOS,FOSL2,FUS,GADD45B,HLA-A,HNRNPA2B1,ICAM1,IL1B,IL1RL1,ITGAX,MCL1,NACA,NCF1,NEDD9,OSM,PIM2,PSMB3,PSME1,RPL6,RPS7,SELL,TLR2,VASP,VEGFA	Ap1,BCL2,Creb,IL10,IL3,NFKB1,NFKBIA,NFkB (complex),P38 MAPK,PI3K (complex),RELA,SP1,STAT3,STAT5a/b
AIMP1	-2.412	2.38e-06	CCL3,CCL4,CXCL2,CXCL8,ICAM1,IL1B	AIMP1,Ap1,CEBPB,Creb,ERG,FOS,IL12B,JUN,Mapk,NFKB1,NFKBIA,NFkB (complex),REL,RELA,RHOA,SP1,STAT1,STAT3,TNFRSF1A,TP53
IL1A	-2.382	7.79e-14	ADORA2A,CAMP,CCL3,CCL4,CD83,CXCL2,CXCL8,FOS,FOSB,FTH1,GCH1,HMOX1,ICAM1,IER3,IFNGR2,IL1A,IL1B,IL1R2,IL1RN,MT2A,NFKB1,NFKBIA,NFKBIZ,PI3,PLAU,PTGS2,S100A10,S100A12,S100A8,STAT3,TIMP1,TLR2,TNFAIP3,ZC3H12A	Ap1,IL1A,KLF6,MYD88,NFKB1,NFKBIA,NFkB (complex),RELA,STAT3,TNF
IL17F	-2.376	0.000337	CXCL2,CXCL8,CXCR4,ICAM1,PTGS2,TNFRSF1B	ARRB1,CEBPA,CEBPB,CSF3,CXCL8,IL17A,IL17F,IL6,NFKB1,NFKBIA,NFkB (complex),RELA,SP1,STAT1,STAT3,TP53
EDN1	-2.151	2.58e-05	ACTB,BCL2A1,CST3,CXCL8,CXCR4,FOS,FOSB,GRN,ICAM1,MYL6,MYO9B,NCF1,PLAU,PTGER4,PTGS2,SELL,TIMP1,VEGFA	AKT1,ATF2,Ap1,CREB1,EDN1,EGFR,EGR1,ERK1/2,Jnk,NFKB1,NFKBIA,NFkB (complex),NR3C1,RELA,SP1,STAT3,VEGFA
IL12A	-2.133	0.0106	CFLAR,ICAM1,IL1A,IL1B,STAT3
IL33	-2.121	1.45e-33	ACTB,ARHGAP9,BCL2A1,CAMKK2,CASP1,CCL3,CCL4,CCR1,CD53,CD82,CLEC4E,CSF3R,CXCL16,CXCL2,CXCL8,CXCR2,DGAT2,EGR3,EHD1,FGR,FPR1,G0S2,GADD45B,HCK,HMOX1,ICAM1,IL10RA,IL1A,IL1B,IL1RL1,IL1RN,IRAK3,ITGAX,MCEMP1,NABP1,NFKB1,NFKB2,NFKBIA,NFKBIB,NFKBID,NFKBIE,NFKBIZ,NLRP3,PIK3R5,PILRA,PIM2,PTPRC,REL,S100A8,SUCNR1,TIMP1,TLR2,TNFAIP2,TNFAIP3,TNFRSF1B,TRAF1,TYROBP,VMP1,ZC3H12A,ZHX2	Ap1,FOXO1,IL33,Ige,MYD88,NFKB1,NFKBIA,NFkB (complex),RELA,STAT3,STAT5a/b,TNF,TNFSF11
TNFSF12	-2.068	1.41e-05	ADAM8,CCL3,CCR1,CLEC4E,CXCL2,CXCL8,ICAM1,IL1B,IL1R2,NFKB2,NFKBIA,S100A8,TIMP1	Ap1,BIRC3,CSF2,IL10,NFKB1,NFKB2,NFKBIA,NFkB (complex),REL,RELA,SP1,STAT3,STAT5a/b,TNF,TNFSF12,TP53
IL1B	-2.038	3.06e-25	ADAM8,AMPD3,APOL6,B2M,BCL2A1,CASP4,CCL3,CCL3L1,CCL4,CCR1,CD82,CD83,CEBPB,CEBPD,CFLAR,CHI3L1,CSRNP1,CTSS,CXCL2,CXCL8,CXCR1,CXCR4,DDIT3,DDX5,FOS,FOSB,G0S2,GADD45B,GCH1,GRN,HLA-A,HMOX1,ICAM1,IER3,IFI16,IFIT3,IL10RA,IL18R1,IL1A,IL1B,IL1R2,IL1RAP,IL1RL1,IL1RN,IRAK2,IRAK3,IRS2,JUND,LAMB3,LDLR,LUCAT1,LY96,MCL1,MT2A,NEAT1,NFAT5,NFKB1,NFKB2,NFKBIA,NFKBIB,NFKBIZ,NIBAN1,NMI,OSM,PI3,PLAU,PLK3,PLSCR1,PSEN1,PS…	Ap1,CEBPB,IFNG,IL1B,KLF6,NFKB1,NFKBIA,NFkB (complex),RELA,STAT1,STAT3,TNF,TP53
IL1RN	2.15	0.00012	CTSS,CXCL8,CYLD,ICAM1,IFIT3,IL1A,IL1B,KLF6,PELI1,PTGS2,SLC15A3,TIMP1,VEGFA	ARRB1,Ap1,CCL2,CEBPB,EGR1,HIF1A,IFNG,IL1R1,IL1RN,Jnk,NFKB1,NFkB (complex),NOS2,RELA,SMAD3,SP1,STAT1,STAT3
PRL	2.49	8.55e-08	ACTB,ACTR3,ANXA3,B2M,CEBPD,CST3,CTSA,CTSS,EPSTI1,FOS,HNRNPH2,IER3,IFIT3,IFITM1,MAFG,N4BP1,NFKB1,PLSCR1,PSME1,PSME2,RALB,RHOG,SP110,SPINK1,STAT3,TIMP1,TNFSF13B	CDKN2A,CEBPB,CEBPD,IRF1,IRF7,IRF8,Ins1,JUN,NFKB1,NFkB (complex),NR3C1,PGR,PPARG,PRL,RNA polymerase II,SMAD3,SPI1,SREBF1,STAT1,STAT3,STAT6,progesterone
